# Supplementary material for: Assessing the Immunomodulatory Effect of Size on the Uptake and Immunogenicity of Influenza- and Hepatitis B Subunit Vaccines In Vitro
Source: MDPI journal article supplement (doi:10.3390/ph15070887), 2022-07-18
Supplement: s1 [file s1]

# Report of Donor 45

Specimen Name: Donor 45

Run Time: 28-1-2022 10:32

Cytometer: NovoCyte Quanteon 621200611403

Software: NovoExpress 1.5.6

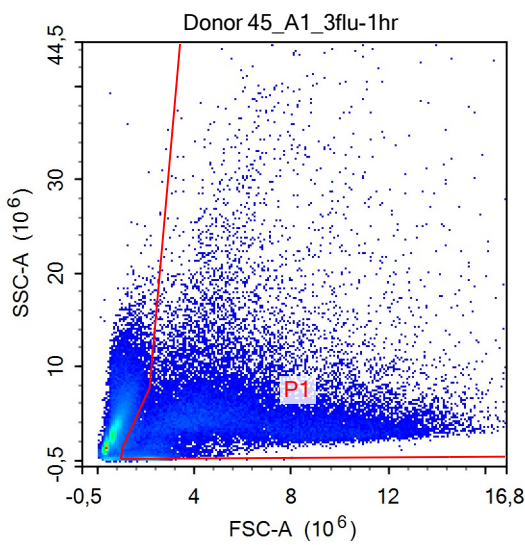

| Gate | Count   | % All   |
|------|---------|---------|
| All  | 281.446 | 100,00% |
| P1   | 34.976  | 12,43%  |

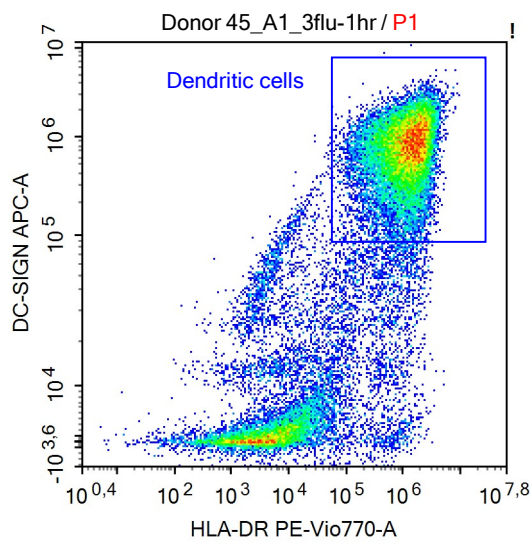

| Gate            | Count  | % P1    |
|-----------------|--------|---------|
| P1              | 34.976 | 100,00% |
| Dendritic cells | 20.266 | 57,94%  |

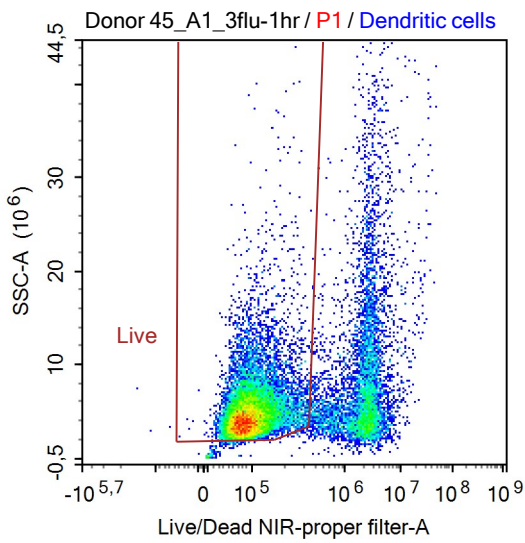

| Gate            | Count  | % Dendritic cells |
|-----------------|--------|-------------------|
| Dendritic cells | 20.266 | 100,00%           |
| Live            | 14.332 | 70,72%            |

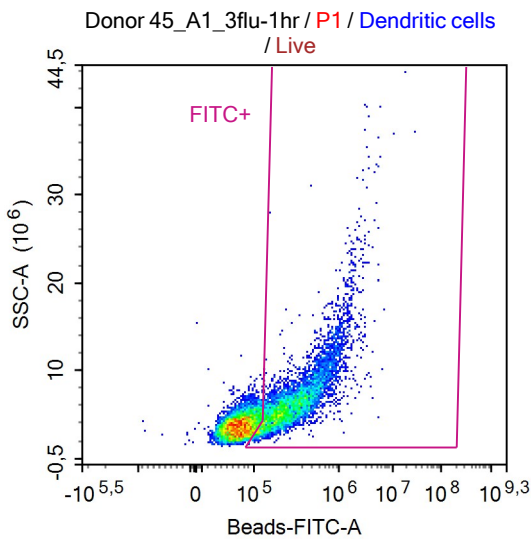

| Gate  | Count  | % Live  |
|-------|--------|---------|
| Live  | 14.332 | 100,00% |
| FITC+ | 6.710  | 46,82%  |

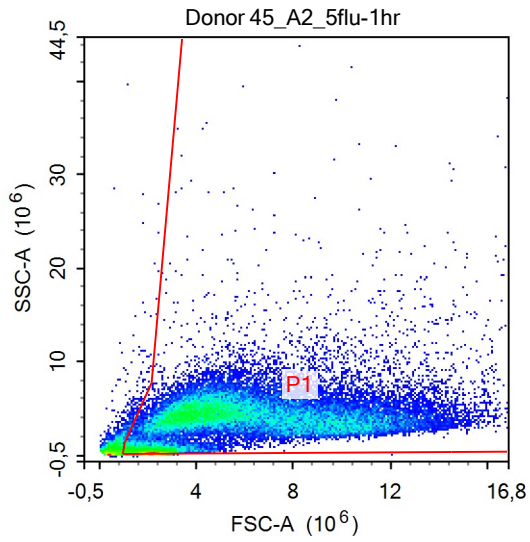

| Gate | Count  | % All   |
|------|--------|---------|
| All  | 63.900 | 100,00% |
| P1   | 50.451 | 78,95%  |

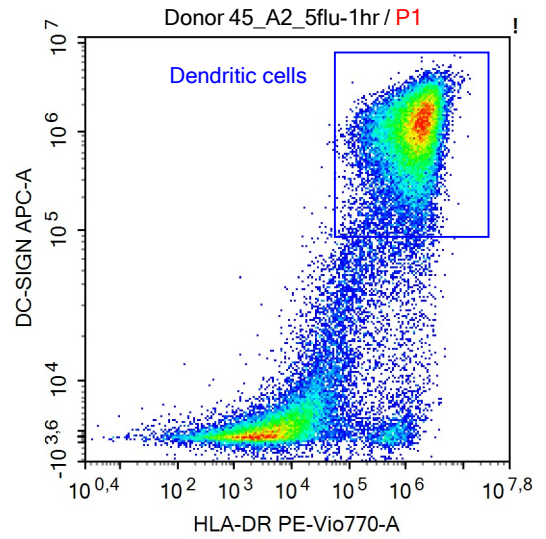

| Gate            | Count  | % P1    |
|-----------------|--------|---------|
| P1              | 50.451 | 100,00% |
| Dendritic cells | 26.998 | 53,51%  |

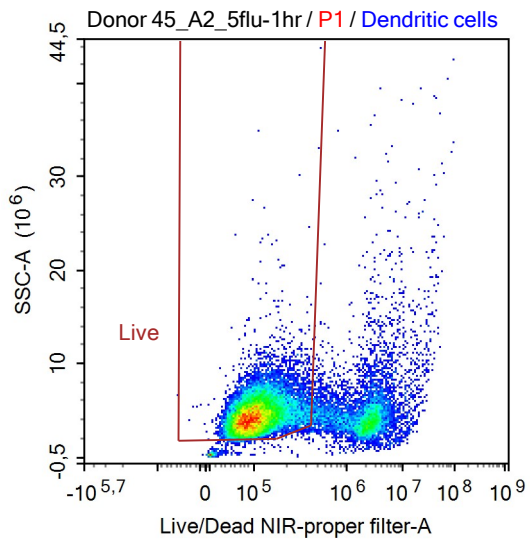

| Gate            | Count  | % Dendritic cells |
|-----------------|--------|-------------------|
| Dendritic cells | 26.998 | 100,00%           |
| Live            | 20.481 | 75,86%            |

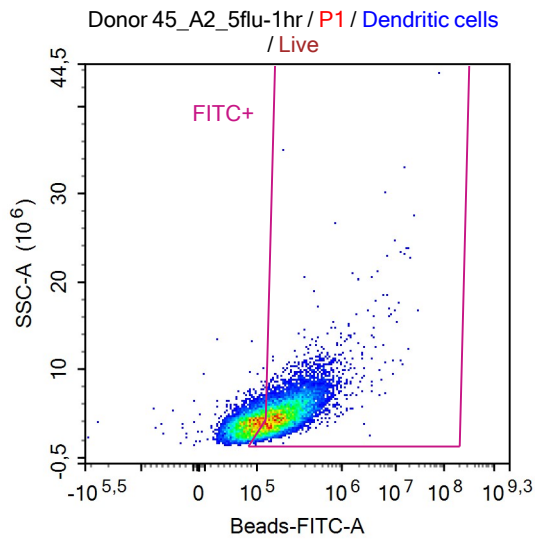

| Gate  | Count  | % Live  |
|-------|--------|---------|
| Live  | 20.481 | 100,00% |
| FITC+ | 11.605 | 56,66%  |

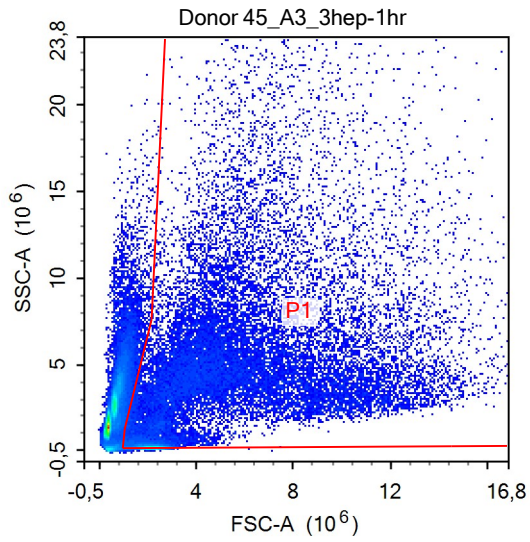

| Gate | Count   | % All   |
|------|---------|---------|
| All  | 255.755 | 100,00% |
| P1   | 36.758  | 14,37%  |

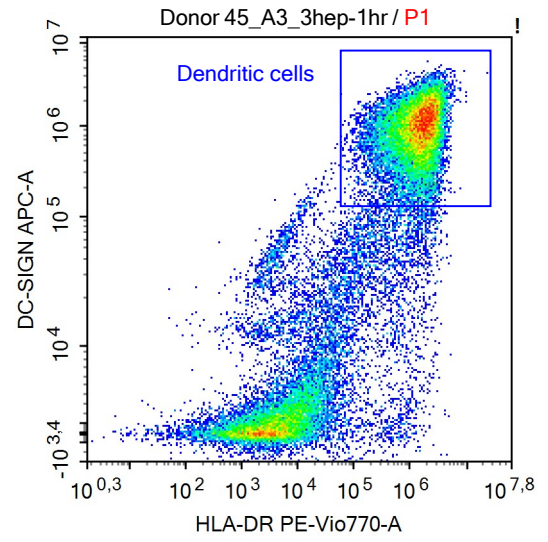

| Gate            | Count  | % P1    |
|-----------------|--------|---------|
| P1              | 36.758 | 100,00% |
| Dendritic cells | 17.695 | 48,14%  |

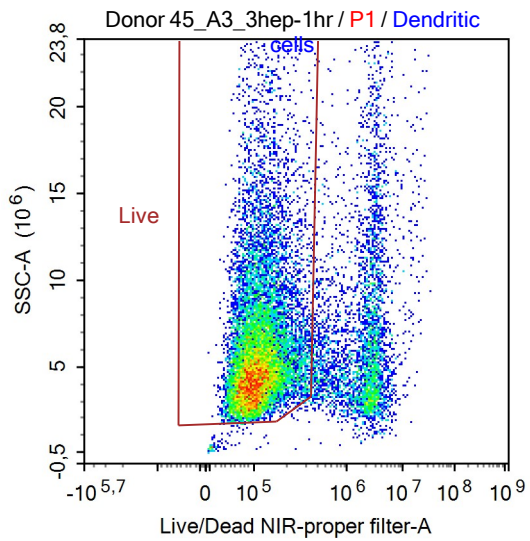

| Gate            | Count  | % Dendritic cells |
|-----------------|--------|-------------------|
| Dendritic cells | 17.695 | 100,00%           |
| Live            | 13.541 | 76,52%            |

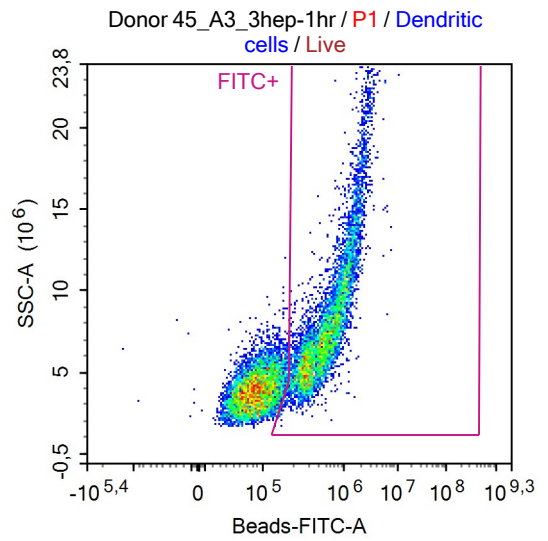

| Gate  | Count  | % Live  |
|-------|--------|---------|
| Live  | 13.541 | 100,00% |
| FITC+ | 7.169  | 52,94%  |

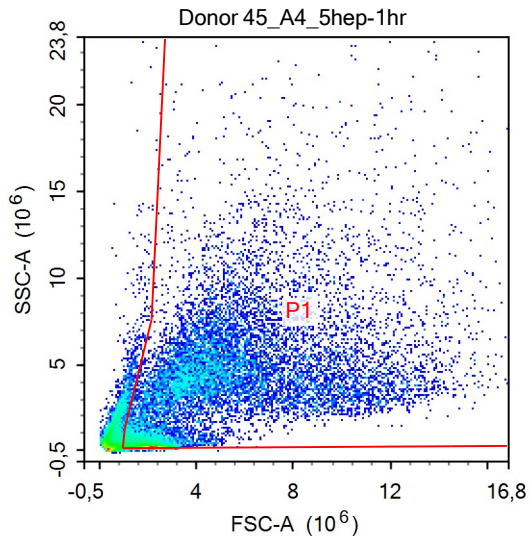

| Gate | Count  | % All   |
|------|--------|---------|
| All  | 38.761 | 100,00% |
| P1   | 25.881 | 66,77%  |

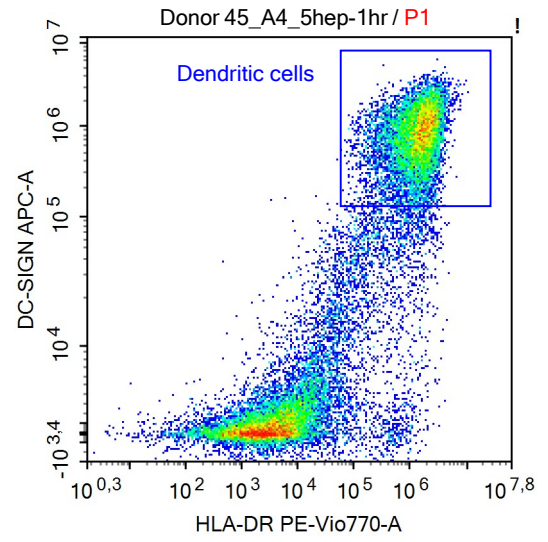

| Gate            | Count  | % P1    |
|-----------------|--------|---------|
| P1              | 25.881 | 100,00% |
| Dendritic cells | 9.117  | 35,23%  |

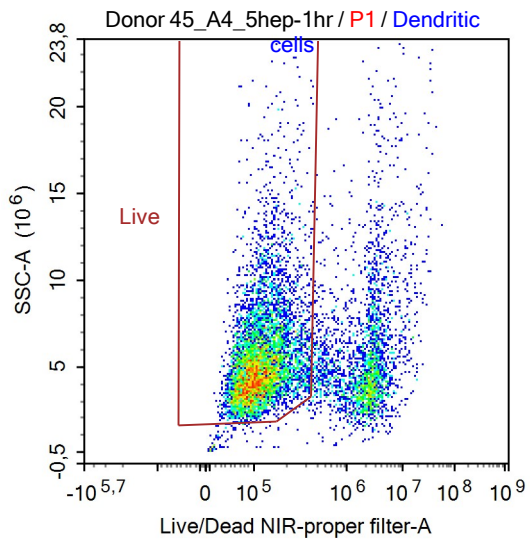

| Gate            | Count | % Dendritic cells |
|-----------------|-------|-------------------|
| Dendritic cells | 9.117 | 100,00%           |
| Live            | 6.356 | 69,72%            |

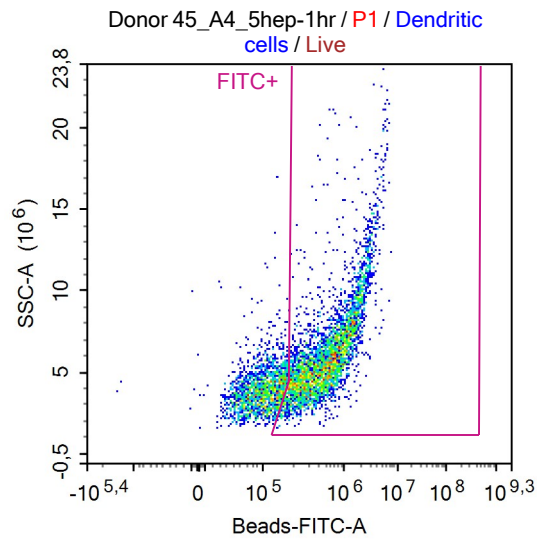

| Gate  | Count | % Live  |
|-------|-------|---------|
| Live  | 6.356 | 100,00% |
| FITC+ | 4.214 | 66,30%  |



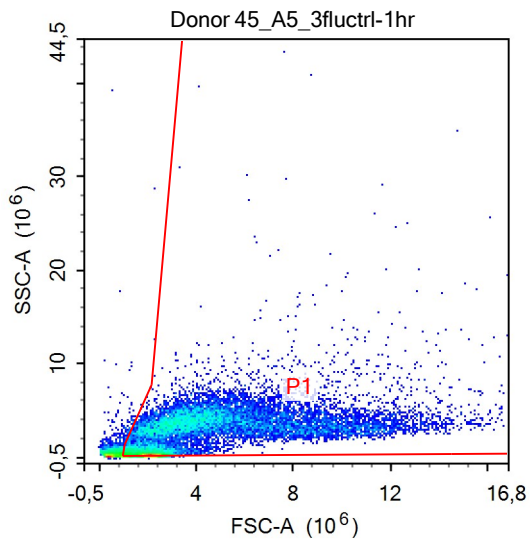

| Gate | Count  | % All   |
|------|--------|---------|
| All  | 33.043 | 100,00% |
| P1   | 23.100 | 69,91%  |

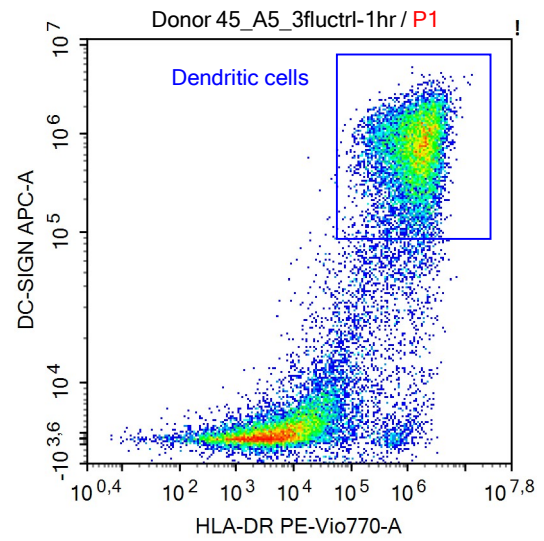

| Gate            | Count  | % P1    |
|-----------------|--------|---------|
| P1              | 23.100 | 100,00% |
| Dendritic cells | 9.429  | 40,82%  |

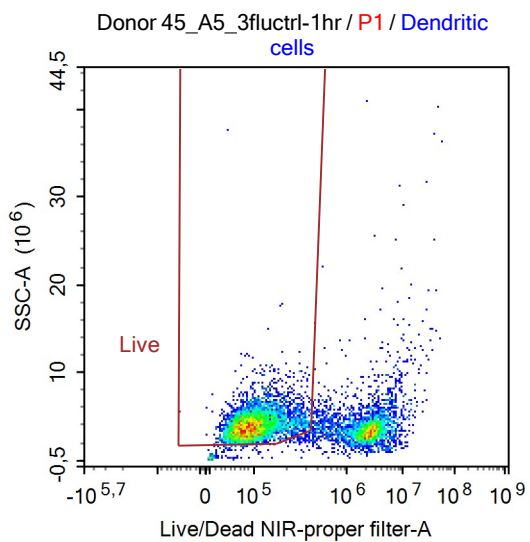

| Gate            | Count | % Dendritic cells |
|-----------------|-------|-------------------|
| Dendritic cells | 9.429 | 100,00%           |
| Live            | 6.119 | 64,90%            |

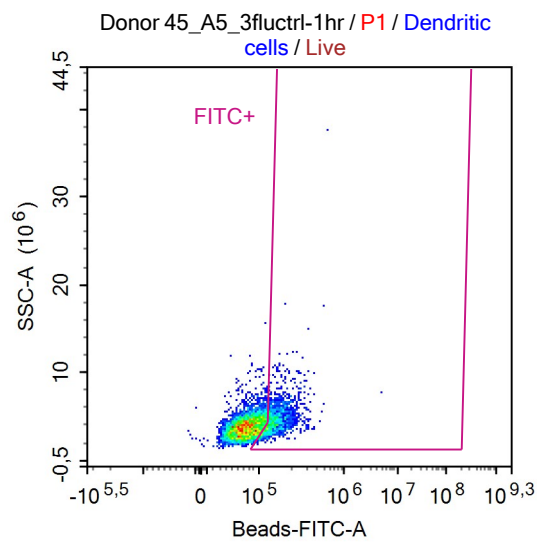

| Gate  | Count | % Live  |
|-------|-------|---------|
| Live  | 6.119 | 100,00% |
| FITC+ | 1.292 | 21,11%  |

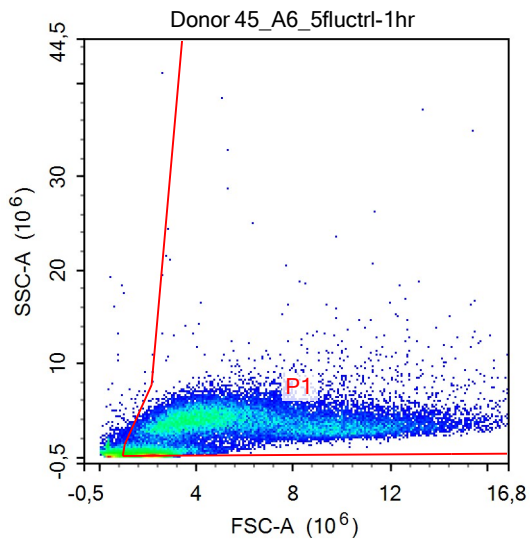

| Gate | Count  | % All   |
|------|--------|---------|
| All  | 55.318 | 100,00% |
| P1   | 42.654 | 77,11%  |

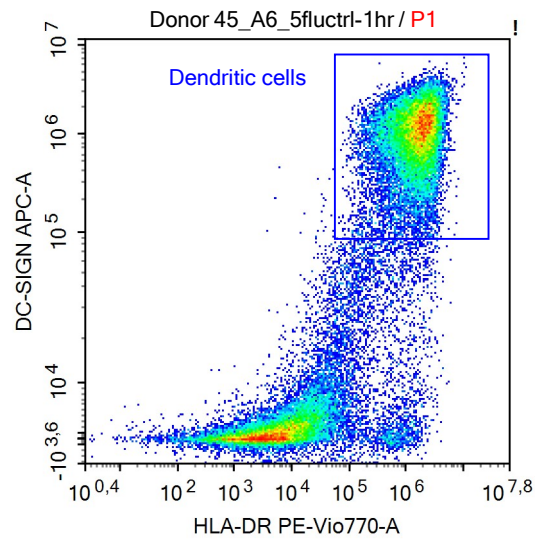

| Gate            | Count  | % P1    |
|-----------------|--------|---------|
| P1              | 42.654 | 100,00% |
| Dendritic cells | 20.355 | 47,72%  |

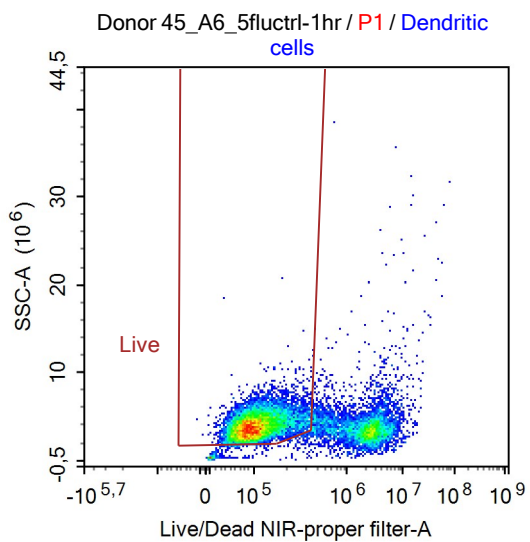

| Gate            | Count  | % Dendritic cells |
|-----------------|--------|-------------------|
| Dendritic cells | 20.355 | 100,00%           |
| Live            | 14.129 | 69,41%            |

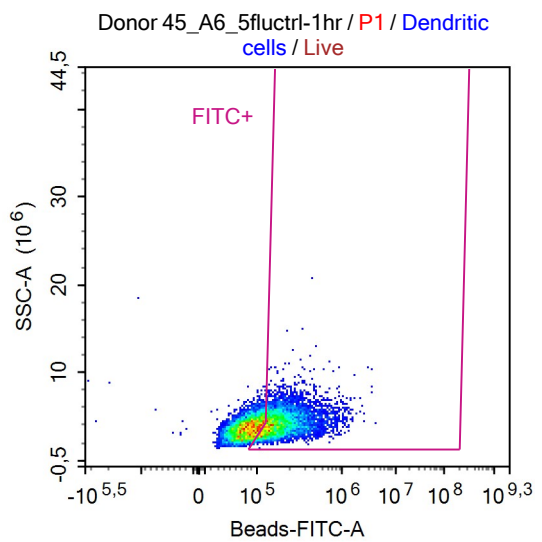

| Gate  | Count  | % Live  |
|-------|--------|---------|
| Live  | 14.129 | 100,00% |
| FITC+ | 6.309  | 44,65%  |

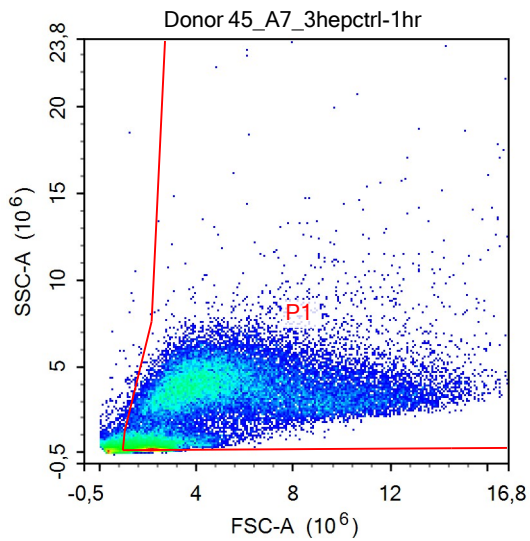

| Gate | Count  | % All   |
|------|--------|---------|
| All  | 67.630 | 100,00% |
| P1   | 53.241 | 78,72%  |

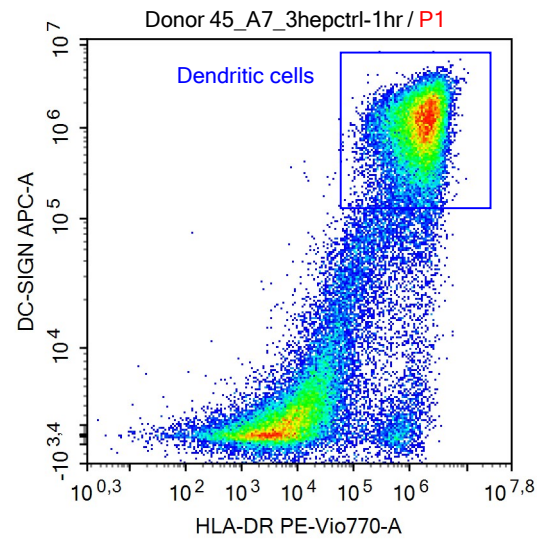

| Gate            | Count  | % P1    |
|-----------------|--------|---------|
| P1              | 53.241 | 100,00% |
| Dendritic cells | 22.047 | 41,41%  |

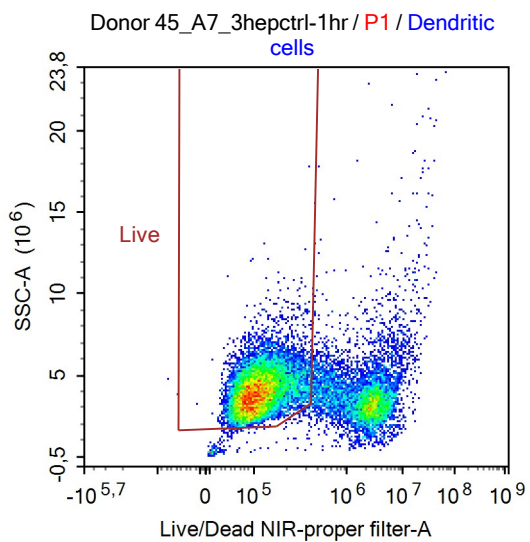

| Gate            | Count  | % Dendritic cells |
|-----------------|--------|-------------------|
| Dendritic cells | 22.047 | 100,00%           |
| Live            | 14.856 | 67,38%            |

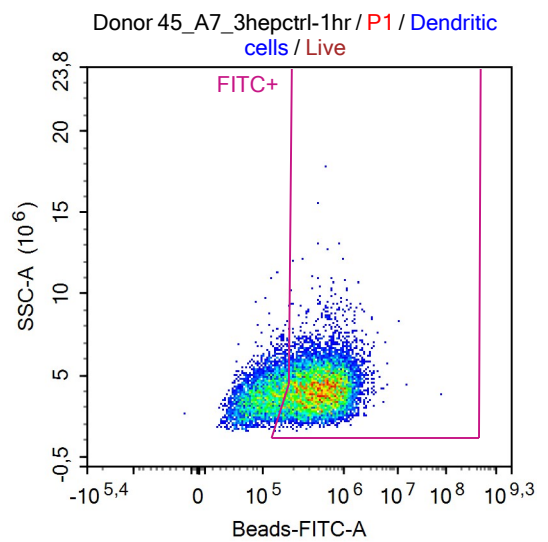

| Gate  | Count  | % Live  |
|-------|--------|---------|
| Live  | 14.856 | 100,00% |
| FITC+ | 10.125 | 68,15%  |

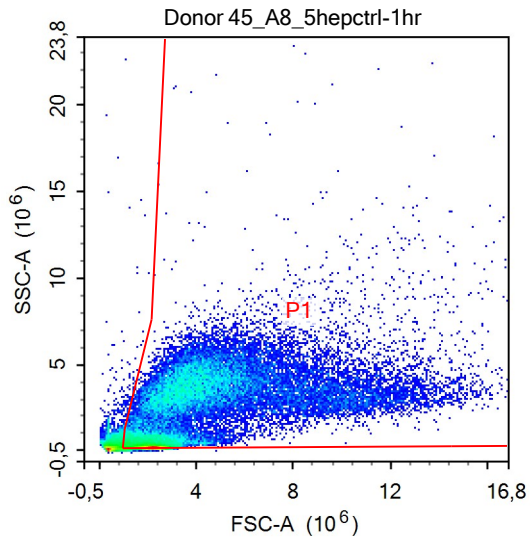

| Gate | Count  | % All   |
|------|--------|---------|
| All  | 65.869 | 100,00% |
| P1   | 48.764 | 74,03%  |

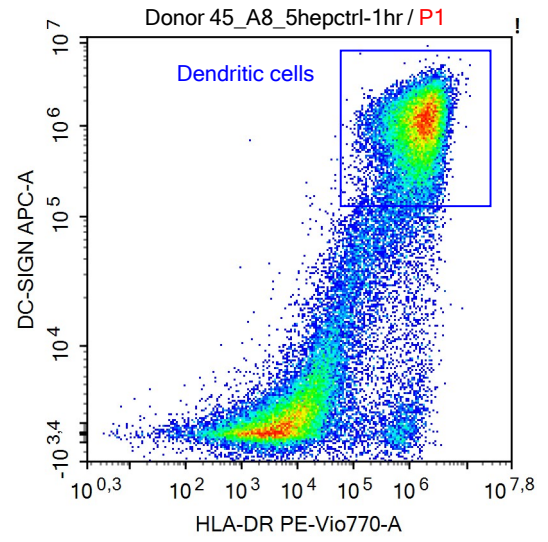

| Gate            | Count  | % P1    |
|-----------------|--------|---------|
| P1              | 48.764 | 100,00% |
| Dendritic cells | 18.714 | 38,38%  |

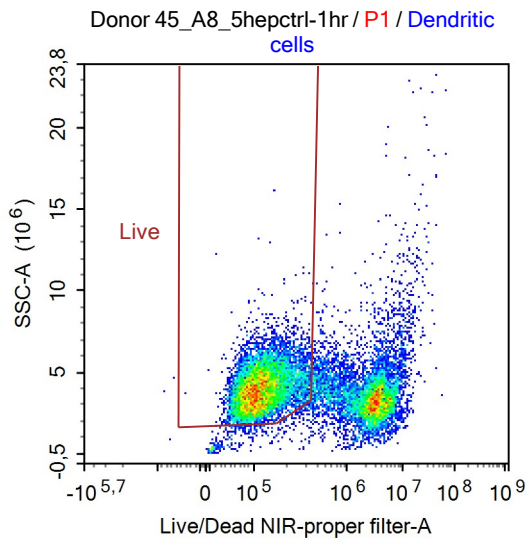

| Gate            | Count  | % Dendritic cells |
|-----------------|--------|-------------------|
| Dendritic cells | 18.714 | 100,00%           |
| Live            | 10.744 | 57,41%            |

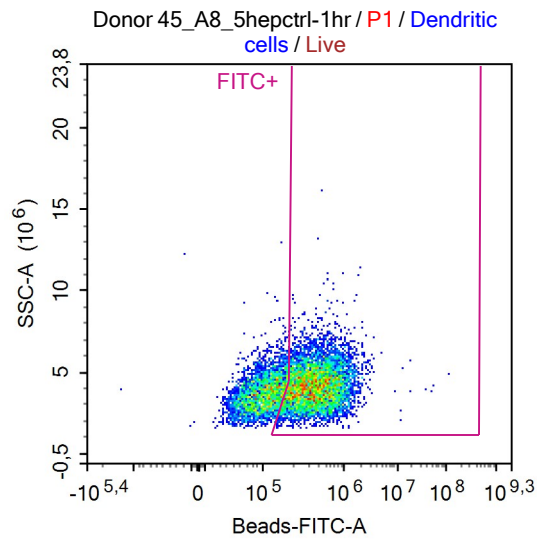

| Gate  | Count  | % Live  |
|-------|--------|---------|
| Live  | 10.744 | 100,00% |
| FITC+ | 6.749  | 62,82%  |



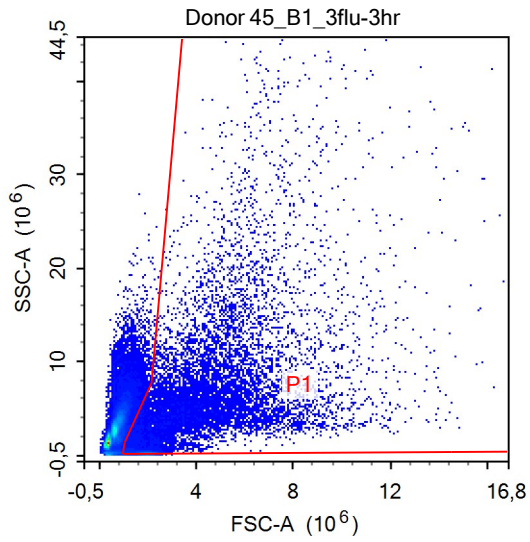

| Gate | Count   | % All   |
|------|---------|---------|
| All  | 314.426 | 100,00% |
| P1   | 16.694  | 5,31%   |

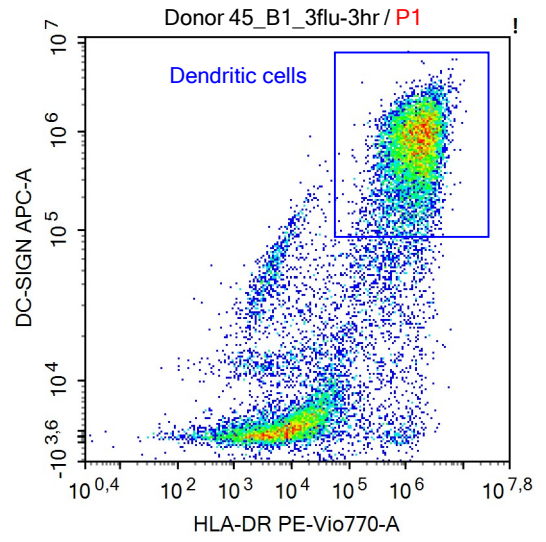

| Gate            | Count  | % P1    |
|-----------------|--------|---------|
| P1              | 16.694 | 100,00% |
| Dendritic cells | 7.790  | 46,66%  |

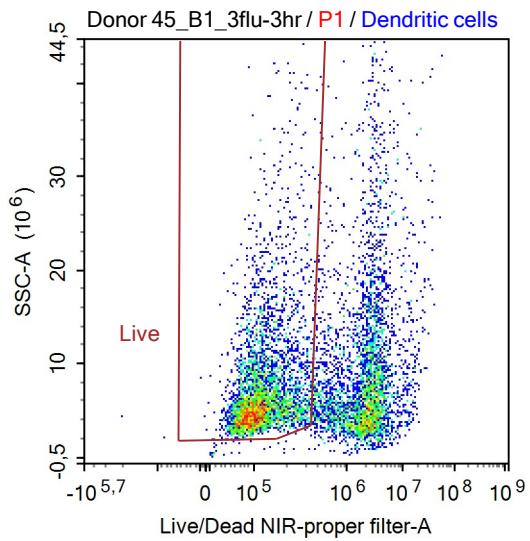

| Gate            | Count | % Dendritic cells |
|-----------------|-------|-------------------|
| Dendritic cells | 7.790 | 100,00%           |
| Live            | 4.099 | 52,62%            |

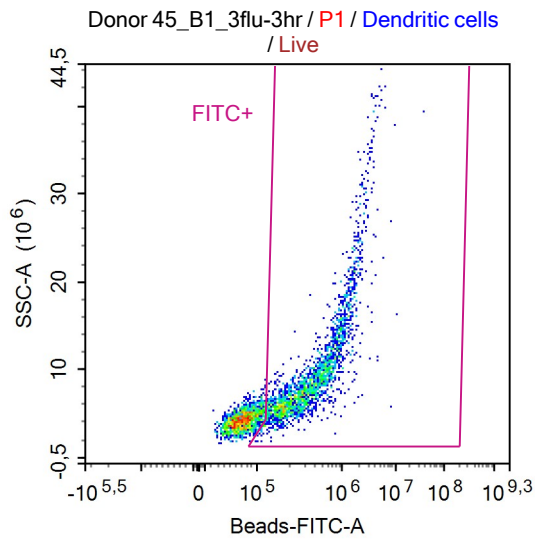

| Gate  | Count | % Live  |
|-------|-------|---------|
| Live  | 4.099 | 100,00% |
| FITC+ | 2.377 | 57,99%  |

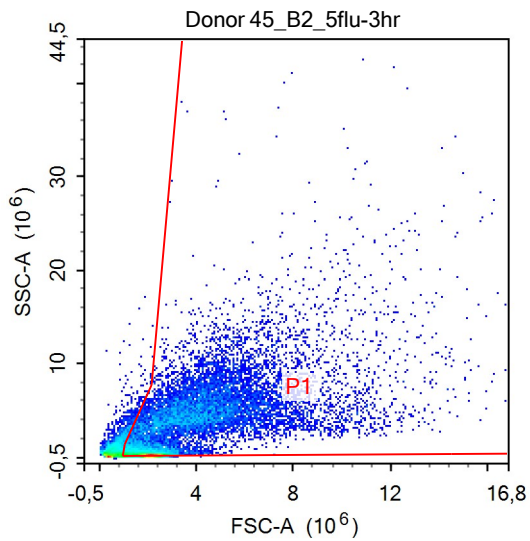

| Gate | Count  | % All   |
|------|--------|---------|
| All  | 45.411 | 100,00% |
| P1   | 30.479 | 67,12%  |

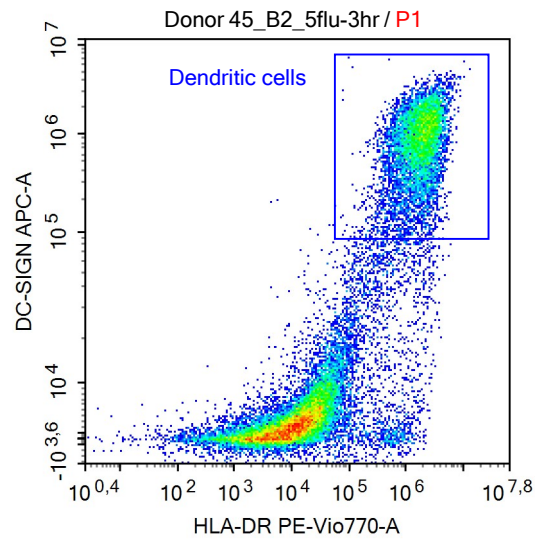

| Gate            | Count  | % P1    |
|-----------------|--------|---------|
| P1              | 30.479 | 100,00% |
| Dendritic cells | 8.129  | 26,67%  |

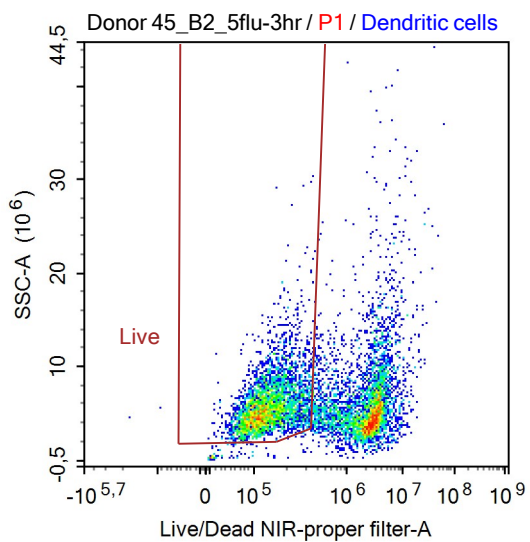

| Gate            | Count | % Dendritic cells |
|-----------------|-------|-------------------|
| Dendritic cells | 8.129 | 100,00%           |
| Live            | 3.915 | 48,16%            |

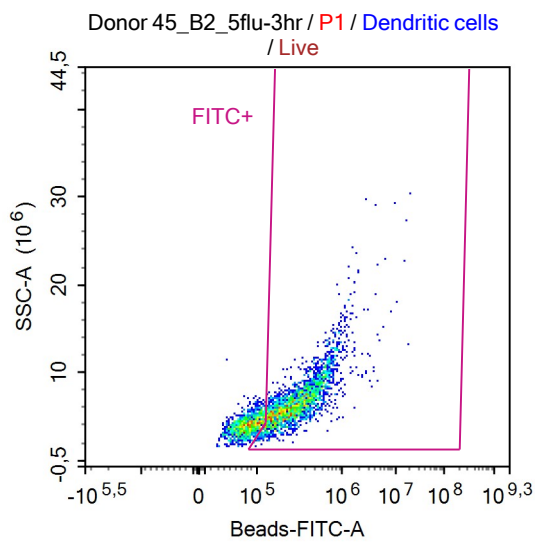

| Gate  | Count | % Live  |
|-------|-------|---------|
| Live  | 3.915 | 100,00% |
| FITC+ | 2.610 | 66,67%  |

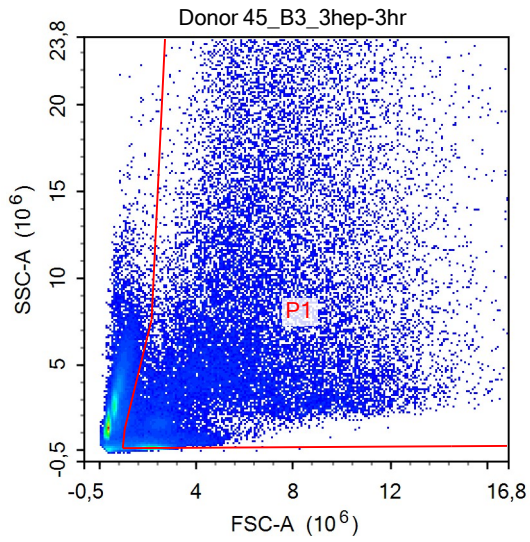

| Gate | Count   | % All   |
|------|---------|---------|
| All  | 348.419 | 100,00% |
| P1   | 65.222  | 18,72%  |

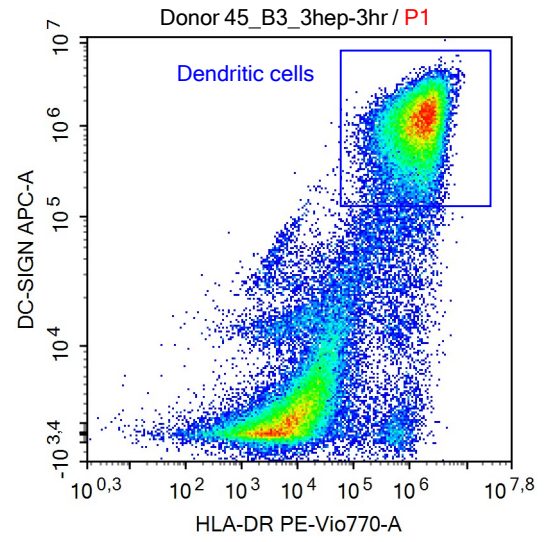

| Gate            | Count  | % P1    |
|-----------------|--------|---------|
| P1              | 65.222 | 100,00% |
| Dendritic cells | 25.798 | 39,55%  |

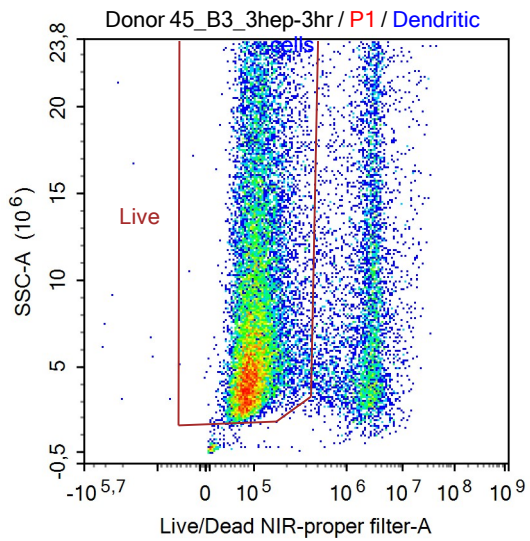

| Gate            | Count  | % Dendritic cells |
|-----------------|--------|-------------------|
| Dendritic cells | 25.798 | 100,00%           |
| Live            | 18.854 | 73,08%            |

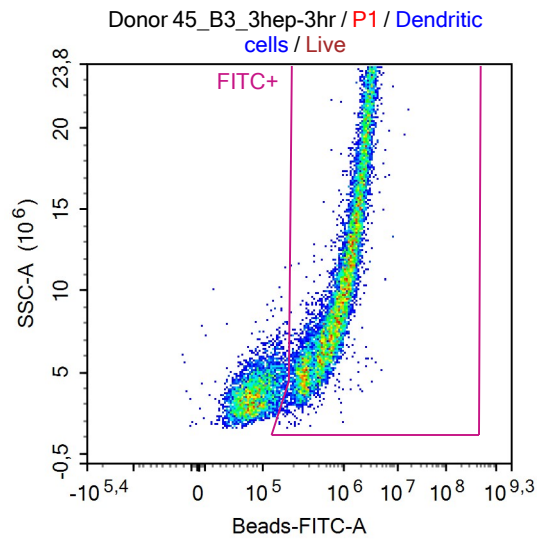

| Gate  | Count  | % Live  |
|-------|--------|---------|
| Live  | 18.854 | 100,00% |
| FITC+ | 14.750 | 78,23%  |

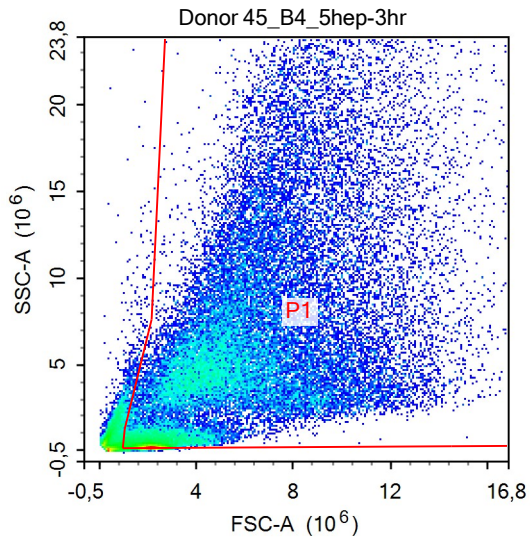

| Gate | Count  | % All   |
|------|--------|---------|
| All  | 89.918 | 100,00% |
| P1   | 68.731 | 76,44%  |

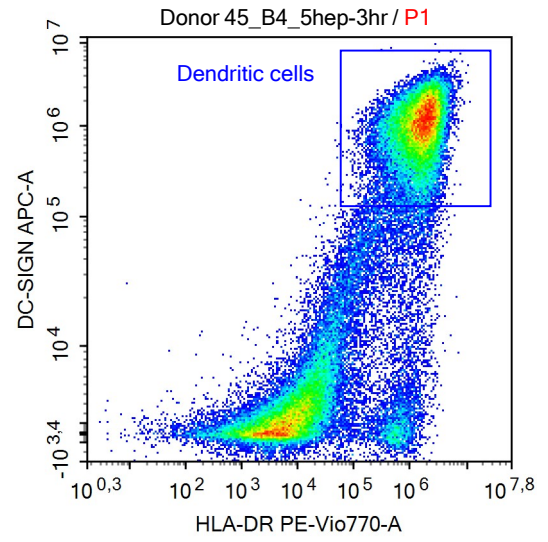

| Gate            | Count  | % P1    |
|-----------------|--------|---------|
| P1              | 68.731 | 100,00% |
| Dendritic cells | 29.267 | 42,58%  |

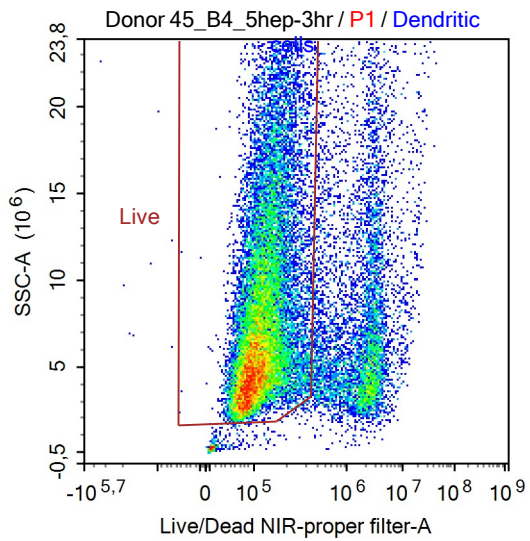

| Gate            | Count  | % Dendritic cells |
|-----------------|--------|-------------------|
| Dendritic cells | 29.267 | 100,00%           |
| Live            | 22.091 | 75,48%            |

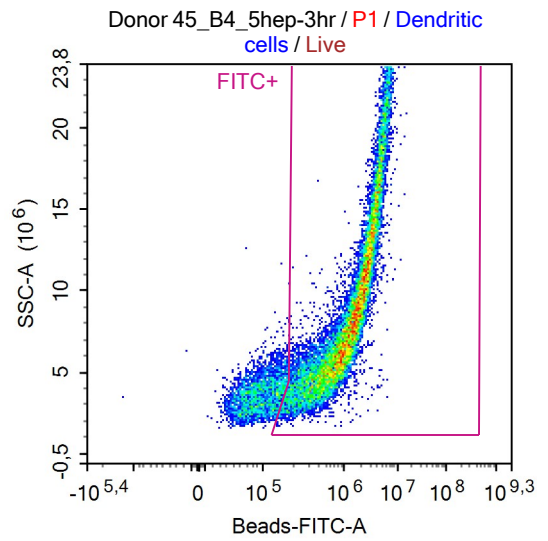

| Gate  | Count  | % Live  |
|-------|--------|---------|
| Live  | 22.091 | 100,00% |
| FITC+ | 18.467 | 83,60%  |



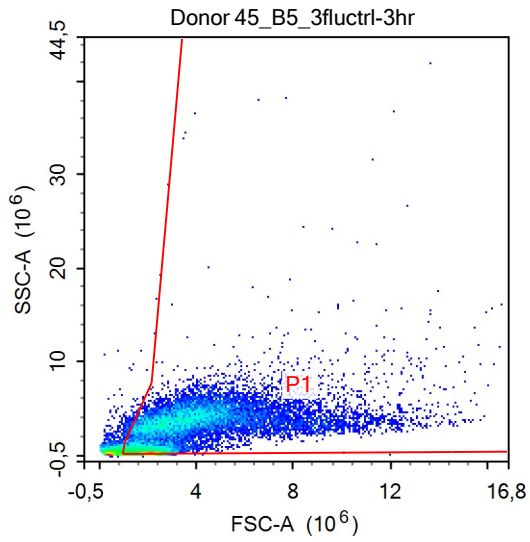

| Gate | Count  | % All   |
|------|--------|---------|
| All  | 34.181 | 100,00% |
| P1   | 23.479 | 68,69%  |

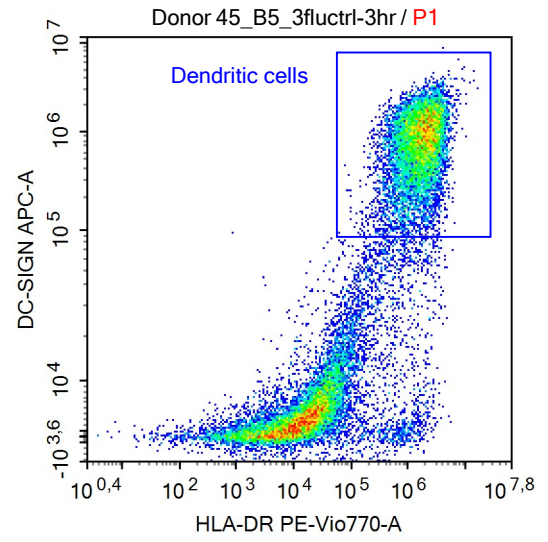

| Gate            | Count  | % P1    |
|-----------------|--------|---------|
| P1              | 23.479 | 100,00% |
| Dendritic cells | 9.465  | 40,31%  |

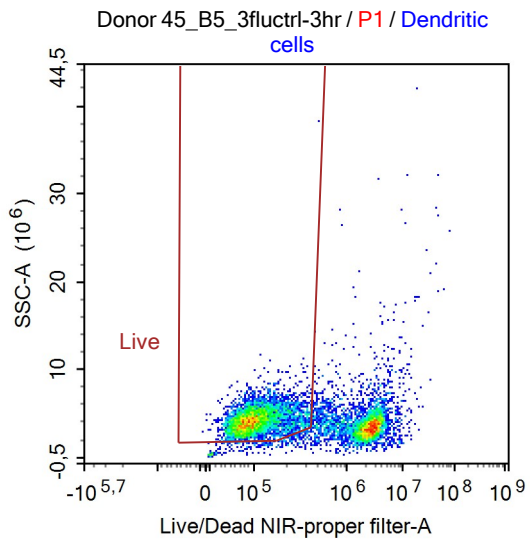

| Gate            | Count | % Dendritic cells |
|-----------------|-------|-------------------|
| Dendritic cells | 9.465 | 100,00%           |
| Live            | 5.183 | 54,76%            |

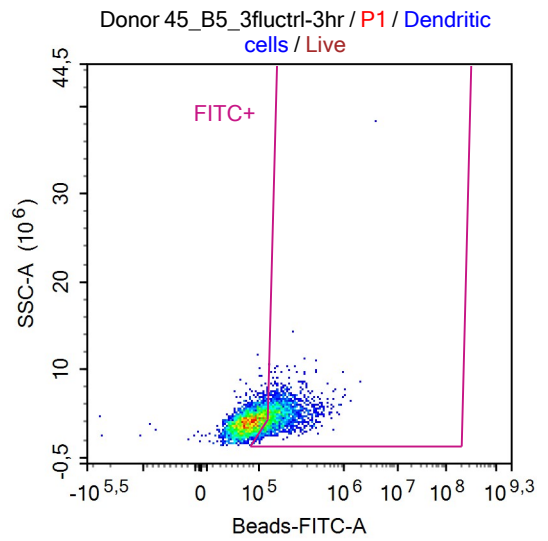

| Gate  | Count | % Live  |
|-------|-------|---------|
| Live  | 5.183 | 100,00% |
| FITC+ | 1.507 | 29,08%  |

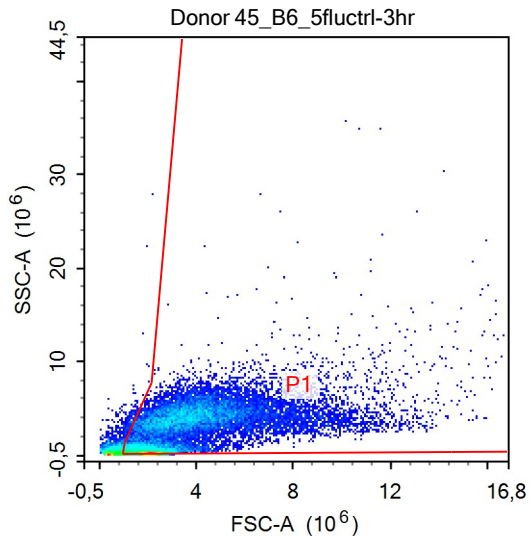

| Gate | Count  | % All   |
|------|--------|---------|
| All  | 54.659 | 100,00% |
| P1   | 39.417 | 72,11%  |

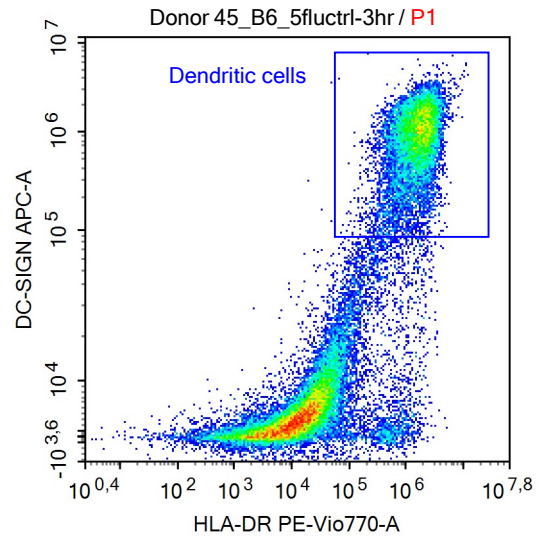

| Gate            | Count  | % P1    |
|-----------------|--------|---------|
| P1              | 39.417 | 100,00% |
| Dendritic cells | 11.879 | 30,14%  |

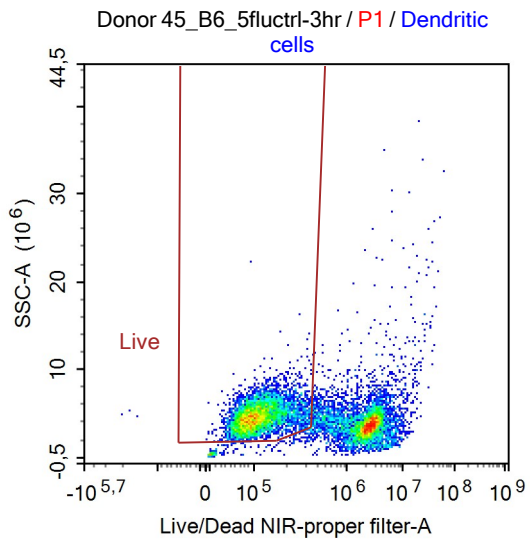

| Gate            | Count  | % Dendritic cells |
|-----------------|--------|-------------------|
| Dendritic cells | 11.879 | 100,00%           |
| Live            | 6.087  | 51,24%            |

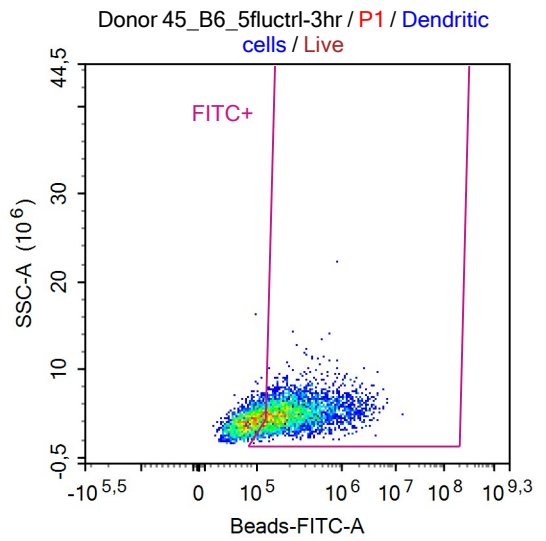

| Gate  | Count | % Live  |
|-------|-------|---------|
| Live  | 6.087 | 100,00% |
| FITC+ | 3.681 | 60,47%  |

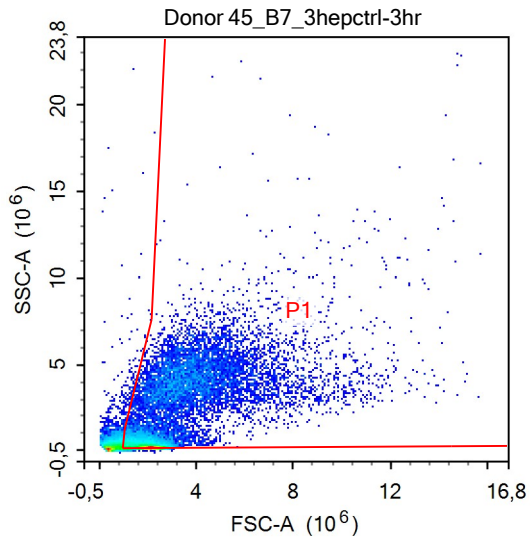

| Gate | Count  | % All   |
|------|--------|---------|
| All  | 41.946 | 100,00% |
| P1   | 28.192 | 67,21%  |

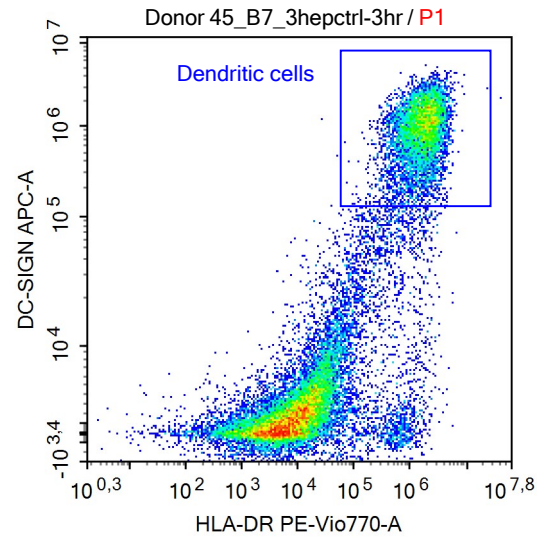

| Gate            | Count  | % P1    |
|-----------------|--------|---------|
| P1              | 28.192 | 100,00% |
| Dendritic cells | 6.570  | 23,30%  |

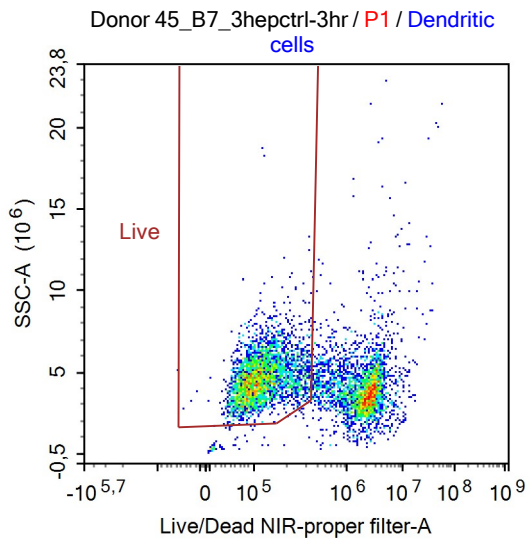

| Gate            | Count | % Dendritic cells |
|-----------------|-------|-------------------|
| Dendritic cells | 6.570 | 100,00%           |
| Live            | 3.481 | 52,98%            |

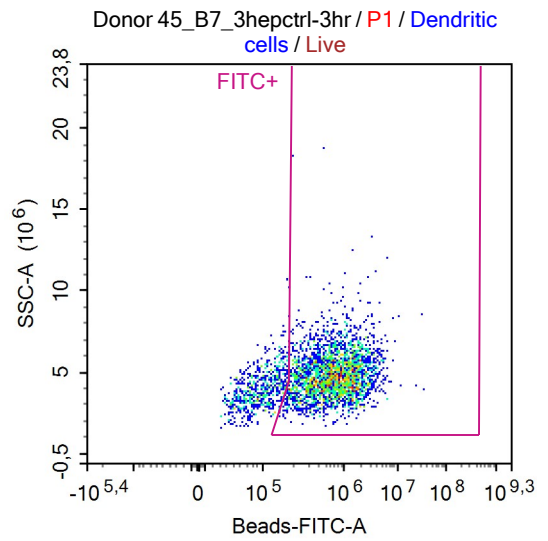

| Gate  | Count | % Live  |
|-------|-------|---------|
| Live  | 3.481 | 100,00% |
| FITC+ | 2.762 | 79,35%  |

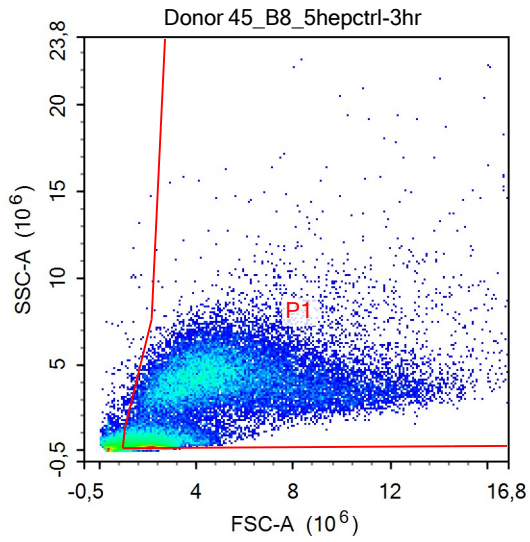

| Gate | Count  | % All   |
|------|--------|---------|
| All  | 71.063 | 100,00% |
| P1   | 54.349 | 76,48%  |

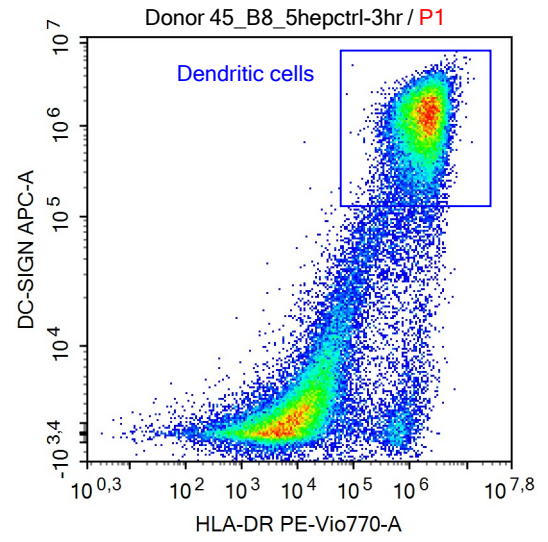

| Gate            | Count  | % P1    |
|-----------------|--------|---------|
| P1              | 54.349 | 100,00% |
| Dendritic cells | 19.920 | 36,65%  |

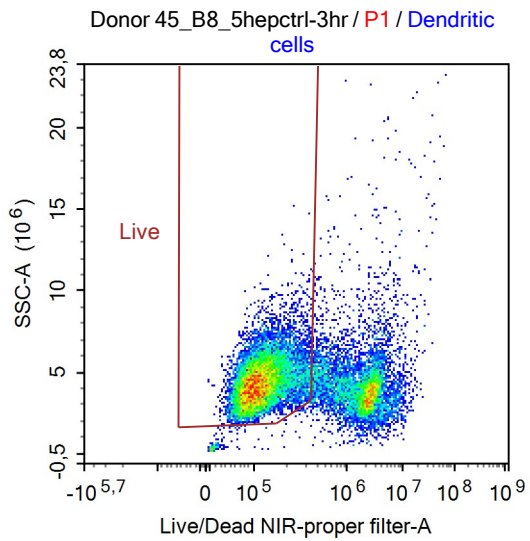

| Gate            | Count  | % Dendritic cells |
|-----------------|--------|-------------------|
| Dendritic cells | 19.920 | 100,00%           |
| Live            | 12.569 | 63,10%            |

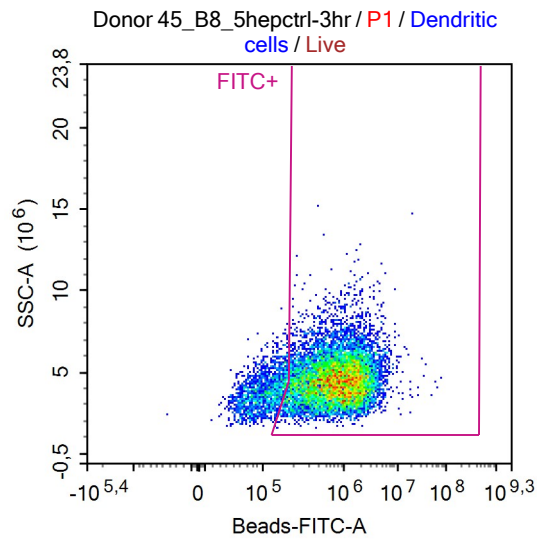

| Gate  | Count  | % Live  |
|-------|--------|---------|
| Live  | 12.569 | 100,00% |
| FITC+ | 10.696 | 85,10%  |



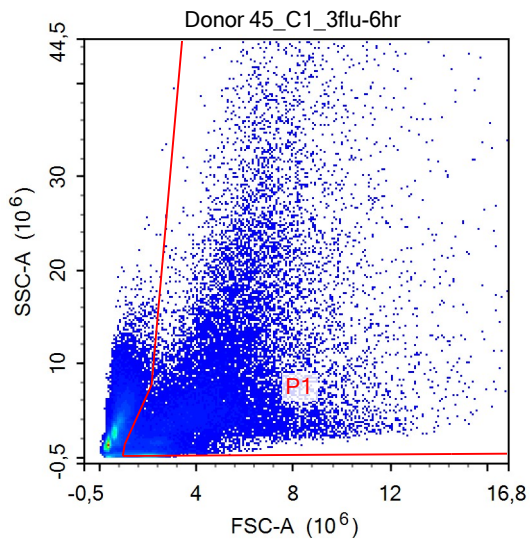

| Gate | Count   | % All   |
|------|---------|---------|
| All  | 461.055 | 100,00% |
| P1   | 58.808  | 12,76%  |

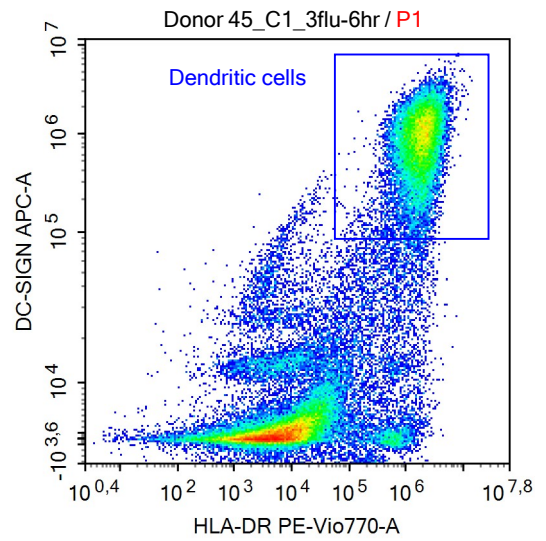

| Gate            | Count  | % P1    |
|-----------------|--------|---------|
| P1              | 58.808 | 100,00% |
| Dendritic cells | 18.077 | 30,74%  |

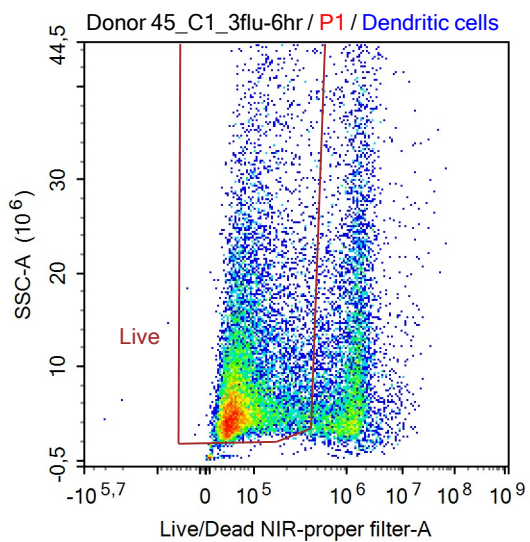

| Gate            | Count  | % Dendritic cells |
|-----------------|--------|-------------------|
| Dendritic cells | 18.077 | 100,00%           |
| Live            | 12.152 | 67,22%            |

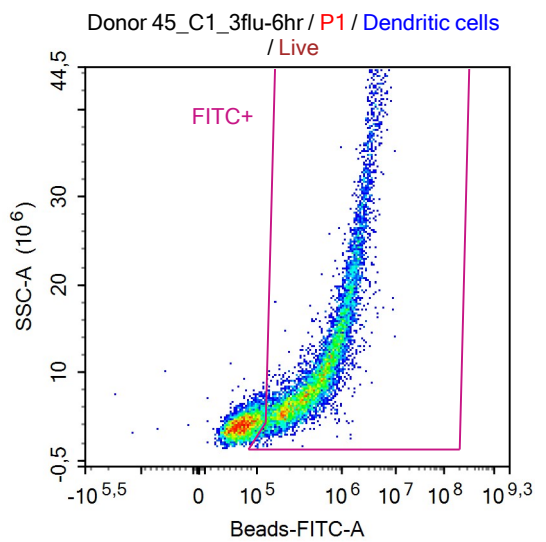

| Gate  | Count  | % Live  |
|-------|--------|---------|
| Live  | 12.152 | 100,00% |
| FITC+ | 8.371  | 68,89%  |

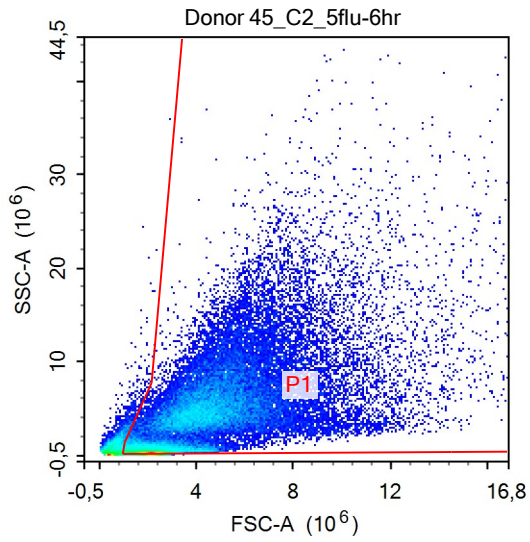

| Gate | Count   | % All   |
|------|---------|---------|
| All  | 119.545 | 100,00% |
| P1   | 89.176  | 74,60%  |

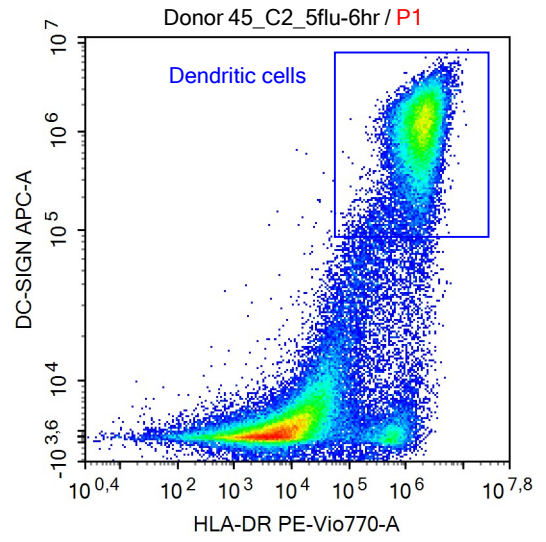

| Gate            | Count  | % P1    |
|-----------------|--------|---------|
| P1              | 89.176 | 100,00% |
| Dendritic cells | 25.987 | 29,14%  |

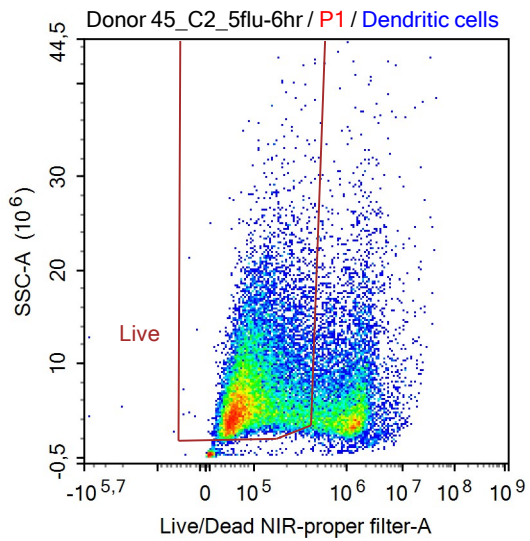

| Gate            | Count  | % Dendritic cells |
|-----------------|--------|-------------------|
| Dendritic cells | 25.987 | 100,00%           |
| Live            | 17.672 | 68,00%            |

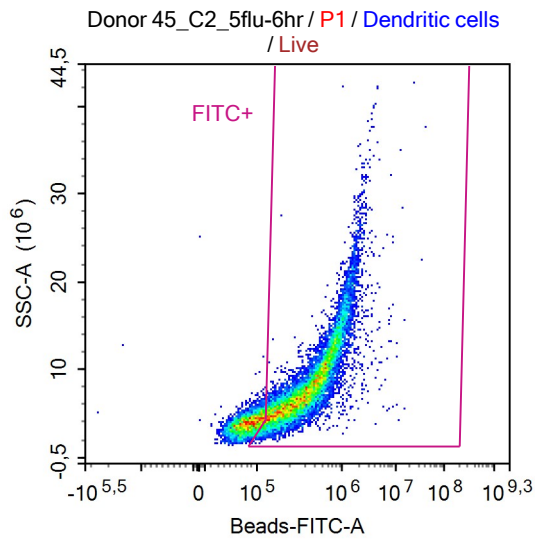

| Gate  | Count  | % Live  |
|-------|--------|---------|
| Live  | 17.672 | 100,00% |
| FITC+ | 13.170 | 74,52%  |

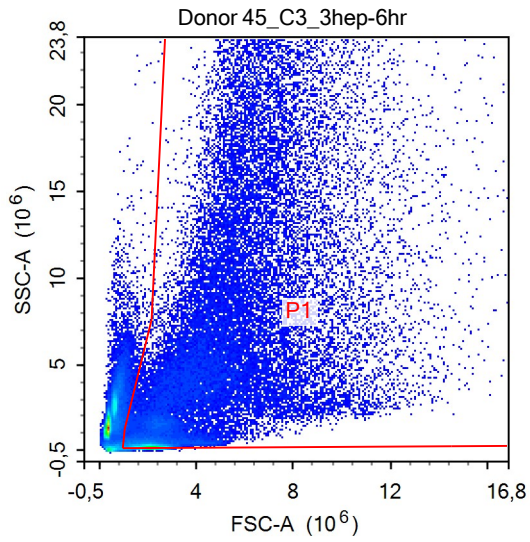

| Gate | Count   | % All   |
|------|---------|---------|
| All  | 343.838 | 100,00% |
| P1   | 100.836 | 29,33%  |

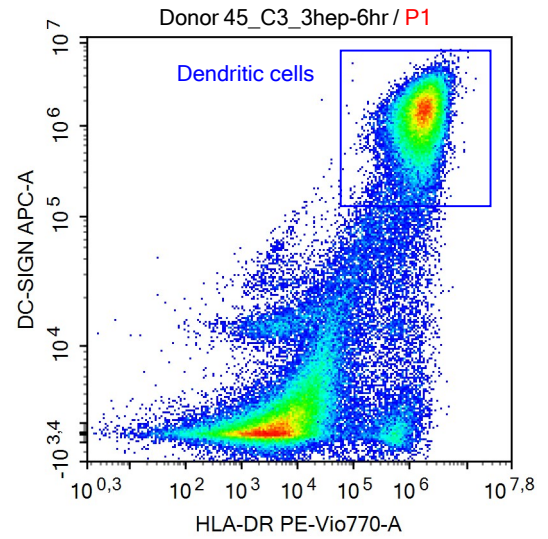

| Gate            | Count   | % P1    |
|-----------------|---------|---------|
| P1              | 100.836 | 100,00% |
| Dendritic cells | 31.867  | 31,60%  |

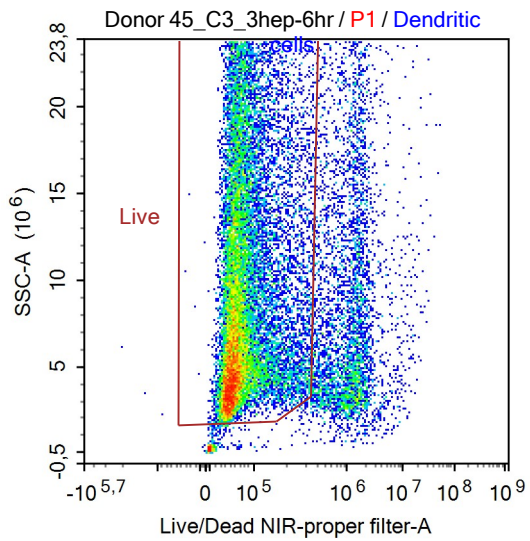

| Gate            | Count  | % Dendritic cells |
|-----------------|--------|-------------------|
| Dendritic cells | 31.867 | 100,00%           |
| Live            | 25.633 | 80,44%            |

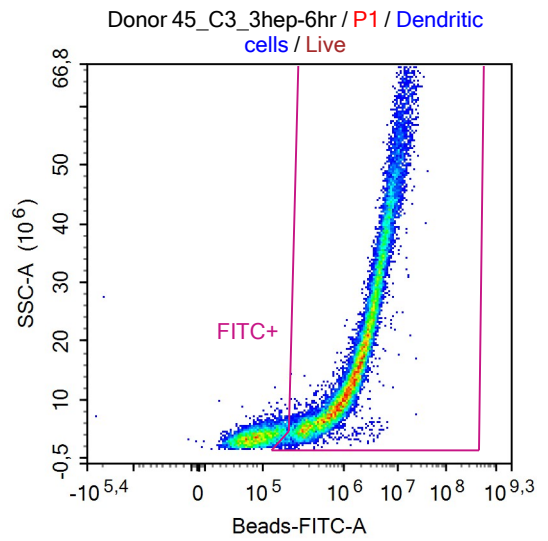

| Gate  | Count  | % Live  |
|-------|--------|---------|
| Live  | 25.633 | 100,00% |
| FITC+ | 20.873 | 81,43%  |

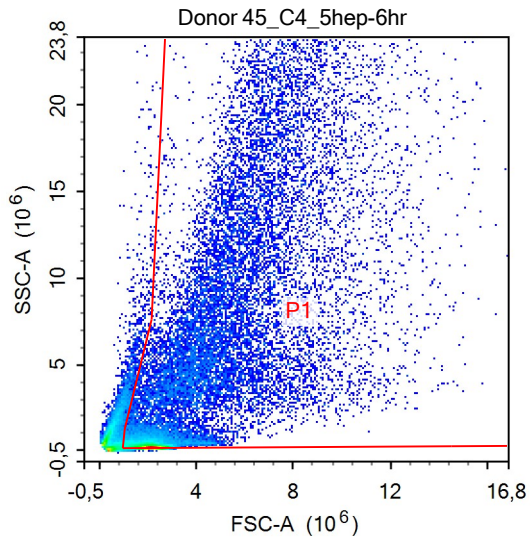

| Gate | Count  | % All   |
|------|--------|---------|
| All  | 91.153 | 100,00% |
| P1   | 61.937 | 67,95%  |

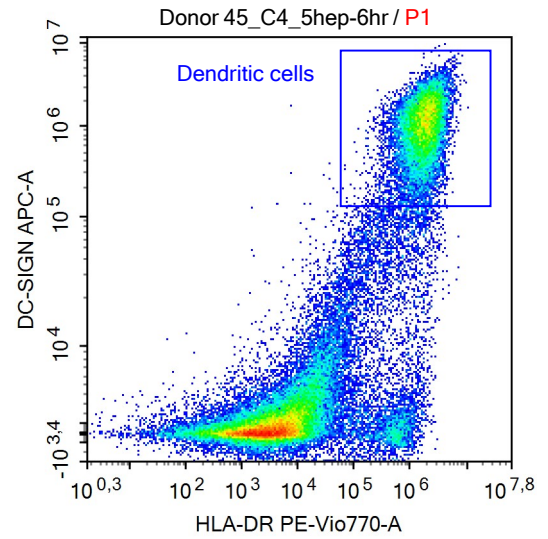

| Gate            | Count  | % P1    |
|-----------------|--------|---------|
| P1              | 61.937 | 100,00% |
| Dendritic cells | 14.810 | 23,91%  |

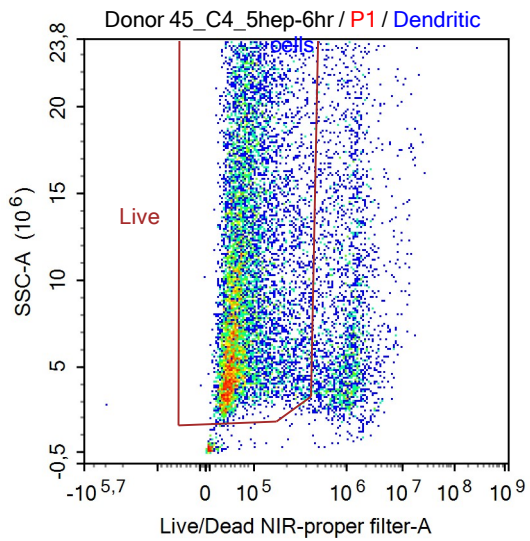

| Gate            | Count  | % Dendritic cells |
|-----------------|--------|-------------------|
| Dendritic cells | 14.810 | 100,00%           |
| Live            | 11.807 | 79,72%            |

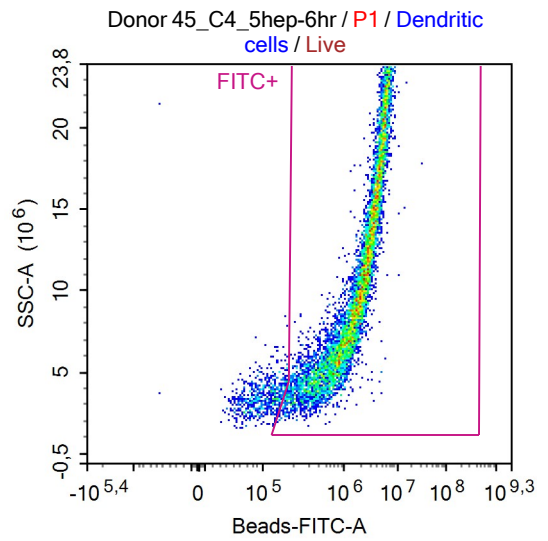

| Gate  | Count  | % Live  |
|-------|--------|---------|
| Live  | 11.807 | 100,00% |
| FITC+ | 11.068 | 93,74%  |



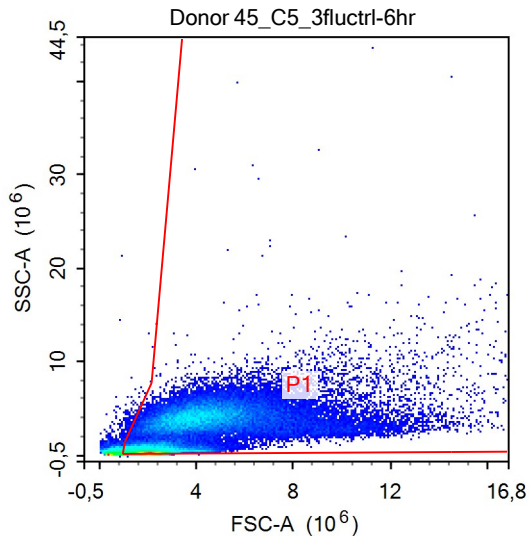

| Gate | Count   | % All   |
|------|---------|---------|
| All  | 125.277 | 100,00% |
| P1   | 98.794  | 78,86%  |

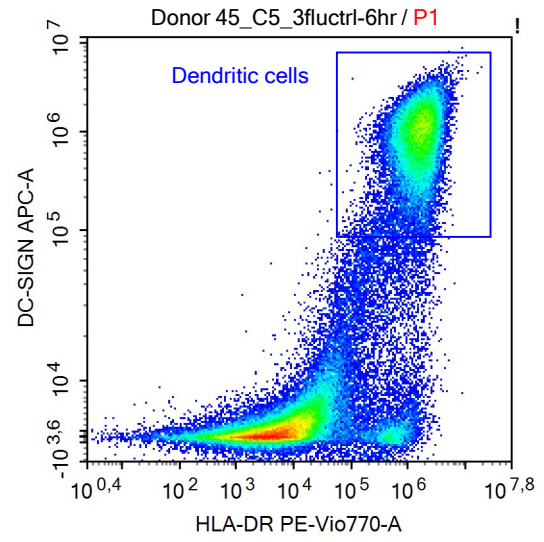

| Gate            | Count  | % P1    |
|-----------------|--------|---------|
| P1              | 98.794 | 100,00% |
| Dendritic cells | 27.648 | 27,99%  |

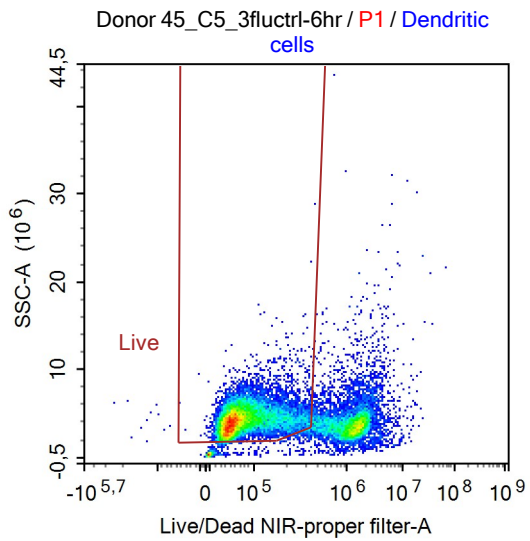

| Gate            | Count  | % Dendritic cells |
|-----------------|--------|-------------------|
| Dendritic cells | 27.648 | 100,00%           |
| Live            | 18.815 | 68,05%            |

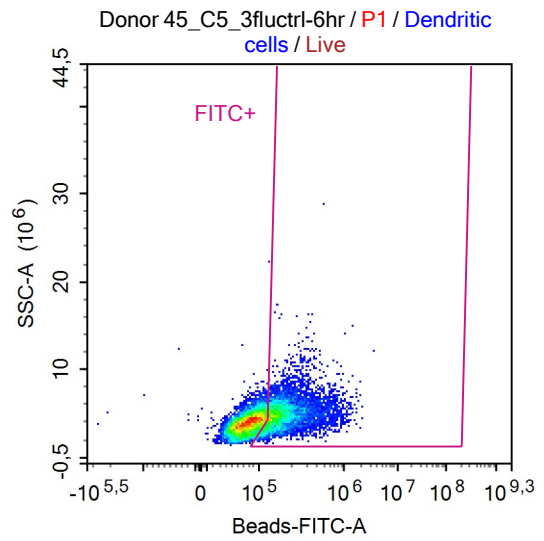

| Gate  | Count  | % Live  |
|-------|--------|---------|
| Live  | 18.815 | 100,00% |
| FITC+ | 6.847  | 36,39%  |

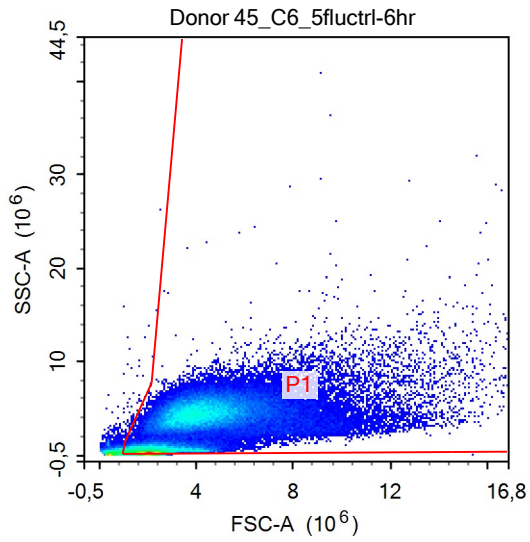

| Gate | Count   | % All   |
|------|---------|---------|
| All  | 183.402 | 100,00% |
| P1   | 155.454 | 84,76%  |

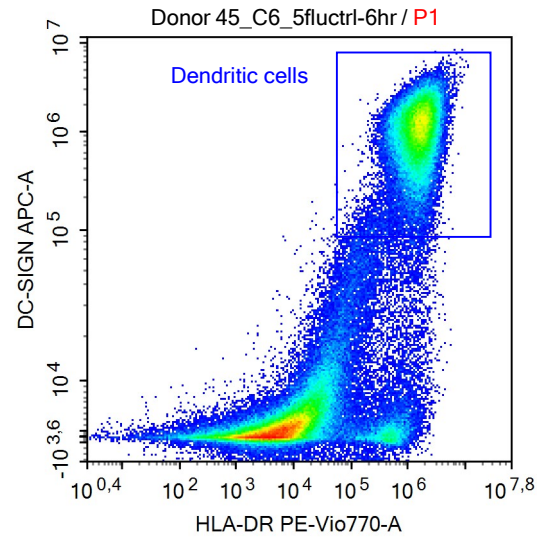

| Gate            | Count   | % P1    |
|-----------------|---------|---------|
| P1              | 155.454 | 100,00% |
| Dendritic cells | 48.181  | 30,99%  |

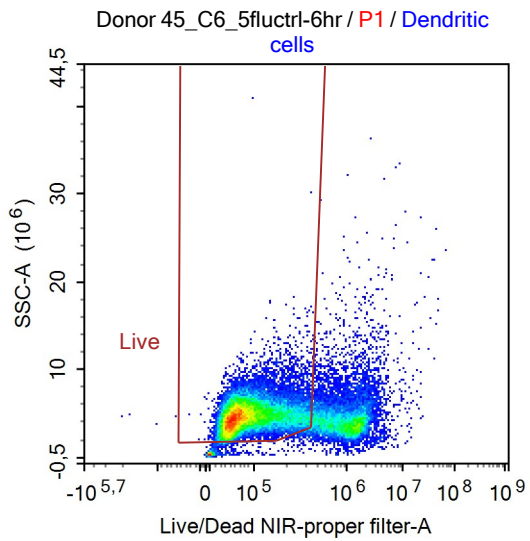

| Gate            | Count  | % Dendritic cells |
|-----------------|--------|-------------------|
| Dendritic cells | 48.181 | 100,00%           |
| Live            | 35.744 | 74,19%            |

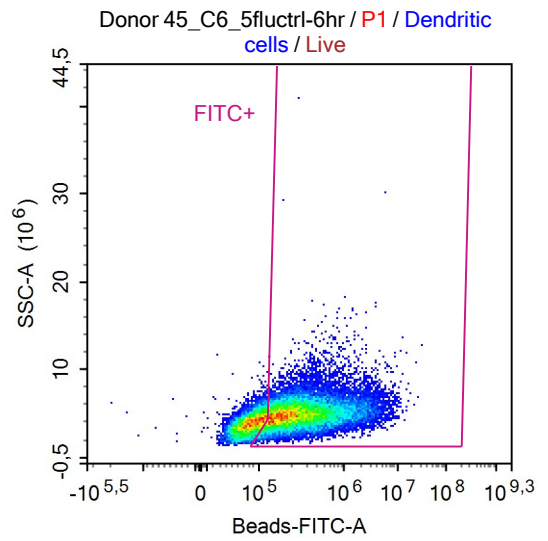

| Gate  | Count  | % Live  |
|-------|--------|---------|
| Live  | 35.744 | 100,00% |
| FITC+ | 24.773 | 69,31%  |

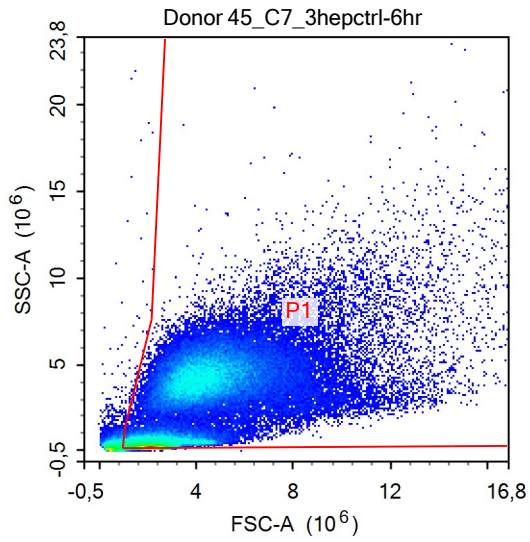

| Gate | Count   | % All   |
|------|---------|---------|
| All  | 201.753 | 100,00% |
| P1   | 165.124 | 81,84%  |

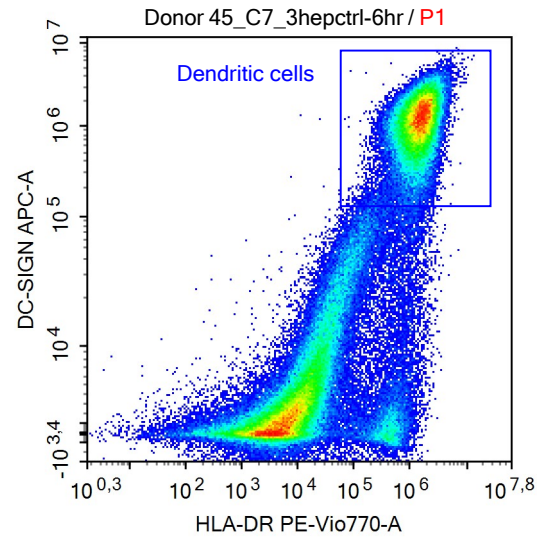

| Gate            | Count   | % P1    |
|-----------------|---------|---------|
| P1              | 165.124 | 100,00% |
| Dendritic cells | 51.255  | 31,04%  |

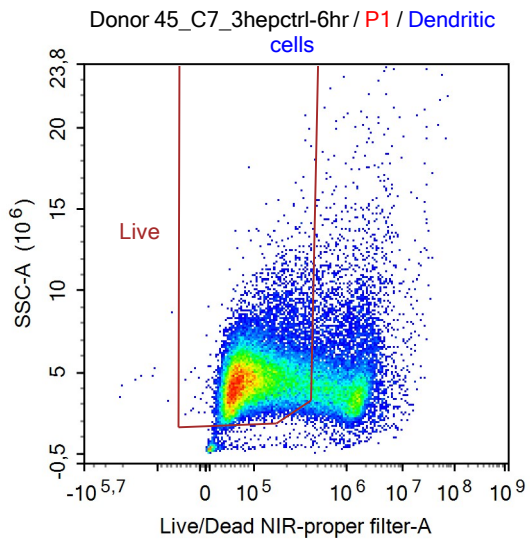

| Gate            | Count  | % Dendritic cells |
|-----------------|--------|-------------------|
| Dendritic cells | 51.255 | 100,00%           |
| Live            | 37.711 | 73,58%            |

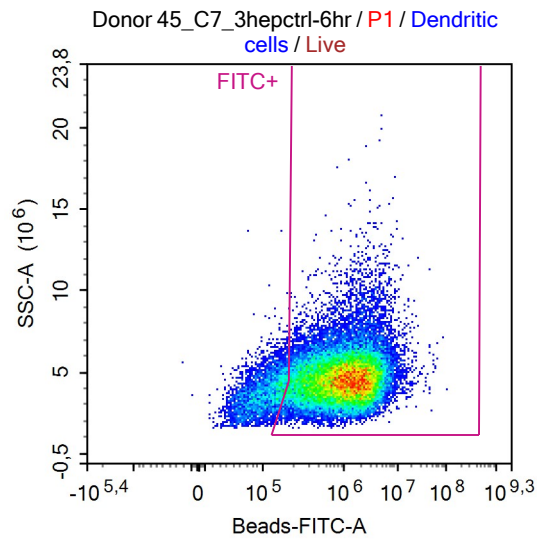

| Gate  | Count  | % Live  |
|-------|--------|---------|
| Live  | 37.711 | 100,00% |
| FITC+ | 33.023 | 87,57%  |

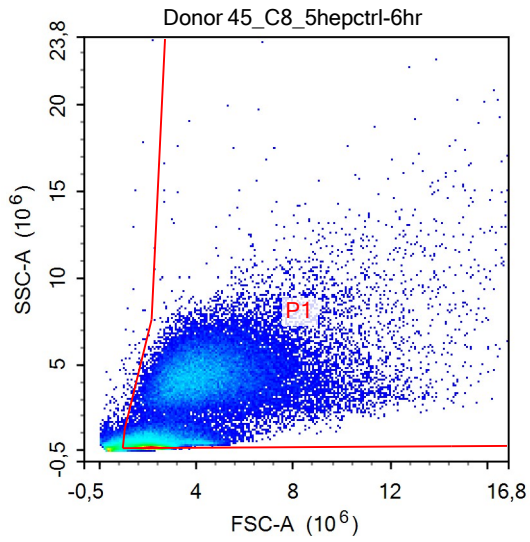

| Gate | Count   | % All   |
|------|---------|---------|
| All  | 142.112 | 100,00% |
| P1   | 114.231 | 80,38%  |

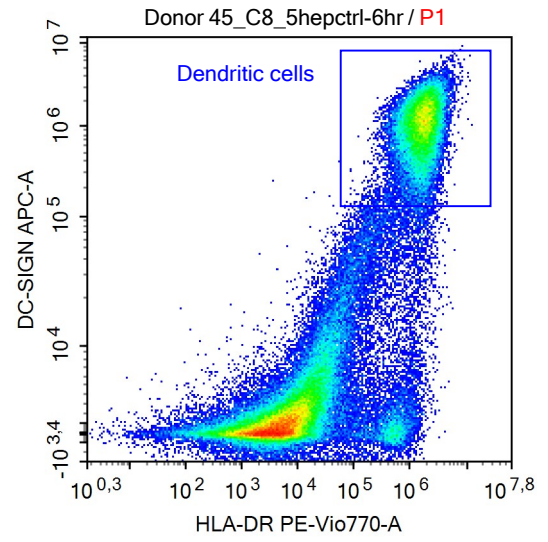

| Gate            | Count   | % P1    |
|-----------------|---------|---------|
| P1              | 114.231 | 100,00% |
| Dendritic cells | 26.579  | 23,27%  |

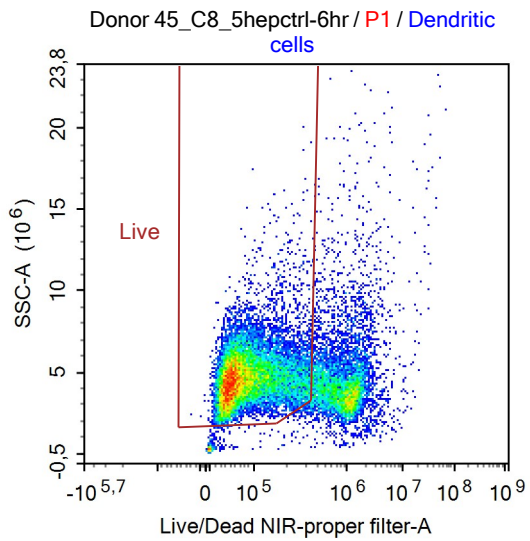

| Gate            | Count  | % Dendritic cells |
|-----------------|--------|-------------------|
| Dendritic cells | 26.579 | 100,00%           |
| Live            | 18.985 | 71,43%            |

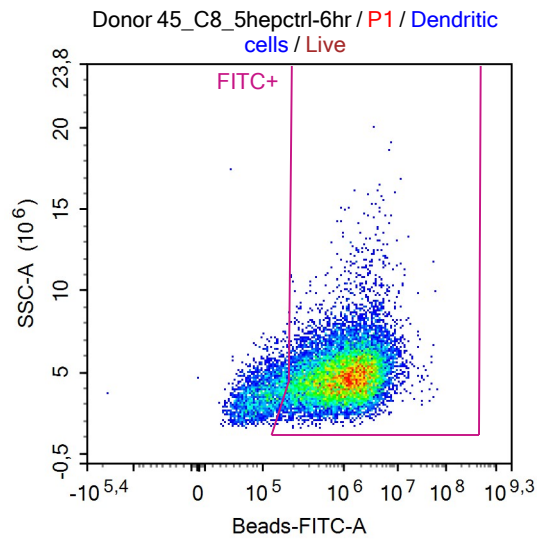

| Gate  | Count  | % Live  |
|-------|--------|---------|
| Live  | 18.985 | 100,00% |
| FITC+ | 16.368 | 86,22%  |



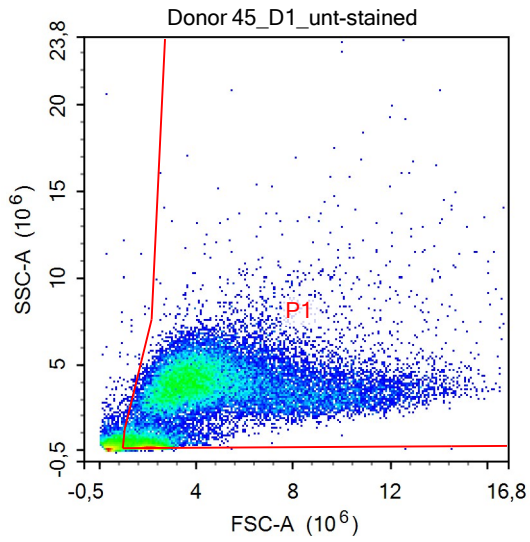

| Gate | Count  | % All   |
|------|--------|---------|
| All  | 42.856 | 100,00% |
| P1   | 32.674 | 76,24%  |

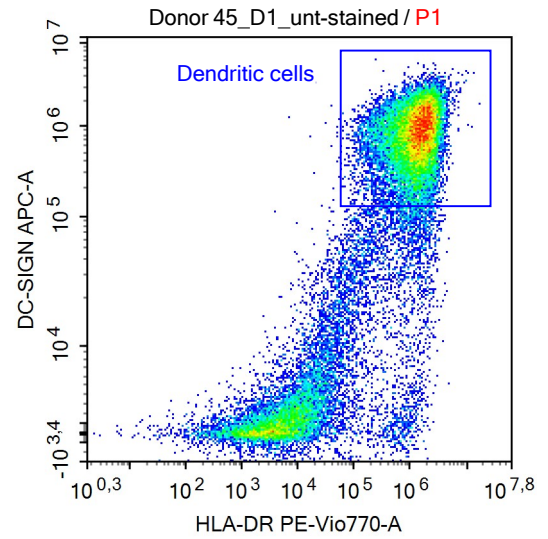

| Gate            | Count  | % P1    |
|-----------------|--------|---------|
| P1              | 32.674 | 100,00% |
| Dendritic cells | 18.440 | 56,44%  |

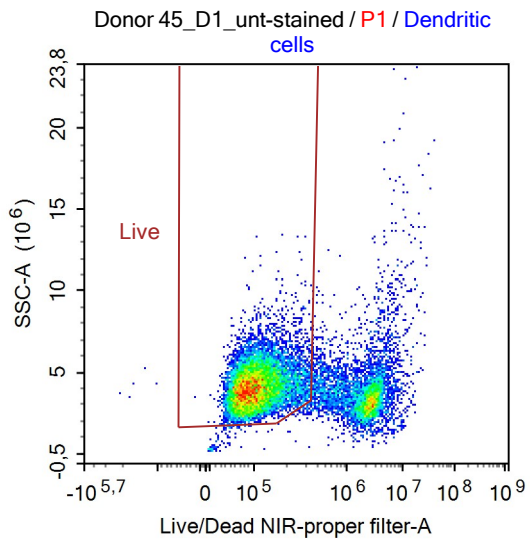

| Gate            | Count  | % Dendritic cells |
|-----------------|--------|-------------------|
| Dendritic cells | 18.440 | 100,00%           |
| Live            | 13.060 | 70,82%            |

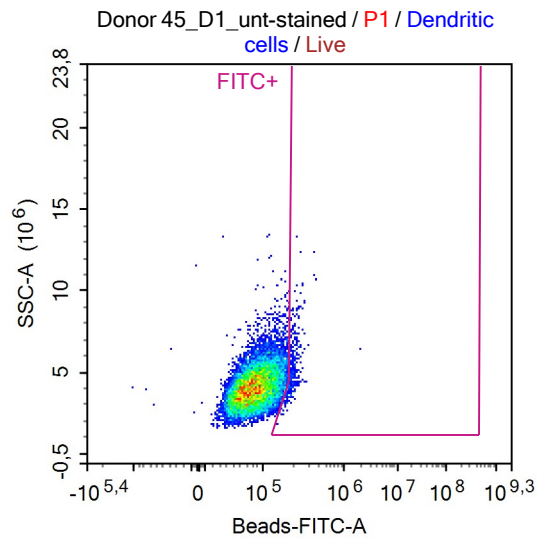

| Gate  | Count  | % Live  |
|-------|--------|---------|
| Live  | 13.060 | 100,00% |
| FITC+ | 248    | 1,90%   |

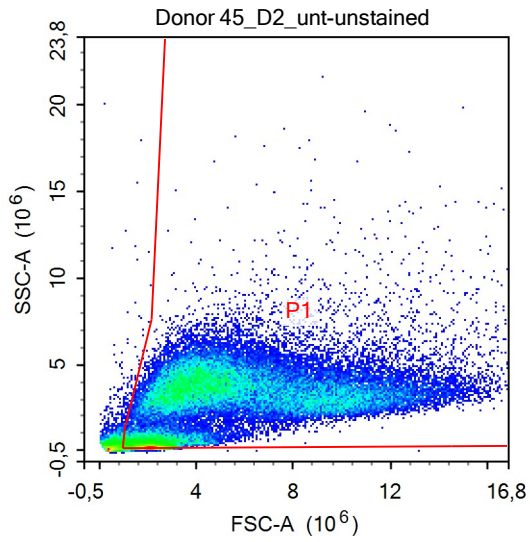

| Gate | Count  | % All   |
|------|--------|---------|
| All  | 81.005 | 100,00% |
| P1   | 65.904 | 81,36%  |

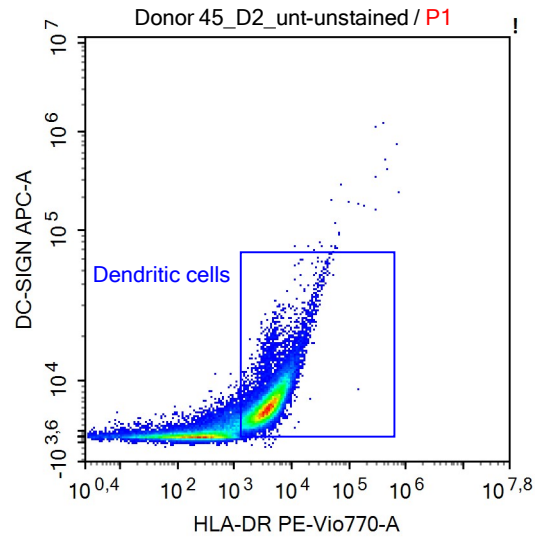

| Gate            | Count  | % P1    |
|-----------------|--------|---------|
| P1              | 65.904 | 100,00% |
| Dendritic cells | 32.896 | 49,92%  |

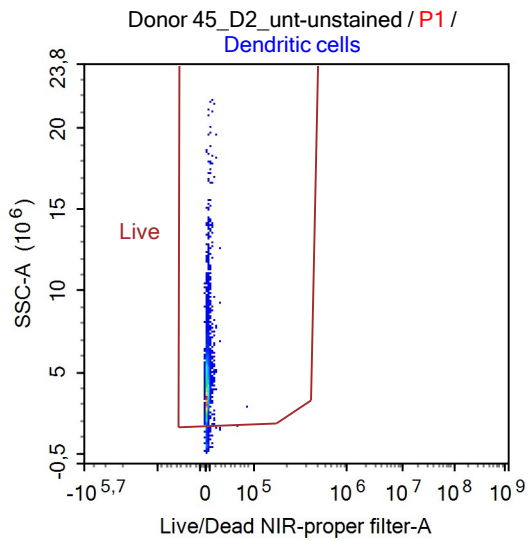

| Gate            | Count  | % Dendritic cells |
|-----------------|--------|-------------------|
| Dendritic cells | 32.896 | 100,00%           |
| Live            | 31.771 | 96,58%            |

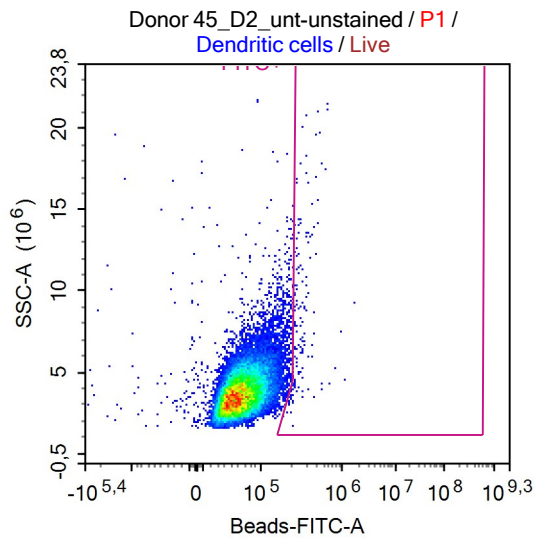

| Gate  | Count  | % Live  |
|-------|--------|---------|
| Live  | 31.771 | 100,00% |
| FITC+ | 126    | 0,40%   |

# Donor 45 FLU

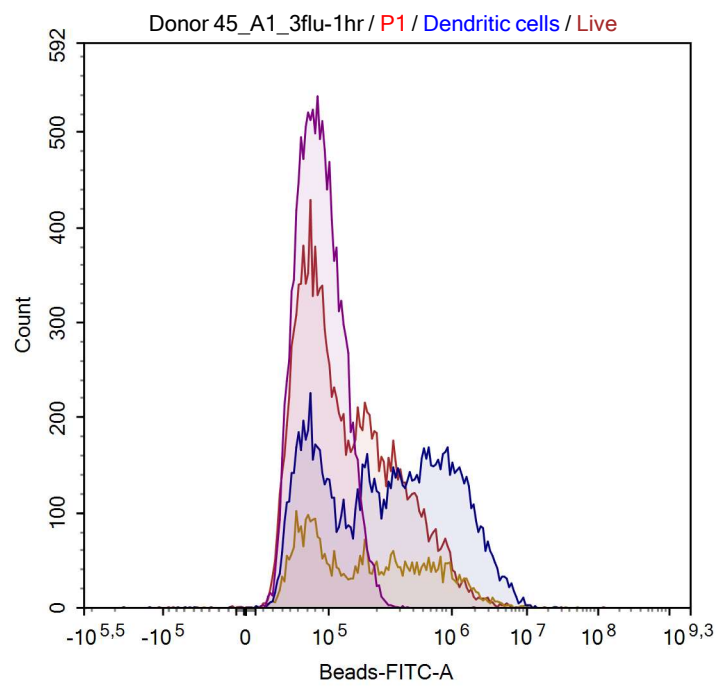

| # | Sample                | Gate  | Count  | Mean X  | Median X |
|---|-----------------------|-------|--------|---------|----------|
| 1 | Donor 45_A1_3flu-1hr  | Live  | 14.332 | 227.982 | 110.745  |
| 2 | Donor 45_B1_3flu-3hr  | Live* | 4.099  | 437.355 | 165.173  |
| 3 | Donor 45_C1_3flu-6hr  | Live* | 12.152 | 647.736 | 250.656  |
| 4 | Donor 45_D1_untreated | Live* | 13.060 | 89.496  | 84.376   |

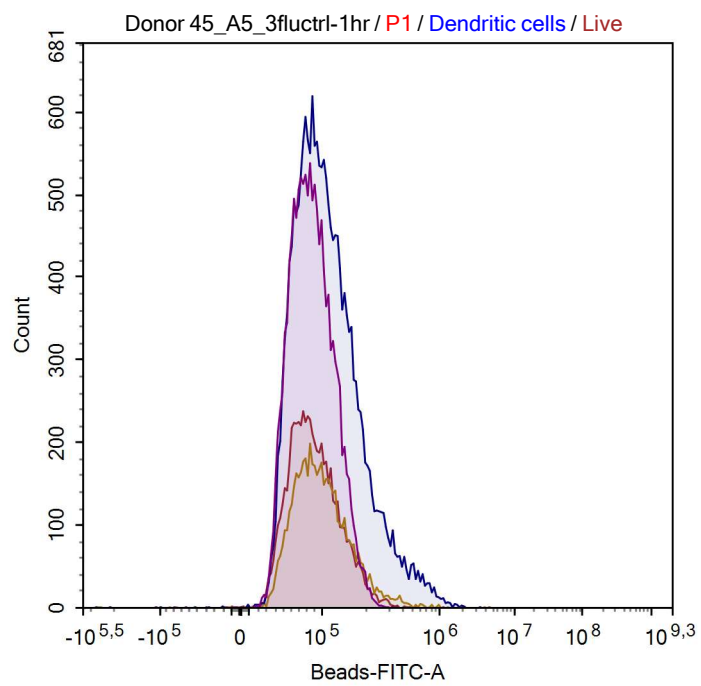

| # | Sample                   | Gate  | Count  | Mean X  | Median X |
|---|--------------------------|-------|--------|---------|----------|
| 1 | Donor 45_A5_3fluctrl-1hr | Live  | 6.119  | 94.978  | 85.092   |
| 2 | Donor 45_B5_3fluctrl-3hr | Live* | 5.183  | 111.817 | 95.205   |
| 3 | Donor 45_C5_3fluctrl-6hr | Live* | 18.815 | 132.241 | 101.177  |
| 4 | Donor 45_D1_untreated    | Live* | 13.060 | 89.496  | 84.376   |

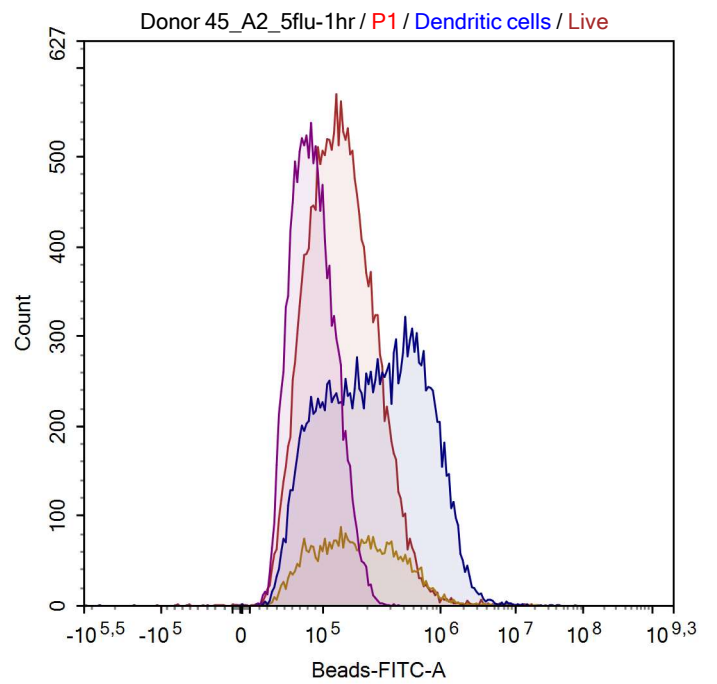

| # | Sample                | Gate  | Count  | Mean X  | Median X |
|---|-----------------------|-------|--------|---------|----------|
| 1 | Donor 45_A2_5flu-1hr  | Live  | 20.481 | 180.201 | 129.106  |
| 2 | Donor 45_B2_5flu-3hr  | Live* | 3.915  | 281.150 | 163.458  |
| 3 | Donor 45_C2_5flu-6hr  | Live* | 17.672 | 414.182 | 230.279  |
| 4 | Donor 45_D1_untreated | Live* | 13.060 | 89.496  | 84.376   |

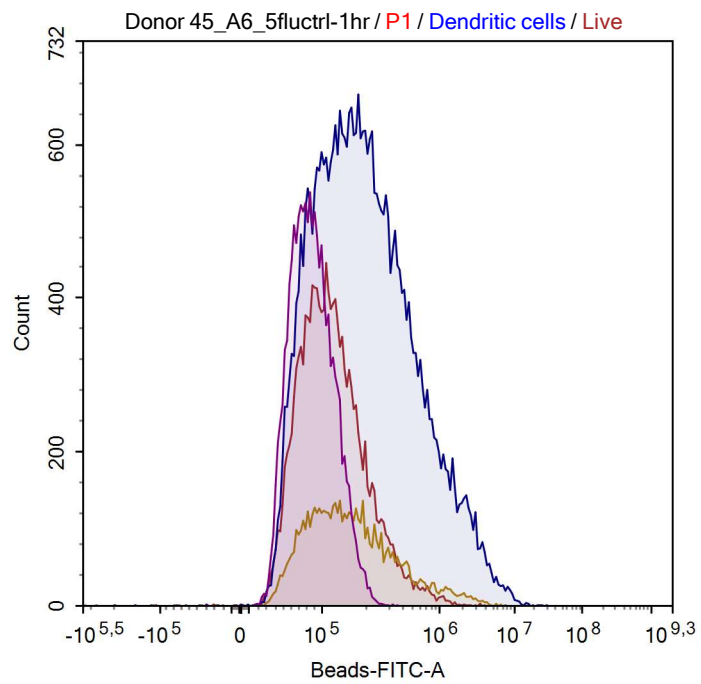

| # | Sample                   | Gate  | Count  | Mean X  | Median X |
|---|--------------------------|-------|--------|---------|----------|
| 1 | Donor 45_A6_5fluctrl-1hr | Live  | 14.129 | 143.638 | 111.042  |
| 2 | Donor 45_B6_5fluctrl-3hr | Live* | 6.087  | 278.058 | 143.781  |
| 3 | Donor 45_C6_5fluctrl-6hr | Live* | 35.744 | 428.219 | 176.819  |
| 4 | Donor 45_D1_untreated    | Live* | 13.060 | 89.496  | 84.376   |

Donor 45 HEP

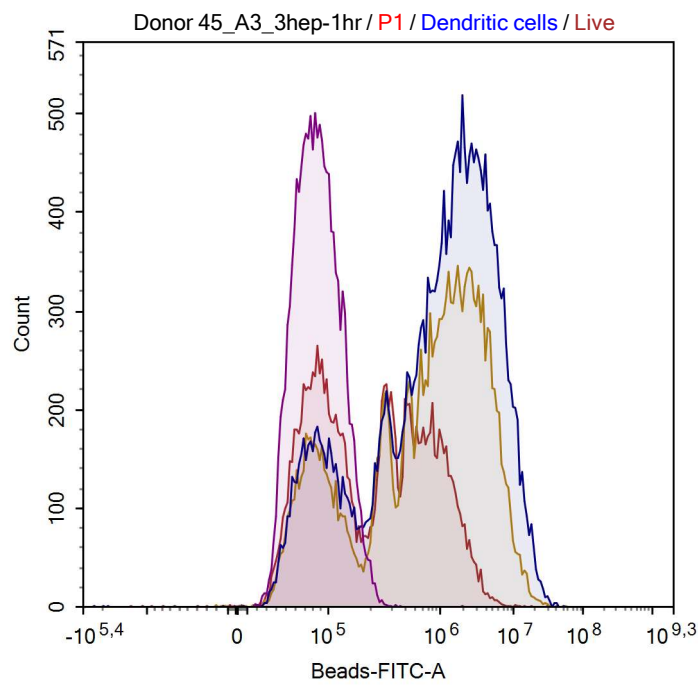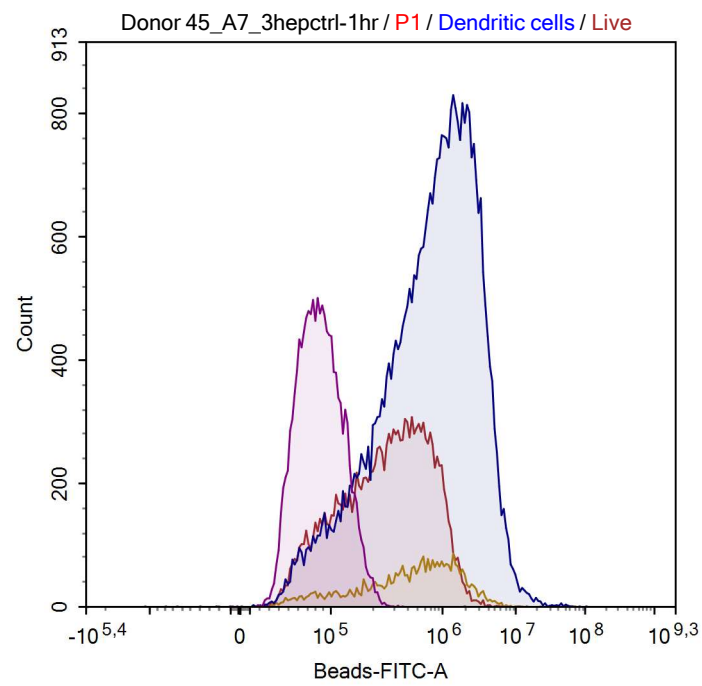

| # | Sample               | Gate  | Count  | Mean X    | Median X  |
|---|----------------------|-------|--------|-----------|-----------|
| 1 | Donor 45_A3_3hep-1hr | Live  | 13.541 | 469.726   | 215.377   |
| 2 | Donor 45_B3_3hep-3hr | Live* | 18.854 | 1.790.932 | 838.967   |
| 3 | Donor 45_C3_3hep-6hr | Live* | 25.633 | 2.508.999 | 1.172.151 |
| 4 | Donor 45_D1_un-      | Live* | 13.060 | 89.496    | 84.376    |

| # | Sample                   | Gate  | Count  | Mean X    | Median X |
|---|--------------------------|-------|--------|-----------|----------|
| 1 | Donor 45_A7_3hepctrl-1hr | Live  | 14.856 | 409.829   | 270.835  |
| 2 | Donor 45_B7_3hepctrl-3hr | Live* | 3.481  | 849.589   | 503.419  |
| 3 | Donor 45_C7_3hepctrl-6hr | Live* | 37.711 | 1.454.734 | 835.261  |
| 4 | Donor 45_D1_un-          | Live* | 13.060 | 89.496    | 84.376   |

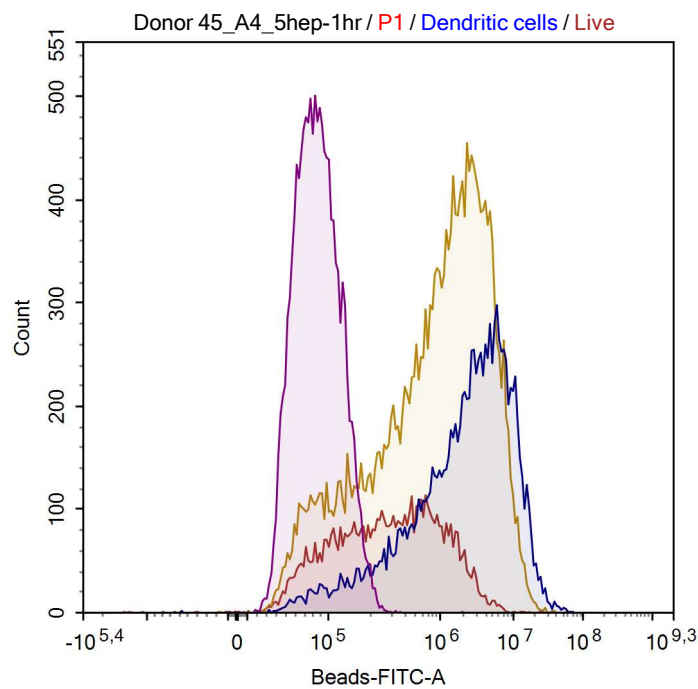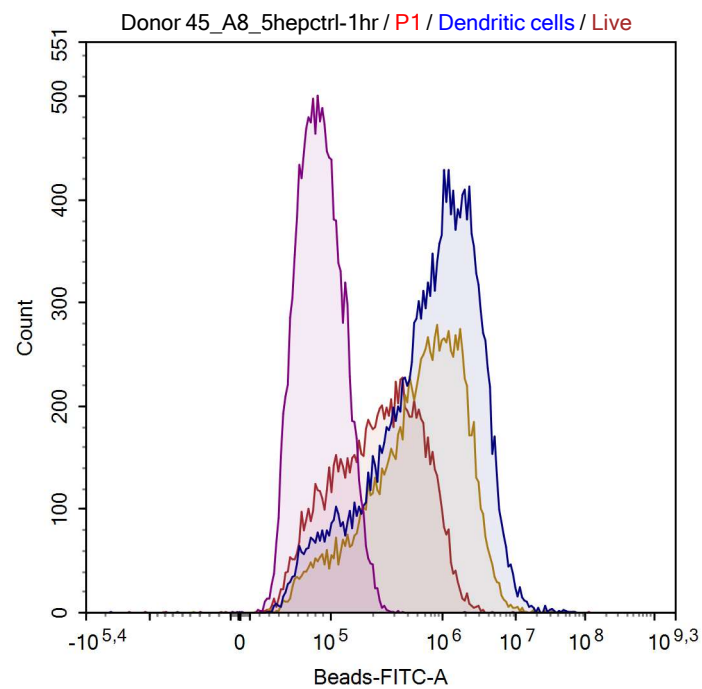

| # | Sample               | Gate  | Count  | Mean X    | Median X  |
|---|----------------------|-------|--------|-----------|-----------|
| 1 | Donor 45_A4_5hep-1hr | Live  | 6.356  | 626.773   | 288.020   |
| 2 | Donor 45_B4_5hep-3hr | Live* | 22.091 | 2.040.434 | 1.059.001 |
| 3 | Donor 45_C4_5hep-6hr | Live* | 11.807 | 4.327.917 | 2.545.932 |
| 4 | Donor 45_D1_un-      | Live* | 13.060 | 89.496    | 84.376    |

| # | Sample                   | Gate  | Count  | Mean X    | Median X |
|---|--------------------------|-------|--------|-----------|----------|
| 1 | Donor 45_A8_5hepctrl-1hr | Live  | 10.744 | 368.840   | 228.412  |
| 2 | Donor 45_B8_5hepctrl-3hr | Live* | 12.569 | 1.008.711 | 601.683  |
| 3 | Donor 45_C8_5hepctrl-6hr | Live* | 18.985 | 1.458.732 | 829.042  |
| 4 | Donor 45_D1_un-          | Live* | 13.060 | 89.496    | 84.376   |
