# Supplementary material for: Assessing the Immunomodulatory Effect of Size on the Uptake and Immunogenicity of Influenza- and Hepatitis B Subunit Vaccines In Vitro
Source: MDPI journal article supplement (doi:10.3390/ph15070887), 2022-07-18
Supplement: s1 [file s1]

# Report of Donor 41

Specimen Name: Donor 41  
Cytometer: NovoCyt<sup>e</sup> Quanteon 621200611403

Run Time: 26-1-2022 11:52  
Software: NovoExpress 1.5.6

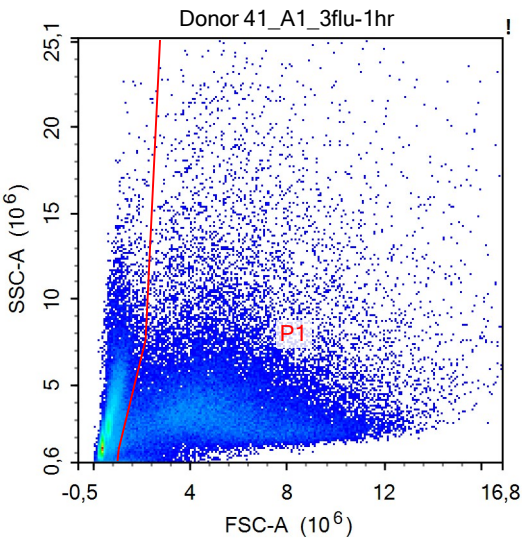

| Gate | Count   | % All   |
|------|---------|---------|
| All  | 292.578 | 100,00% |
| P1   | 41.197  | 14,08%  |

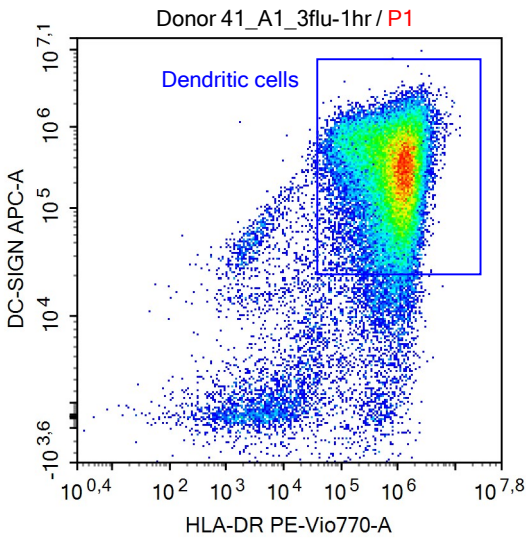

| Gate            | Count  | % P1    |
|-----------------|--------|---------|
| P1              | 41.197 | 100,00% |
| Dendritic cells | 34.738 | 84,32%  |

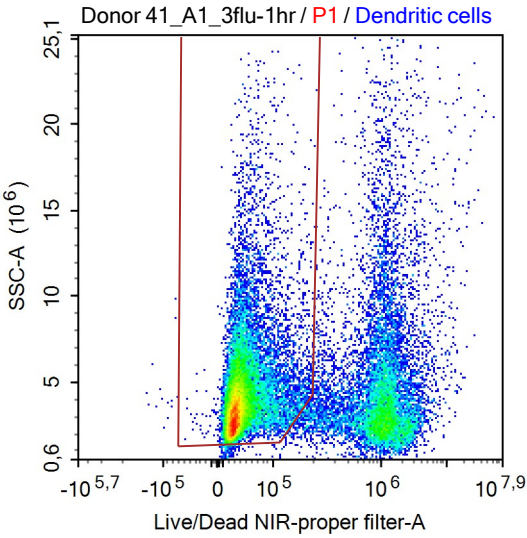

| Gate            | Count  | % Dendritic cells |
|-----------------|--------|-------------------|
| Dendritic cells | 34.738 | 100,00%           |
| Live            | 23.634 | 68,04%            |

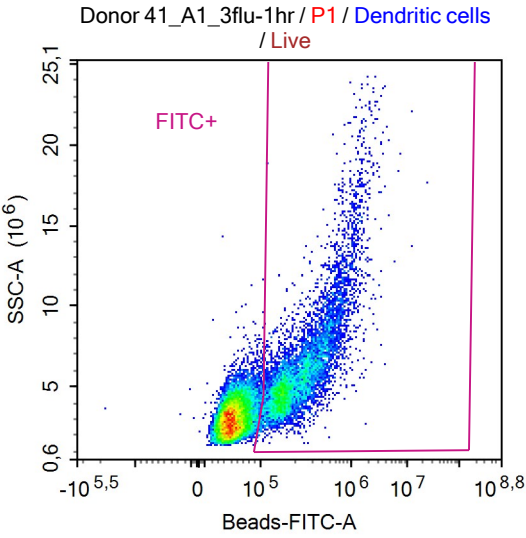

| Gate  | Count  | % Live  |
|-------|--------|---------|
| Live  | 23.634 | 100,00% |
| FITC+ | 8.620  | 36,47%  |

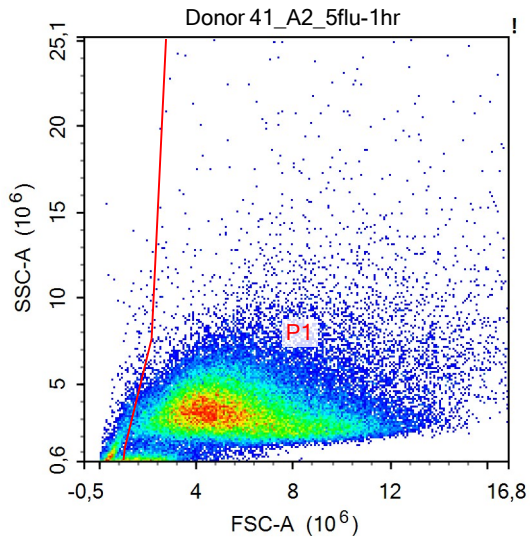

| Gate | Count   | % All   |
|------|---------|---------|
| All  | 138.597 | 100,00% |
| P1   | 73.250  | 52,85%  |

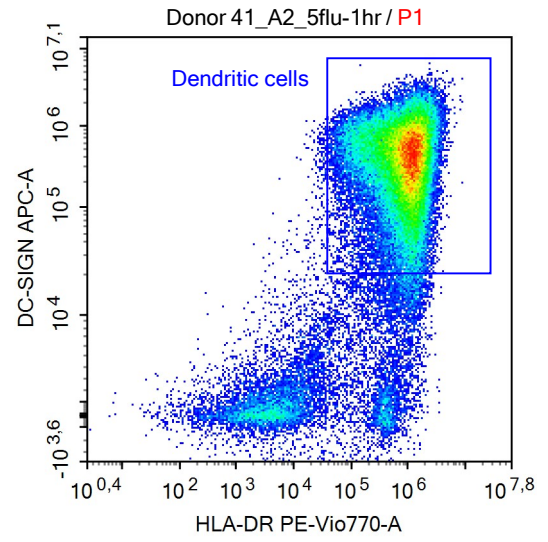

| Gate            | Count  | % P1    |
|-----------------|--------|---------|
| P1              | 73.250 | 100,00% |
| Dendritic cells | 60.209 | 82,20%  |

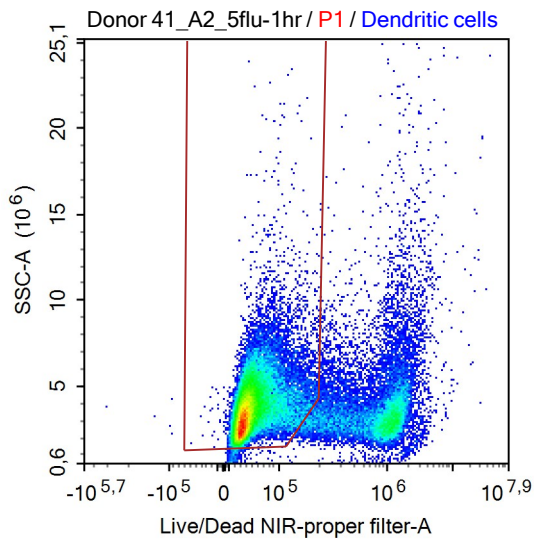

| Gate            | Count  | % Dendritic cells |
|-----------------|--------|-------------------|
| Dendritic cells | 60.209 | 100,00%           |
| Live            | 46.372 | 77,02%            |

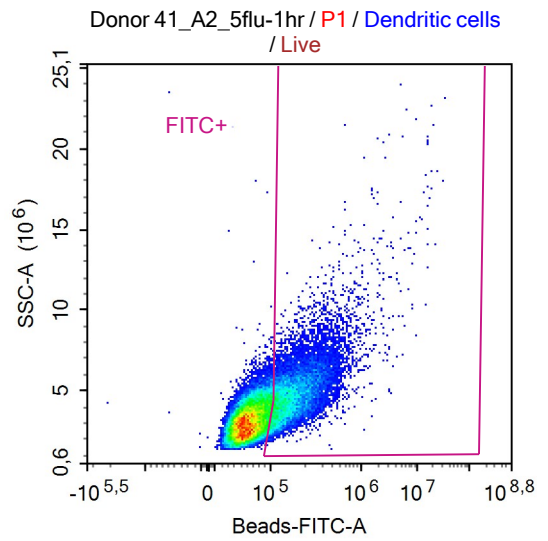

| Gate  | Count  | % Live  |
|-------|--------|---------|
| Live  | 46.372 | 100,00% |
| FITC+ | 13.694 | 29,53%  |

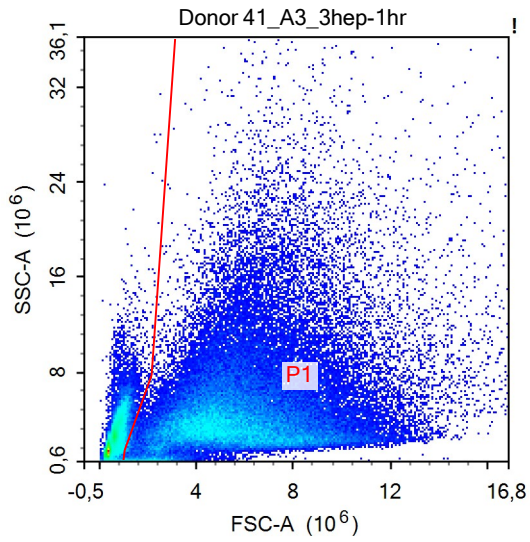

| Gate | Count   | % All   |
|------|---------|---------|
| All  | 296.769 | 100,00% |
| P1   | 66.806  | 22,51%  |

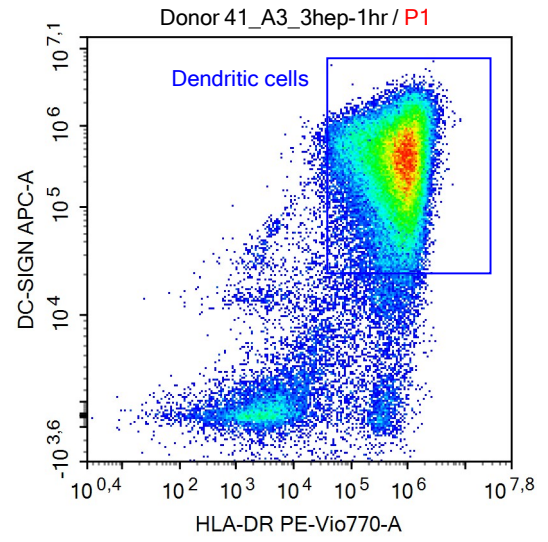

| Gate            | Count  | % P1    |
|-----------------|--------|---------|
| P1              | 66.806 | 100,00% |
| Dendritic cells | 54.259 | 81,22%  |

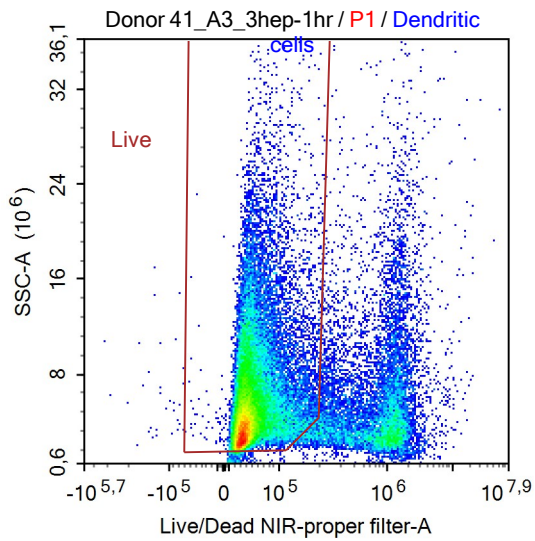

| Gate            | Count  | % Dendritic cells |
|-----------------|--------|-------------------|
| Dendritic cells | 54.259 | 100,00%           |
| Live            | 43.371 | 79,93%            |

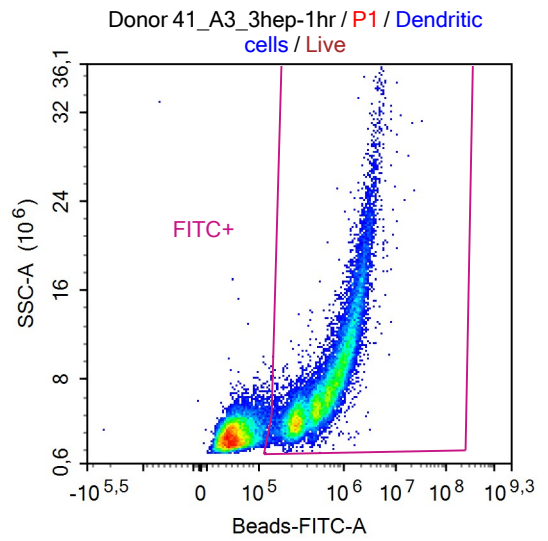

| Gate  | Count  | % Live  |
|-------|--------|---------|
| Live  | 43.371 | 100,00% |
| FITC+ | 25.328 | 58,40%  |

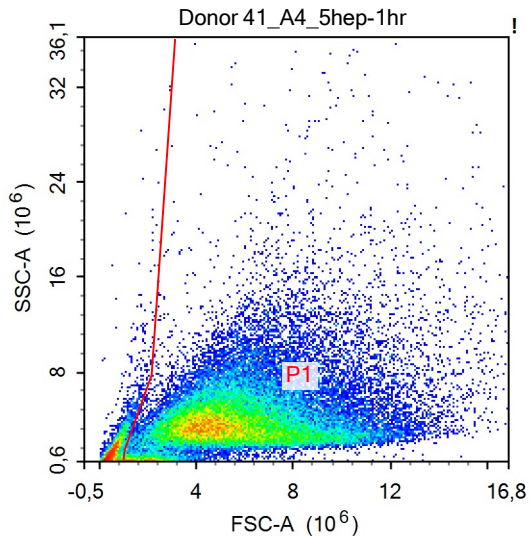

| Gate | Count   | % All   |
|------|---------|---------|
| All  | 117.372 | 100,00% |
| P1   | 48.110  | 40,99%  |

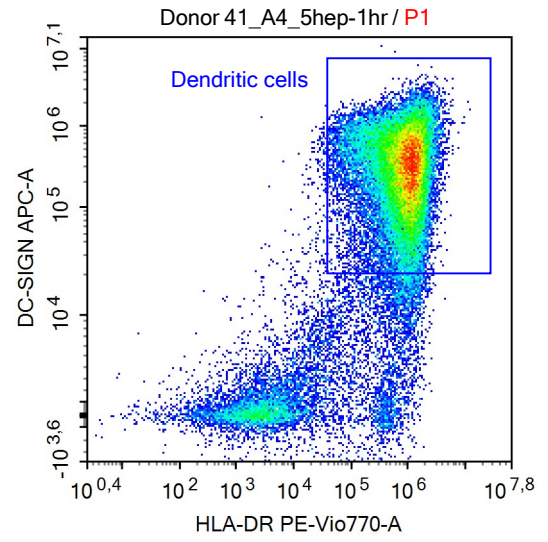

| Gate            | Count  | % P1    |
|-----------------|--------|---------|
| P1              | 48.110 | 100,00% |
| Dendritic cells | 37.139 | 77,20%  |

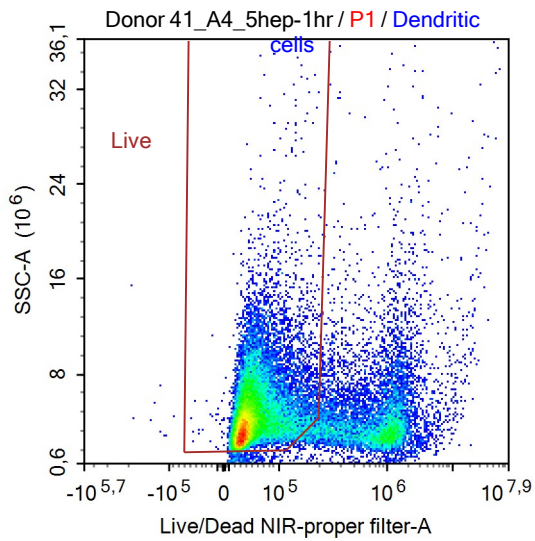

| Gate            | Count  | % Dendritic cells |
|-----------------|--------|-------------------|
| Dendritic cells | 37.139 | 100,00%           |
| Live            | 28.309 | 76,22%            |

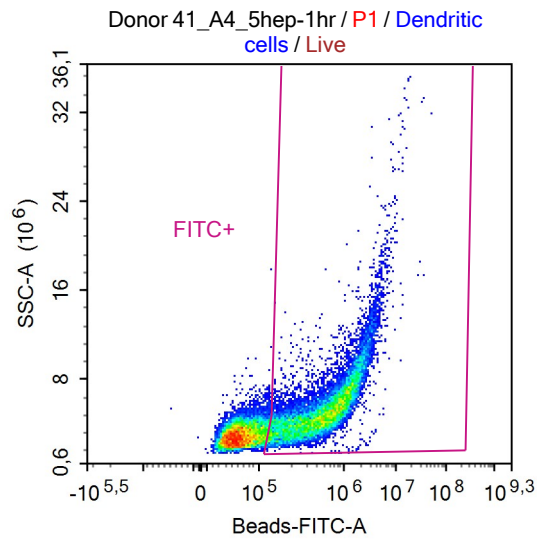

| Gate  | Count  | % Live  |
|-------|--------|---------|
| Live  | 28.309 | 100,00% |
| FITC+ | 16.223 | 57,31%  |



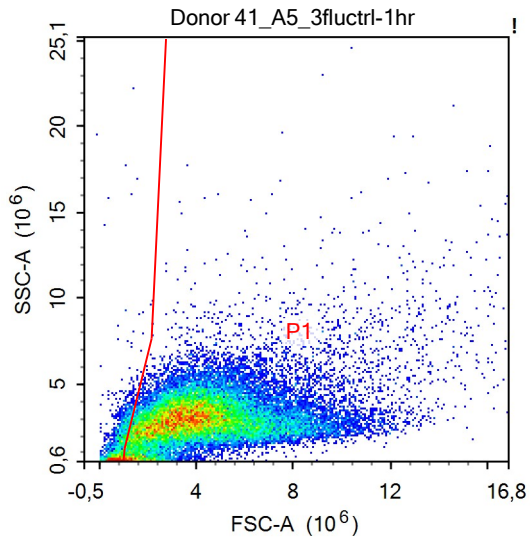

| Gate | Count  | % All   |
|------|--------|---------|
| All  | 72.535 | 100,00% |
| P1   | 32.199 | 44,39%  |

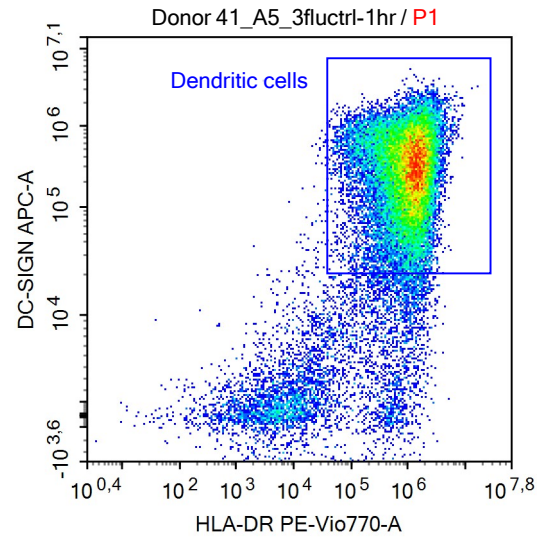

| Gate            | Count  | % P1    |
|-----------------|--------|---------|
| P1              | 32.199 | 100,00% |
| Dendritic cells | 26.063 | 80,94%  |

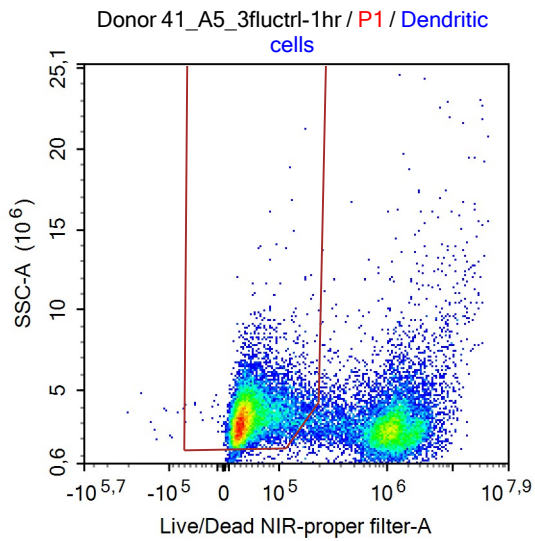

| Gate            | Count  | % Dendritic cells |
|-----------------|--------|-------------------|
| Dendritic cells | 26.063 | 100,00%           |
| Live            | 14.842 | 56,95%            |

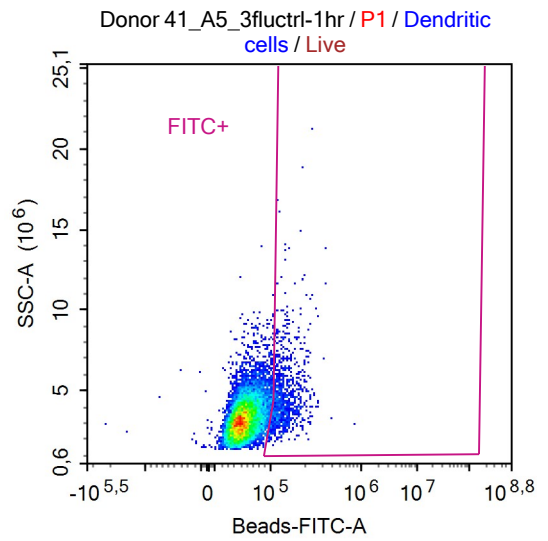

| Gate  | Count  | % Live  |
|-------|--------|---------|
| Live  | 14.842 | 100,00% |
| FITC+ | 957    | 6,45%   |

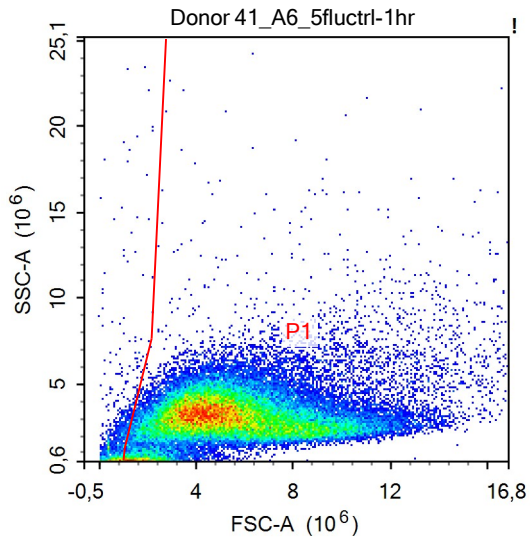

| Gate | Count   | % All   |
|------|---------|---------|
| All  | 114.140 | 100,00% |
| P1   | 59.889  | 52,47%  |

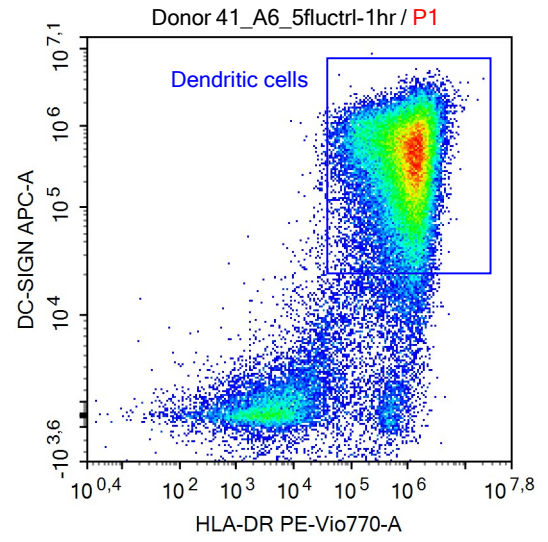

| Gate            | Count  | % P1    |
|-----------------|--------|---------|
| P1              | 59.889 | 100,00% |
| Dendritic cells | 46.088 | 76,96%  |

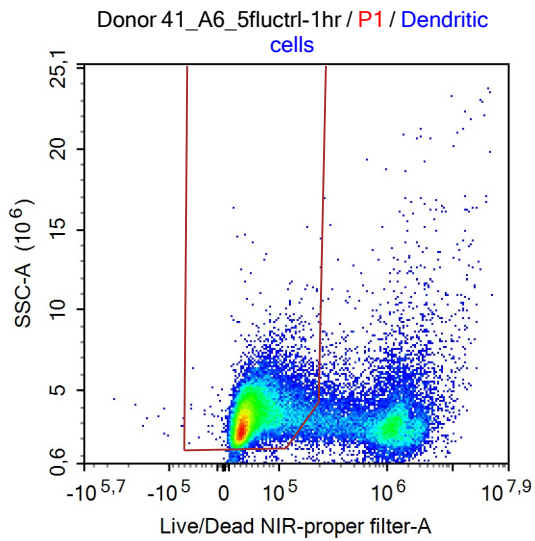

| Gate            | Count  | % Dendritic cells |
|-----------------|--------|-------------------|
| Dendritic cells | 46.088 | 100,00%           |
| Live            | 33.745 | 73,22%            |

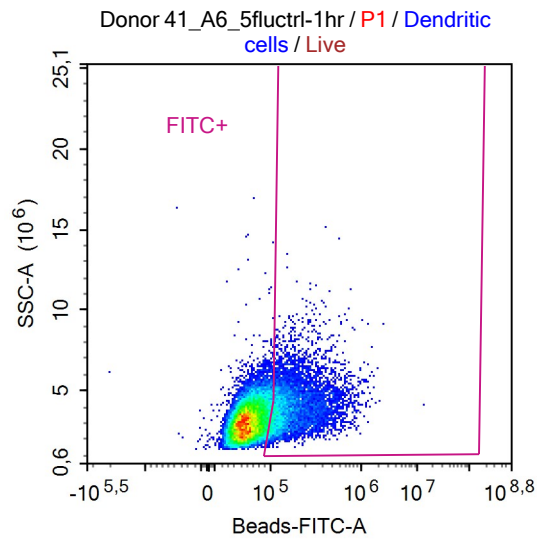

| Gate  | Count  | % Live  |
|-------|--------|---------|
| Live  | 33.745 | 100,00% |
| FITC+ | 7.074  | 20,96%  |

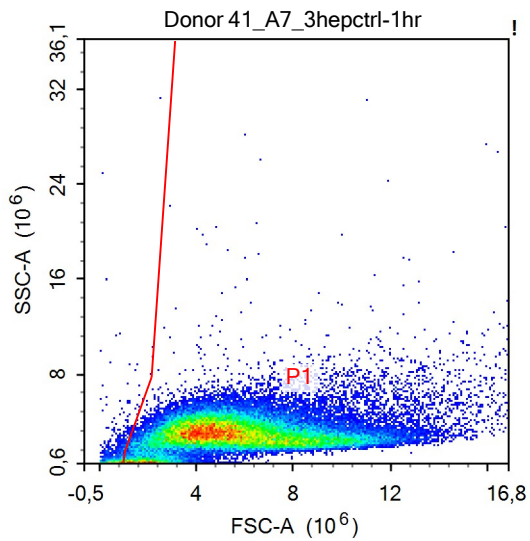

| Gate | Count   | % All   |
|------|---------|---------|
| All  | 123.513 | 100,00% |
| P1   | 64.231  | 52,00%  |

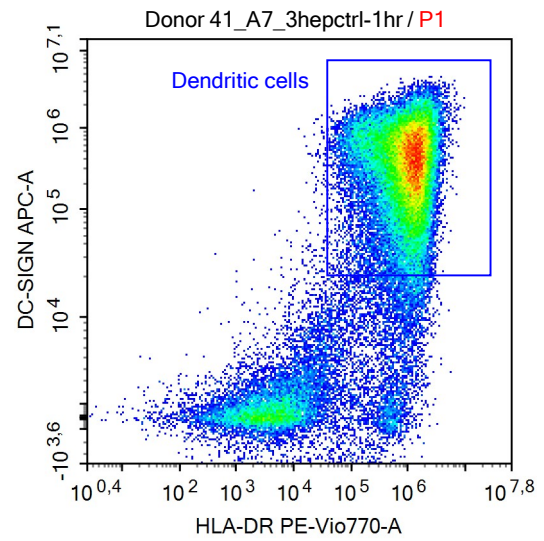

| Gate            | Count  | % P1    |
|-----------------|--------|---------|
| P1              | 64.231 | 100,00% |
| Dendritic cells | 47.267 | 73,59%  |

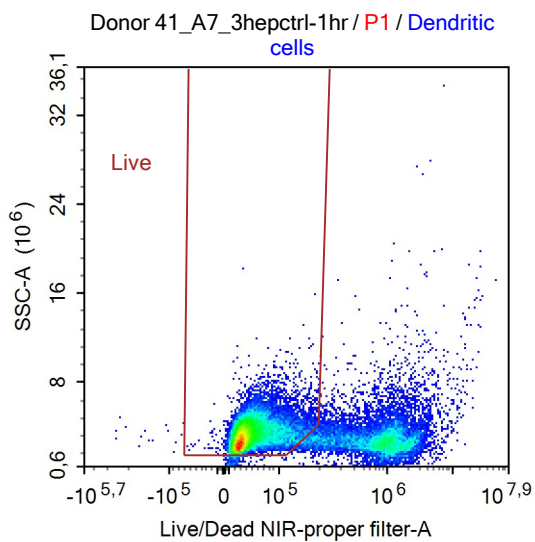

| Gate            | Count  | % Dendritic cells |
|-----------------|--------|-------------------|
| Dendritic cells | 47.267 | 100,00%           |
| Live            | 35.329 | 74,74%            |

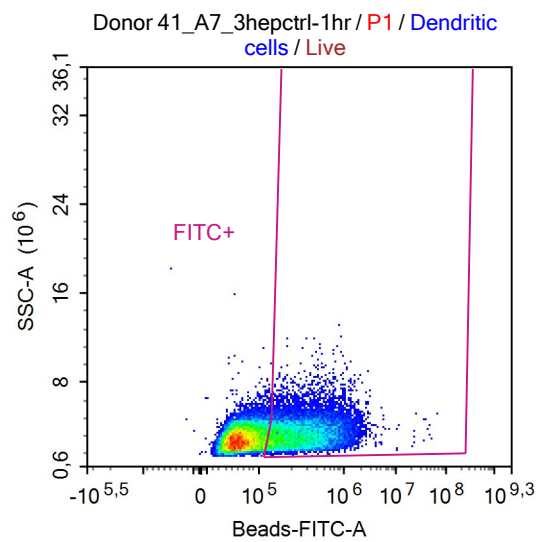

| Gate  | Count  | % Live  |
|-------|--------|---------|
| Live  | 35.329 | 100,00% |
| FITC+ | 14.059 | 39,79%  |

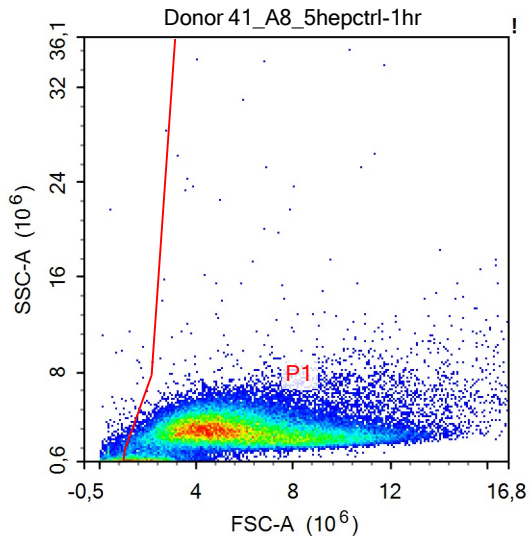

| Gate | Count   | % All   |
|------|---------|---------|
| All  | 122.529 | 100,00% |
| P1   | 63.321  | 51,68%  |

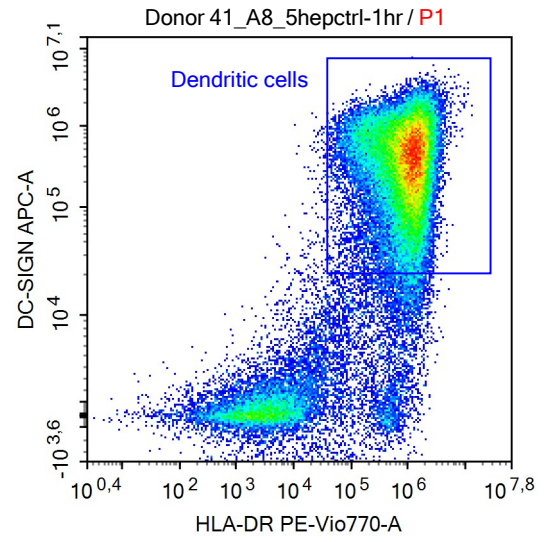

| Gate            | Count  | % P1    |
|-----------------|--------|---------|
| P1              | 63.321 | 100,00% |
| Dendritic cells | 46.562 | 73,53%  |

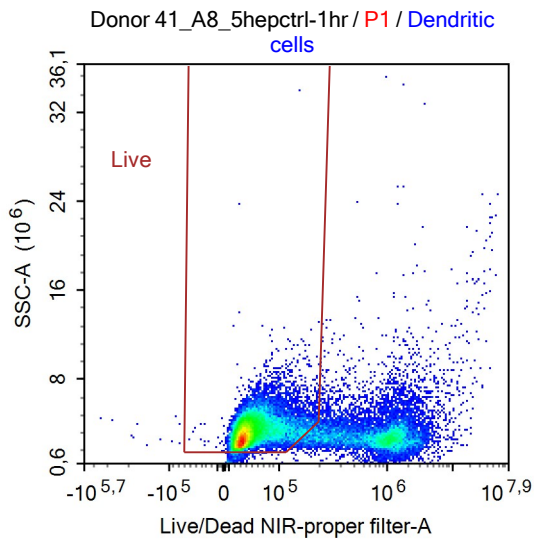

| Gate            | Count  | % Dendritic cells |
|-----------------|--------|-------------------|
| Dendritic cells | 46.562 | 100,00%           |
| Live            | 35.273 | 75,75%            |

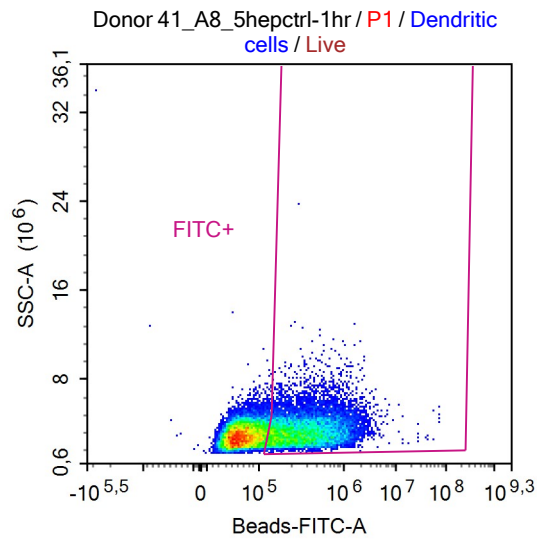

| Gate  | Count  | % Live  |
|-------|--------|---------|
| Live  | 35.273 | 100,00% |
| FITC+ | 15.912 | 45,11%  |



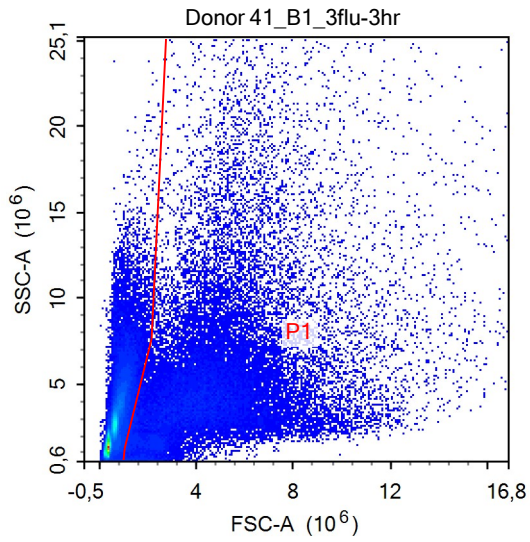

| Gate | Count   | % All   |
|------|---------|---------|
| All  | 588.606 | 100,00% |
| P1   | 42.847  | 7,28%   |

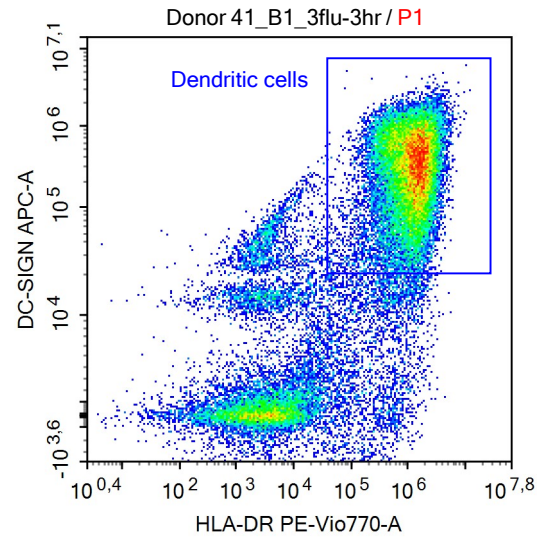

| Gate            | Count  | % P1    |
|-----------------|--------|---------|
| P1              | 42.847 | 100,00% |
| Dendritic cells | 25.472 | 59,45%  |

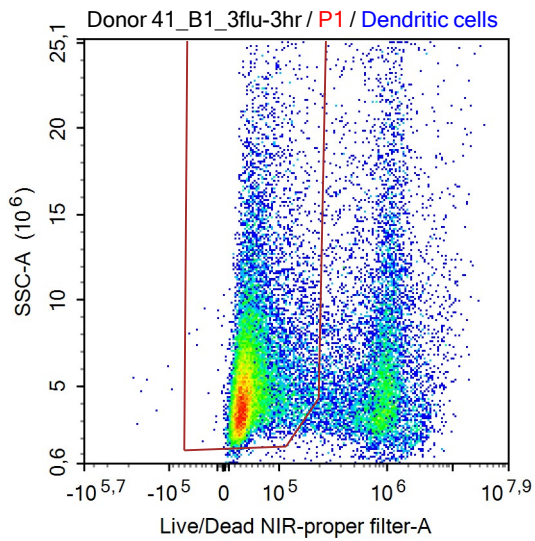

| Gate            | Count  | % Dendritic cells |
|-----------------|--------|-------------------|
| Dendritic cells | 25.472 | 100,00%           |
| Live            | 17.286 | 67,86%            |

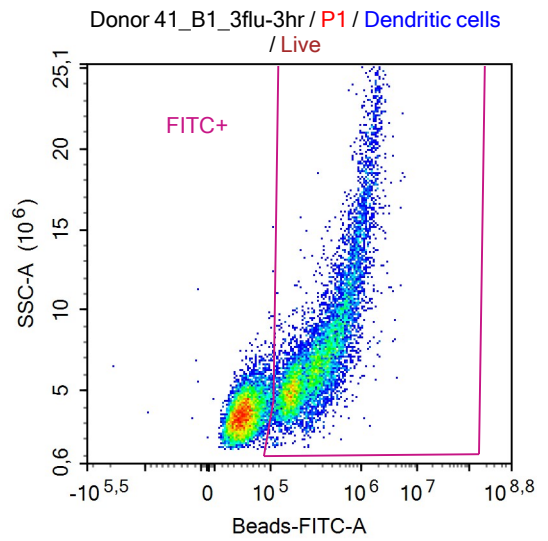

| Gate  | Count  | % Live  |
|-------|--------|---------|
| Live  | 17.286 | 100,00% |
| FITC+ | 9.980  | 57,73%  |

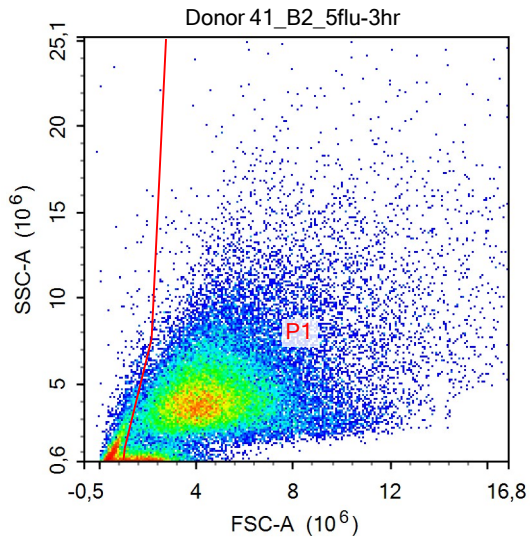

| Gate | Count   | % All   |
|------|---------|---------|
| All  | 139.375 | 100,00% |
| P1   | 59.276  | 42,53%  |

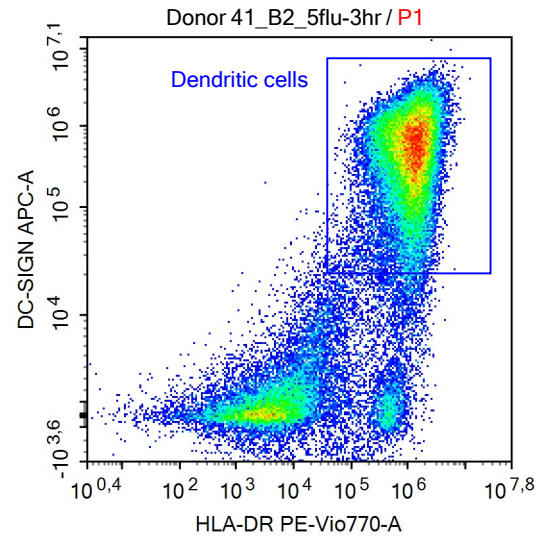

| Gate            | Count  | % P1    |
|-----------------|--------|---------|
| P1              | 59.276 | 100,00% |
| Dendritic cells | 36.766 | 62,03%  |

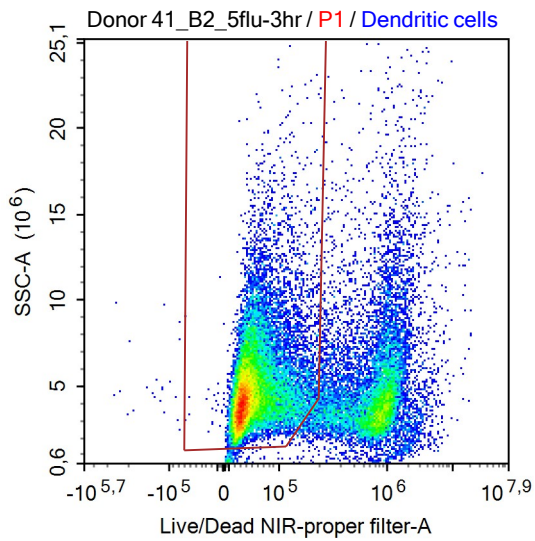

| Gate            | Count  | % Dendritic cells |
|-----------------|--------|-------------------|
| Dendritic cells | 36.766 | 100,00%           |
| Live            | 24.534 | 66,73%            |

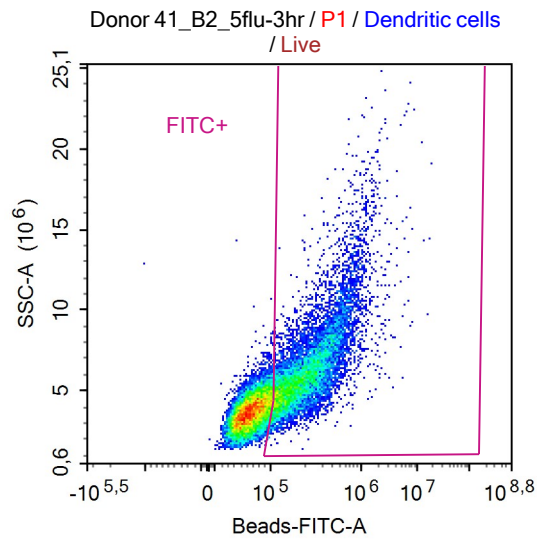

| Gate  | Count  | % Live  |
|-------|--------|---------|
| Live  | 24.534 | 100,00% |
| FITC+ | 11.289 | 46,01%  |

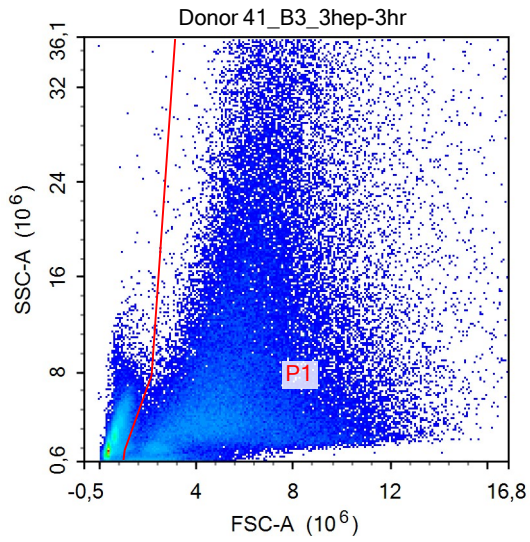

| Gate | Count   | % All   |
|------|---------|---------|
| All  | 477.080 | 100,00% |
| P1   | 103.084 | 21,61%  |

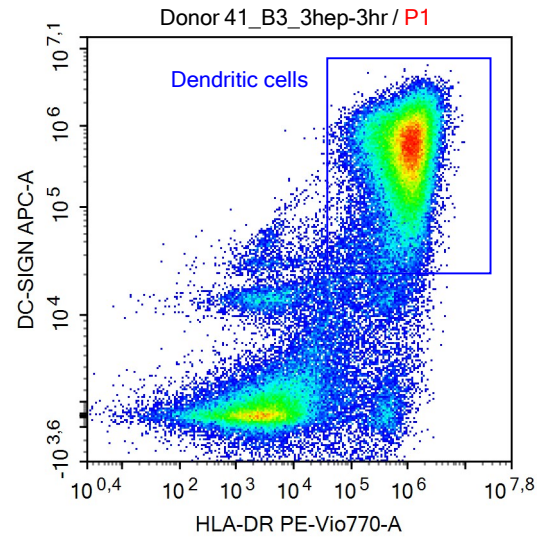

| Gate            | Count   | % P1    |
|-----------------|---------|---------|
| P1              | 103.084 | 100,00% |
| Dendritic cells | 59.833  | 58,04%  |

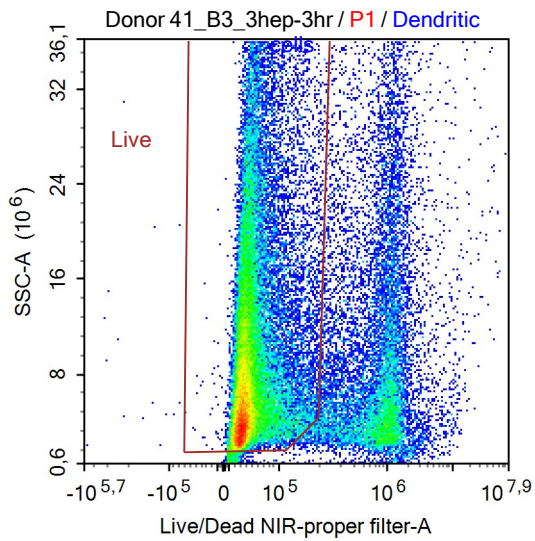

| Gate            | Count  | % Dendritic cells |
|-----------------|--------|-------------------|
| Dendritic cells | 59.833 | 100,00%           |
| Live            | 45.130 | 75,43%            |

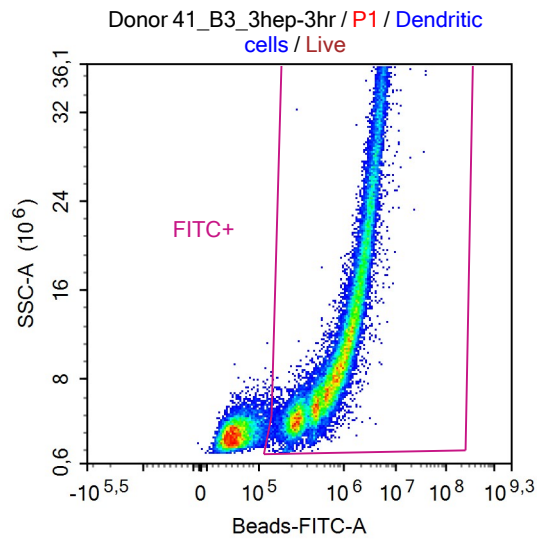

| Gate  | Count  | % Live  |
|-------|--------|---------|
| Live  | 45.130 | 100,00% |
| FITC+ | 34.980 | 77,51%  |



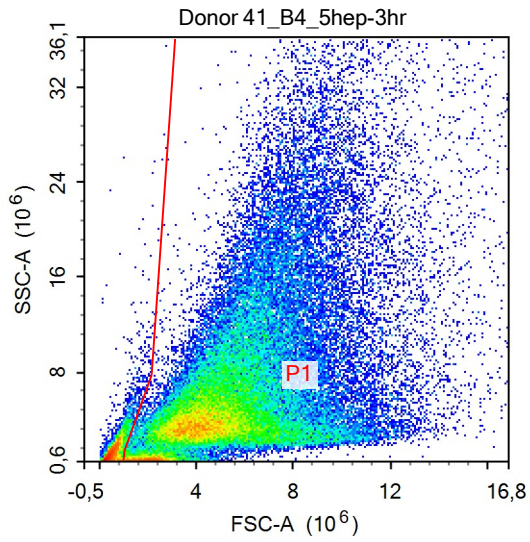

| Gate | Count   | % All   |
|------|---------|---------|
| All  | 191.828 | 100,00% |
| P1   | 89.693  | 46,76%  |

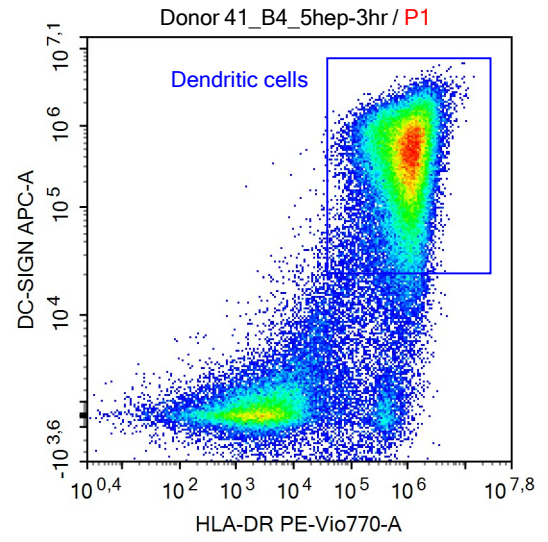

| Gate            | Count  | % P1    |
|-----------------|--------|---------|
| P1              | 89.693 | 100,00% |
| Dendritic cells | 56.714 | 63,23%  |

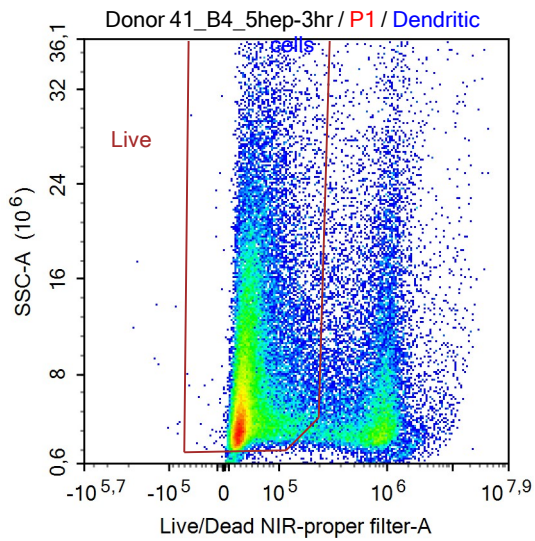

| Gate            | Count  | % Dendritic cells |
|-----------------|--------|-------------------|
| Dendritic cells | 56.714 | 100,00%           |
| Live            | 41.972 | 74,01%            |

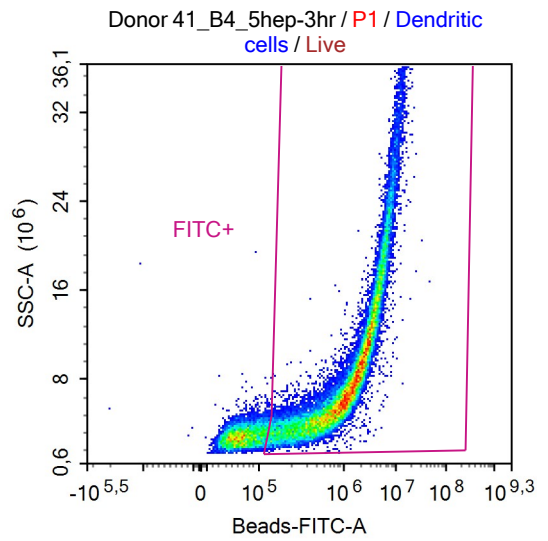

| Gate  | Count  | % Live  |
|-------|--------|---------|
| Live  | 41.972 | 100,00% |
| FITC+ | 33.903 | 80,78%  |



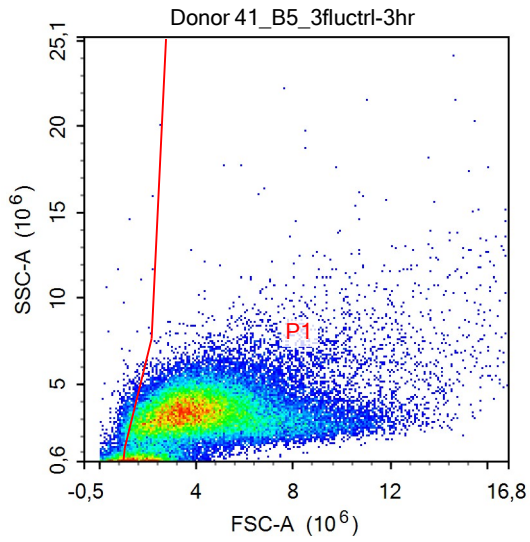

| Gate | Count   | % All   |
|------|---------|---------|
| All  | 110.681 | 100,00% |
| P1   | 56.934  | 51,44%  |

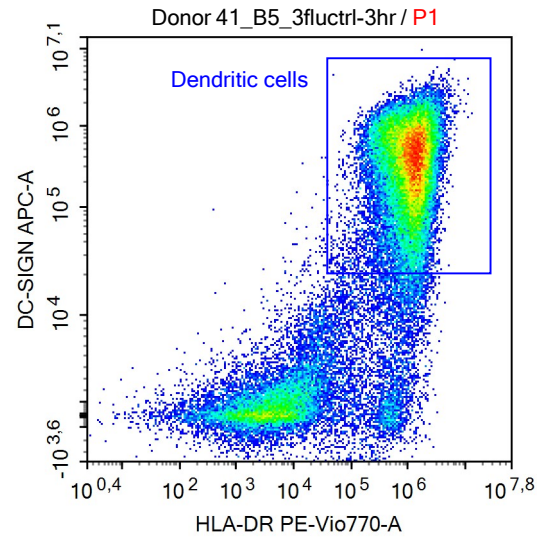

| Gate            | Count  | % P1    |
|-----------------|--------|---------|
| P1              | 56.934 | 100,00% |
| Dendritic cells | 36.783 | 64,61%  |

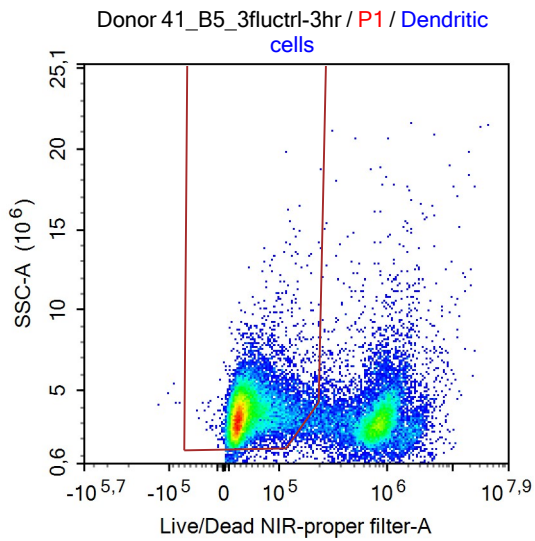

| Gate            | Count  | % Dendritic cells |
|-----------------|--------|-------------------|
| Dendritic cells | 36.783 | 100,00%           |
| Live            | 23.919 | 65,03%            |

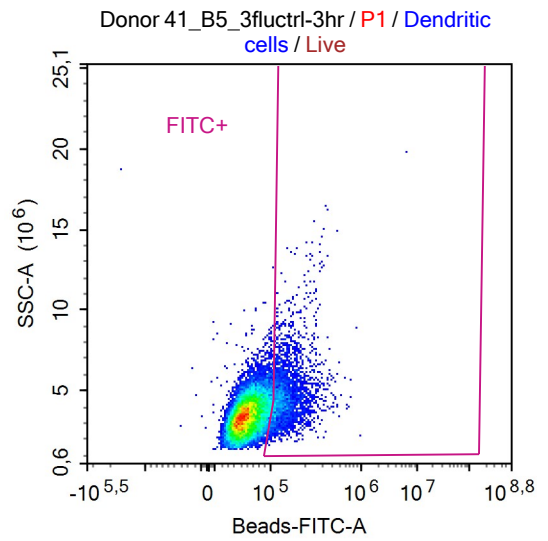

| Gate  | Count  | % Live  |
|-------|--------|---------|
| Live  | 23.919 | 100,00% |
| FITC+ | 2.788  | 11,66%  |

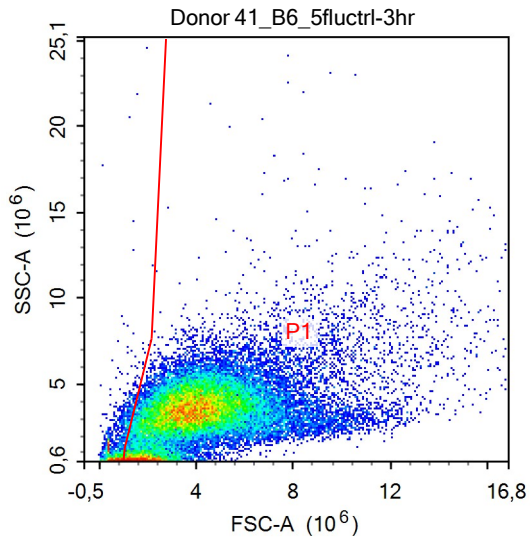

| Gate | Count   | % All   |
|------|---------|---------|
| All  | 119.233 | 100,00% |
| P1   | 58.180  | 48,80%  |

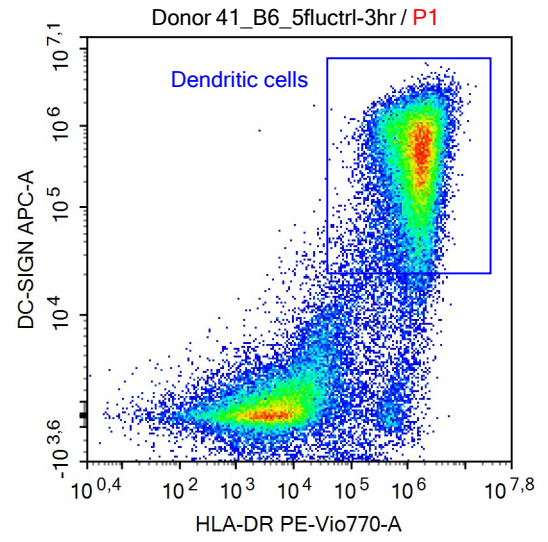

| Gate            | Count  | % P1    |
|-----------------|--------|---------|
| P1              | 58.180 | 100,00% |
| Dendritic cells | 28.470 | 48,93%  |

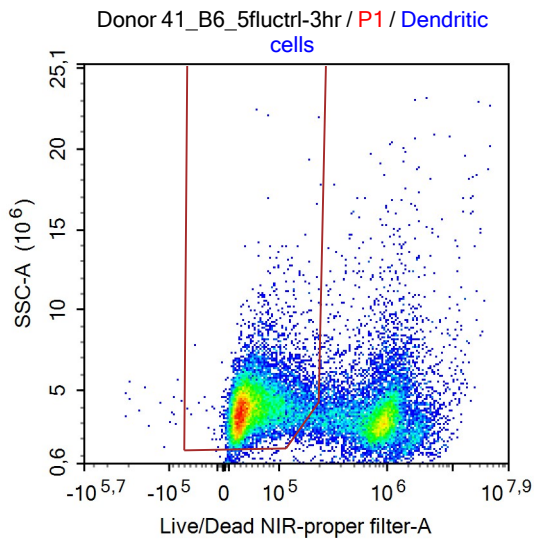

| Gate            | Count  | % Dendritic cells |
|-----------------|--------|-------------------|
| Dendritic cells | 28.470 | 100,00%           |
| Live            | 16.835 | 59,13%            |

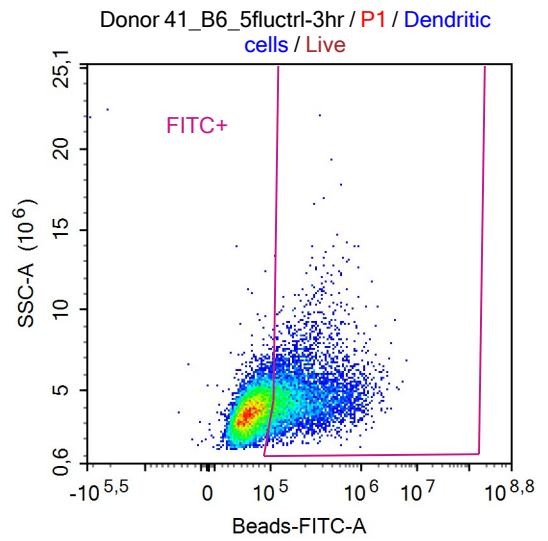

| Gate  | Count  | % Live  |
|-------|--------|---------|
| Live  | 16.835 | 100,00% |
| FITC+ | 5.503  | 32,69%  |

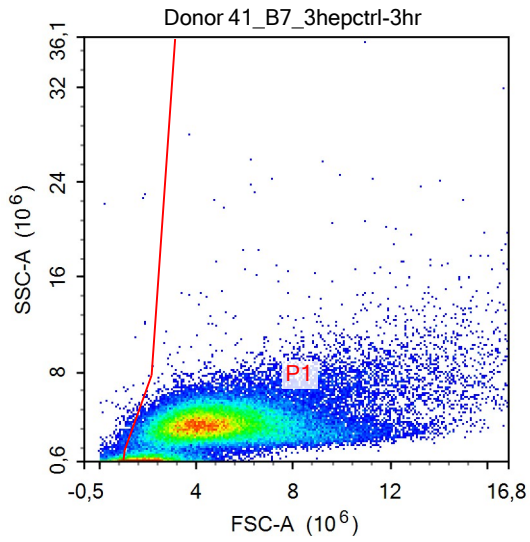

| Gate | Count   | % All   |
|------|---------|---------|
| All  | 174.603 | 100,00% |
| P1   | 96.409  | 55,22%  |

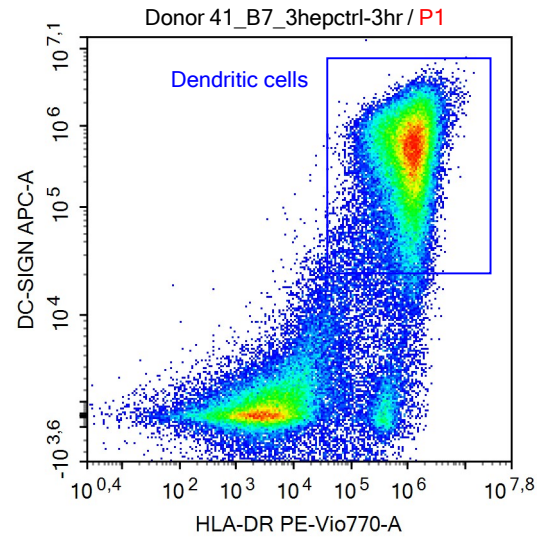

| Gate            | Count  | % P1    |
|-----------------|--------|---------|
| P1              | 96.409 | 100,00% |
| Dendritic cells | 49.817 | 51,67%  |

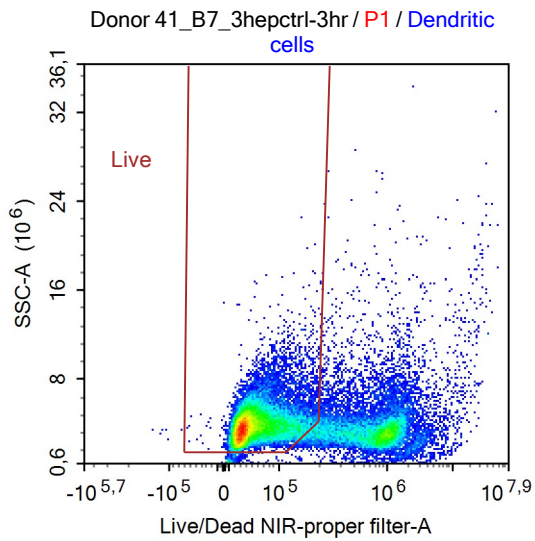

| Gate            | Count  | % Dendritic cells |
|-----------------|--------|-------------------|
| Dendritic cells | 49.817 | 100,00%           |
| Live            | 34.231 | 68,71%            |

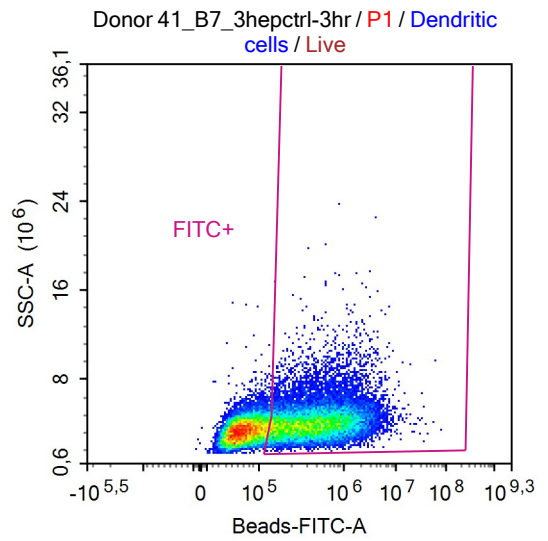

| Gate  | Count  | % Live  |
|-------|--------|---------|
| Live  | 34.231 | 100,00% |
| FITC+ | 18.927 | 55,29%  |

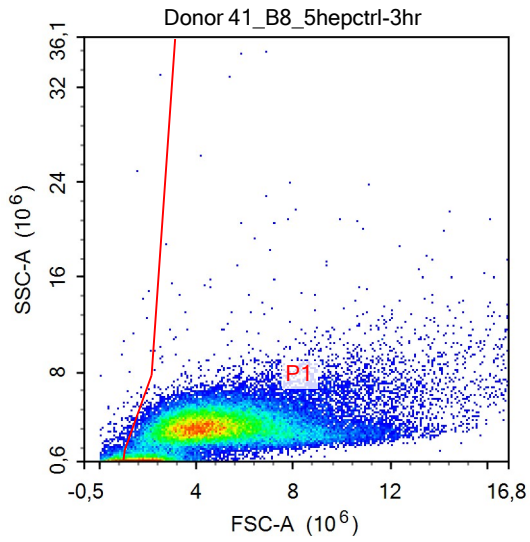

| Gate | Count   | % All   |
|------|---------|---------|
| All  | 149.643 | 100,00% |
| P1   | 81.648  | 54,56%  |

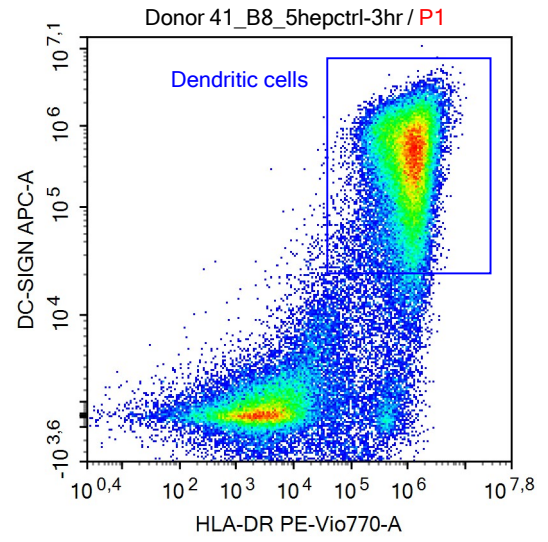

| Gate            | Count  | % P1    |
|-----------------|--------|---------|
| P1              | 81.648 | 100,00% |
| Dendritic cells | 42.364 | 51,89%  |

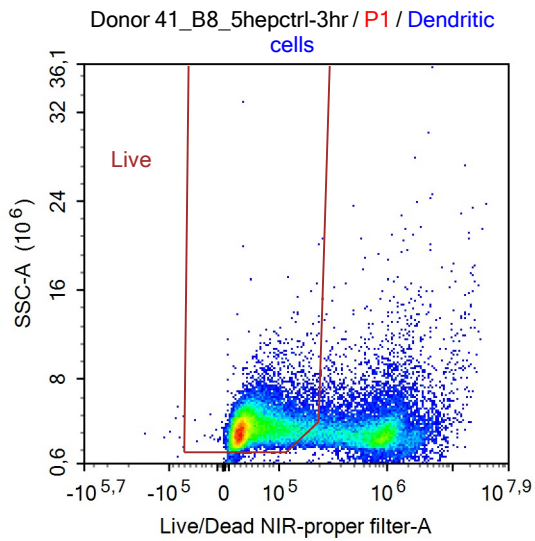

| Gate            | Count  | % Dendritic cells |
|-----------------|--------|-------------------|
| Dendritic cells | 42.364 | 100,00%           |
| Live            | 28.439 | 67,13%            |

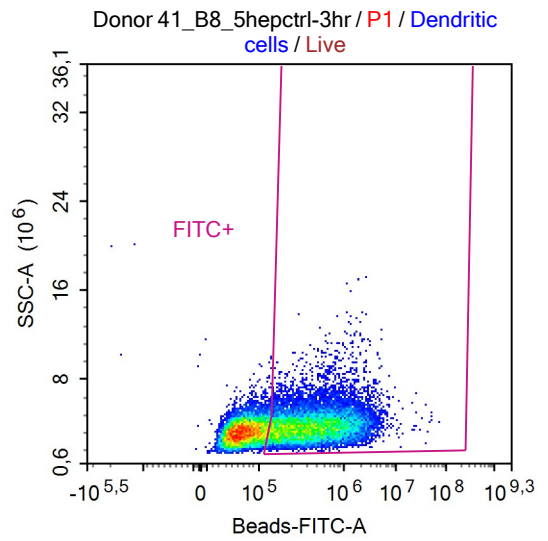

| Gate  | Count  | % Live  |
|-------|--------|---------|
| Live  | 28.439 | 100,00% |
| FITC+ | 15.507 | 54,53%  |



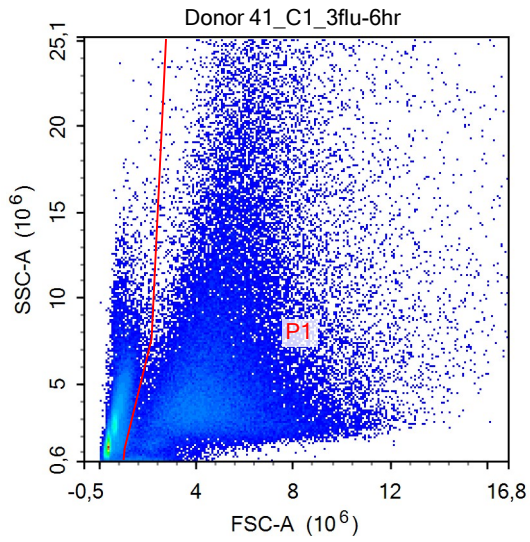

| Gate | Count   | % All   |
|------|---------|---------|
| All  | 463.147 | 100,00% |
| P1   | 65.788  | 14,20%  |

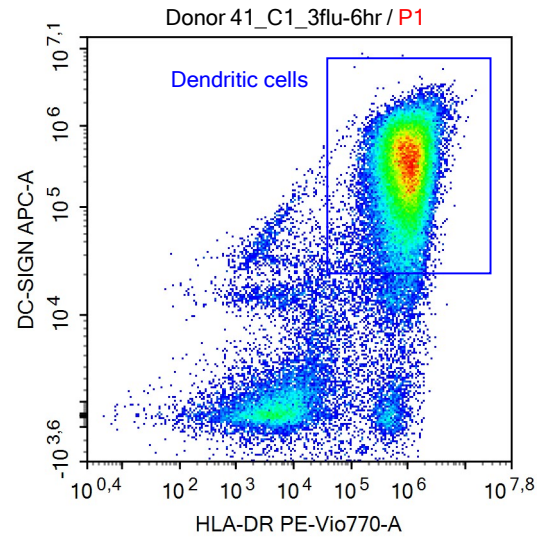

| Gate            | Count  | % P1    |
|-----------------|--------|---------|
| P1              | 65.788 | 100,00% |
| Dendritic cells | 50.573 | 76,87%  |

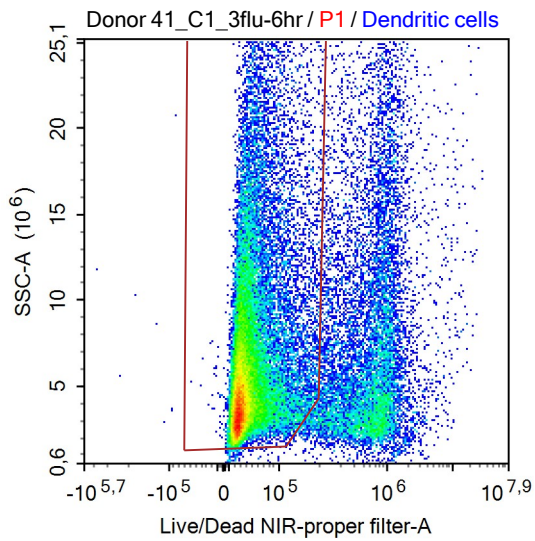

| Gate            | Count  | % Dendritic cells |
|-----------------|--------|-------------------|
| Dendritic cells | 50.573 | 100,00%           |
| Live            | 38.209 | 75,55%            |

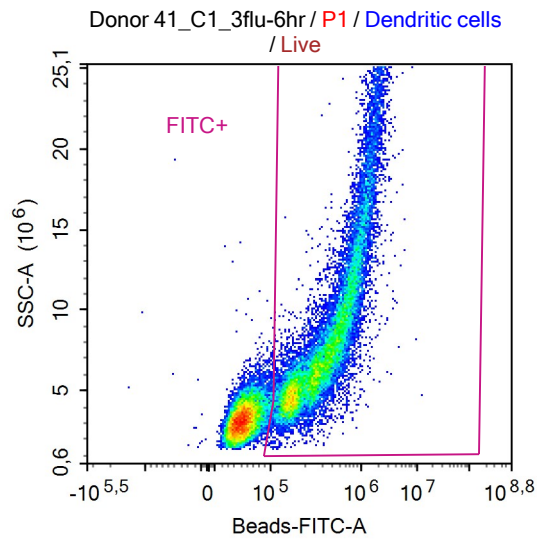

| Gate  | Count  | % Live  |
|-------|--------|---------|
| Live  | 38.209 | 100,00% |
| FITC+ | 23.826 | 62,36%  |

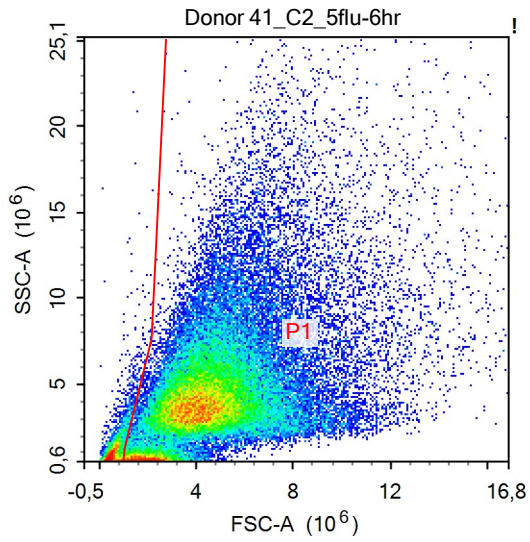

| Gate | Count   | % All   |
|------|---------|---------|
| All  | 165.326 | 100,00% |
| P1   | 76.783  | 46,44%  |

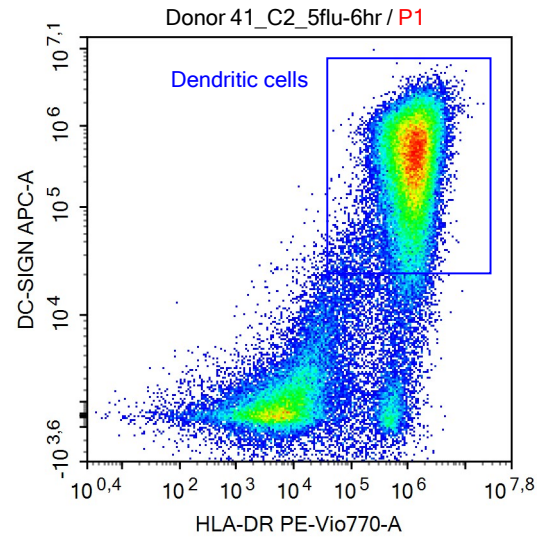

| Gate            | Count  | % P1    |
|-----------------|--------|---------|
| P1              | 76.783 | 100,00% |
| Dendritic cells | 47.611 | 62,01%  |

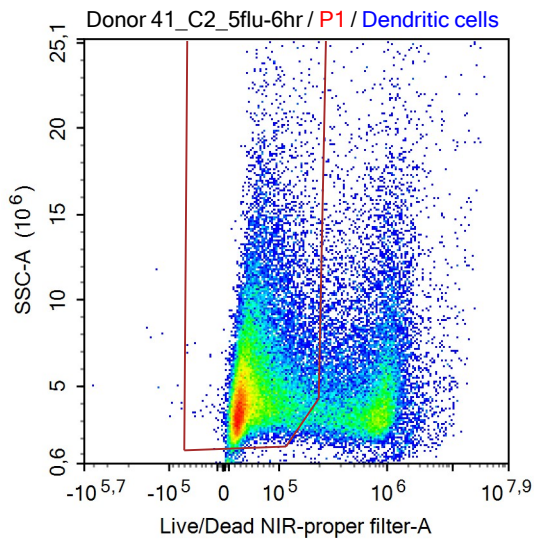

| Gate            | Count  | % Dendritic cells |
|-----------------|--------|-------------------|
| Dendritic cells | 47.611 | 100,00%           |
| Live            | 32.444 | 68,14%            |

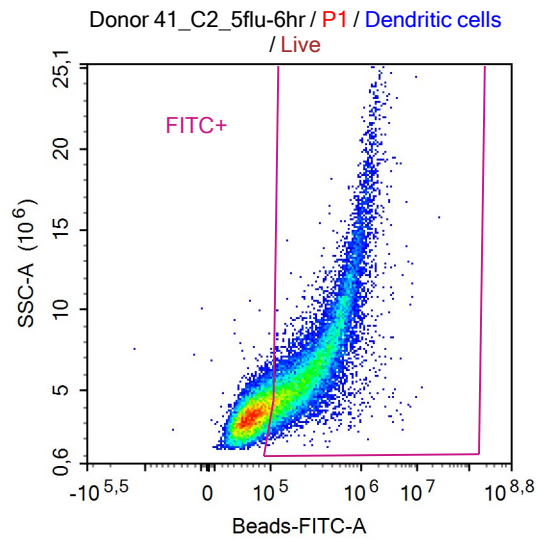

| Gate  | Count  | % Live  |
|-------|--------|---------|
| Live  | 32.444 | 100,00% |
| FITC+ | 17.354 | 53,49%  |

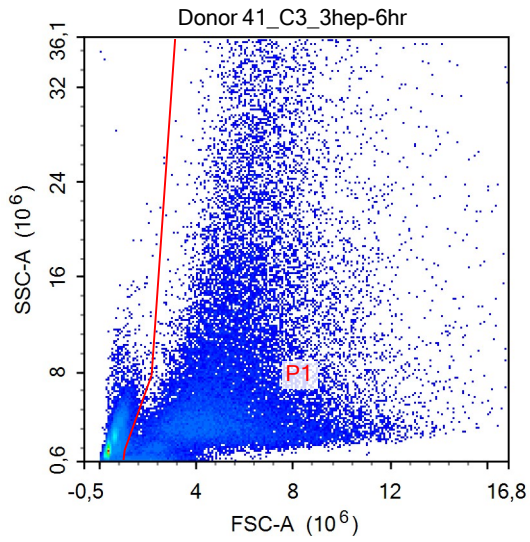

| Gate | Count   | % All   |
|------|---------|---------|
| All  | 286.750 | 100,00% |
| P1   | 42.781  | 14,92%  |

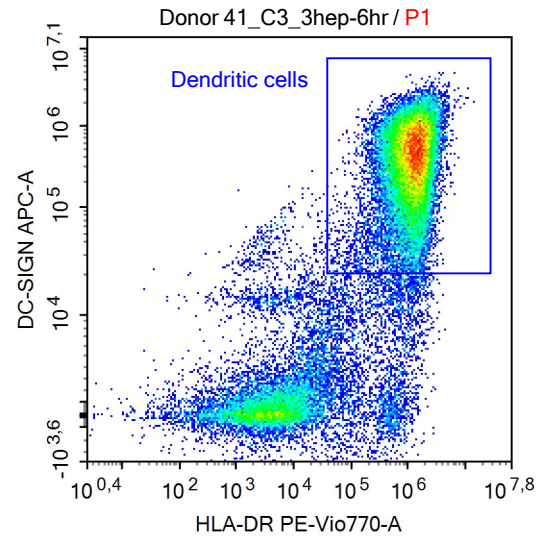

| Gate            | Count  | % P1    |
|-----------------|--------|---------|
| P1              | 42.781 | 100,00% |
| Dendritic cells | 27.362 | 63,96%  |

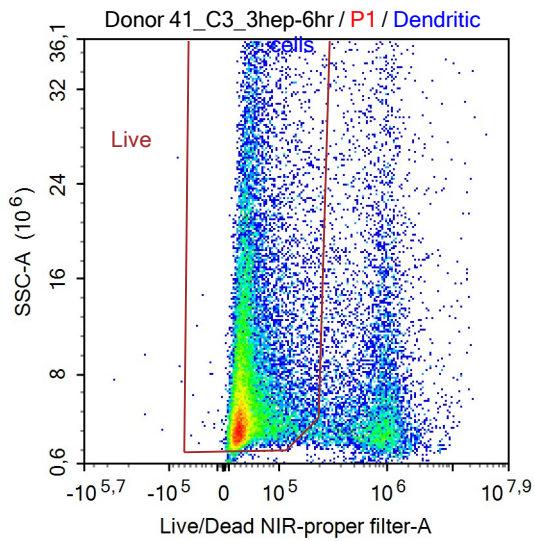

| Gate            | Count  | % Dendritic cells |
|-----------------|--------|-------------------|
| Dendritic cells | 27.362 | 100,00%           |
| Live            | 20.978 | 76,67%            |

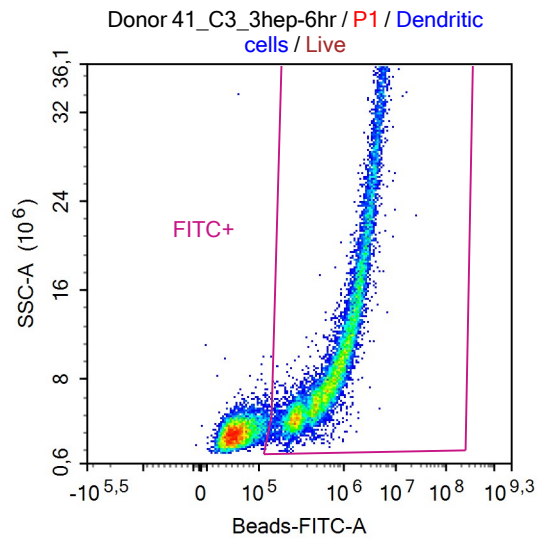

| Gate  | Count  | % Live  |
|-------|--------|---------|
| Live  | 20.978 | 100,00% |
| FITC+ | 14.122 | 67,32%  |



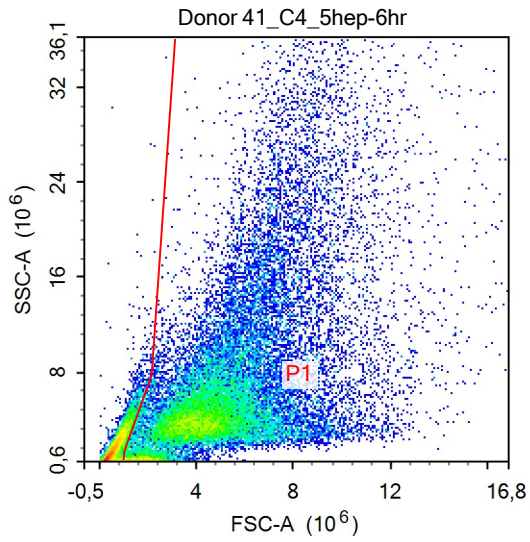

| Gate | Count   | % All   |
|------|---------|---------|
| All  | 109.610 | 100,00% |
| P1   | 38.450  | 35,08%  |

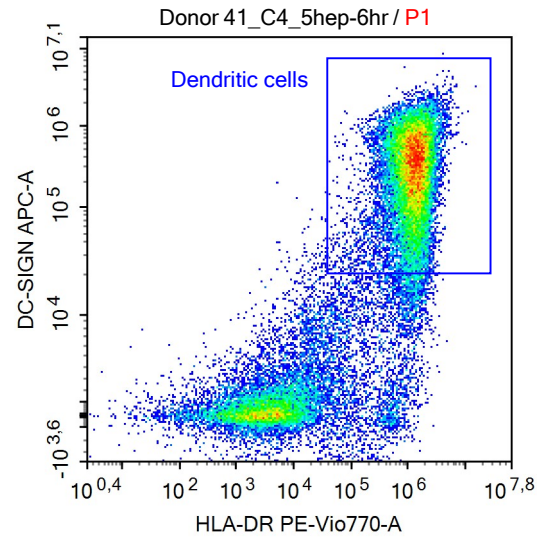

| Gate            | Count  | % P1    |
|-----------------|--------|---------|
| P1              | 38.450 | 100,00% |
| Dendritic cells | 22.233 | 57,82%  |

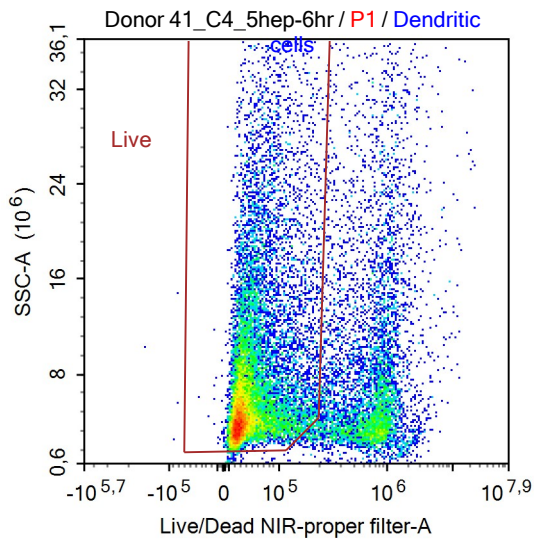

| Gate            | Count  | % Dendritic cells |
|-----------------|--------|-------------------|
| Dendritic cells | 22.233 | 100,00%           |
| Live            | 15.764 | 70,90%            |

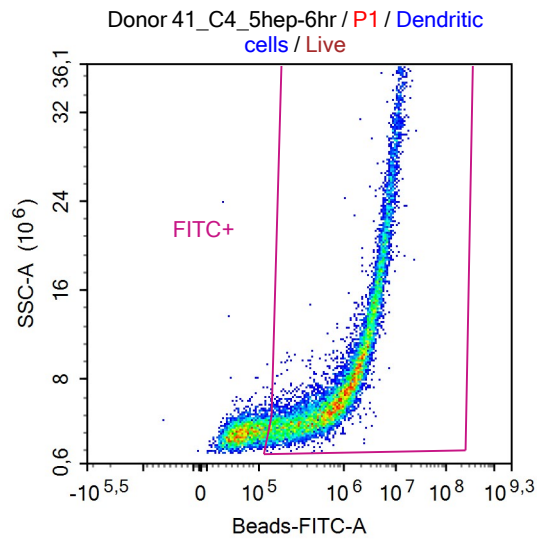

| Gate  | Count  | % Live  |
|-------|--------|---------|
| Live  | 15.764 | 100,00% |
| FITC+ | 12.157 | 77,12%  |



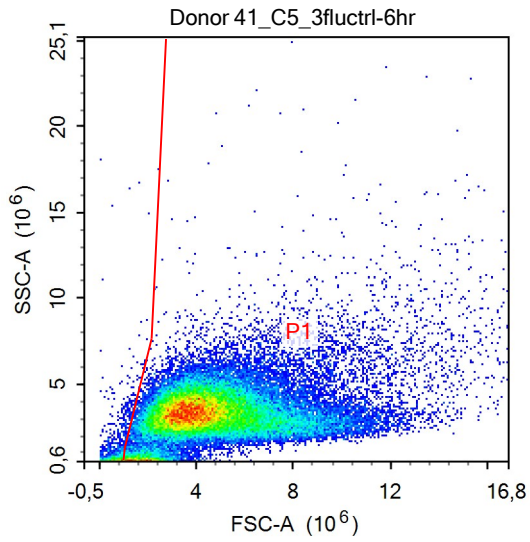

| Gate | Count   | % All   |
|------|---------|---------|
| All  | 128.407 | 100,00% |
| P1   | 68.169  | 53,09%  |

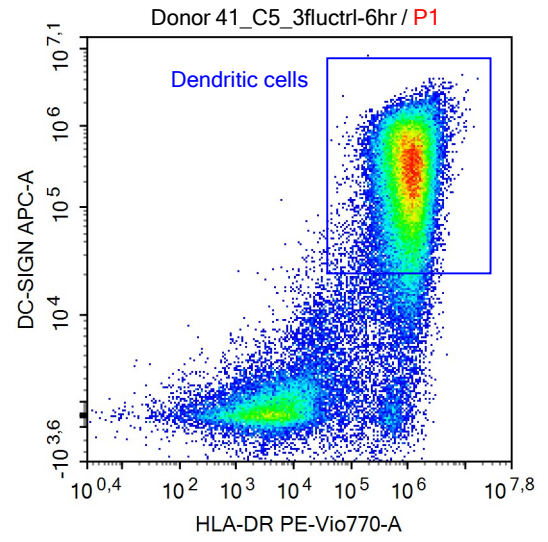

| Gate            | Count  | % P1    |
|-----------------|--------|---------|
| P1              | 68.169 | 100,00% |
| Dendritic cells | 45.622 | 66,92%  |

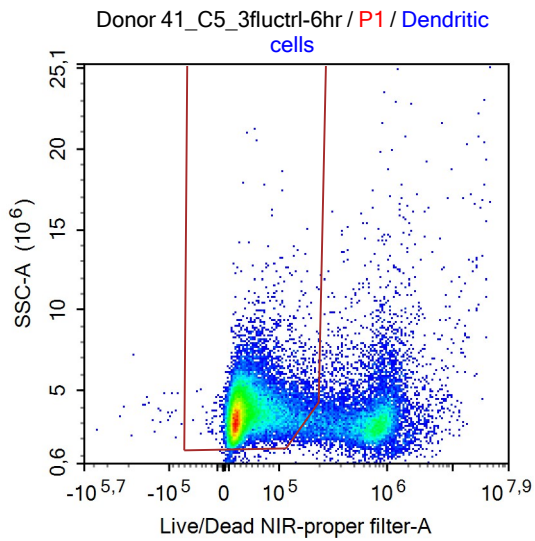

| Gate            | Count  | % Dendritic cells |
|-----------------|--------|-------------------|
| Dendritic cells | 45.622 | 100,00%           |
| Live            | 35.635 | 78,11%            |

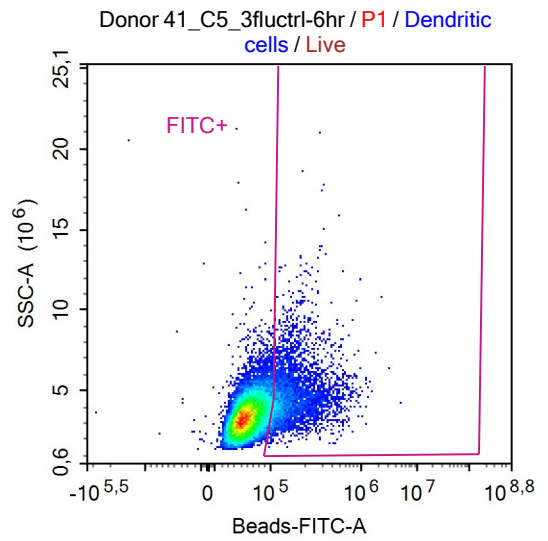

| Gate  | Count  | % Live  |
|-------|--------|---------|
| Live  | 35.635 | 100,00% |
| FITC+ | 4.791  | 13,44%  |

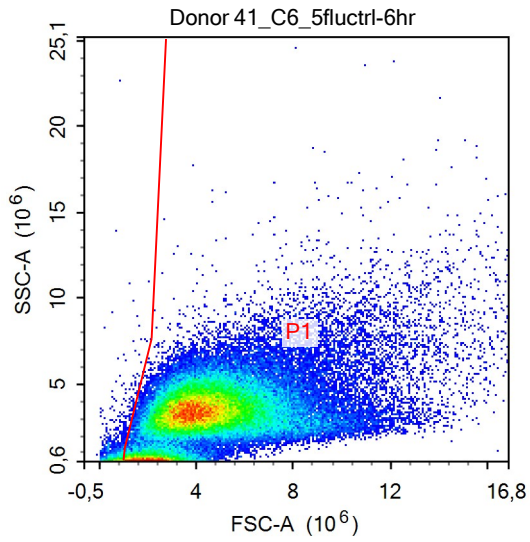

| Gate | Count   | % All   |
|------|---------|---------|
| All  | 231.064 | 100,00% |
| P1   | 123.309 | 53,37%  |

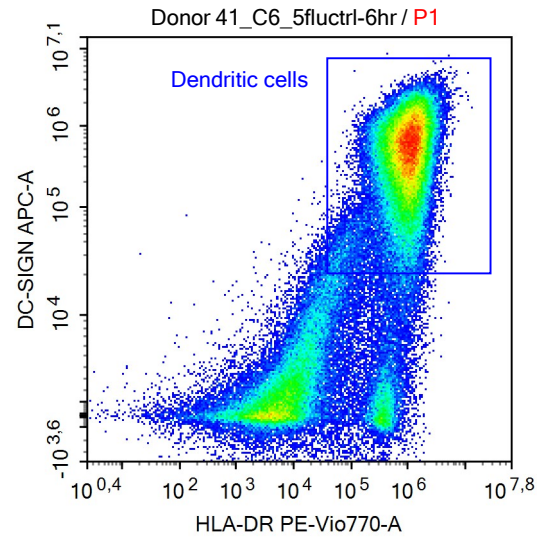

| Gate            | Count   | % P1    |
|-----------------|---------|---------|
| P1              | 123.309 | 100,00% |
| Dendritic cells | 72.491  | 58,79%  |

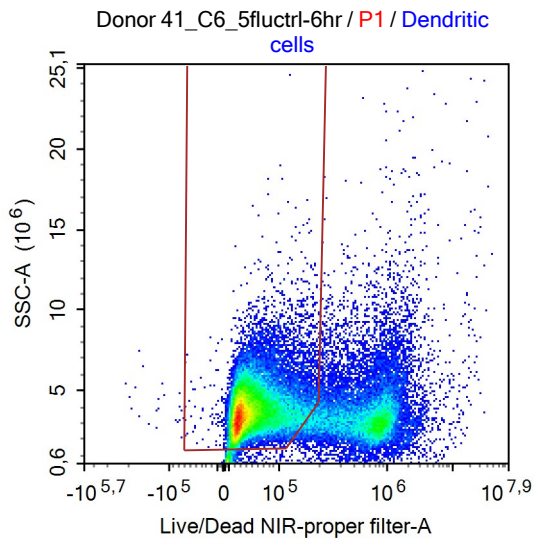

| Gate            | Count  | % Dendritic cells |
|-----------------|--------|-------------------|
| Dendritic cells | 72.491 | 100,00%           |
| Live            | 52.039 | 71,79%            |

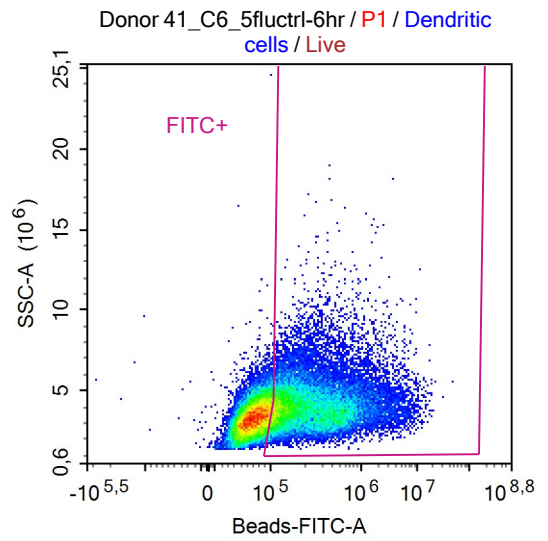

| Gate  | Count  | % Live  |
|-------|--------|---------|
| Live  | 52.039 | 100,00% |
| FITC+ | 26.248 | 50,44%  |

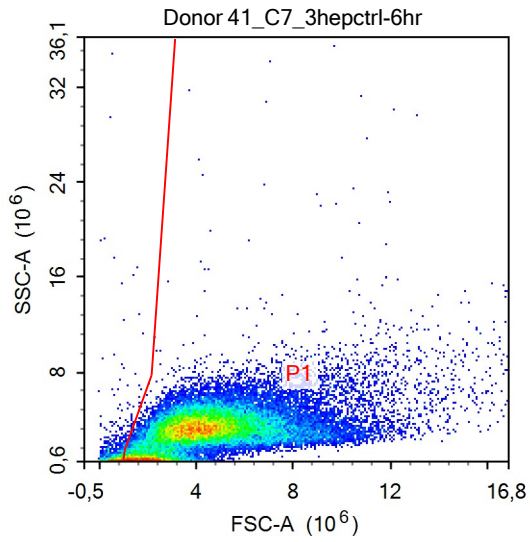

| Gate | Count   | % All   |
|------|---------|---------|
| All  | 137.421 | 100,00% |
| P1   | 68.452  | 49,81%  |

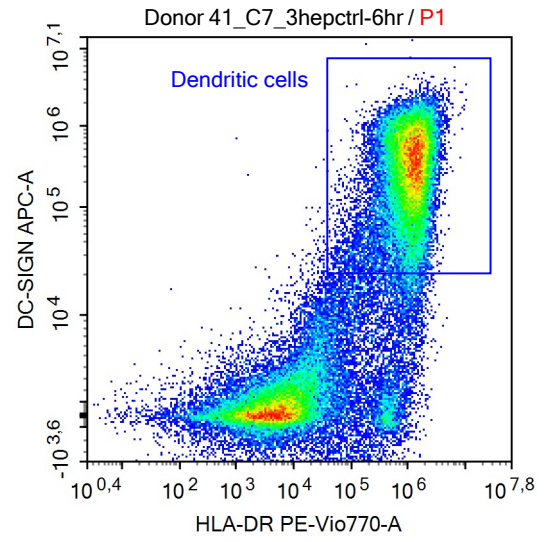

| Gate            | Count  | % P1    |
|-----------------|--------|---------|
| P1              | 68.452 | 100,00% |
| Dendritic cells | 31.129 | 45,48%  |

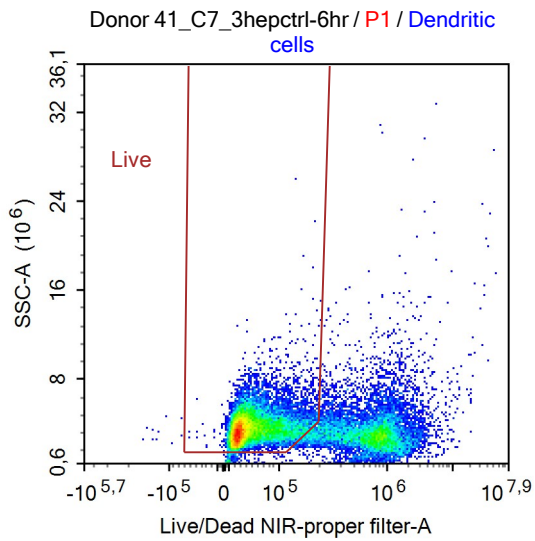

| Gate            | Count  | % Dendritic cells |
|-----------------|--------|-------------------|
| Dendritic cells | 31.129 | 100,00%           |
| Live            | 20.316 | 65,26%            |

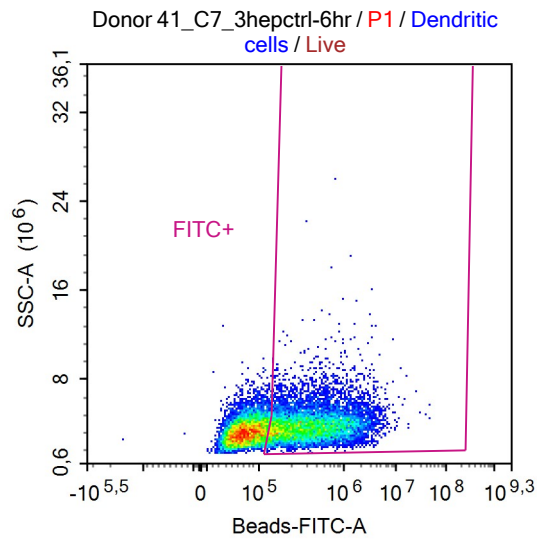

| Gate  | Count  | % Live  |
|-------|--------|---------|
| Live  | 20.316 | 100,00% |
| FITC+ | 10.267 | 50,54%  |

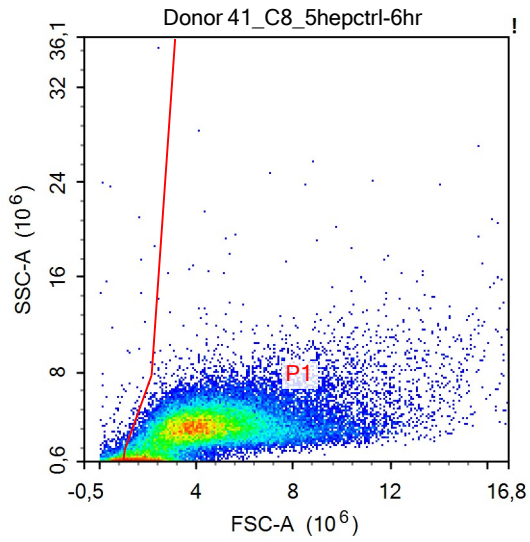

| Gate | Count   | % All   |
|------|---------|---------|
| All  | 123.556 | 100,00% |
| P1   | 59.958  | 48,53%  |

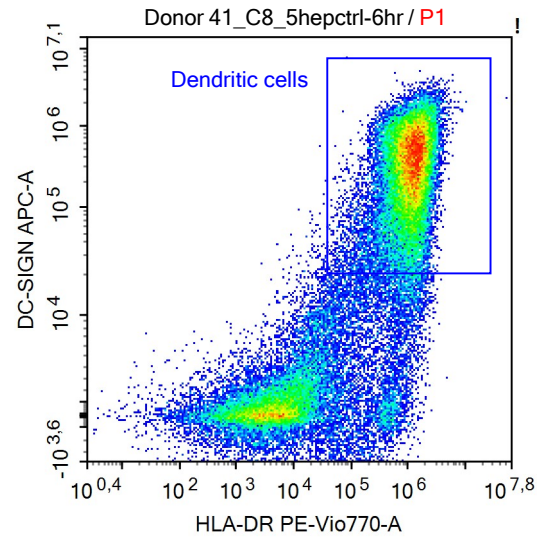

| Gate            | Count  | % P1    |
|-----------------|--------|---------|
| P1              | 59.958 | 100,00% |
| Dendritic cells | 30.856 | 51,46%  |

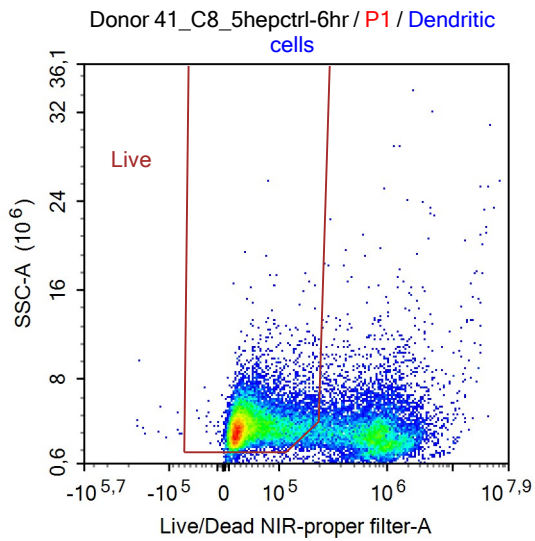

| Gate            | Count  | % Dendritic cells |
|-----------------|--------|-------------------|
| Dendritic cells | 30.856 | 100,00%           |
| Live            | 20.336 | 65,91%            |

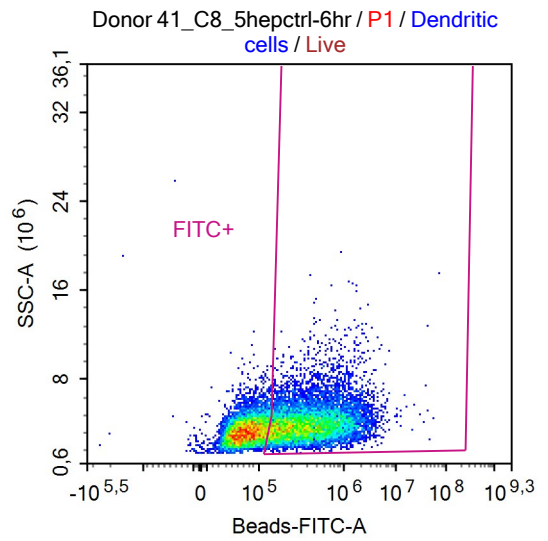

| Gate  | Count  | % Live  |
|-------|--------|---------|
| Live  | 20.336 | 100,00% |
| FITC+ | 11.399 | 56,05%  |



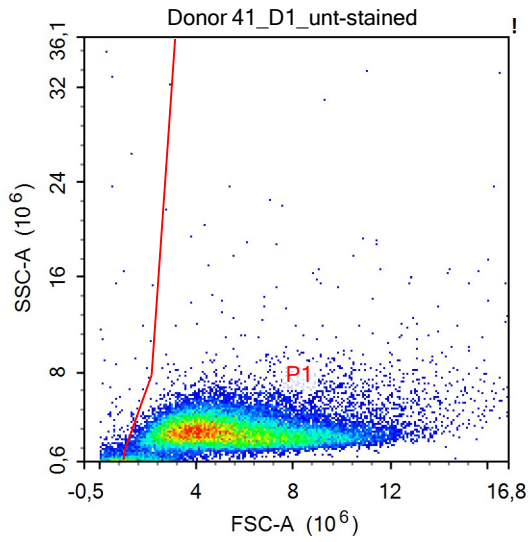

| Gate | Count  | % All   |
|------|--------|---------|
| All  | 75.255 | 100,00% |
| P1   | 33.684 | 44,76%  |

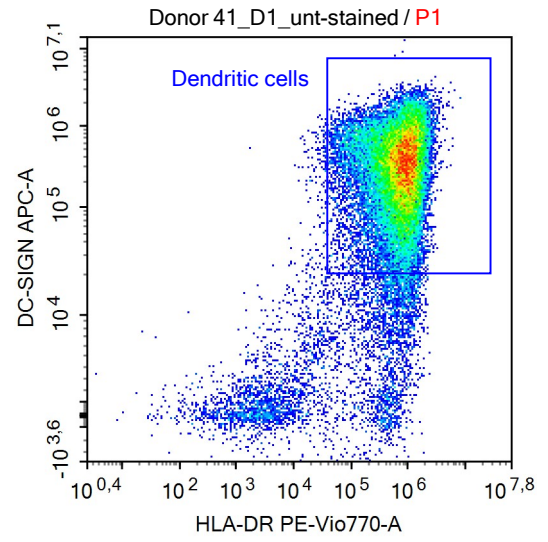

| Gate            | Count  | % P1    |
|-----------------|--------|---------|
| P1              | 33.684 | 100,00% |
| Dendritic cells | 28.541 | 84,73%  |

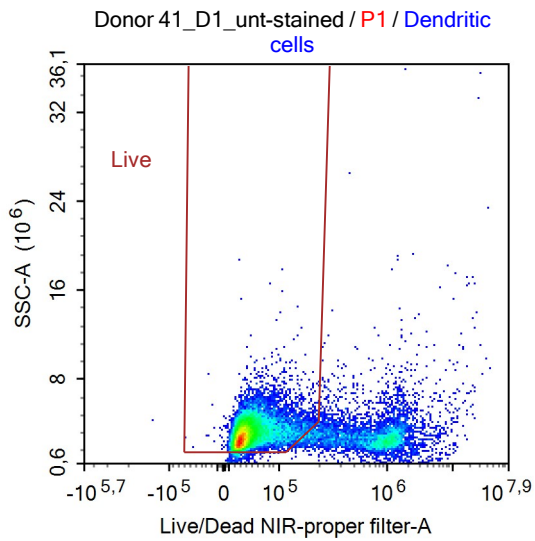

| Gate            | Count  | % Dendritic cells |
|-----------------|--------|-------------------|
| Dendritic cells | 28.541 | 100,00%           |
| Live            | 22.672 | 79,44%            |

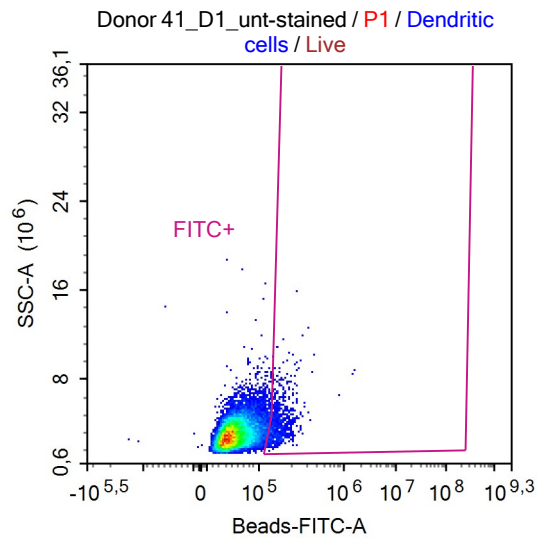

| Gate  | Count  | % Live  |
|-------|--------|---------|
| Live  | 22.672 | 100,00% |
| FITC+ | 653    | 2,88%   |

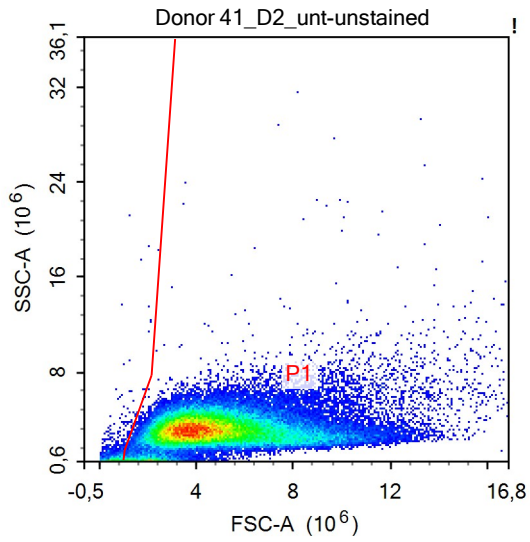

| Gate | Count   | % All   |
|------|---------|---------|
| All  | 144.242 | 100,00% |
| P1   | 80.192  | 55,60%  |

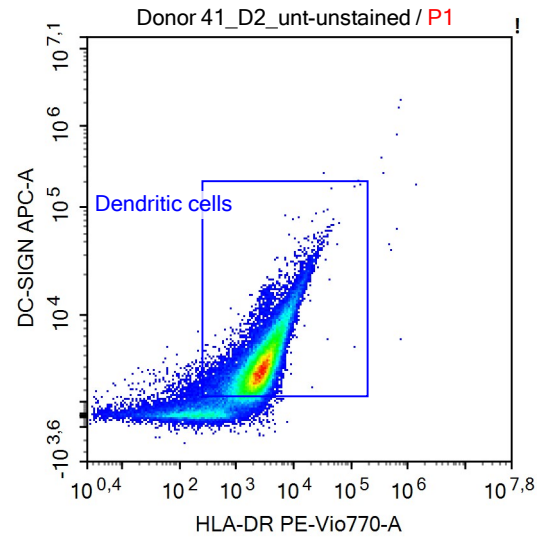

| Gate            | Count  | % P1    |
|-----------------|--------|---------|
| P1              | 80.192 | 100,00% |
| Dendritic cells | 63.025 | 78,59%  |

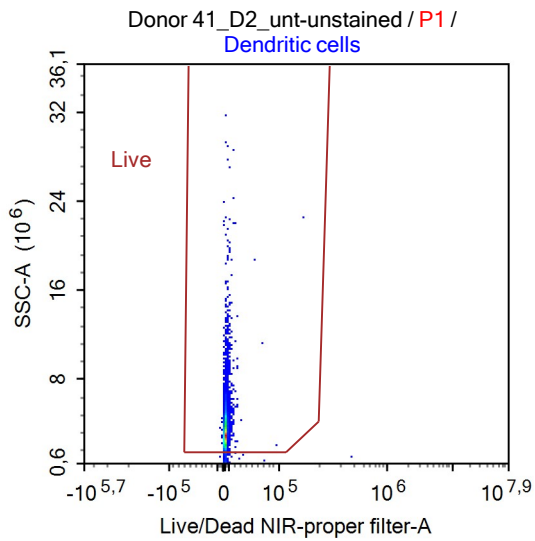

| Gate            | Count  | % Dendritic cells |
|-----------------|--------|-------------------|
| Dendritic cells | 63.025 | 100,00%           |
| Live            | 61.139 | 97,01%            |

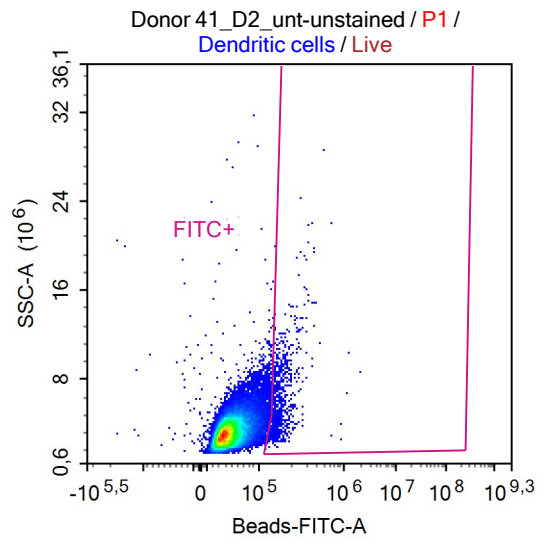

| Gate  | Count  | % Live  |
|-------|--------|---------|
| Live  | 61.139 | 100,00% |
| FITC+ | 628    | 1,03%   |

# Donor 41 FLU

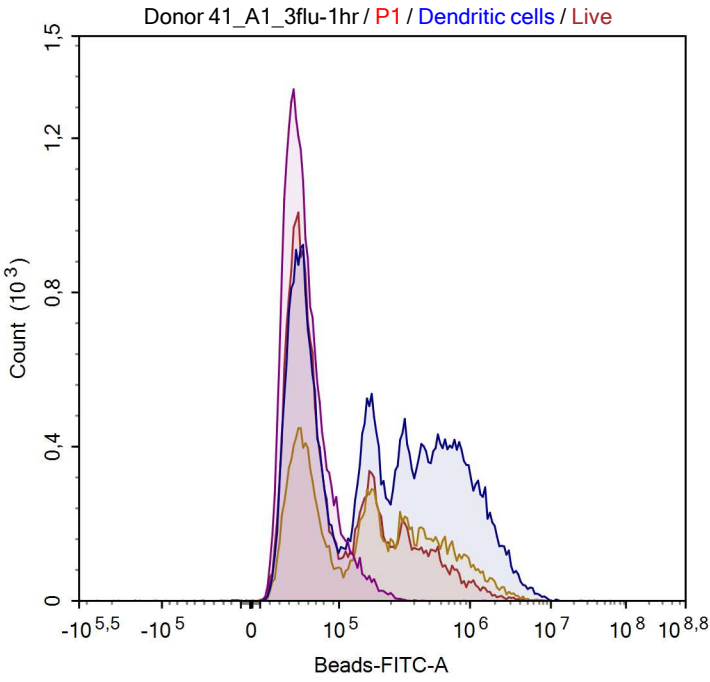

| # | Sample                | Gate  | Count  | Mean X  | Median X |
|---|-----------------------|-------|--------|---------|----------|
| 1 | Donor 41_A1_3flu-1hr  | Live  | 23.634 | 166.437 | 66.929   |
| 2 | Donor 41_B1_3flu-3hr  | Live* | 17.286 | 305.275 | 141.863  |
| 3 | Donor 41_C1_3flu-6hr  | Live* | 38.209 | 438.813 | 163.632  |
| 4 | Donor 41_D1_untreated | Live* | 22.672 | 58.710  | 51.792   |

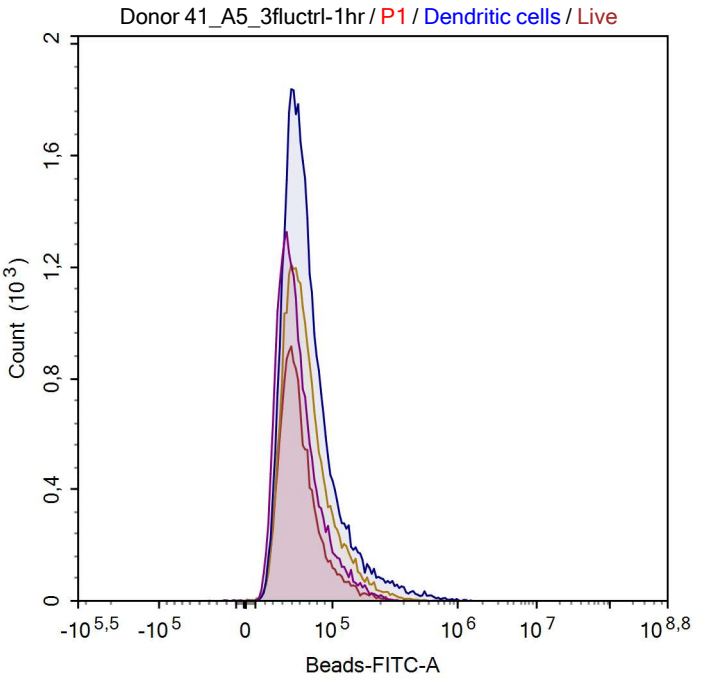

| # | Sample                   | Gate  | Count  | Mean X | Median X |
|---|--------------------------|-------|--------|--------|----------|
| 1 | Donor 41_A5_3fluctrl-1hr | Live  | 14.842 | 60.712 | 54.550   |
| 2 | Donor 41_B5_3fluctrl-3hr | Live* | 23.919 | 70.551 | 61.224   |
| 3 | Donor 41_C5_3fluctrl-6hr | Live* | 35.635 | 76.946 | 61.943   |
| 4 | Donor 41_D1_untreated    | Live* | 22.672 | 58.710 | 51.792   |

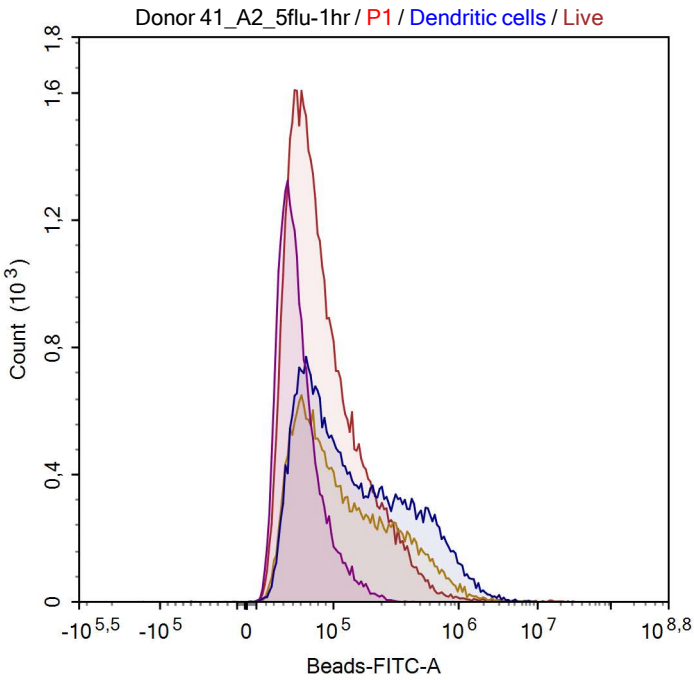

| # | Sample                | Gate  | Count  | Mean X  | Median X |
|---|-----------------------|-------|--------|---------|----------|
| 1 | Donor 41_A2_5flu-1hr  | Live  | 46.372 | 119.571 | 75.532   |
| 2 | Donor 41_B2_5flu-3hr  | Live* | 24.534 | 184.427 | 98.399   |
| 3 | Donor 41_C2_5flu-6hr  | Live* | 32.444 | 235.225 | 114.565  |
| 4 | Donor 41_D1_untreated | Live* | 22.672 | 58.710  | 51.792   |

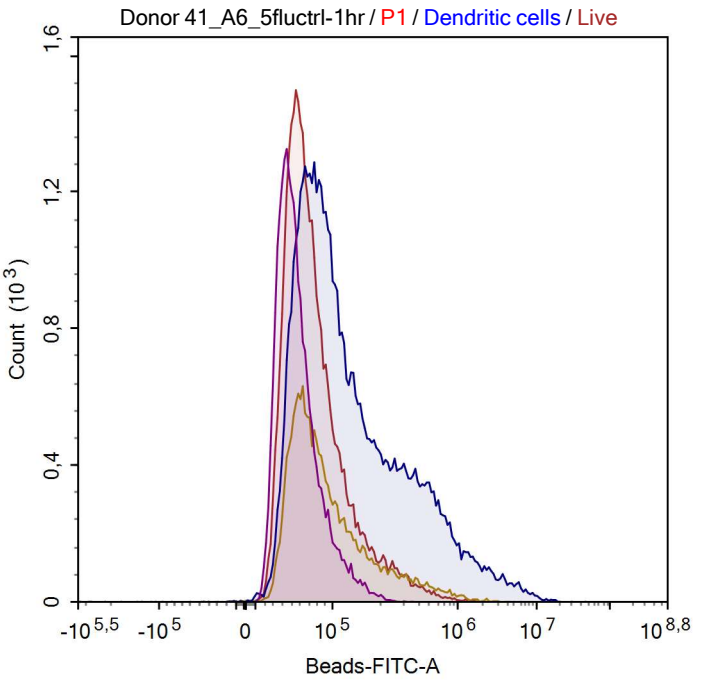

| # | Sample                   | Gate  | Count  | Mean X  | Median X |
|---|--------------------------|-------|--------|---------|----------|
| 1 | Donor 41_A6_5fluctrl-1hr | Live  | 33.745 | 89.161  | 67.704   |
| 2 | Donor 41_B6_5fluctrl-3hr | Live* | 16.835 | 130.223 | 80.472   |
| 3 | Donor 41_C6_5fluctrl-6hr | Live* | 52.039 | 317.900 | 105.272  |
| 4 | Donor 41_D1_untreated    | Live* | 22.672 | 58.710  | 51.792   |

Donor 41 HEP

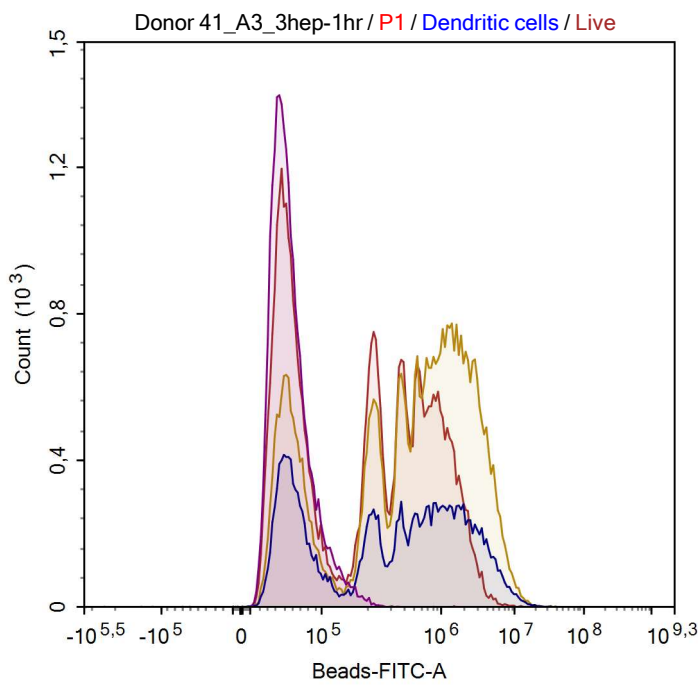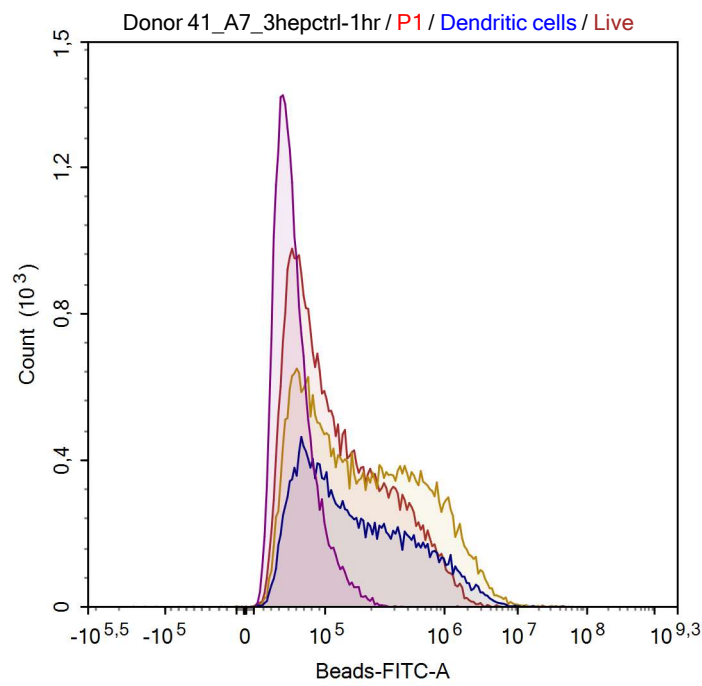

| # | Sample                | Gate  | Count  | Mean X    | Median X |
|---|-----------------------|-------|--------|-----------|----------|
| 1 | Donor 41_A3_3hep-1hr  | Live  | 43.371 | 458.628   | 213.817  |
| 2 | Donor 41_B3_3hep-3hr  | Live* | 45.130 | 1.241.238 | 564.413  |
| 3 | Donor 41_C3_3hep-6hr  | Live* | 20.978 | 1.072.366 | 360.326  |
| 4 | Donor 41_D1_unstained | Live* | 22.672 | 58.710    | 51.792   |

| # | Sample                   | Gate  | Count  | Mean X  | Median X |
|---|--------------------------|-------|--------|---------|----------|
| 1 | Donor 41_A7_3hepctrl-1hr | Live  | 35.329 | 207.910 | 99.927   |
| 2 | Donor 41_B7_3hepctrl-3hr | Live* | 34.231 | 445.877 | 153.892  |
| 3 | Donor 41_C7_3hepctrl-6hr | Live* | 20.316 | 357.293 | 131.236  |
| 4 | Donor 41_D1_unstained    | Live* | 22.672 | 58.710  | 51.792   |

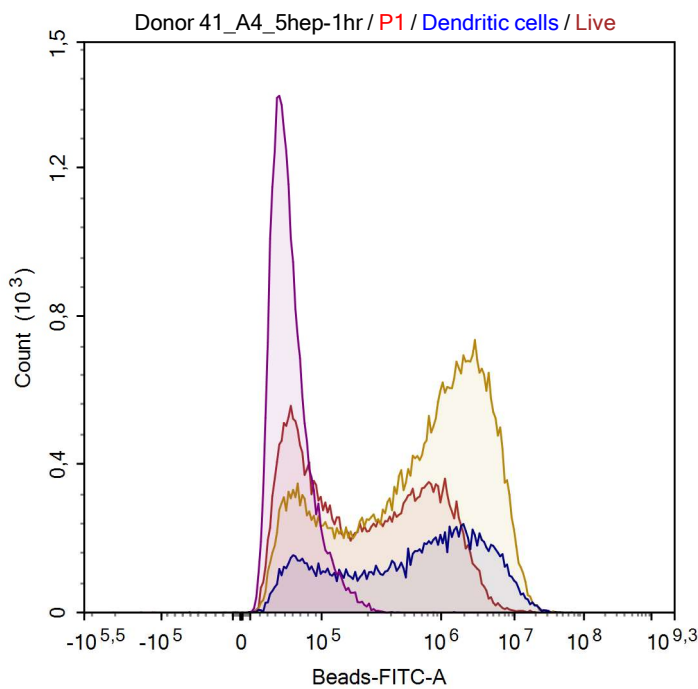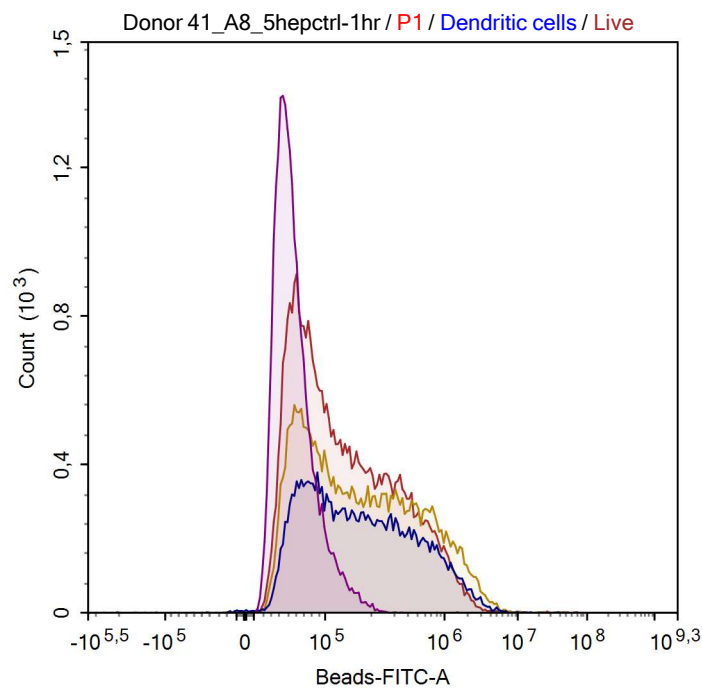

| # | Sample                | Gate  | Count  | Mean X    | Median X |
|---|-----------------------|-------|--------|-----------|----------|
| 1 | Donor 41_A4_5hep-1hr  | Live  | 28.309 | 534.985   | 180.202  |
| 2 | Donor 41_B4_5hep-3hr  | Live* | 41.972 | 1.888.229 | 818.344  |
| 3 | Donor 41_C4_5hep-6hr  | Live* | 15.764 | 1.852.649 | 611.403  |
| 4 | Donor 41_D1_unstained | Live* | 22.672 | 58.710    | 51.792   |

| # | Sample                   | Gate  | Count  | Mean X  | Median X |
|---|--------------------------|-------|--------|---------|----------|
| 1 | Donor 41_A8_5hepctrl-1hr | Live  | 35.273 | 250.852 | 111.908  |
| 2 | Donor 41_B8_5hepctrl-3hr | Live* | 28.439 | 404.303 | 148.545  |
| 3 | Donor 41_C8_5hepctrl-6hr | Live* | 20.336 | 363.463 | 152.320  |
| 4 | Donor 41_D1_unstained    | Live* | 22.672 | 58.710  | 51.792   |
