# Supplementary material for: Assessing the Immunomodulatory Effect of Size on the Uptake and Immunogenicity of Influenza- and Hepatitis B Subunit Vaccines In Vitro
Source: MDPI journal article supplement (doi:10.3390/ph15070887), 2022-07-18
Supplement: s1 [file s1]

# Report of Donor 31

Specimen Name: Donor 31

Run Time: 26-1-2022 10:53

Cytometer: NovoCyte Quanteon 621200611403

Software: NovoExpress 1.5.6

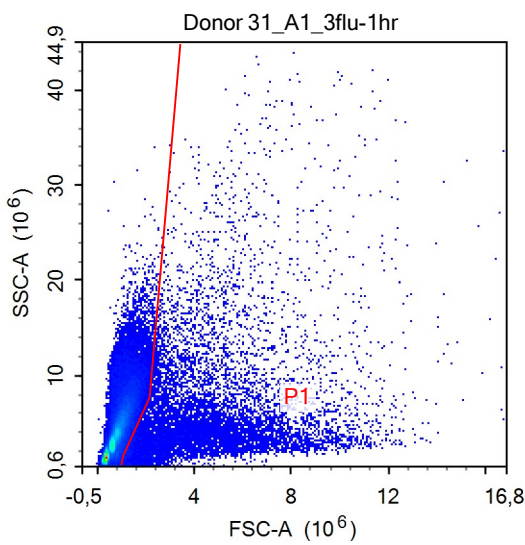

| Gate | Count   | % All   |
|------|---------|---------|
| All  | 347.055 | 100,00% |
| P1   | 12.261  | 3,53%   |

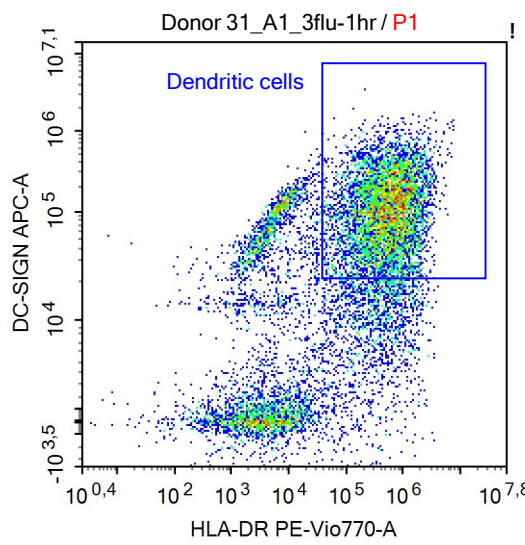

| Gate            | Count  | % P1    |
|-----------------|--------|---------|
| P1              | 12.261 | 100,00% |
| Dendritic cells | 6.237  | 50,87%  |

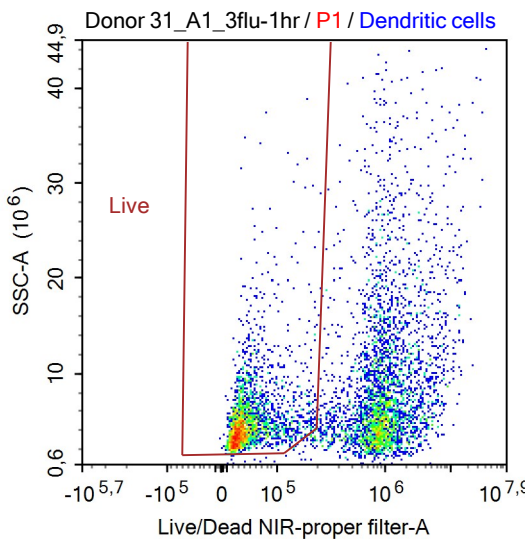

| Gate            | Count | % Dendritic cells |
|-----------------|-------|-------------------|
| Dendritic cells | 6.237 | 100,00%           |
| Live            | 2.712 | 43,48%            |

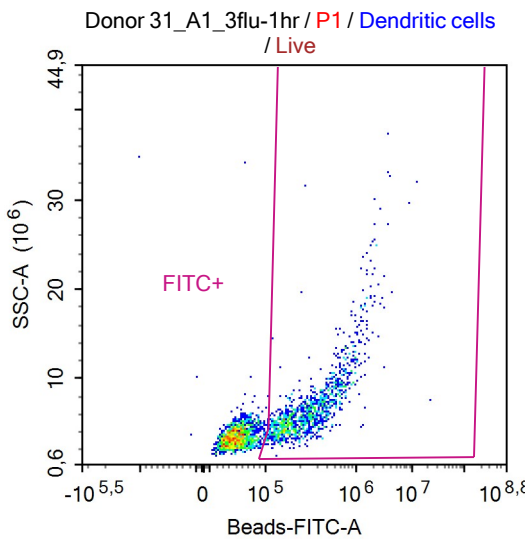

| Gate  | Count | % Live  |
|-------|-------|---------|
| Live  | 2.712 | 100,00% |
| FITC+ | 1.298 | 47,86%  |

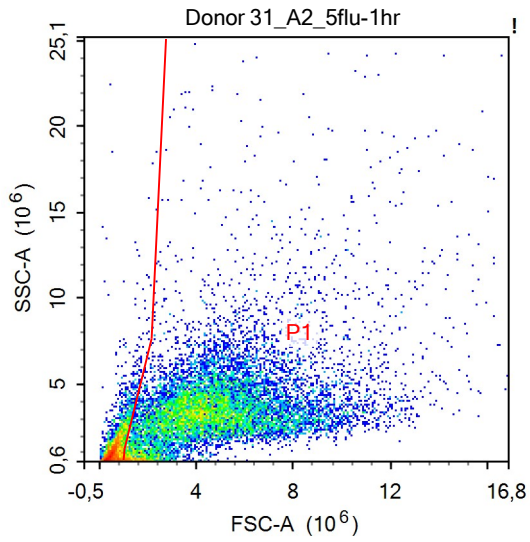

| Gate | Count  | % All   |
|------|--------|---------|
| All  | 42.558 | 100,00% |
| P1   | 15.942 | 37,46%  |

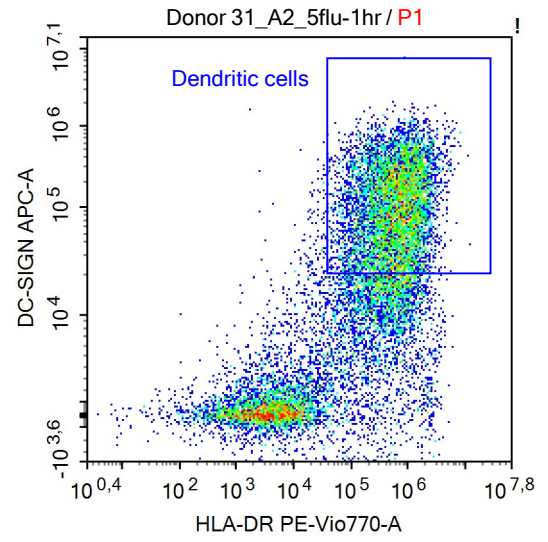

| Gate            | Count  | % P1    |
|-----------------|--------|---------|
| P1              | 15.942 | 100,00% |
| Dendritic cells | 7.228  | 45,34%  |

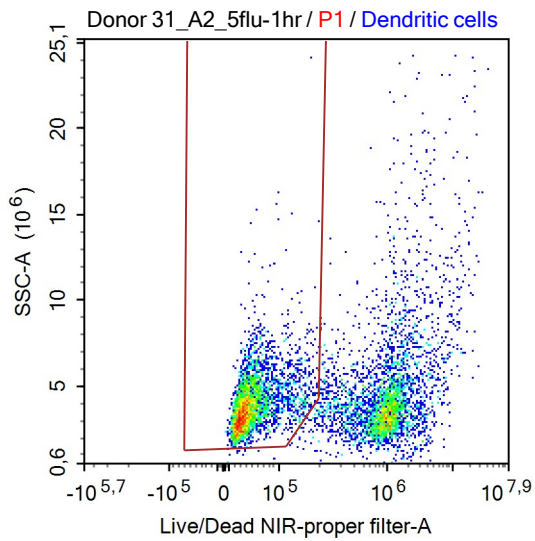

| Gate            | Count | % Dendritic cells |
|-----------------|-------|-------------------|
| Dendritic cells | 7.228 | 100,00%           |
| Live            | 3.667 | 50,73%            |

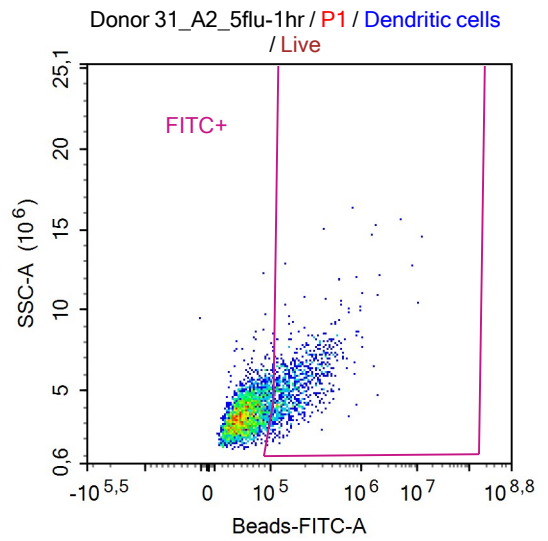

| Gate  | Count | % Live  |
|-------|-------|---------|
| Live  | 3.667 | 100,00% |
| FITC+ | 880   | 24,00%  |

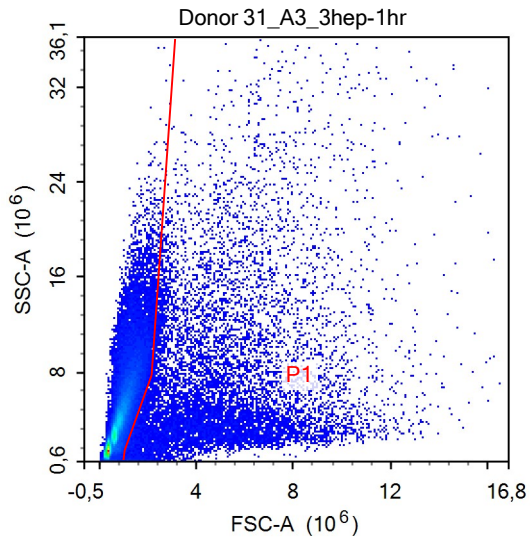

| Gate | Count   | % All   |
|------|---------|---------|
| All  | 313.458 | 100,00% |
| P1   | 14.858  | 4,74%   |

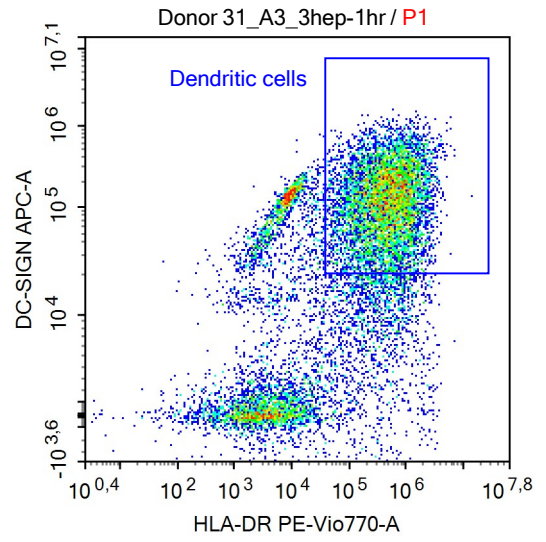

| Gate            | Count  | % P1    |
|-----------------|--------|---------|
| P1              | 14.858 | 100,00% |
| Dendritic cells | 7.441  | 50,08%  |

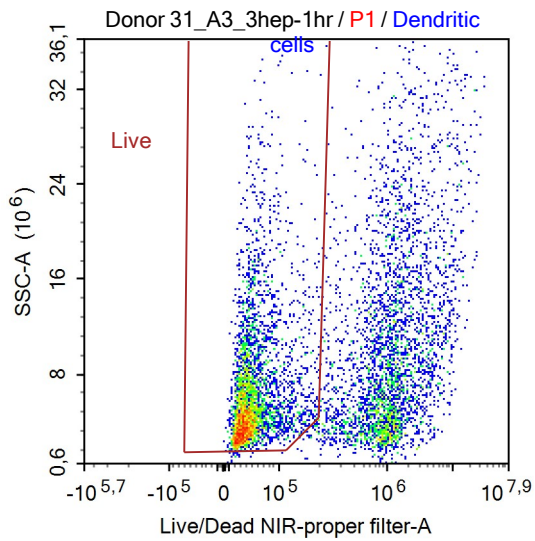

| Gate            | Count | % Dendritic cells |
|-----------------|-------|-------------------|
| Dendritic cells | 7.441 | 100,00%           |
| Live            | 3.874 | 52,06%            |

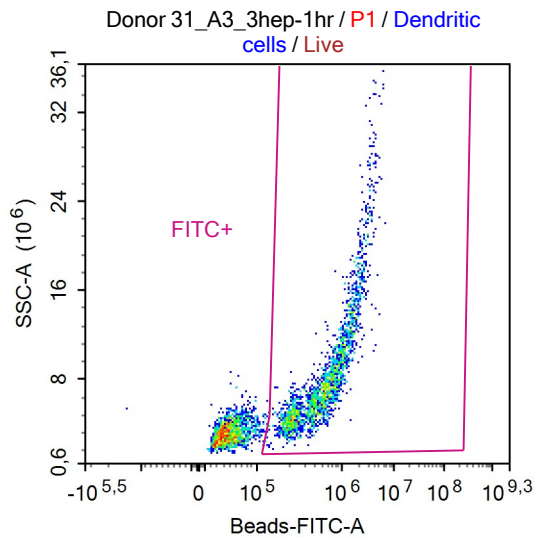

| Gate  | Count | % Live  |
|-------|-------|---------|
| Live  | 3.874 | 100,00% |
| FITC+ | 2.423 | 62,55%  |

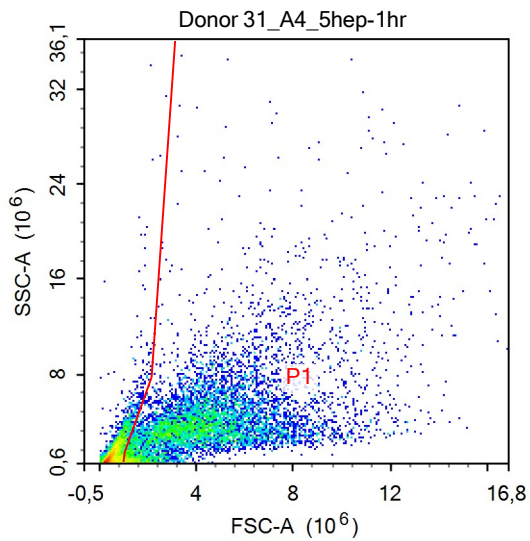

| Gate | Count  | % All   |
|------|--------|---------|
| All  | 34.394 | 100,00% |
| P1   | 9.887  | 28,75%  |

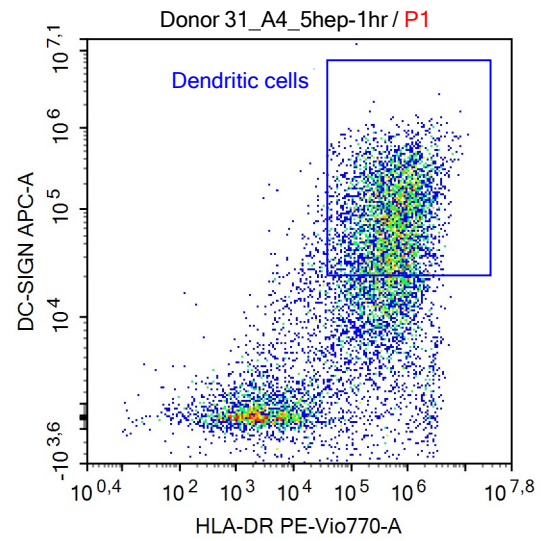

| Gate            | Count | % P1    |
|-----------------|-------|---------|
| P1              | 9.887 | 100,00% |
| Dendritic cells | 4.230 | 42,78%  |

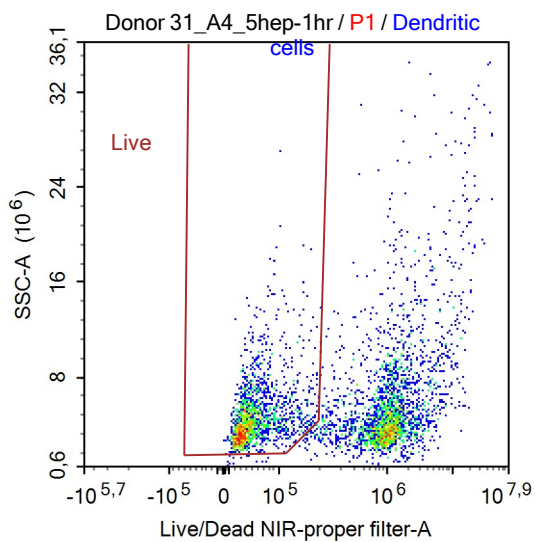

| Gate            | Count | % Dendritic cells |
|-----------------|-------|-------------------|
| Dendritic cells | 4.230 | 100,00%           |
| Live            | 1.757 | 41,54%            |

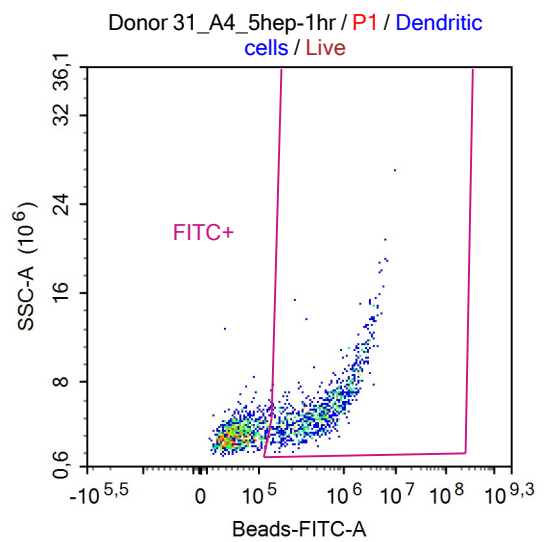

| Gate  | Count | % Live  |
|-------|-------|---------|
| Live  | 1.757 | 100,00% |
| FITC+ | 867   | 49,35%  |



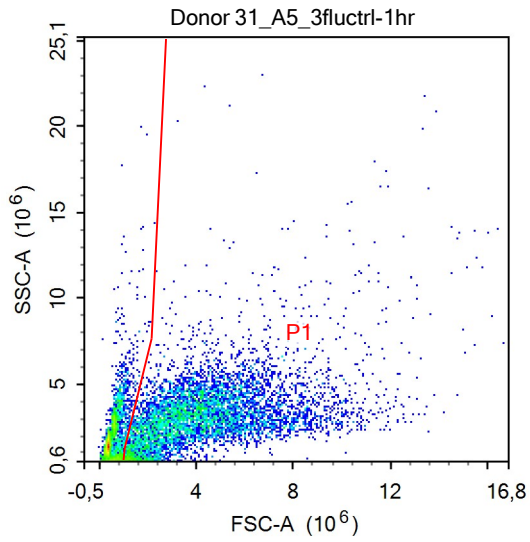

| Gate | Count  | % All   |
|------|--------|---------|
| All  | 32.586 | 100,00% |
| P1   | 9.361  | 28,73%  |

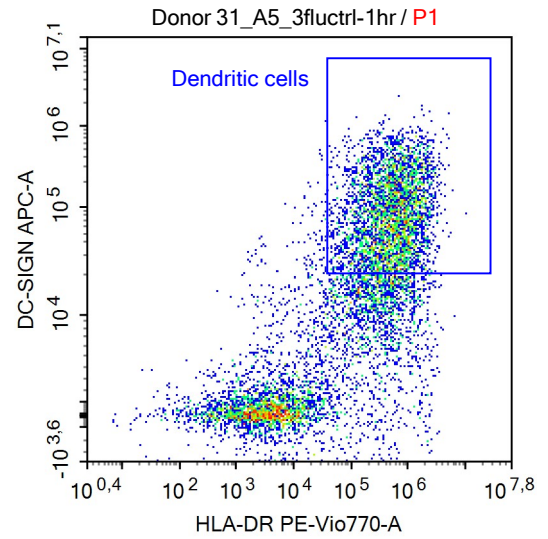

| Gate            | Count | % P1    |
|-----------------|-------|---------|
| P1              | 9.361 | 100,00% |
| Dendritic cells | 3.881 | 41,46%  |

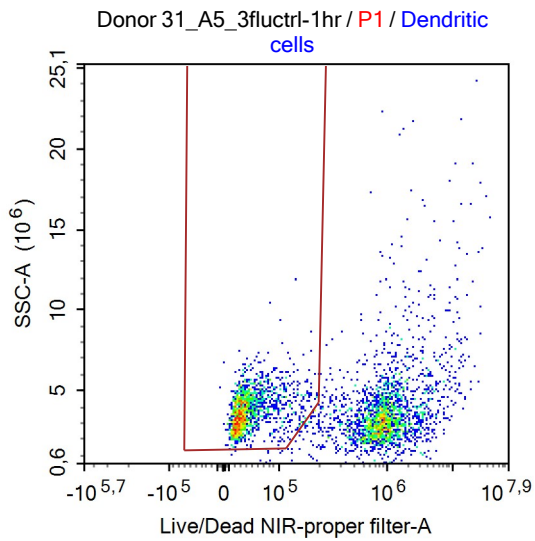

| Gate            | Count | % Dendritic cells |
|-----------------|-------|-------------------|
| Dendritic cells | 3.881 | 100,00%           |
| Live            | 1.654 | 42,62%            |

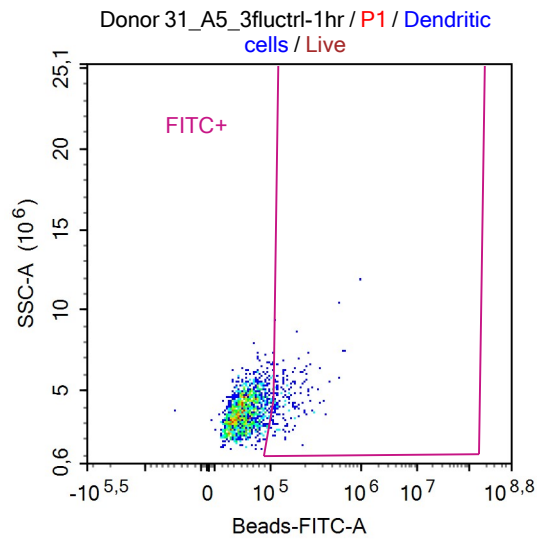

| Gate  | Count | % Live  |
|-------|-------|---------|
| Live  | 1.654 | 100,00% |
| FITC+ | 165   | 9,98%   |

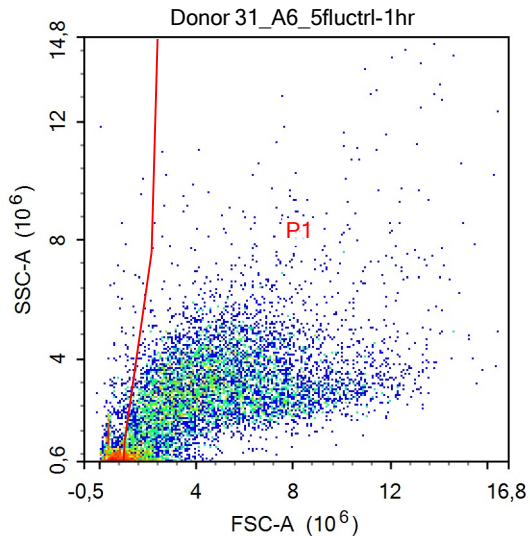

| Gate | Count  | % All   |
|------|--------|---------|
| All  | 33.577 | 100,00% |
| P1   | 12.458 | 37,10%  |

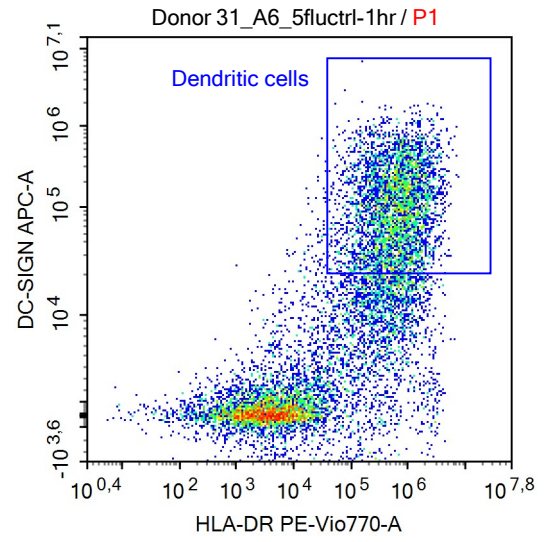

| Gate            | Count  | % P1    |
|-----------------|--------|---------|
| P1              | 12.458 | 100,00% |
| Dendritic cells | 4.133  | 33,18%  |

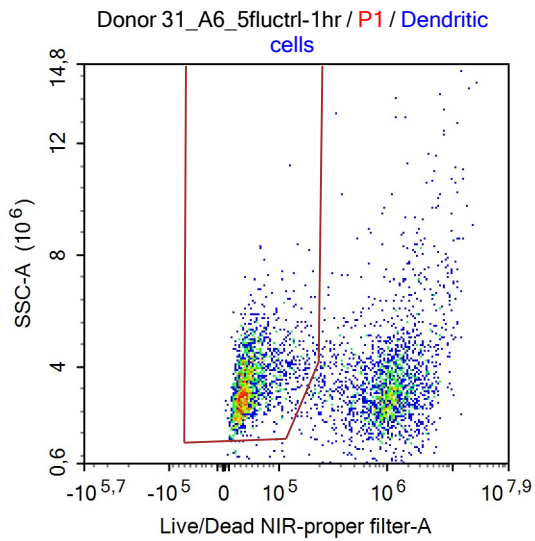

| Gate            | Count | % Dendritic cells |
|-----------------|-------|-------------------|
| Dendritic cells | 4.133 | 100,00%           |
| Live            | 2.022 | 48,92%            |

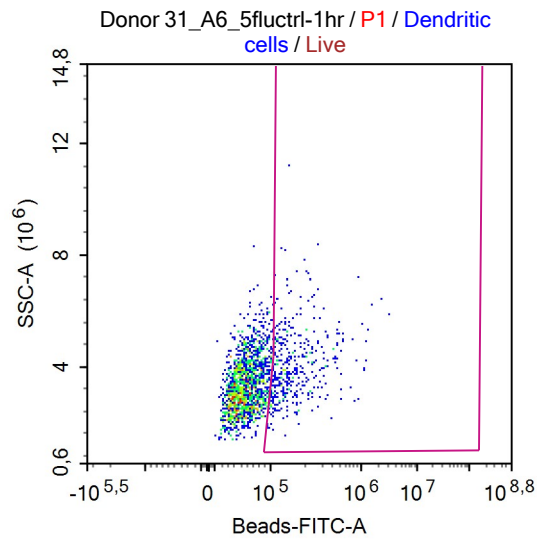

| Gate  | Count | % Live  |
|-------|-------|---------|
| Live  | 2.022 | 100,00% |
| FITC+ | 389   | 19,24%  |

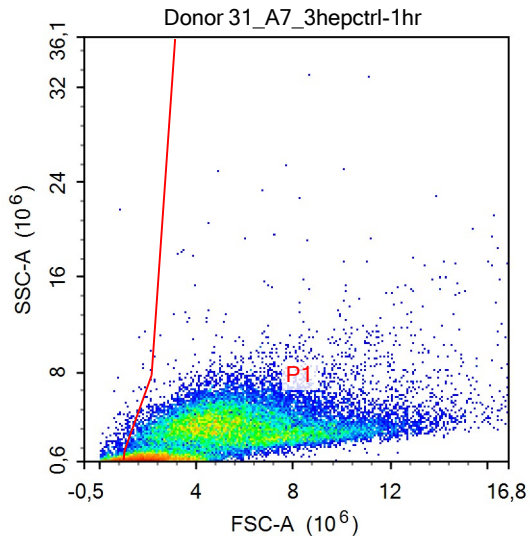

| Gate | Count  | % All   |
|------|--------|---------|
| All  | 80.529 | 100,00% |
| P1   | 44.120 | 54,79%  |

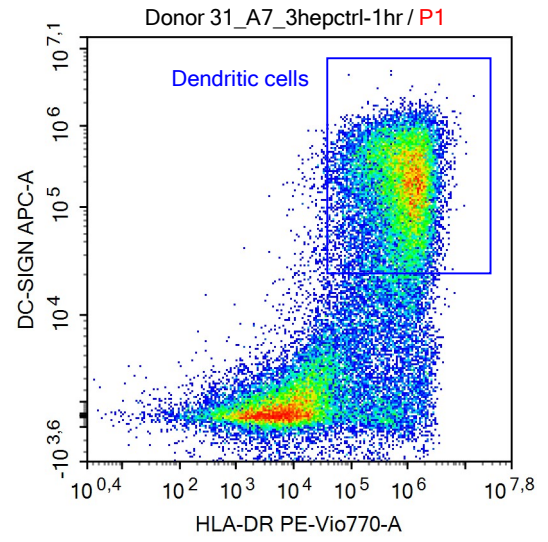

| Gate            | Count  | % P1    |
|-----------------|--------|---------|
| P1              | 44.120 | 100,00% |
| Dendritic cells | 18.451 | 41,82%  |

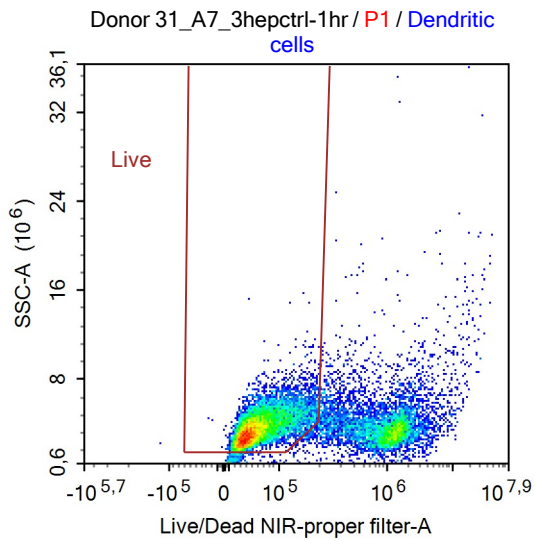

| Gate            | Count  | % Dendritic cells |
|-----------------|--------|-------------------|
| Dendritic cells | 18.451 | 100,00%           |
| Live            | 11.733 | 63,59%            |

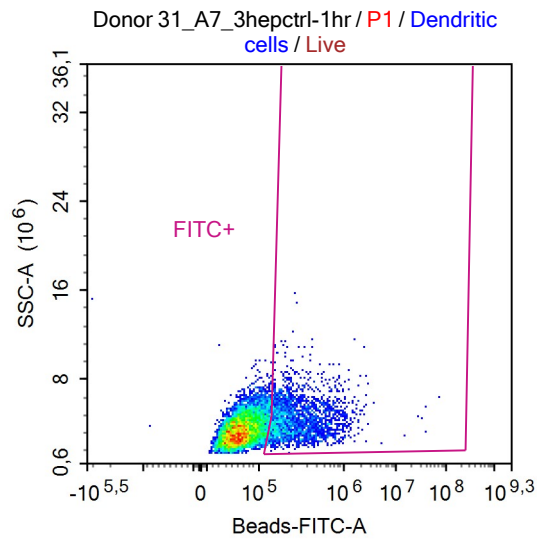

| Gate  | Count  | % Live  |
|-------|--------|---------|
| Live  | 11.733 | 100,00% |
| FITC+ | 2.261  | 19,27%  |

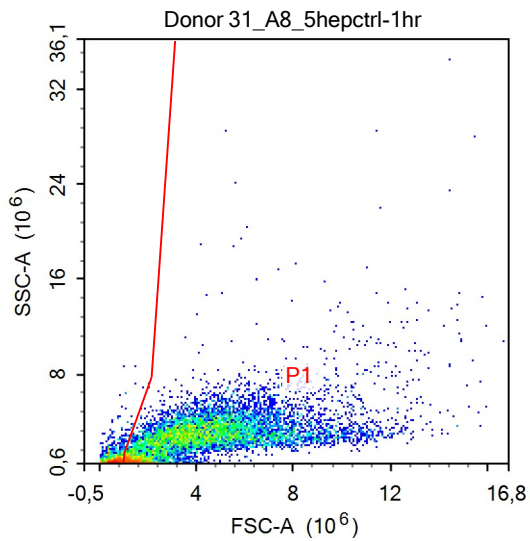

| Gate | Count  | % All   |
|------|--------|---------|
| All  | 32.843 | 100,00% |
| P1   | 11.805 | 35,94%  |

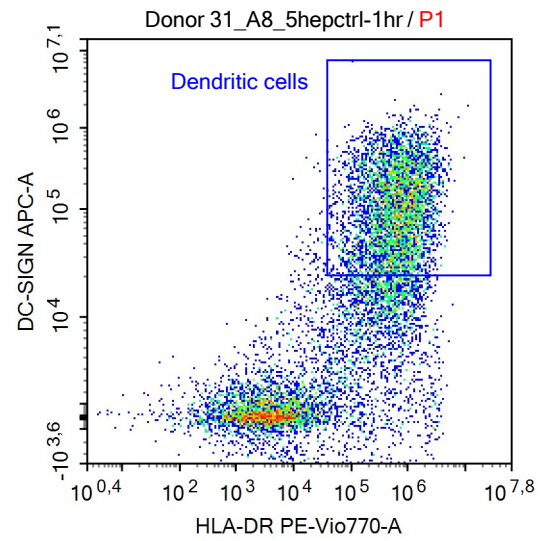

| Gate            | Count  | % P1    |
|-----------------|--------|---------|
| P1              | 11.805 | 100,00% |
| Dendritic cells | 4.566  | 38,68%  |

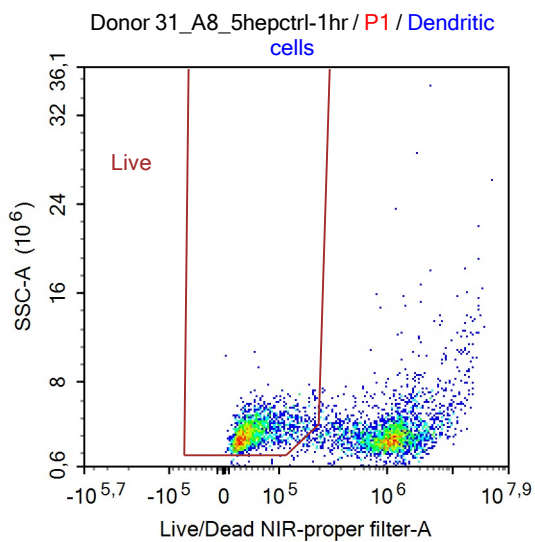

| Gate            | Count | % Dendritic cells |
|-----------------|-------|-------------------|
| Dendritic cells | 4.566 | 100,00%           |
| Live            | 1.903 | 41,68%            |

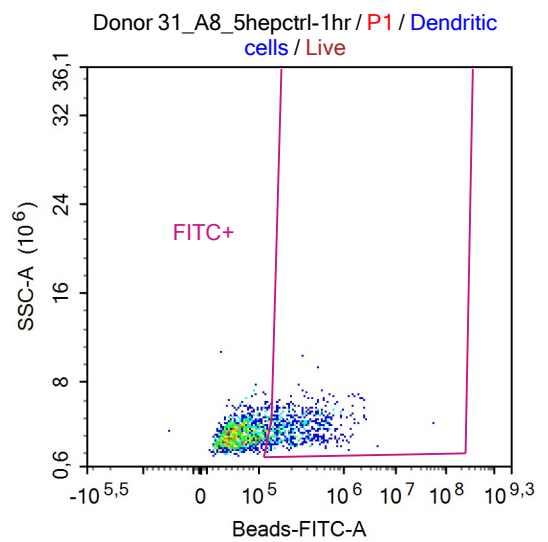

| Gate  | Count | % Live  |
|-------|-------|---------|
| Live  | 1.903 | 100,00% |
| FITC+ | 549   | 28,85%  |



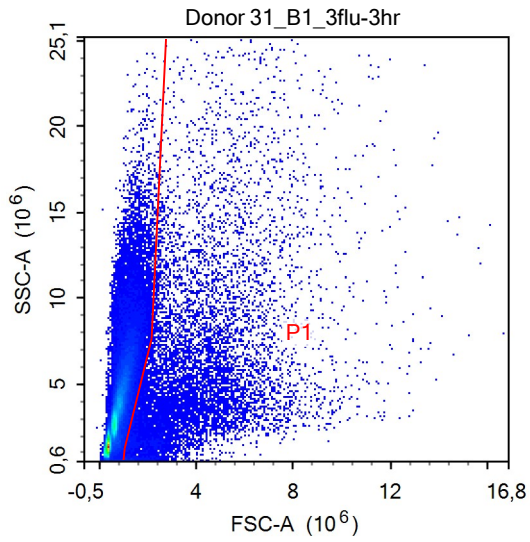

| Gate | Count   | % All   |
|------|---------|---------|
| All  | 399.998 | 100,00% |
| P1   | 18.216  | 4,55%   |

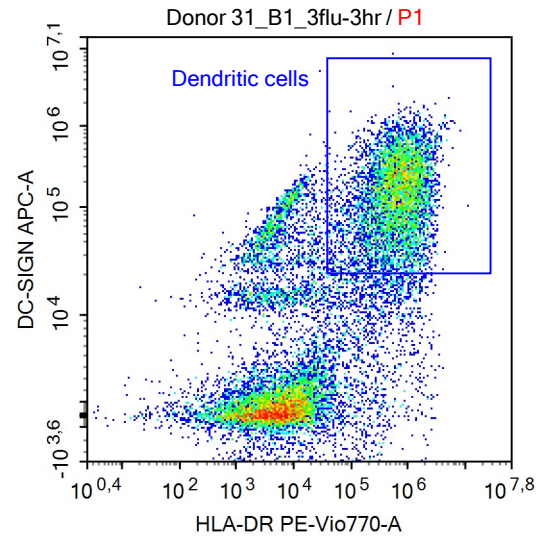

| Gate            | Count  | % P1    |
|-----------------|--------|---------|
| P1              | 18.216 | 100,00% |
| Dendritic cells | 6.116  | 33,57%  |

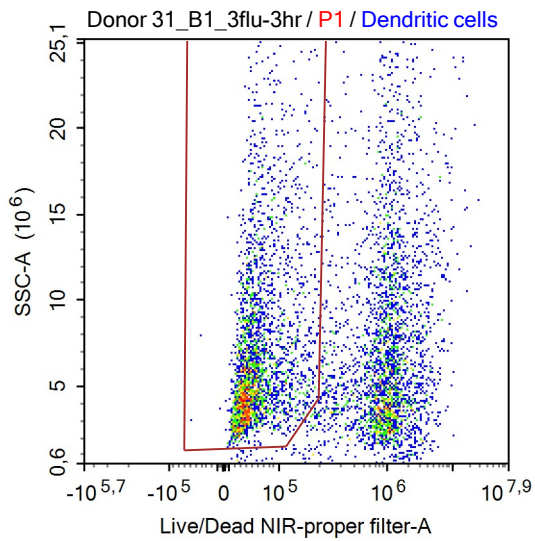

| Gate            | Count | % Dendritic cells |
|-----------------|-------|-------------------|
| Dendritic cells | 6.116 | 100,00%           |
| Live            | 2.944 | 48,14%            |

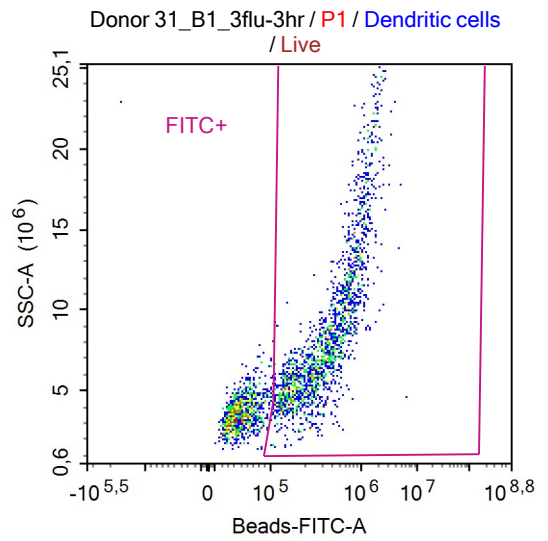

| Gate  | Count | % Live  |
|-------|-------|---------|
| Live  | 2.944 | 100,00% |
| FITC+ | 2.018 | 68,55%  |

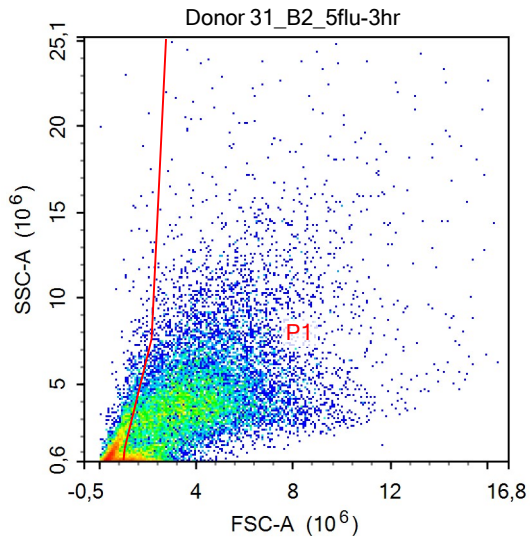

| Gate | Count  | % All   |
|------|--------|---------|
| All  | 65.707 | 100,00% |
| P1   | 25.179 | 38,32%  |

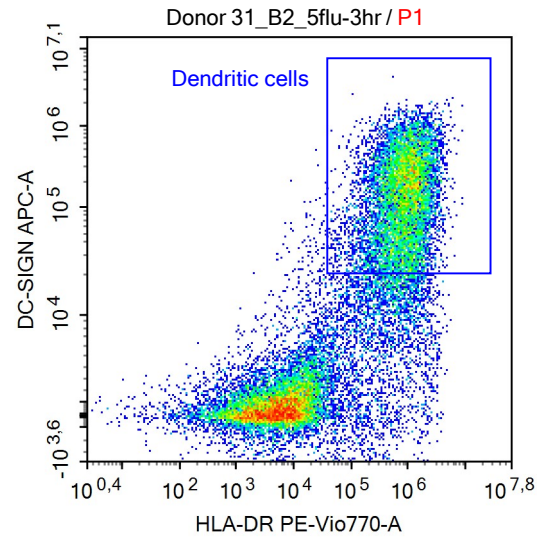

| Gate            | Count  | % P1    |
|-----------------|--------|---------|
| P1              | 25.179 | 100,00% |
| Dendritic cells | 9.342  | 37,10%  |

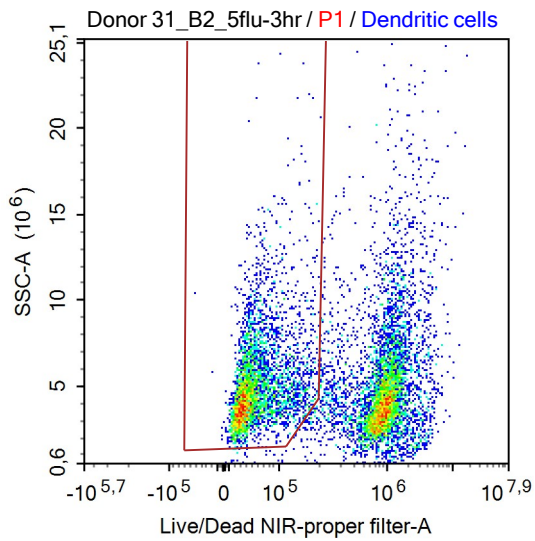

| Gate            | Count | % Dendritic cells |
|-----------------|-------|-------------------|
| Dendritic cells | 9.342 | 100,00%           |
| Live            | 4.055 | 43,41%            |

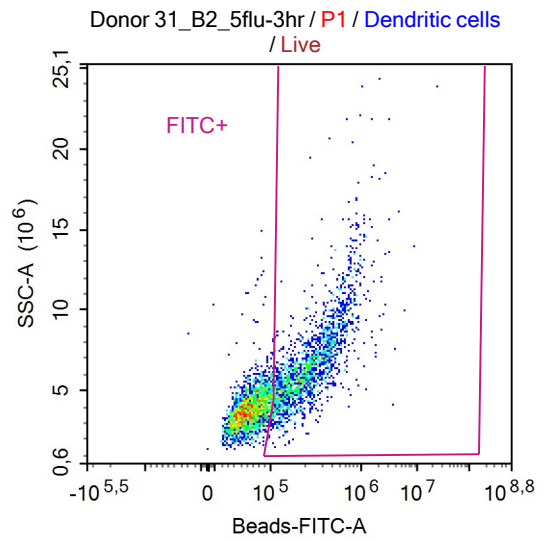

| Gate  | Count | % Live  |
|-------|-------|---------|
| Live  | 4.055 | 100,00% |
| FITC+ | 1.837 | 45,30%  |

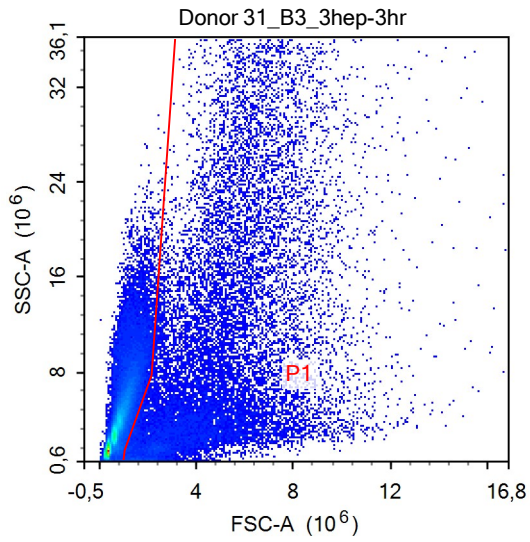

| Gate | Count   | % All   |
|------|---------|---------|
| All  | 362.506 | 100,00% |
| P1   | 36.556  | 10,08%  |

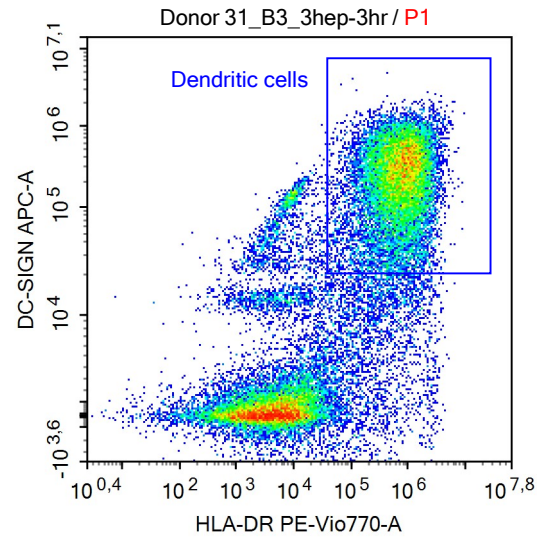

| Gate            | Count  | % P1    |
|-----------------|--------|---------|
| P1              | 36.556 | 100,00% |
| Dendritic cells | 15.553 | 42,55%  |

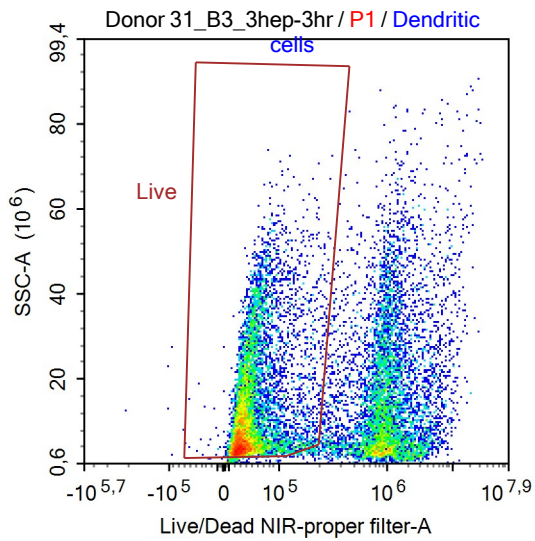

| Gate            | Count  | % Dendritic cells |
|-----------------|--------|-------------------|
| Dendritic cells | 15.553 | 100,00%           |
| Live            | 8.640  | 55,55%            |

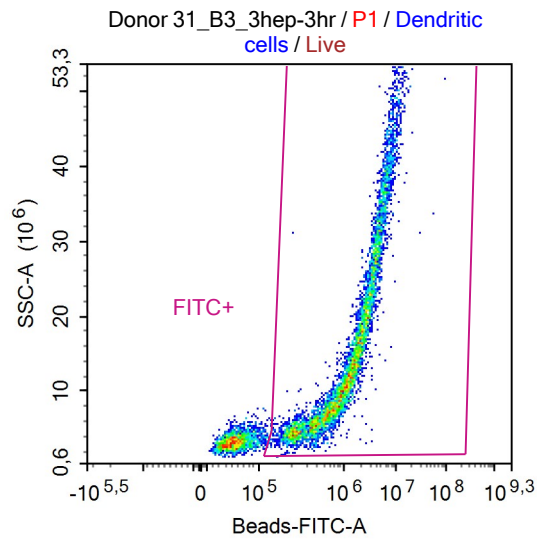

| Gate  | Count | % Live  |
|-------|-------|---------|
| Live  | 8.640 | 100,00% |
| FITC+ | 6.882 | 79,65%  |

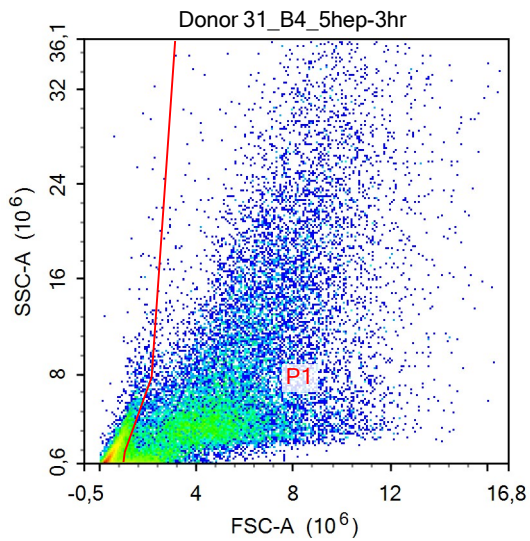

| Gate | Count  | % All   |
|------|--------|---------|
| All  | 90.156 | 100,00% |
| P1   | 32.177 | 35,69%  |

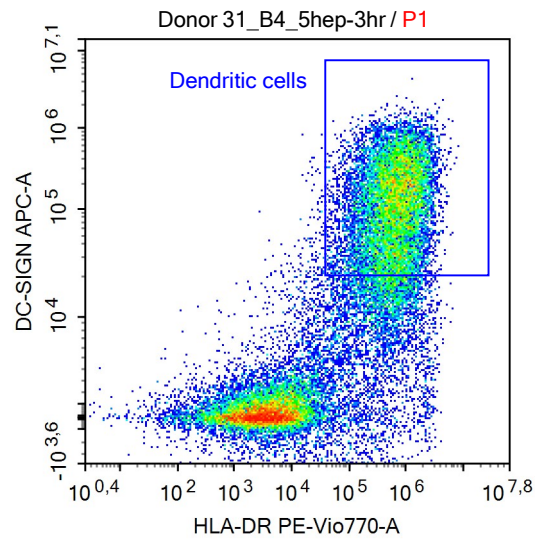

| Gate            | Count  | % P1    |
|-----------------|--------|---------|
| P1              | 32.177 | 100,00% |
| Dendritic cells | 12.870 | 40,00%  |

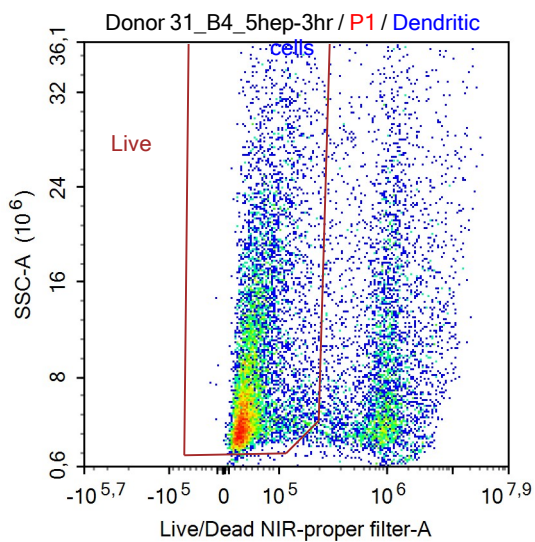

| Gate            | Count  | % Dendritic cells |
|-----------------|--------|-------------------|
| Dendritic cells | 12.870 | 100,00%           |
| Live            | 8.257  | 64,16%            |

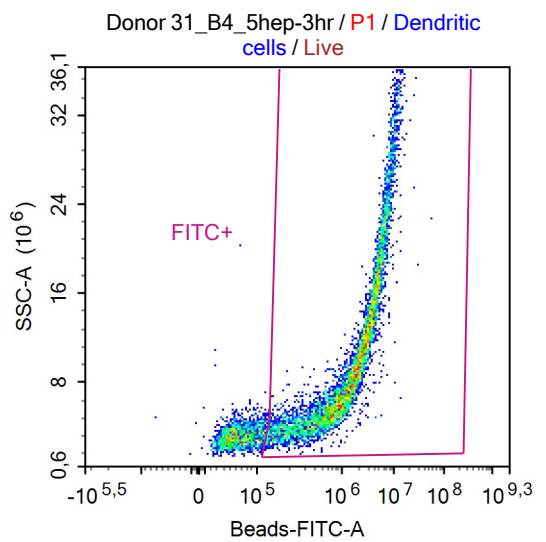

| Gate  | Count | % Live  |
|-------|-------|---------|
| Live  | 8.257 | 100,00% |
| FITC+ | 6.687 | 80,99%  |



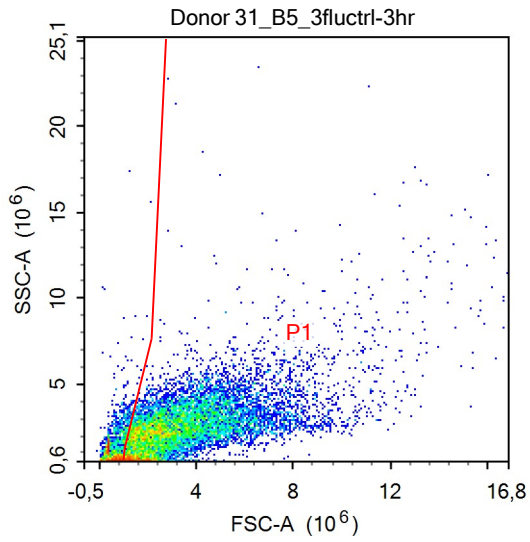

| Gate | Count  | % All   |
|------|--------|---------|
| All  | 40.583 | 100,00% |
| P1   | 18.252 | 44,97%  |

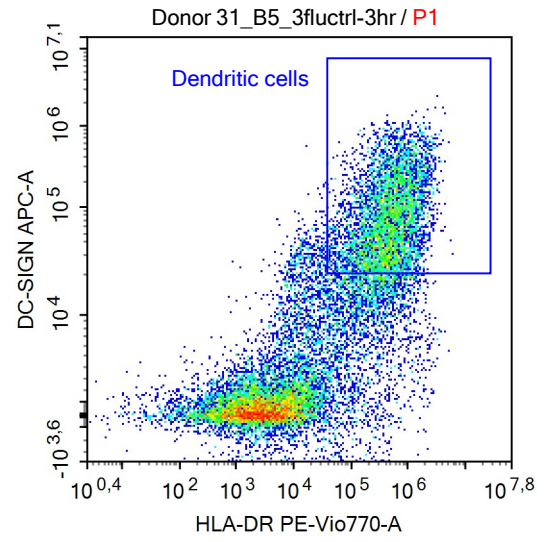

| Gate            | Count  | % P1    |
|-----------------|--------|---------|
| P1              | 18.252 | 100,00% |
| Dendritic cells | 5.268  | 28,86%  |

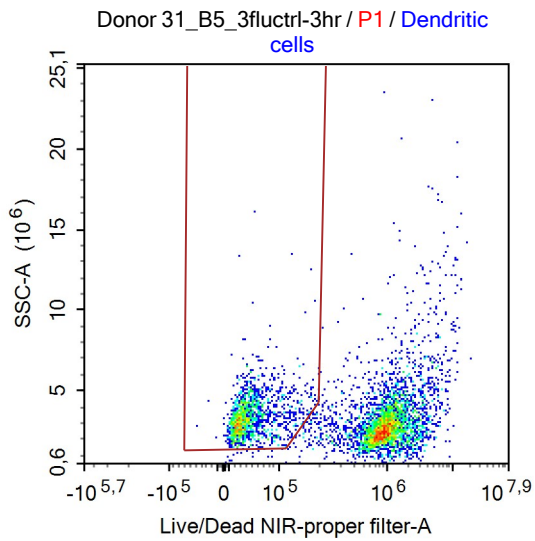

| Gate            | Count | % Dendritic cells |
|-----------------|-------|-------------------|
| Dendritic cells | 5.268 | 100,00%           |
| Live            | 1.582 | 30,03%            |

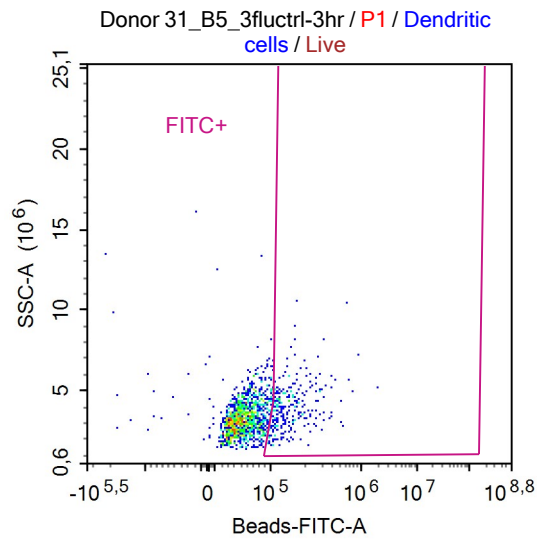

| Gate  | Count | % Live  |
|-------|-------|---------|
| Live  | 1.582 | 100,00% |
| FITC+ | 254   | 16,06%  |

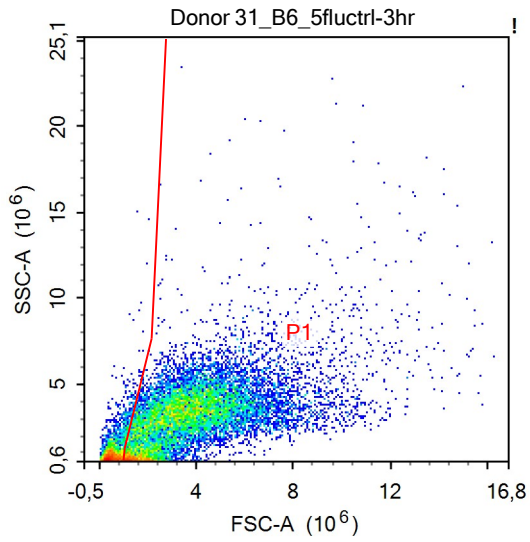

| Gate | Count  | % All   |
|------|--------|---------|
| All  | 56.052 | 100,00% |
| P1   | 21.822 | 38,93%  |

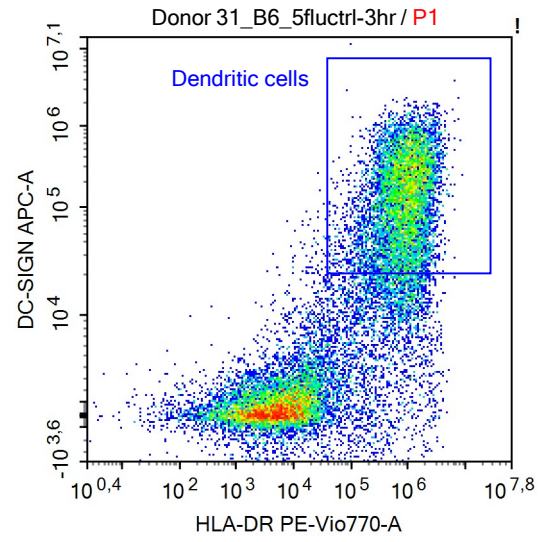

| Gate            | Count  | % P1    |
|-----------------|--------|---------|
| P1              | 21.822 | 100,00% |
| Dendritic cells | 8.150  | 37,35%  |

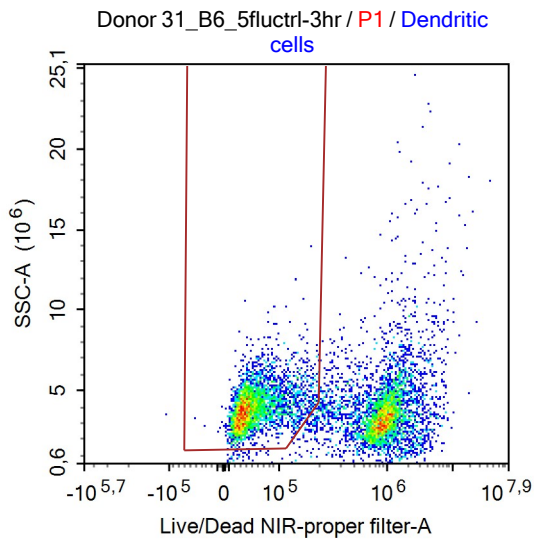

| Gate            | Count | % Dendritic cells |
|-----------------|-------|-------------------|
| Dendritic cells | 8.150 | 100,00%           |
| Live            | 3.708 | 45,50%            |

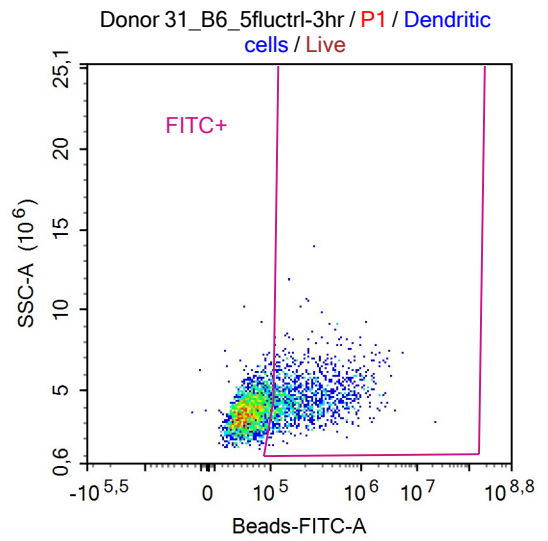

| Gate  | Count | % Live  |
|-------|-------|---------|
| Live  | 3.708 | 100,00% |
| FITC+ | 1.243 | 33,52%  |

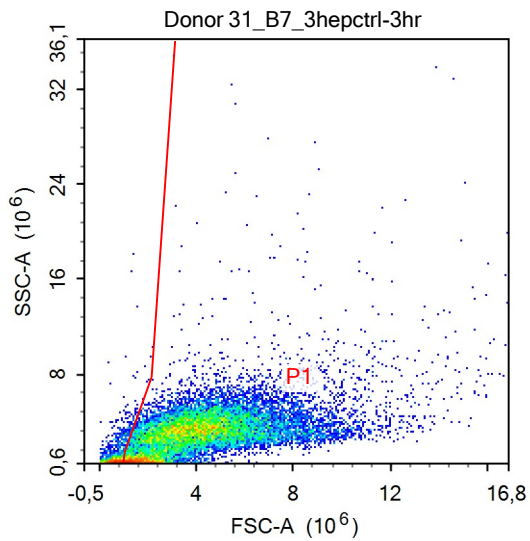

| Gate | Count  | % All   |
|------|--------|---------|
| All  | 63.152 | 100,00% |
| P1   | 28.730 | 45,49%  |

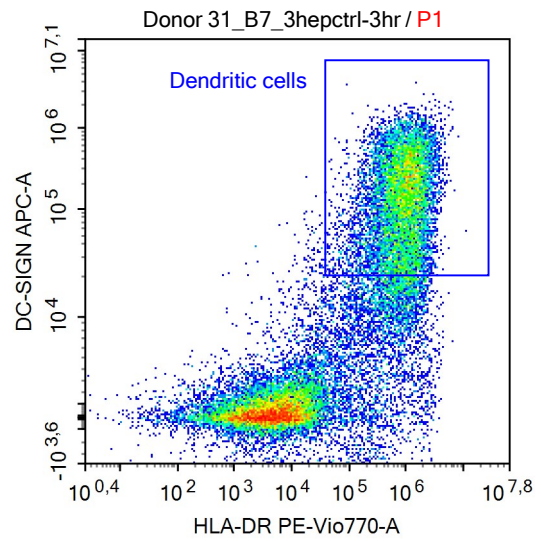

| Gate            | Count  | % P1    |
|-----------------|--------|---------|
| P1              | 28.730 | 100,00% |
| Dendritic cells | 9.664  | 33,64%  |

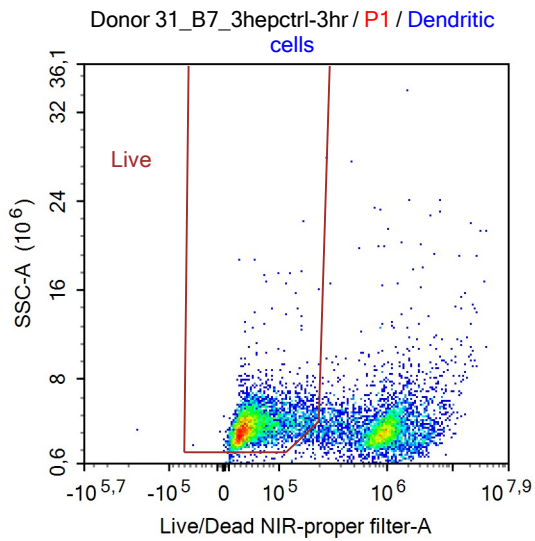

| Gate            | Count | % Dendritic cells |
|-----------------|-------|-------------------|
| Dendritic cells | 9.664 | 100,00%           |
| Live            | 5.304 | 54,88%            |

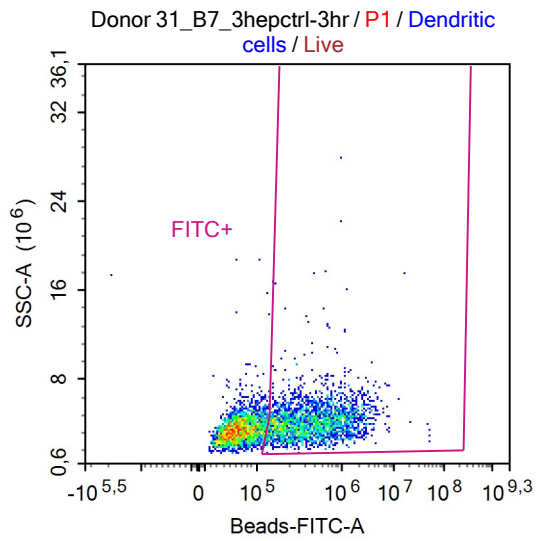

| Gate  | Count | % Live  |
|-------|-------|---------|
| Live  | 5.304 | 100,00% |
| FITC+ | 2.583 | 48,70%  |

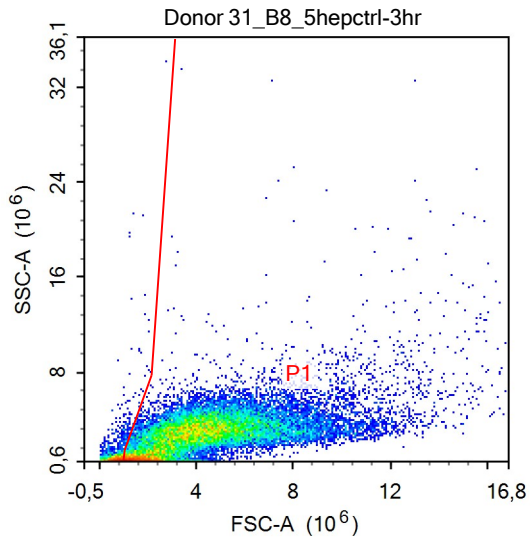

| Gate | Count  | % All   |
|------|--------|---------|
| All  | 89.219 | 100,00% |
| P1   | 47.090 | 52,78%  |

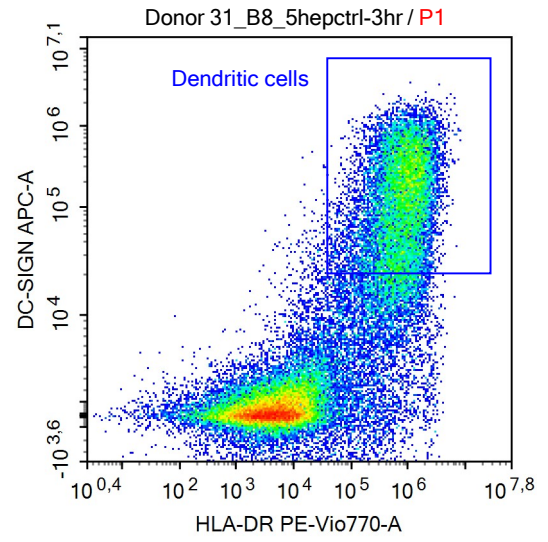

| Gate            | Count  | % P1    |
|-----------------|--------|---------|
| P1              | 47.090 | 100,00% |
| Dendritic cells | 13.406 | 28,47%  |

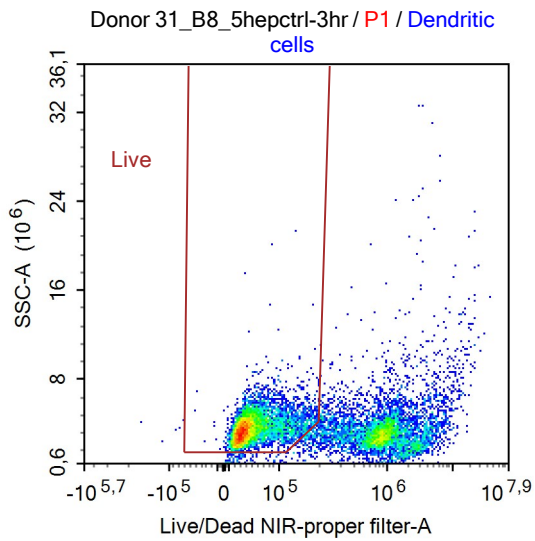

| Gate            | Count  | % Dendritic cells |
|-----------------|--------|-------------------|
| Dendritic cells | 13.406 | 100,00%           |
| Live            | 7.450  | 55,57%            |

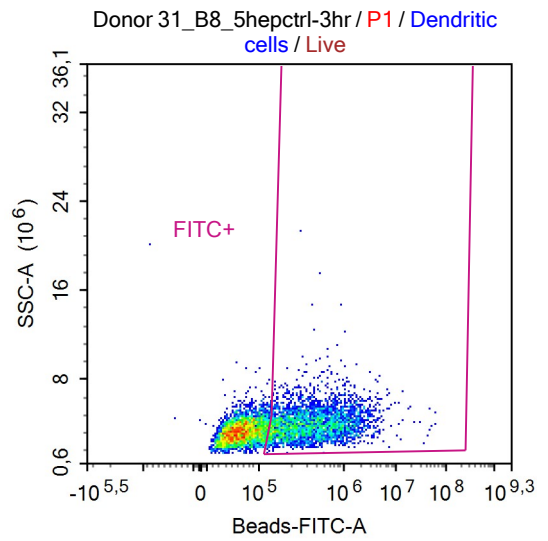

| Gate  | Count | % Live  |
|-------|-------|---------|
| Live  | 7.450 | 100,00% |
| FITC+ | 3.260 | 43,76%  |



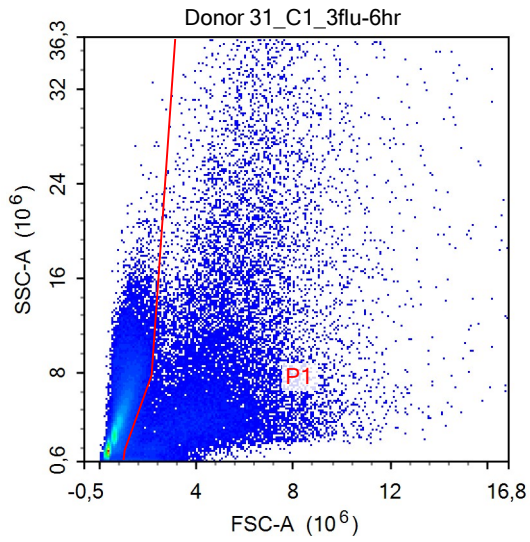

| Gate | Count   | % All   |
|------|---------|---------|
| All  | 396.071 | 100,00% |
| P1   | 32.164  | 8,12%   |

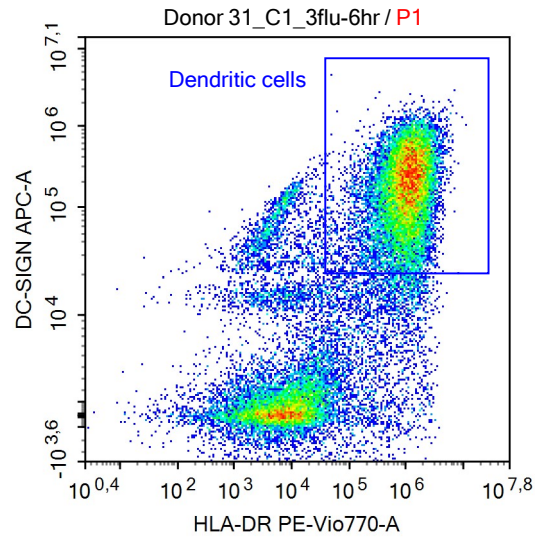

| Gate            | Count  | % P1    |
|-----------------|--------|---------|
| P1              | 32.164 | 100,00% |
| Dendritic cells | 16.006 | 49,76%  |

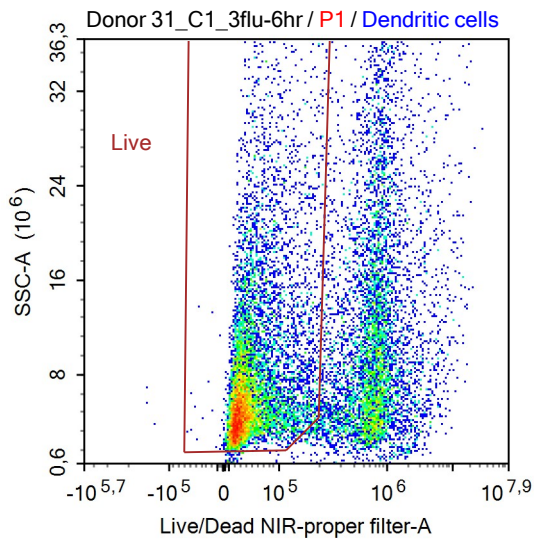

| Gate            | Count  | % Dendritic cells |
|-----------------|--------|-------------------|
| Dendritic cells | 16.006 | 100,00%           |
| Live            | 9.057  | 56,59%            |

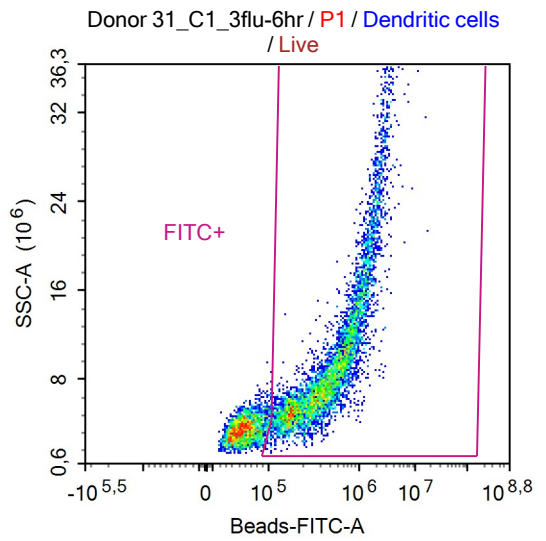

| Gate  | Count | % Live  |
|-------|-------|---------|
| Live  | 9.057 | 100,00% |
| FITC+ | 6.553 | 72,35%  |

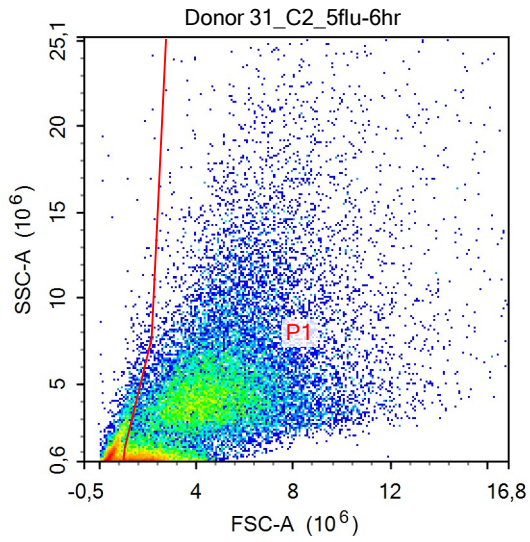

| Gate | Count   | % All   |
|------|---------|---------|
| All  | 101.136 | 100,00% |
| P1   | 47.946  | 47,41%  |

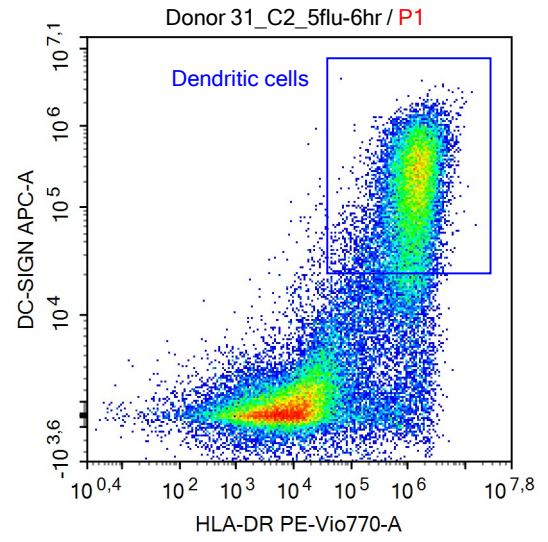

| Gate            | Count  | % P1    |
|-----------------|--------|---------|
| P1              | 47.946 | 100,00% |
| Dendritic cells | 15.823 | 33,00%  |

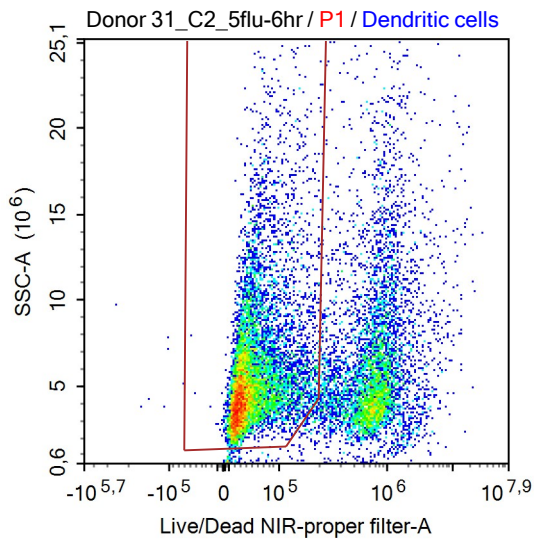

| Gate            | Count  | % Dendritic cells |
|-----------------|--------|-------------------|
| Dendritic cells | 15.823 | 100,00%           |
| Live            | 9.603  | 60,69%            |

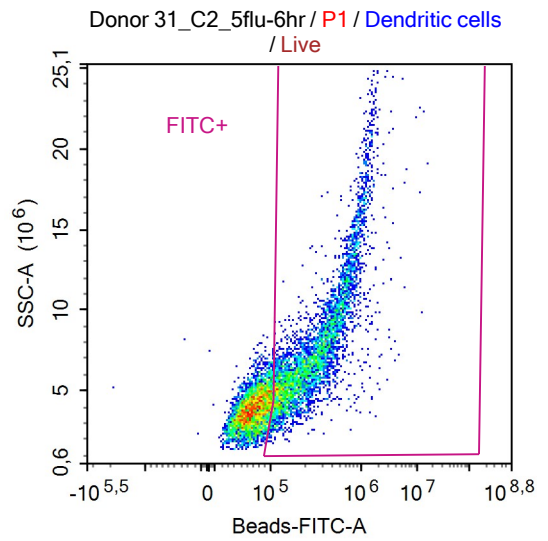

| Gate  | Count | % Live  |
|-------|-------|---------|
| Live  | 9.603 | 100,00% |
| FITC+ | 5.113 | 53,24%  |

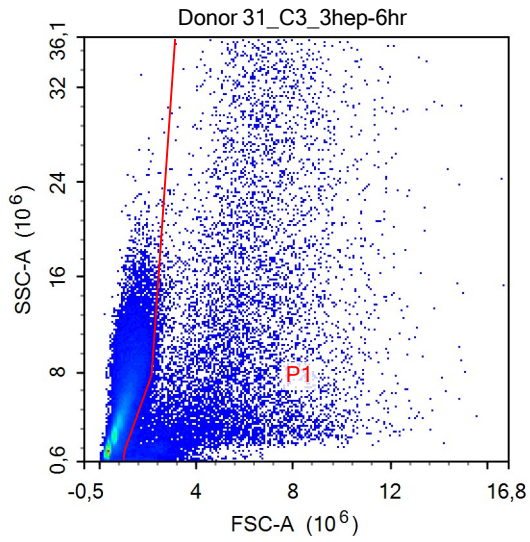

| Gate | Count   | % All   |
|------|---------|---------|
| All  | 332.802 | 100,00% |
| P1   | 22.383  | 6,73%   |

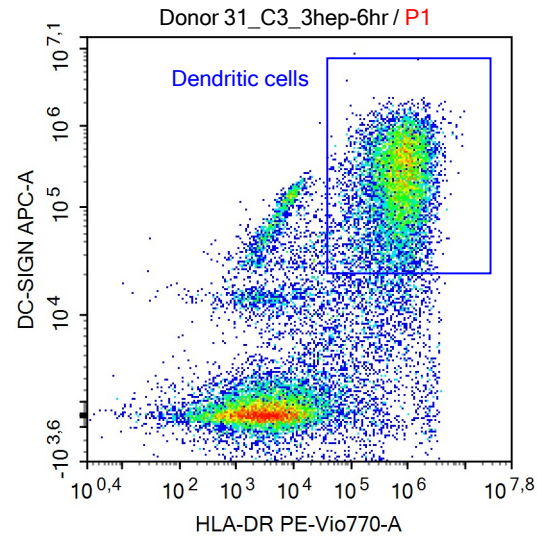

| Gate            | Count  | % P1    |
|-----------------|--------|---------|
| P1              | 22.383 | 100,00% |
| Dendritic cells | 7.925  | 35,41%  |

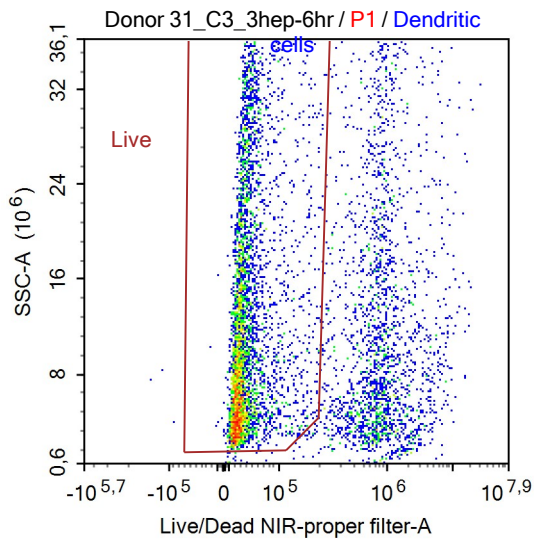

| Gate            | Count | % Dendritic cells |
|-----------------|-------|-------------------|
| Dendritic cells | 7.925 | 100,00%           |
| Live            | 5.300 | 66,88%            |

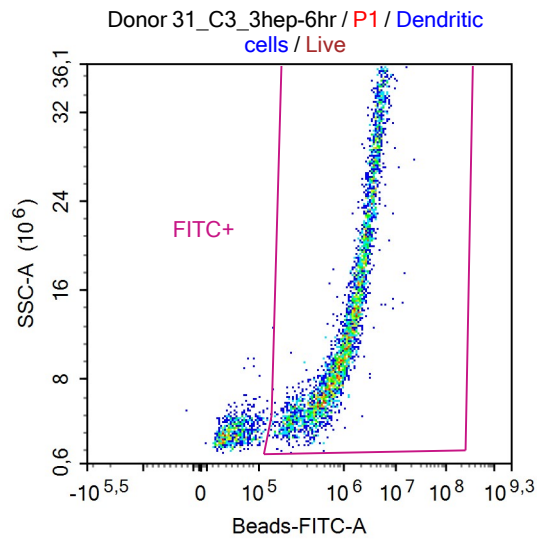

| Gate  | Count | % Live  |
|-------|-------|---------|
| Live  | 5.300 | 100,00% |
| FITC+ | 4.591 | 86,62%  |

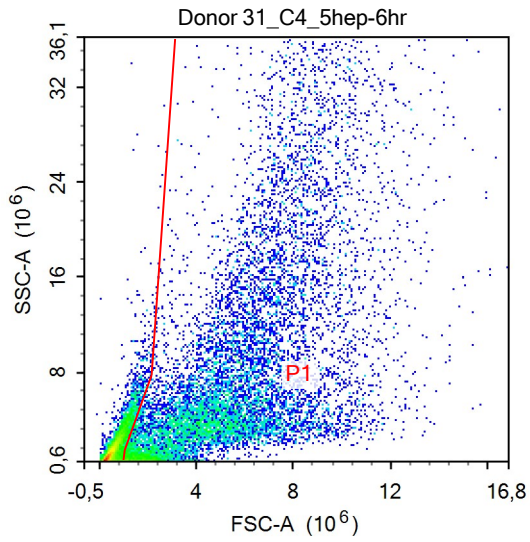

| Gate | Count  | % All   |
|------|--------|---------|
| All  | 69.157 | 100,00% |
| P1   | 21.586 | 31,21%  |

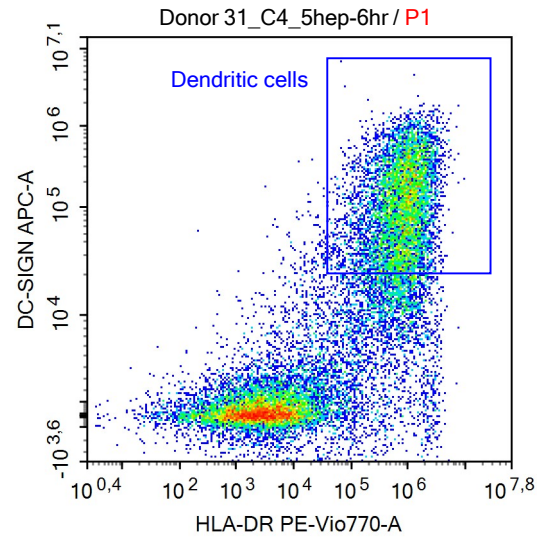

| Gate            | Count  | % P1    |
|-----------------|--------|---------|
| P1              | 21.586 | 100,00% |
| Dendritic cells | 7.317  | 33,90%  |

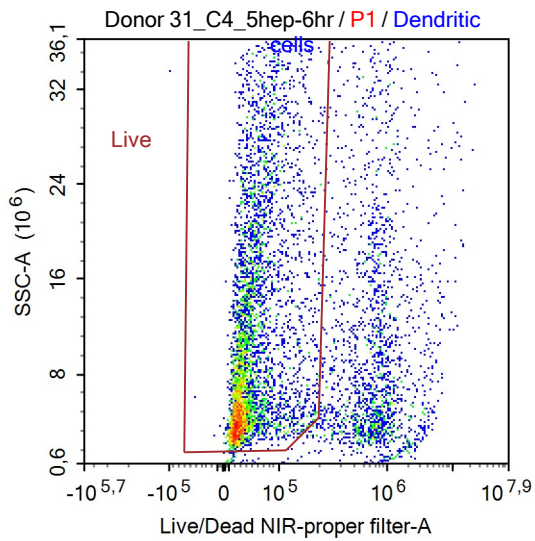

| Gate            | Count | % Dendritic cells |
|-----------------|-------|-------------------|
| Dendritic cells | 7.317 | 100,00%           |
| Live            | 5.234 | 71,53%            |

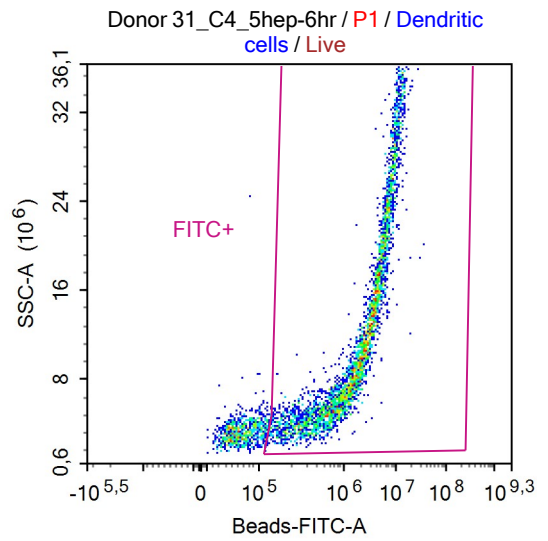

| Gate  | Count | % Live  |
|-------|-------|---------|
| Live  | 5.234 | 100,00% |
| FITC+ | 4.378 | 83,65%  |



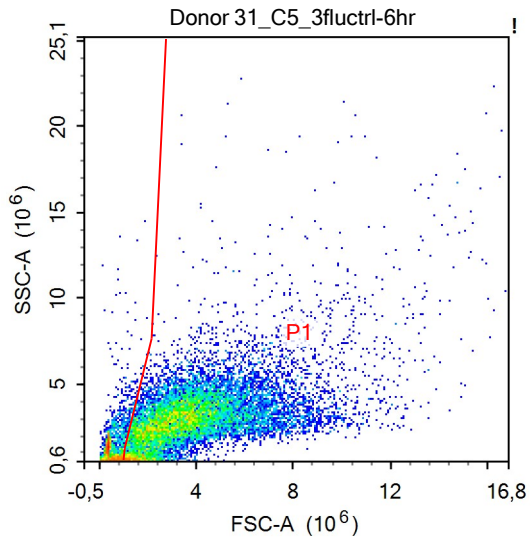

| Gate | Count  | % All   |
|------|--------|---------|
| All  | 46.352 | 100,00% |
| P1   | 20.009 | 43,17%  |

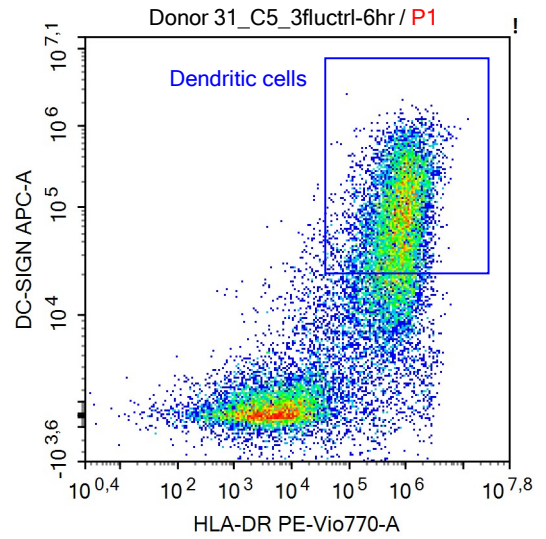

| Gate            | Count  | % P1    |
|-----------------|--------|---------|
| P1              | 20.009 | 100,00% |
| Dendritic cells | 7.930  | 39,63%  |

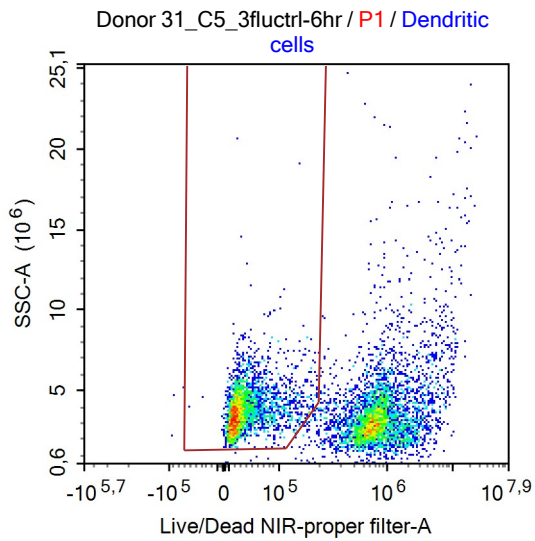

| Gate            | Count | % Dendritic cells |
|-----------------|-------|-------------------|
| Dendritic cells | 7.930 | 100,00%           |
| Live            | 3.508 | 44,24%            |

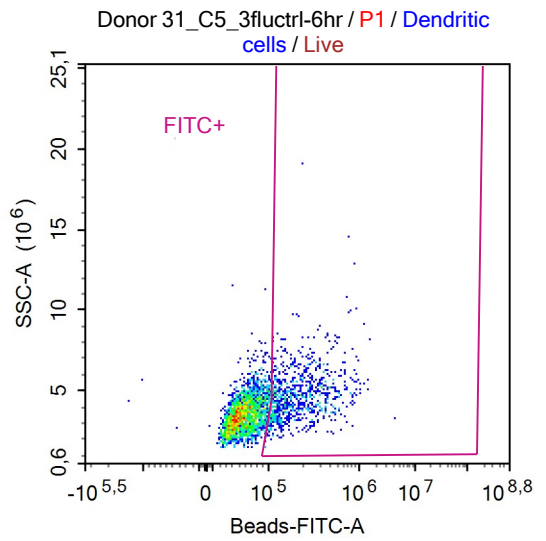

| Gate  | Count | % Live  |
|-------|-------|---------|
| Live  | 3.508 | 100,00% |
| FITC+ | 839   | 23,92%  |

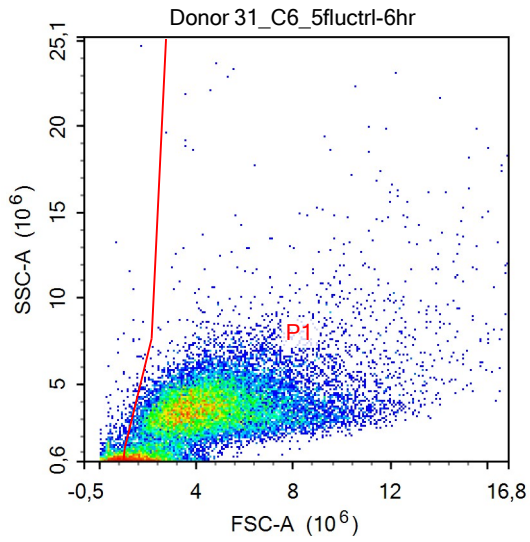

| Gate | Count  | % All   |
|------|--------|---------|
| All  | 71.449 | 100,00% |
| P1   | 33.597 | 47,02%  |

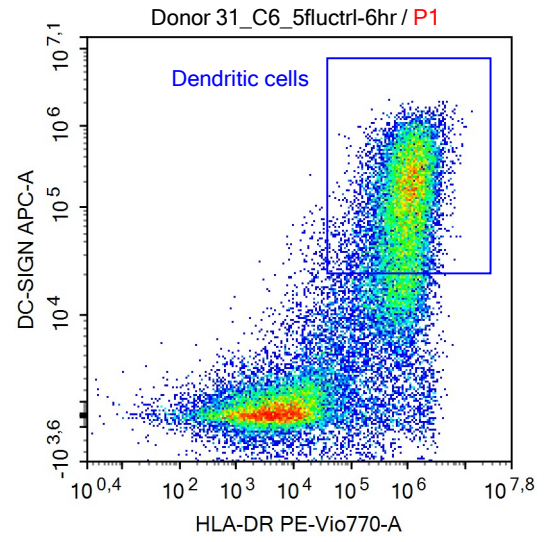

| Gate            | Count  | % P1    |
|-----------------|--------|---------|
| P1              | 33.597 | 100,00% |
| Dendritic cells | 12.416 | 36,96%  |

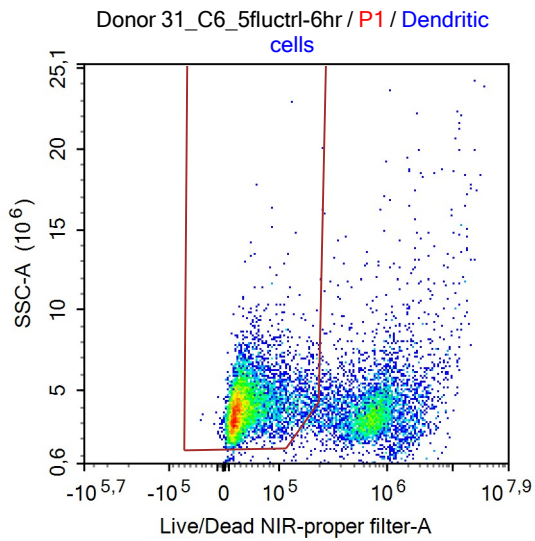

| Gate            | Count  | % Dendritic cells |
|-----------------|--------|-------------------|
| Dendritic cells | 12.416 | 100,00%           |
| Live            | 8.031  | 64,68%            |

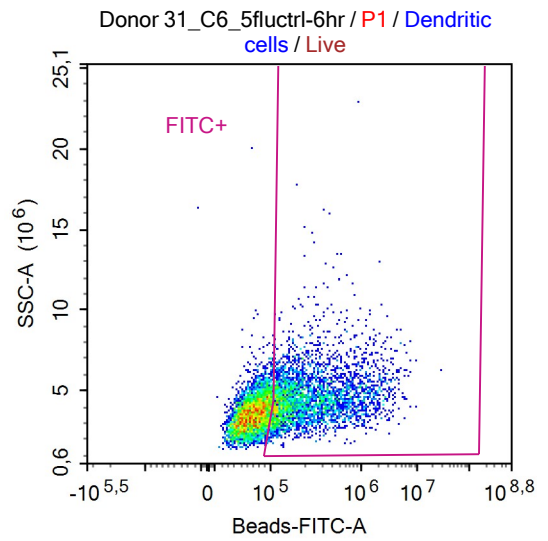

| Gate  | Count | % Live  |
|-------|-------|---------|
| Live  | 8.031 | 100,00% |
| FITC+ | 3.700 | 46,07%  |

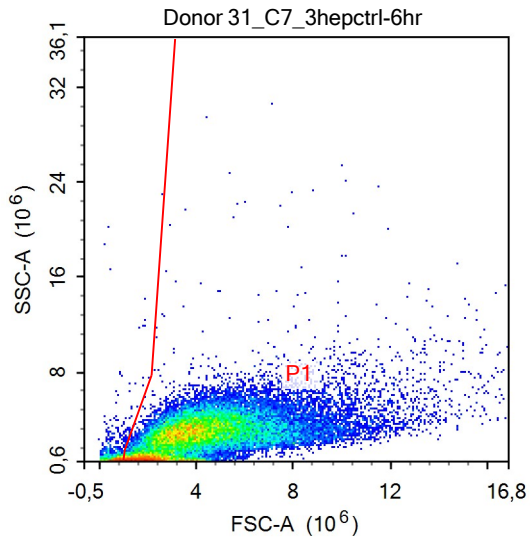

| Gate | Count   | % All   |
|------|---------|---------|
| All  | 108.823 | 100,00% |
| P1   | 57.965  | 53,27%  |

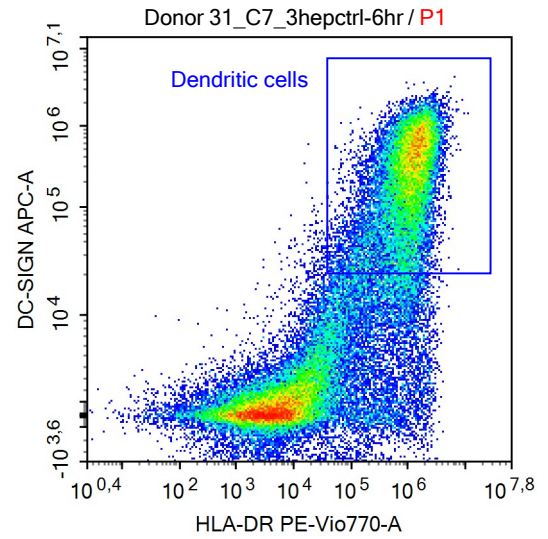

| Gate            | Count  | % P1    |
|-----------------|--------|---------|
| P1              | 57.965 | 100,00% |
| Dendritic cells | 19.504 | 33,65%  |

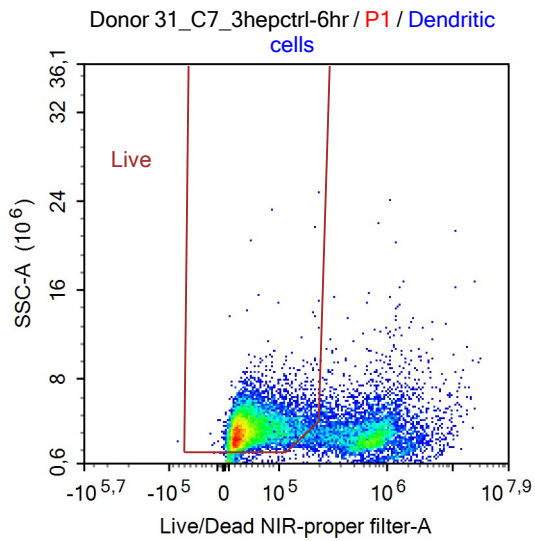

| Gate            | Count  | % Dendritic cells |
|-----------------|--------|-------------------|
| Dendritic cells | 19.504 | 100,00%           |
| Live            | 12.654 | 64,88%            |

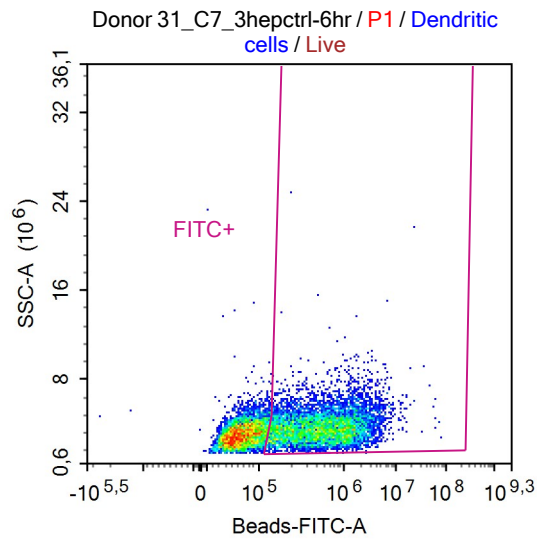

| Gate  | Count  | % Live  |
|-------|--------|---------|
| Live  | 12.654 | 100,00% |
| FITC+ | 7.194  | 56,85%  |

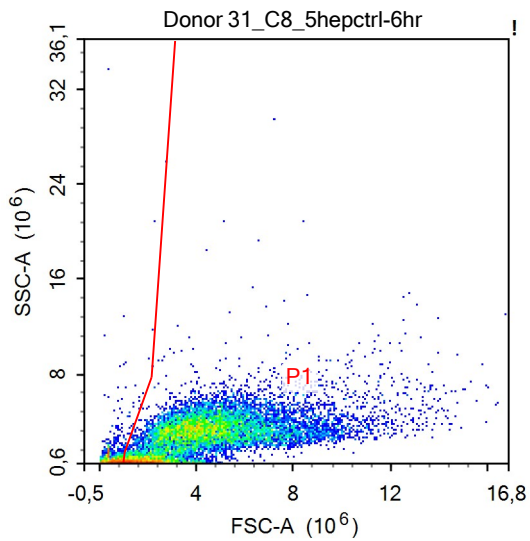

| Gate | Count  | % All   |
|------|--------|---------|
| All  | 61.625 | 100,00% |
| P1   | 27.268 | 44,25%  |

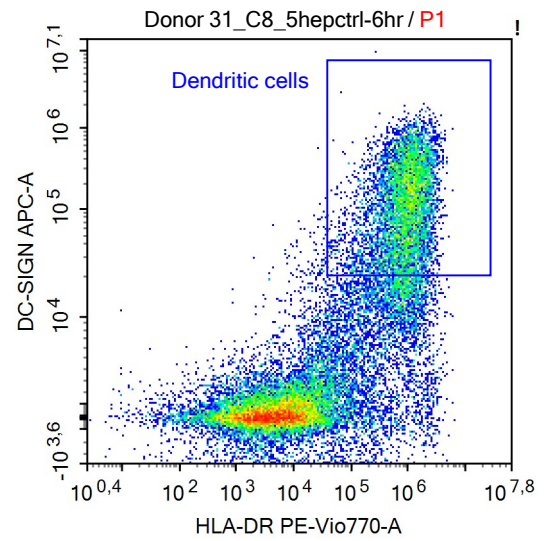

| Gate            | Count  | % P1    |
|-----------------|--------|---------|
| P1              | 27.268 | 100,00% |
| Dendritic cells | 6.674  | 24,48%  |

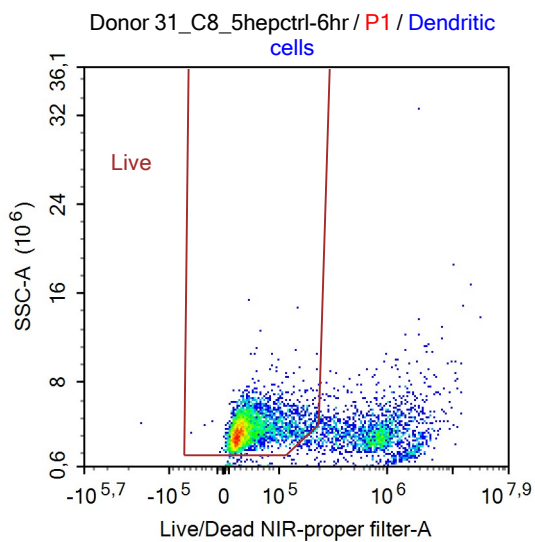

| Gate            | Count | % Dendritic cells |
|-----------------|-------|-------------------|
| Dendritic cells | 6.674 | 100,00%           |
| Live            | 4.620 | 69,22%            |

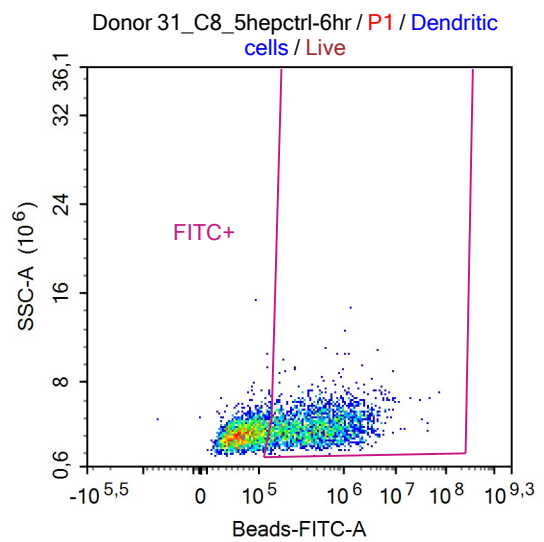

| Gate  | Count | % Live  |
|-------|-------|---------|
| Live  | 4.620 | 100,00% |
| FITC+ | 2.423 | 52,45%  |

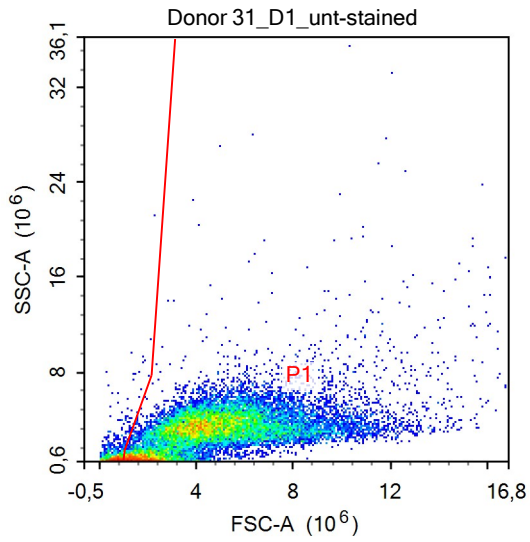

| Gate | Count  | % All   |
|------|--------|---------|
| All  | 61.004 | 100,00% |
| P1   | 31.065 | 50,92%  |

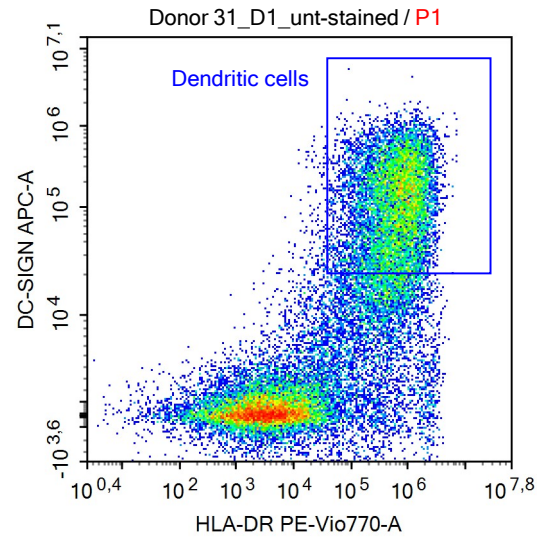

| Gate            | Count  | % P1    |
|-----------------|--------|---------|
| P1              | 31.065 | 100,00% |
| Dendritic cells | 10.290 | 33,12%  |

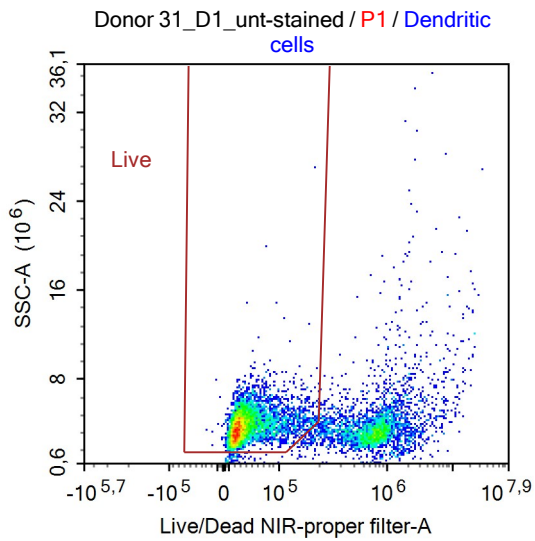

| Gate            | Count  | % Dendritic cells |
|-----------------|--------|-------------------|
| Dendritic cells | 10.290 | 100,00%           |
| Live            | 6.851  | 66,58%            |

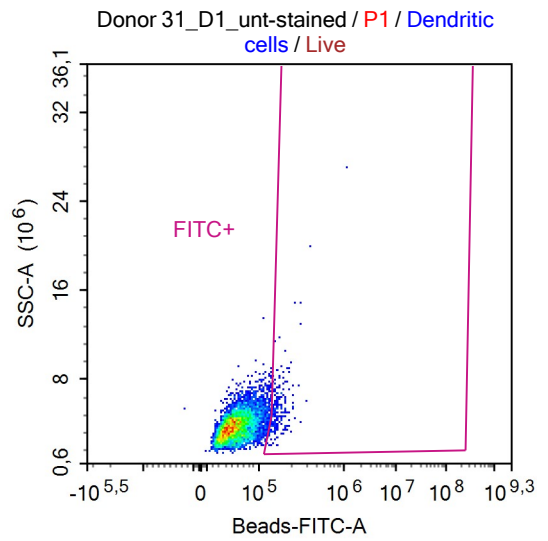

| Gate  | Count | % Live  |
|-------|-------|---------|
| Live  | 6.851 | 100,00% |
| FITC+ | 153   | 2,23%   |



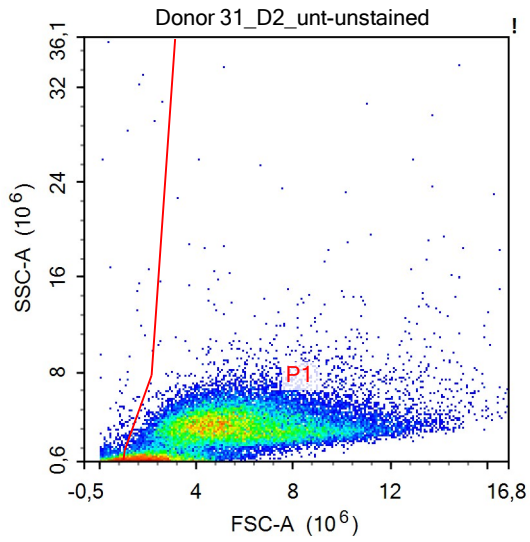

| Gate | Count  | % All   |
|------|--------|---------|
| All  | 91.103 | 100,00% |
| P1   | 55.567 | 60,99%  |

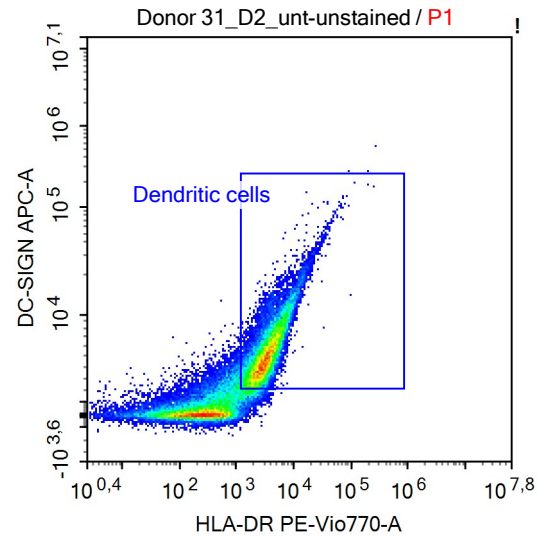

| Gate            | Count  | % P1    |
|-----------------|--------|---------|
| P1              | 55.567 | 100,00% |
| Dendritic cells | 22.313 | 40,16%  |

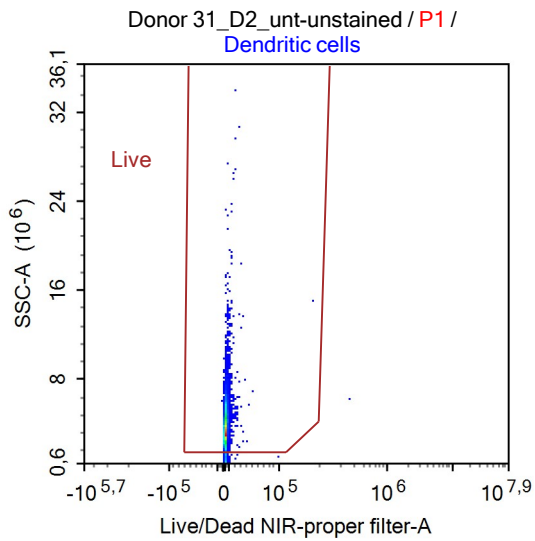

| Gate            | Count  | % Dendritic cells |
|-----------------|--------|-------------------|
| Dendritic cells | 22.313 | 100,00%           |
| Live            | 21.231 | 95,15%            |

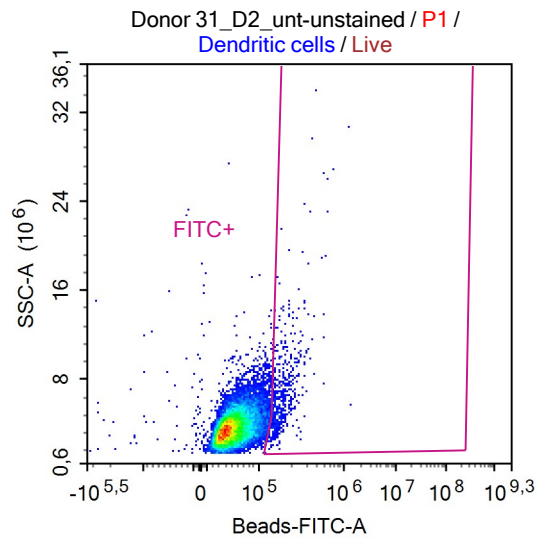

| Gate  | Count  | % Live  |
|-------|--------|---------|
| Live  | 21.231 | 100,00% |
| FITC+ | 458    | 2,16%   |

# Donor 31 FLU

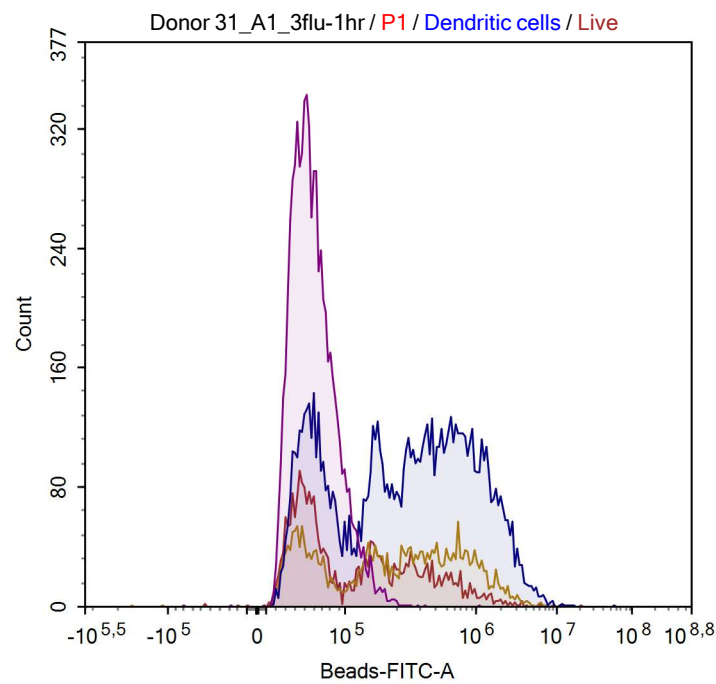

| # | Sample                | Gate  | Count | Mean X  | Median X |
|---|-----------------------|-------|-------|---------|----------|
| 1 | Donor 31_A1_3flu-1hr  | Live  | 2.712 | 217.990 | 88.933   |
| 2 | Donor 31_B1_3flu-3hr  | Live* | 2.944 | 426.077 | 201.176  |
| 3 | Donor 31_C1_3flu-6hr  | Live* | 9.057 | 574.420 | 249.097  |
| 4 | Donor 31_D1_unstained | Live* | 6.851 | 60.662  | 55.959   |

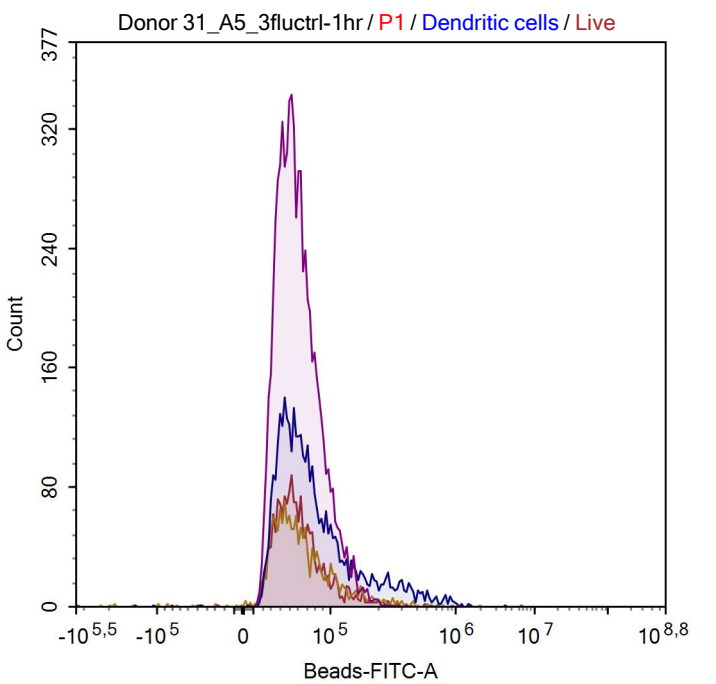

| # | Sample                   | Gate  | Count | Mean X  | Median X |
|---|--------------------------|-------|-------|---------|----------|
| 1 | Donor 31_A5_3fluctrl-1hr | Live  | 1.654 | 69.758  | 56.205   |
| 2 | Donor 31_B5_3fluctrl-3hr | Live* | 1.582 | 70.459  | 57.122   |
| 3 | Donor 31_C5_3fluctrl-6hr | Live* | 3.508 | 102.194 | 66.283   |
| 4 | Donor 31_D1_unstained    | Live* | 6.851 | 60.662  | 55.959   |

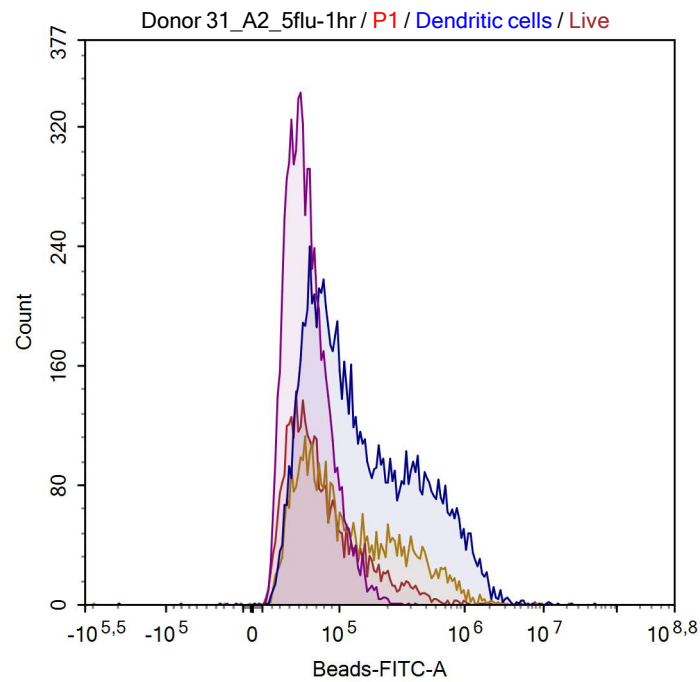

| # | Sample                | Gate  | Count | Mean X  | Median X |
|---|-----------------------|-------|-------|---------|----------|
| 1 | Donor 31_A2_5flu-1hr  | Live  | 3.667 | 110.141 | 66.185   |
| 2 | Donor 31_B2_5flu-3hr  | Live* | 4.055 | 186.698 | 95.298   |
| 3 | Donor 31_C2_5flu-6hr  | Live* | 9.603 | 261.009 | 114.100  |
| 4 | Donor 31_D1_unstained | Live* | 6.851 | 60.662  | 55.959   |

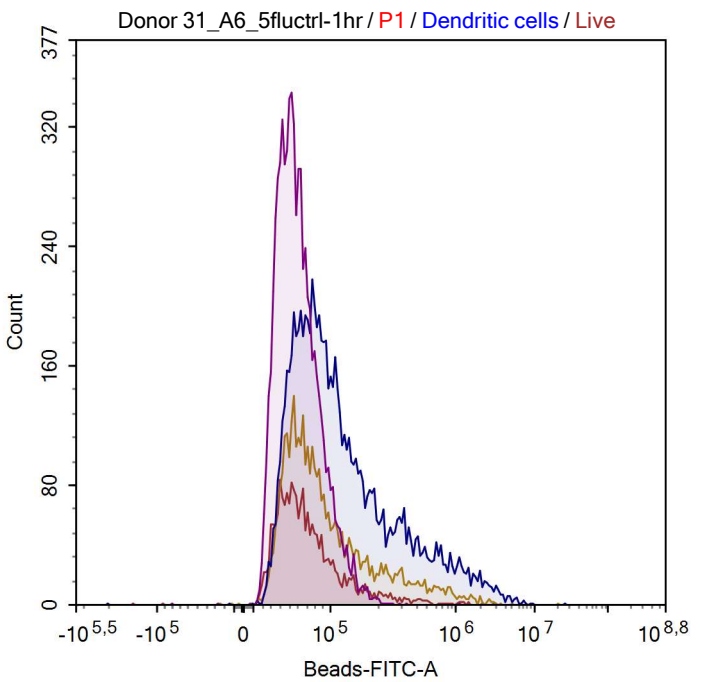

| # | Sample                   | Gate  | Count | Mean X  | Median X |
|---|--------------------------|-------|-------|---------|----------|
| 1 | Donor 31_A6_5fluctrl-1hr | Live  | 2.022 | 89.928  | 63.391   |
| 2 | Donor 31_B6_5fluctrl-3hr | Live* | 3.708 | 158.557 | 78.868   |
| 3 | Donor 31_C6_5fluctrl-6hr | Live* | 8.031 | 247.583 | 98.258   |
| 4 | Donor 31_D1_unstained    | Live* | 6.851 | 60.662  | 55.959   |

Donor 31 HEP

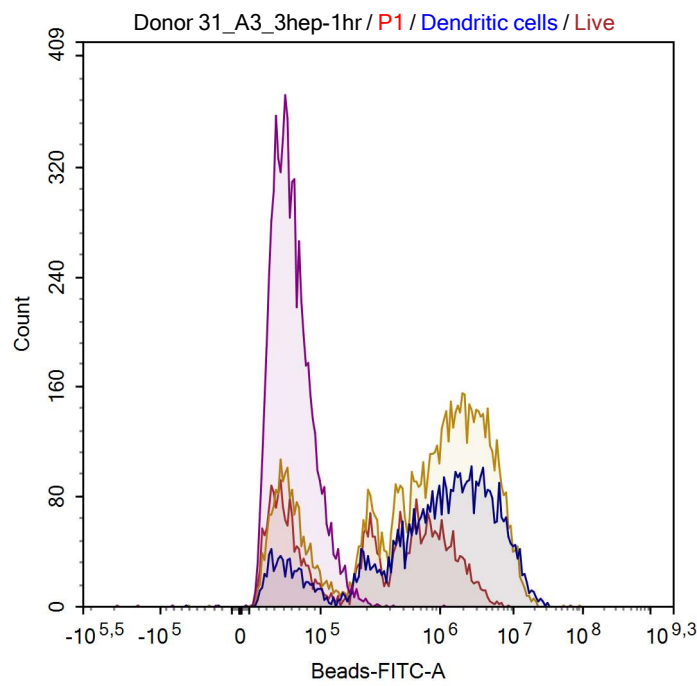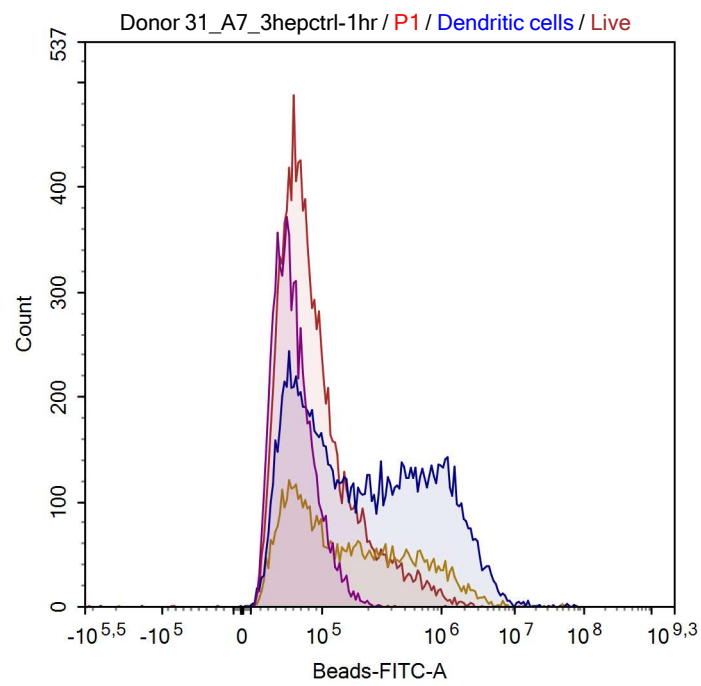

| # | Sample               | Gate  | Count | Mean X    | Median X  |
|---|----------------------|-------|-------|-----------|-----------|
| 1 | Donor 31_A3_3hep-1hr | Live  | 3.874 | 573.890   | 234.908   |
| 2 | Donor 31_B3_3hep-3hr | Live* | 8.640 | 1.917.822 | 871.598   |
| 3 | Donor 31_C3_3hep-6hr | Live* | 5.300 | 2.507.104 | 1.141.961 |
| 4 | Donor 31_D1_un-      | Live* | 6.851 | 60.662    | 55.959    |

| # | Sample                   | Gate  | Count  | Mean X  | Median X |
|---|--------------------------|-------|--------|---------|----------|
| 1 | Donor 31_A7_3hepctrl-1hr | Live  | 11.733 | 135.383 | 75.331   |
| 2 | Donor 31_B7_3hepctrl-3hr | Live* | 5.304  | 388.358 | 124.624  |
| 3 | Donor 31_C7_3hepctrl-6hr | Live* | 12.654 | 607.275 | 168.234  |
| 4 | Donor 31_D1_un-          | Live* | 6.851  | 60.662  | 55.959   |

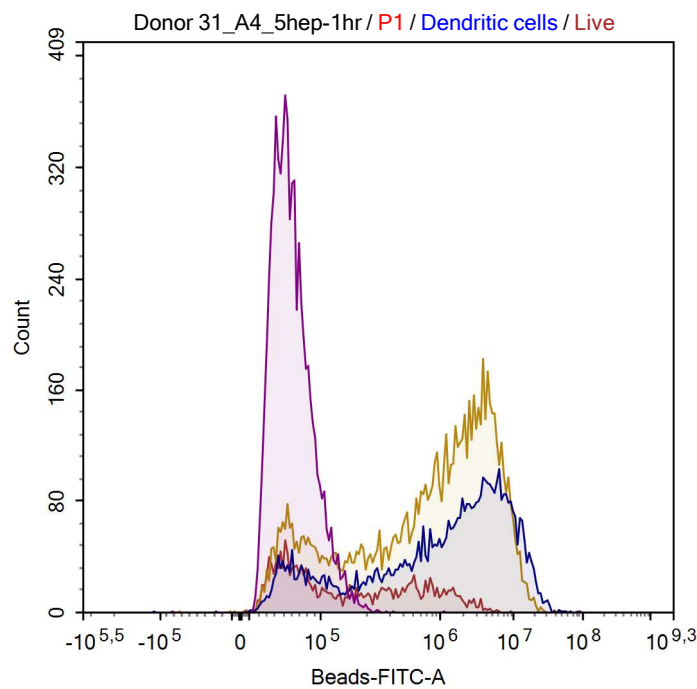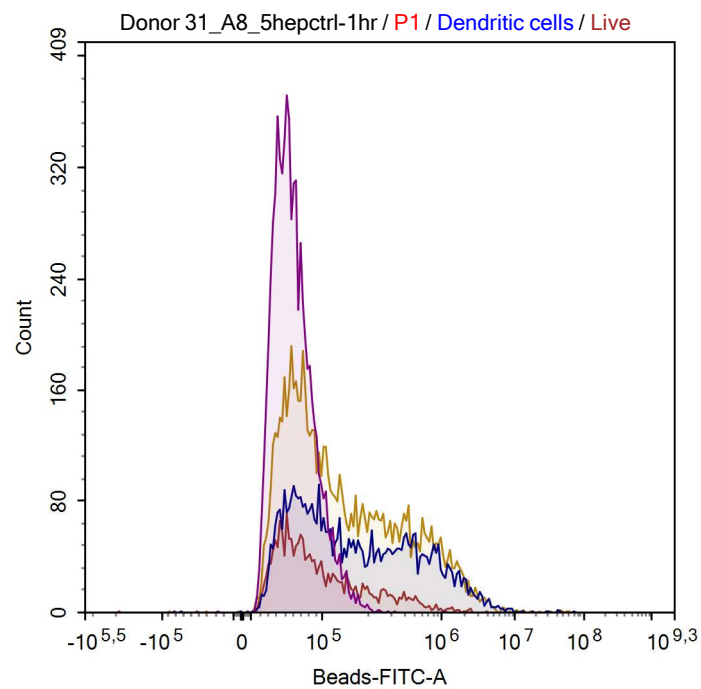

| # | Sample               | Gate  | Count | Mean X    | Median X  |
|---|----------------------|-------|-------|-----------|-----------|
| 1 | Donor 31_A4_5hep-1hr | Live  | 1.757 | 473.857   | 128.404   |
| 2 | Donor 31_B4_5hep-3hr | Live* | 8.257 | 2.319.345 | 1.055.847 |
| 3 | Donor 31_C4_5hep-6hr | Live* | 5.234 | 3.710.281 | 1.614.936 |
| 4 | Donor 31_D1_un-      | Live* | 6.851 | 60.662    | 55.959    |

| # | Sample                   | Gate  | Count | Mean X  | Median X |
|---|--------------------------|-------|-------|---------|----------|
| 1 | Donor 31_A8_5hepctrl-1hr | Live  | 1.903 | 177.205 | 79.521   |
| 2 | Donor 31_B8_5hepctrl-3hr | Live* | 7.450 | 371.409 | 108.475  |
| 3 | Donor 31_C8_5hepctrl-6hr | Live* | 4.620 | 477.545 | 140.718  |
| 4 | Donor 31_D1_un-          | Live* | 6.851 | 60.662  | 55.959   |
