# Supplementary material for: Assessing the Immunomodulatory Effect of Size on the Uptake and Immunogenicity of Influenza- and Hepatitis B Subunit Vaccines In Vitro
Source: MDPI journal article supplement (doi:10.3390/ph15070887), 2022-07-18
Supplement: s1 [file s1]

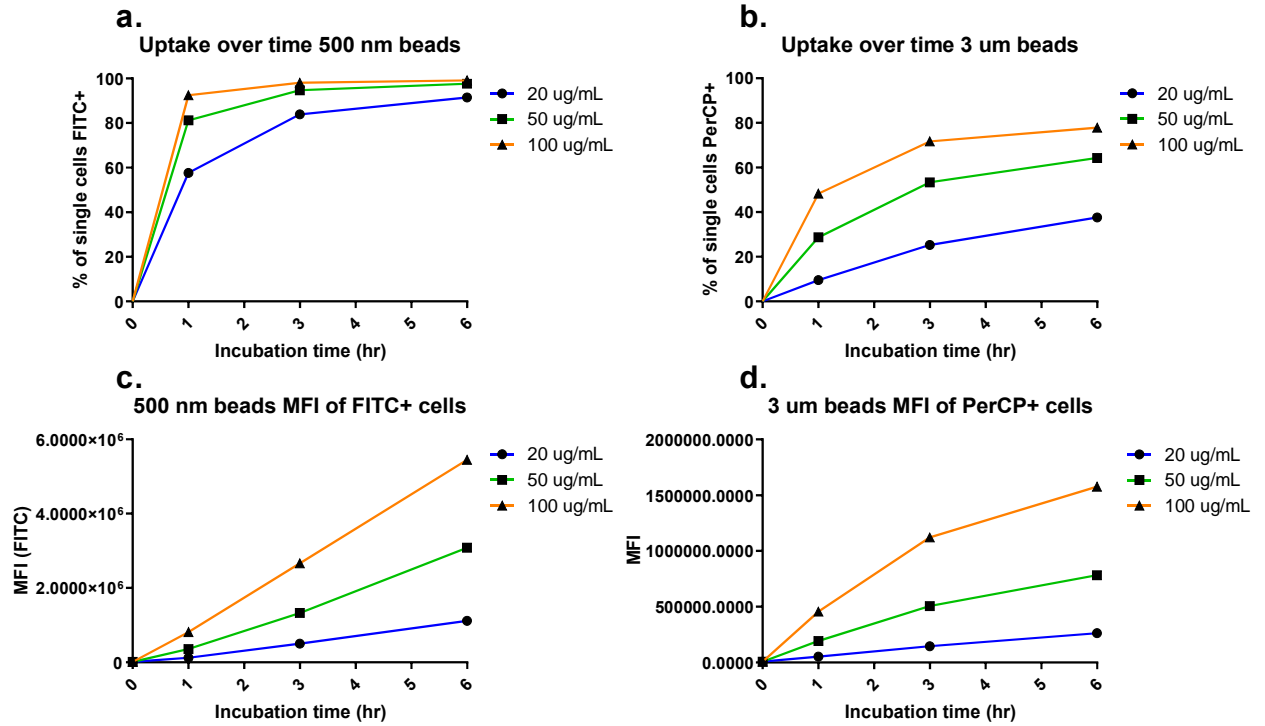

**Supplementary Figure S1:** Uptake of plain particles in THP-1 cells at different concentrations. (a) uptake over time of 500 nm fluorescent particles without antigen shows a clear pattern of uptake in 6 hours. (b) uptake over time of 3  $\mu$ m particles. (c) MFI over time upon stimulation with 500 nm fluorescent particles. (d) MFI over time upon stimulation with 3  $\mu$ m particles. As the FITC-signal for the 3  $\mu$ m particles (b,d) was too high, samples were measured in the PerCP-channel instead of the FITC-channel.

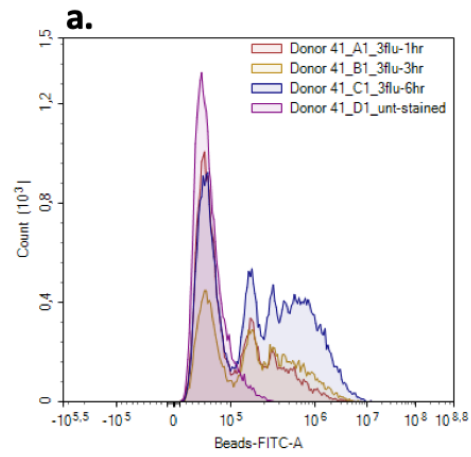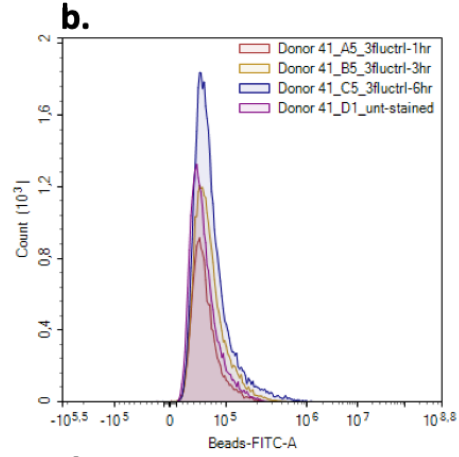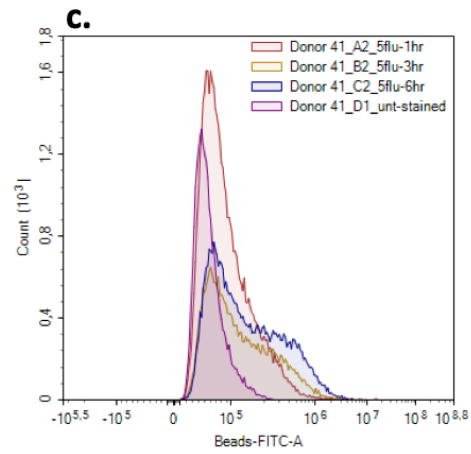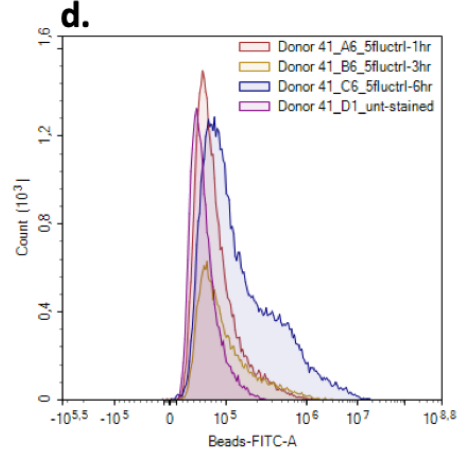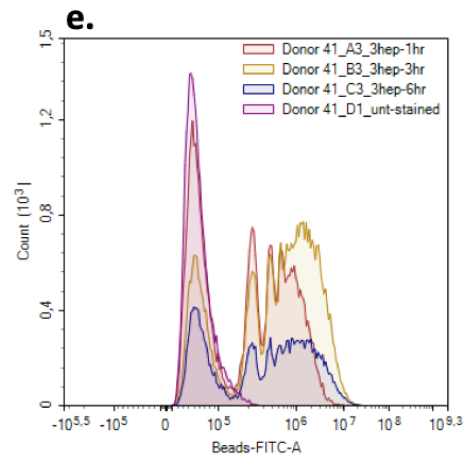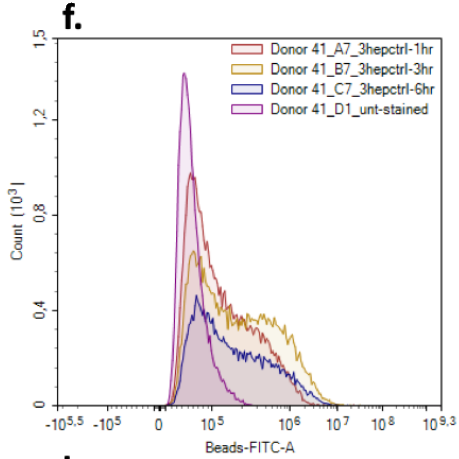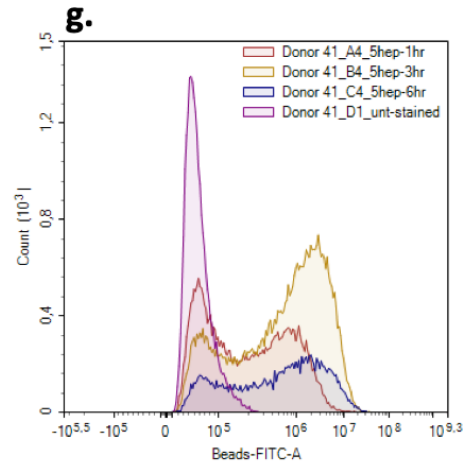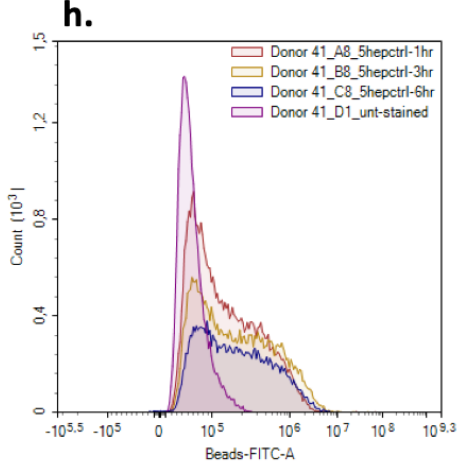

**Supplementary Figure S2:** Fluorescence distributions over time of one representative donor used in the uptake experiments. Different colours show different time-points as depicted in the figure key. The purple graph represents the untreated control condition and resembles the FITC-negative population. **(a)** Cells stimulated with 3  $\mu\text{m}$  influenza subunit vaccine conjugates versus untreated cells. **(b)** Cells stimulated with the amount of unconjugated vaccine similar to the amount bound to the 3  $\mu\text{m}$  influenza subunit vaccine conjugates versus untreated cells. **(c)** Cells stimulated with 500 nm influenza subunit vaccine conjugates versus untreated cells. **(d)** Cells stimulated with the amount of unconjugated vaccine similar to the amount bound to the 500 nm influenza subunit vaccine conjugates versus untreated cells. **(e)** Cells stimulated with 3  $\mu\text{m}$  hepatitis B subunit vaccine conjugates versus untreated cells. **(f)** Cells stimulated with the amount of unconjugated vaccine similar to the amount bound to the 3  $\mu\text{m}$  hepatitis B subunit vaccine conjugates versus untreated cells. **(g)** Cells stimulated with 500 nm hepatitis B subunit vaccine conjugates versus untreated cells. **(h)** Cells stimulated with the amount of unconjugated vaccine similar to the amount bound to the 500 nm hepatitis B subunit vaccine conjugates versus untreated cells.
