# Supplementary material for: Assessing the Immunomodulatory Effect of Size on the Uptake and Immunogenicity of Influenza- and Hepatitis B Subunit Vaccines In Vitro
Source: MDPI journal article supplement (doi:10.3390/ph15070887), 2022-07-18
Supplement: s1 [file s1]

# Report of Donor 48

Specimen Name: Donor 48

Run Time: 11-12-2021 12:22

Cytometer: NovoCytte Quanteon 621200611403

Software: NovoExpress 1.5.6

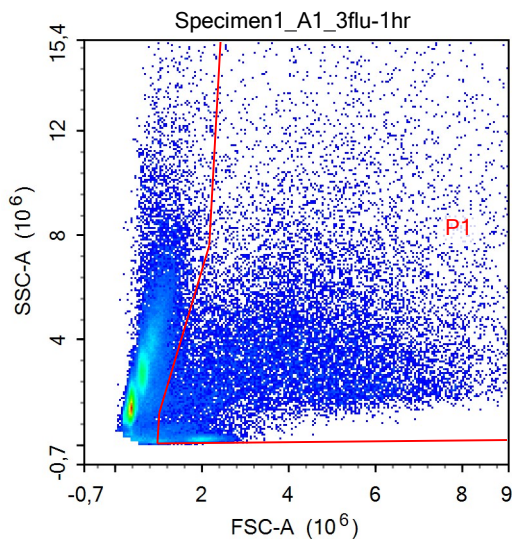

| Gate | Count   | % All   |
|------|---------|---------|
| All  | 208.957 | 100,00% |
| P1   | 23.718  | 11,35%  |

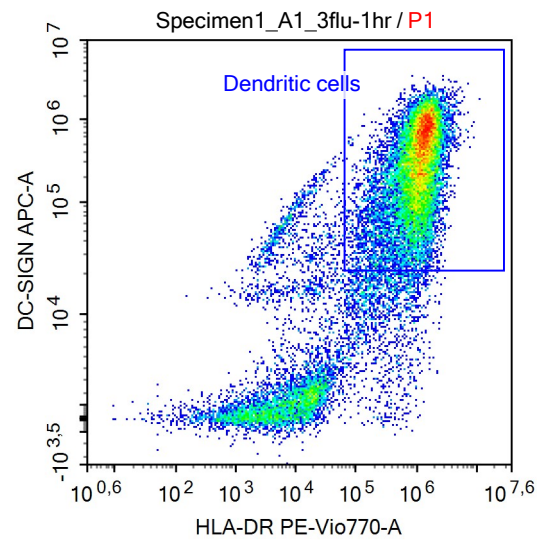

| Gate            | Count  | % P1    |
|-----------------|--------|---------|
| P1              | 23.718 | 100,00% |
| Dendritic cells | 16.396 | 69,13%  |

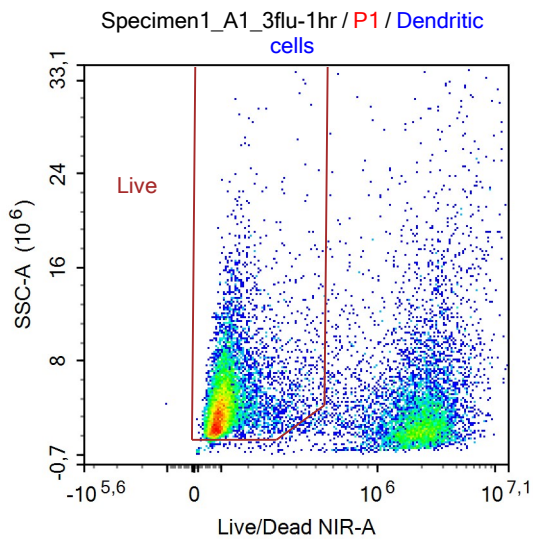

| Gate            | Count  | % Dendritic cells |
|-----------------|--------|-------------------|
| Dendritic cells | 16.396 | 100,00%           |
| Live            | 10.059 | 61,35%            |

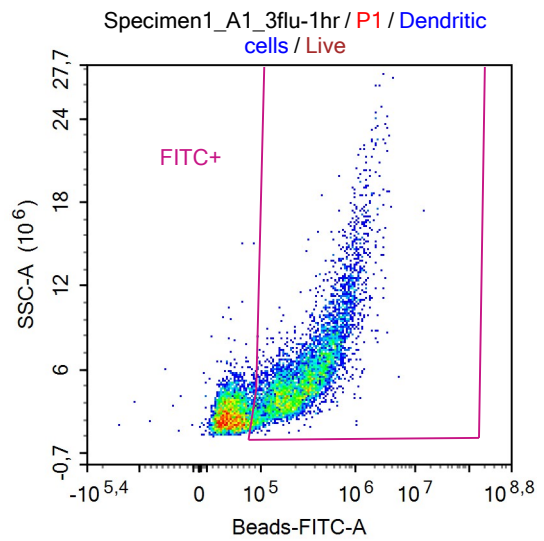

| Gate  | Count  | % Live  |
|-------|--------|---------|
| Live  | 10.059 | 100,00% |
| FITC+ | 6.101  | 60,65%  |

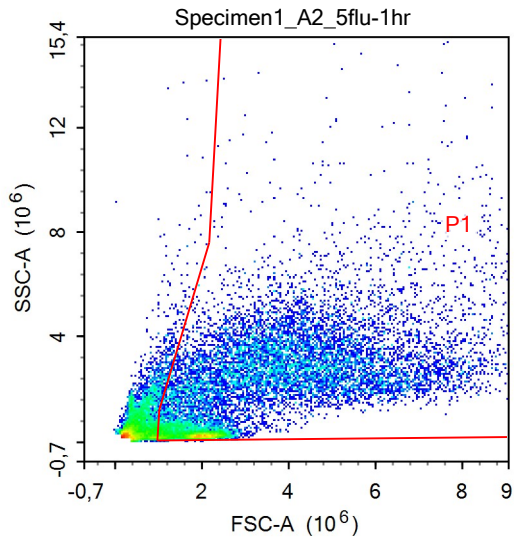

| Gate | Count  | % All   |
|------|--------|---------|
| All  | 27.577 | 100,00% |
| P1   | 15.778 | 57,21%  |

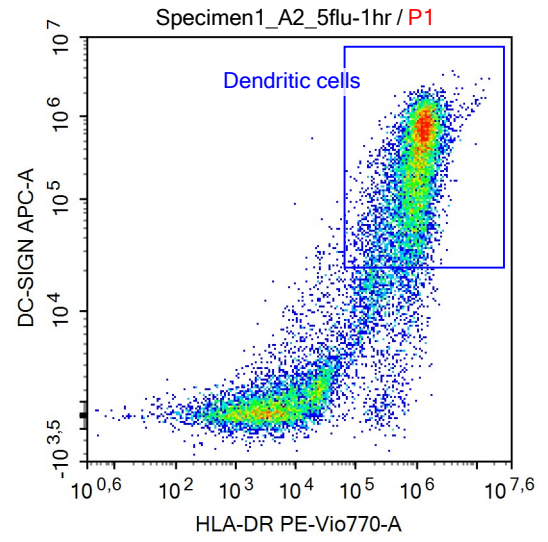

| Gate            | Count  | % P1    |
|-----------------|--------|---------|
| P1              | 15.778 | 100,00% |
| Dendritic cells | 8.420  | 53,37%  |

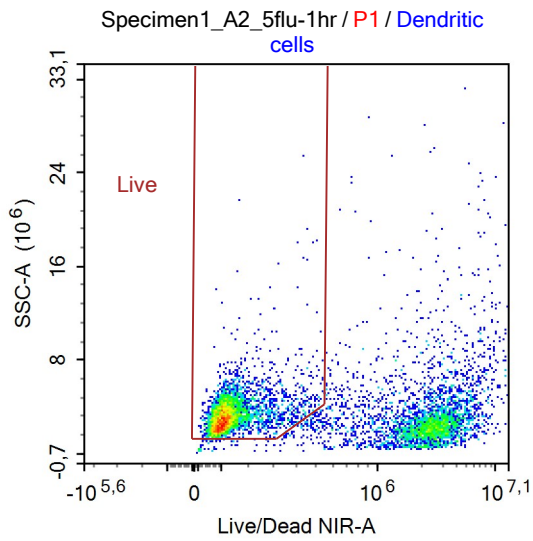

| Gate            | Count | % Dendritic cells |
|-----------------|-------|-------------------|
| Dendritic cells | 8.420 | 100,00%           |
| Live            | 4.809 | 57,11%            |

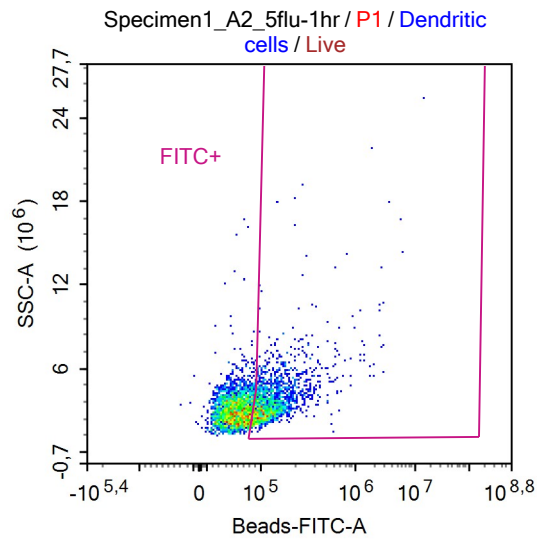

| Gate  | Count | % Live  |
|-------|-------|---------|
| Live  | 4.809 | 100,00% |
| FITC+ | 1.846 | 38,39%  |

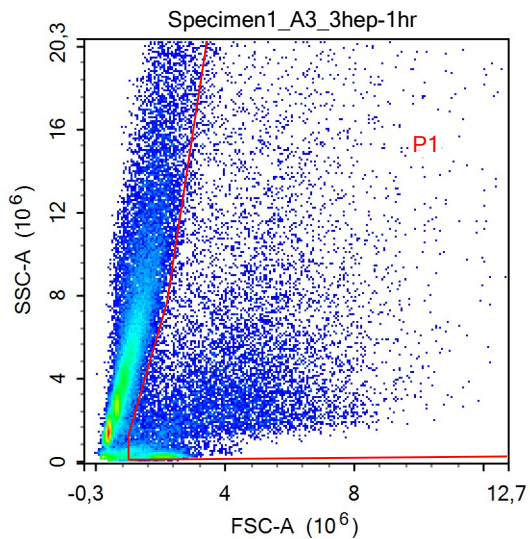

| Gate | Count   | % All   |
|------|---------|---------|
| All  | 104.934 | 100,00% |
| P1   | 18.811  | 17,93%  |

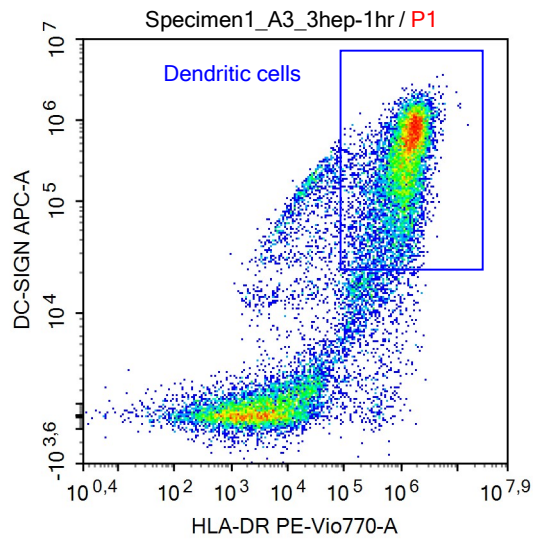

| Gate            | Count  | % P1    |
|-----------------|--------|---------|
| P1              | 18.811 | 100,00% |
| Dendritic cells | 9.035  | 48,03%  |

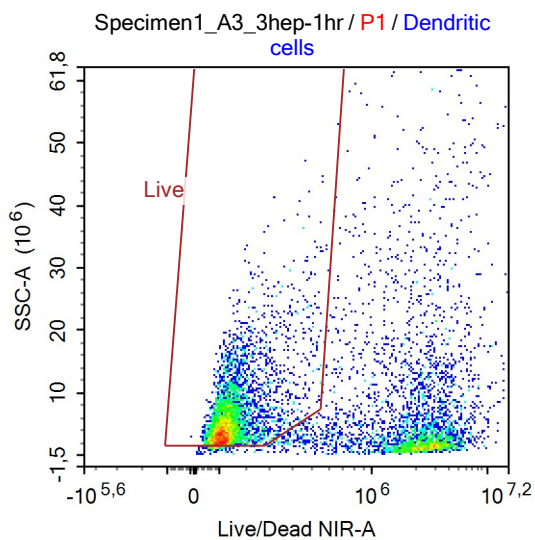

| Gate            | Count | % Dendritic cells |
|-----------------|-------|-------------------|
| Dendritic cells | 9.035 | 100,00%           |
| Live            | 5.294 | 58,59%            |

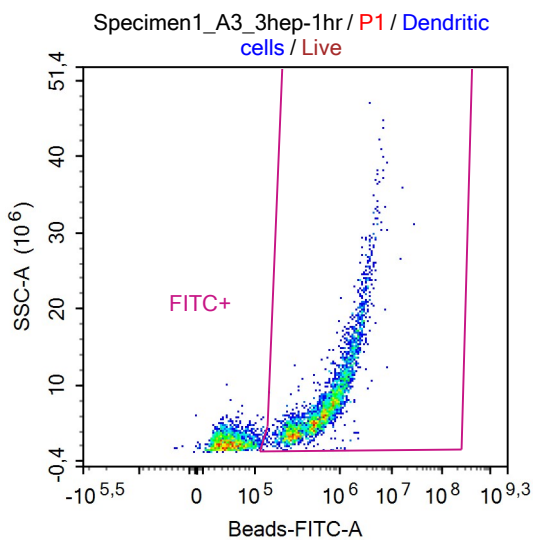

| Gate  | Count | % Live  |
|-------|-------|---------|
| Live  | 5.294 | 100,00% |
| FITC+ | 3.537 | 66,81%  |

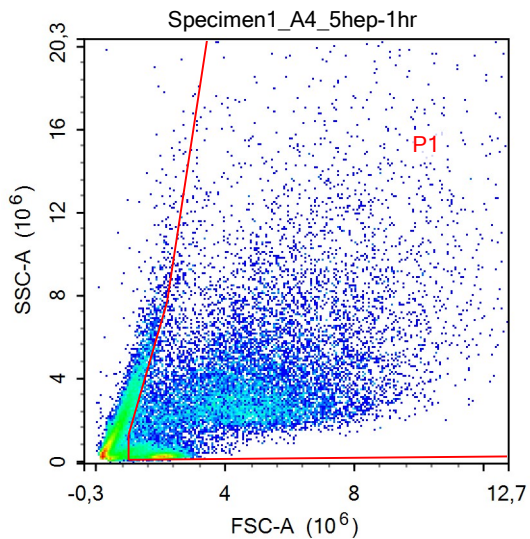

| Gate | Count  | % All   |
|------|--------|---------|
| All  | 42.683 | 100,00% |
| P1   | 20.348 | 47,67%  |

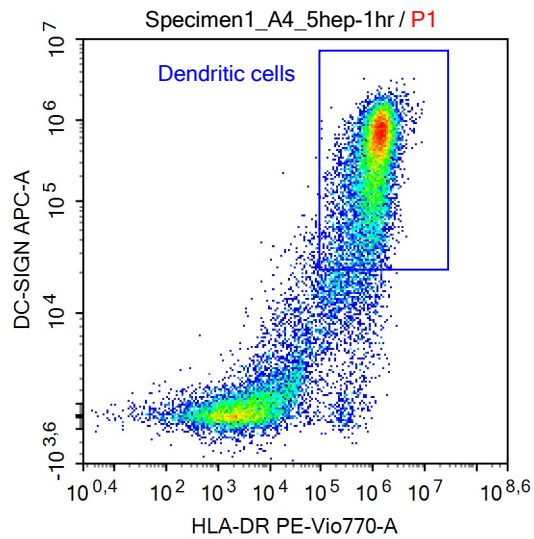

| Gate            | Count  | % P1    |
|-----------------|--------|---------|
| P1              | 20.348 | 100,00% |
| Dendritic cells | 11.331 | 55,69%  |

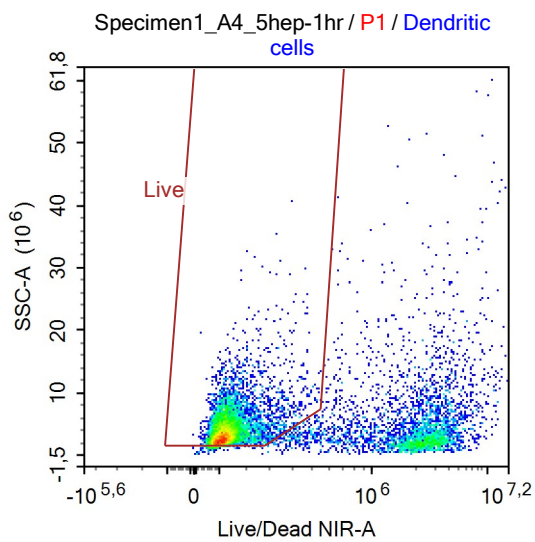

| Gate            | Count  | % Dendritic cells |
|-----------------|--------|-------------------|
| Dendritic cells | 11.331 | 100,00%           |
| Live            | 7.802  | 68,86%            |

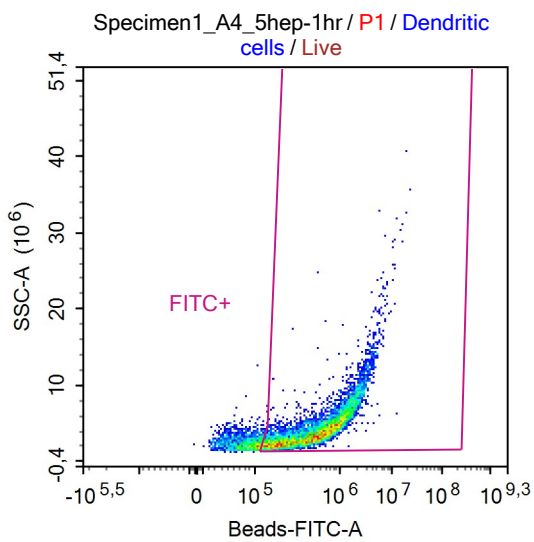

| Gate  | Count | % Live  |
|-------|-------|---------|
| Live  | 7.802 | 100,00% |
| FITC+ | 6.211 | 79,61%  |



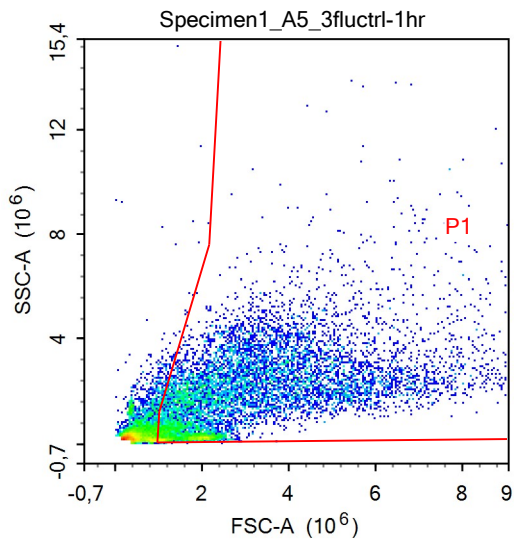

| Gate | Count  | % All   |
|------|--------|---------|
| All  | 16.558 | 100,00% |
| P1   | 9.244  | 55,83%  |

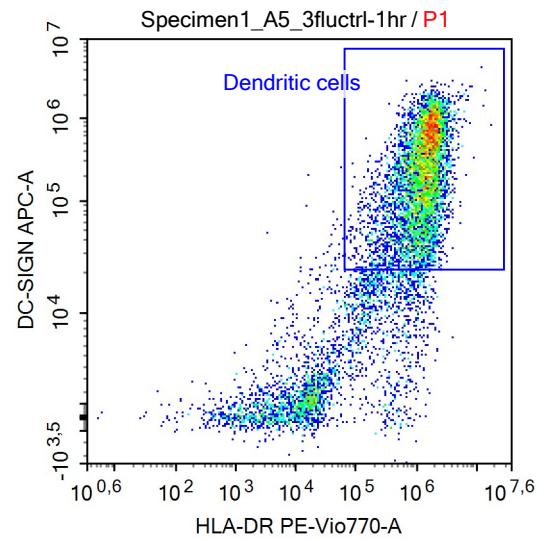

| Gate            | Count | % P1    |
|-----------------|-------|---------|
| P1              | 9.244 | 100,00% |
| Dendritic cells | 6.242 | 67,52%  |

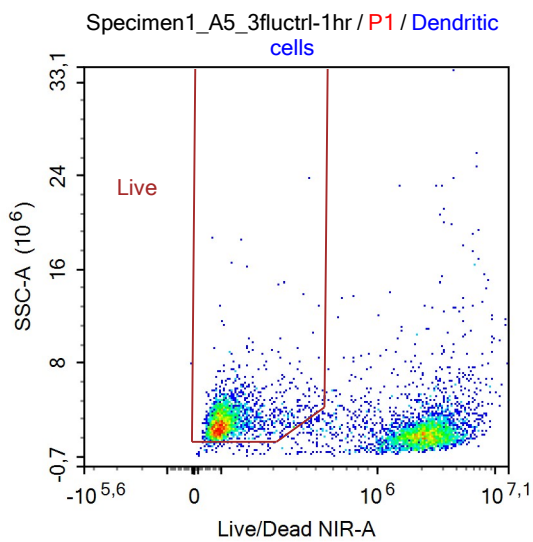

| Gate            | Count | % Dendritic cells |
|-----------------|-------|-------------------|
| Dendritic cells | 6.242 | 100,00%           |
| Live            | 2.855 | 45,74%            |

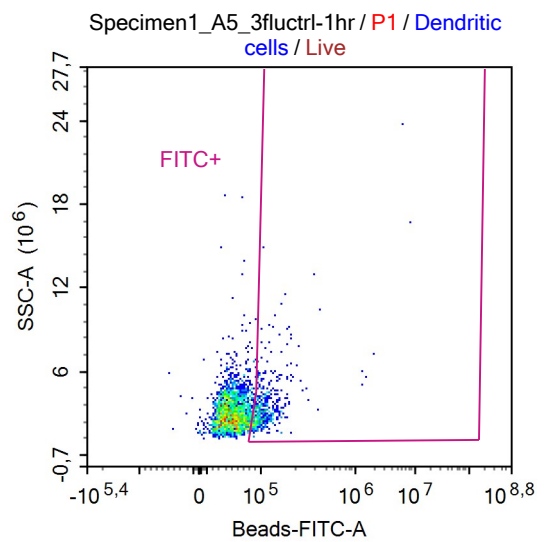

| Gate  | Count | % Live  |
|-------|-------|---------|
| Live  | 2.855 | 100,00% |
| FITC+ | 474   | 16,60%  |

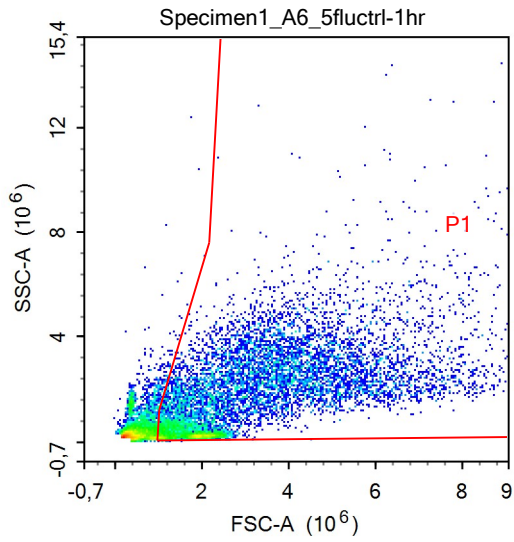

| Gate | Count  | % All   |
|------|--------|---------|
| All  | 19.099 | 100,00% |
| P1   | 10.374 | 54,32%  |

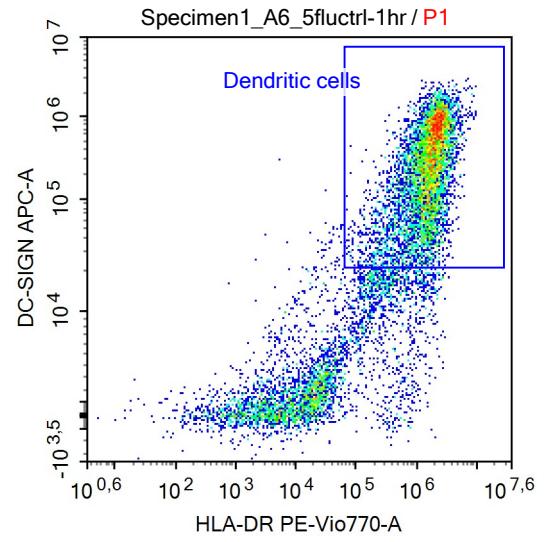

| Gate            | Count  | % P1    |
|-----------------|--------|---------|
| P1              | 10.374 | 100,00% |
| Dendritic cells | 6.325  | 60,97%  |

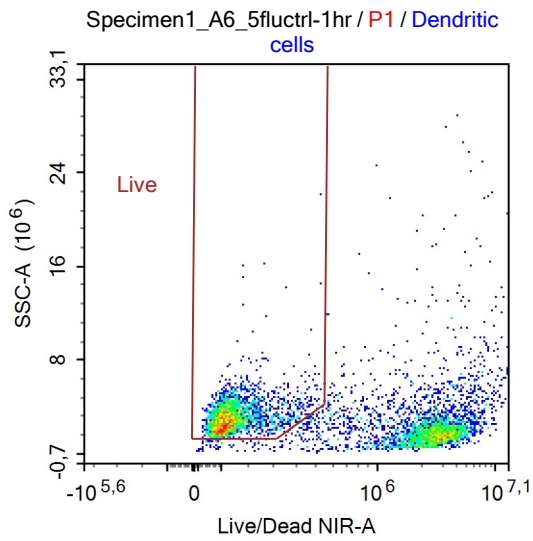

| Gate            | Count | % Dendritic cells |
|-----------------|-------|-------------------|
| Dendritic cells | 6.325 | 100,00%           |
| Live            | 3.129 | 49,47%            |

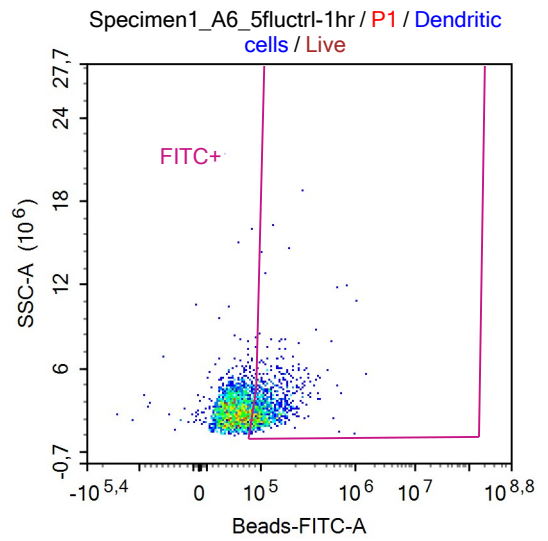

| Gate  | Count | % Live  |
|-------|-------|---------|
| Live  | 3.129 | 100,00% |
| FITC+ | 938   | 29,98%  |

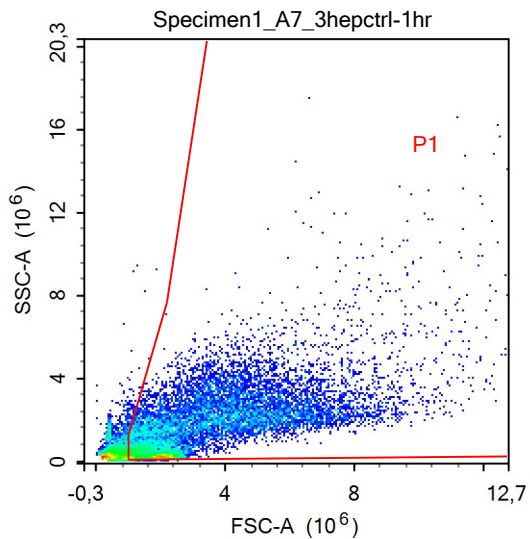

| Gate | Count  | % All   |
|------|--------|---------|
| All  | 28.668 | 100,00% |
| P1   | 17.344 | 60,50%  |

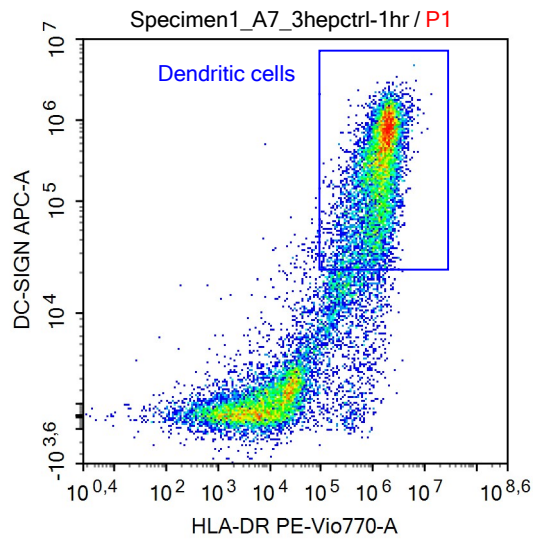

| Gate            | Count  | % P1    |
|-----------------|--------|---------|
| P1              | 17.344 | 100,00% |
| Dendritic cells | 8.240  | 47,51%  |

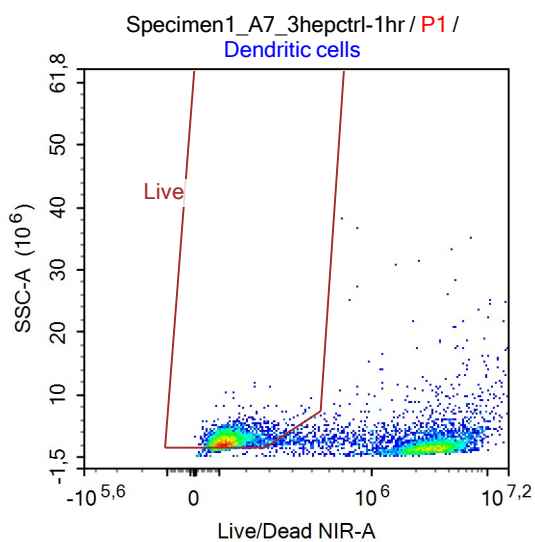

| Gate            | Count | % Dendritic cells |
|-----------------|-------|-------------------|
| Dendritic cells | 8.240 | 100,00%           |
| Live            | 3.975 | 48,24%            |

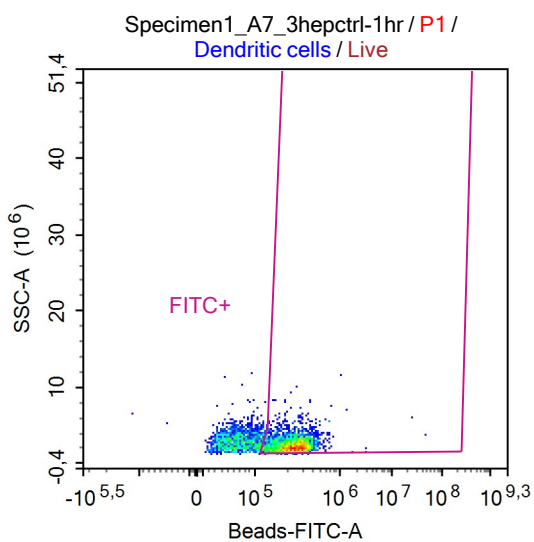

| Gate  | Count | % Live  |
|-------|-------|---------|
| Live  | 3.975 | 100,00% |
| FITC+ | 2.546 | 64,05%  |

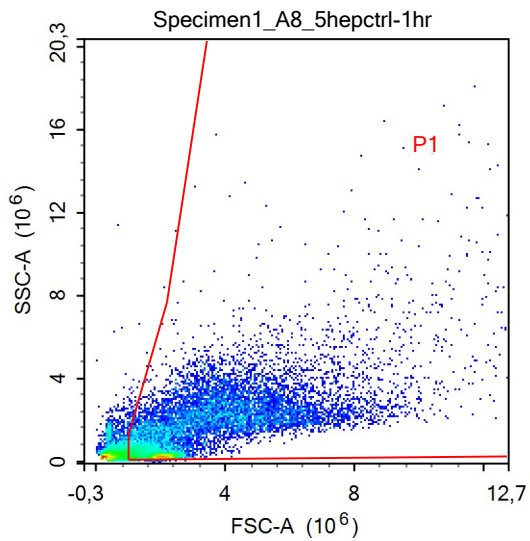

| Gate | Count  | % All   |
|------|--------|---------|
| All  | 29.180 | 100,00% |
| P1   | 17.635 | 60,44%  |

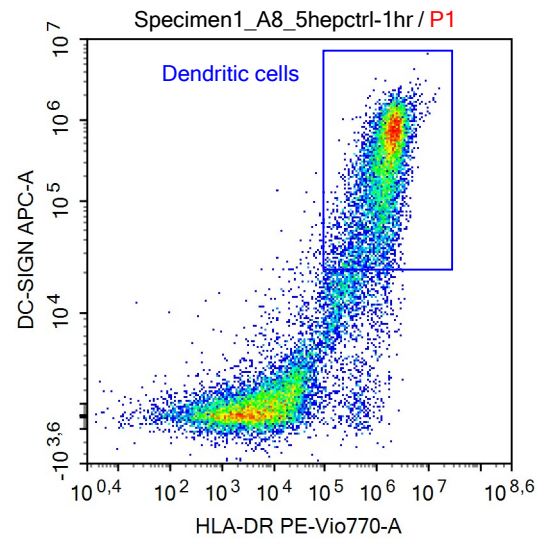

| Gate            | Count  | % P1    |
|-----------------|--------|---------|
| P1              | 17.635 | 100,00% |
| Dendritic cells | 7.200  | 40,83%  |

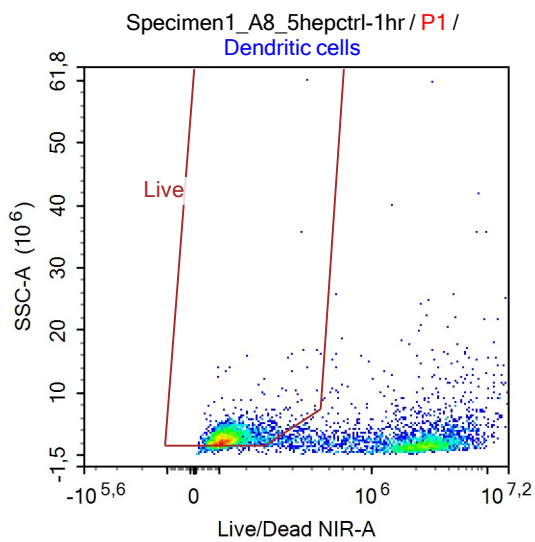

| Gate            | Count | % Dendritic cells |
|-----------------|-------|-------------------|
| Dendritic cells | 7.200 | 100,00%           |
| Live            | 3.927 | 54,54%            |

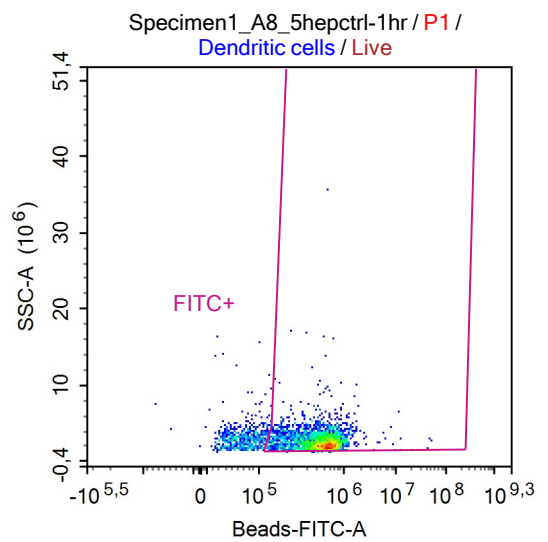

| Gate  | Count | % Live  |
|-------|-------|---------|
| Live  | 3.927 | 100,00% |
| FITC+ | 3.249 | 82,73%  |



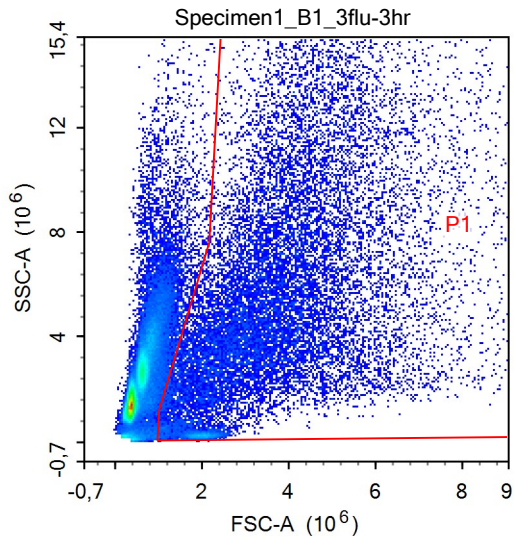

| Gate | Count   | % All   |
|------|---------|---------|
| All  | 219.310 | 100,00% |
| P1   | 24.144  | 11,01%  |

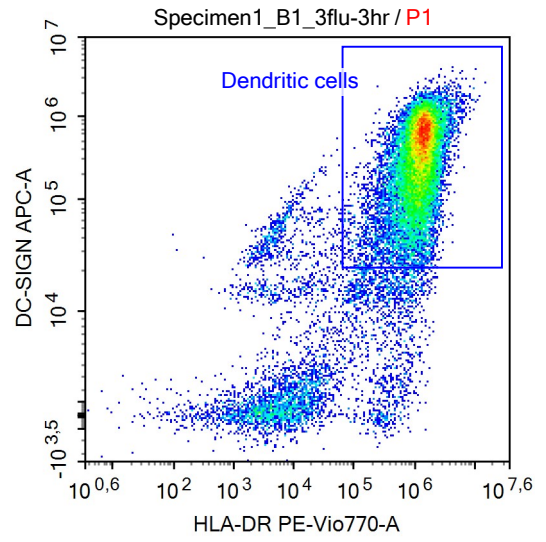

| Gate            | Count  | % P1    |
|-----------------|--------|---------|
| P1              | 24.144 | 100,00% |
| Dendritic cells | 19.132 | 79,24%  |

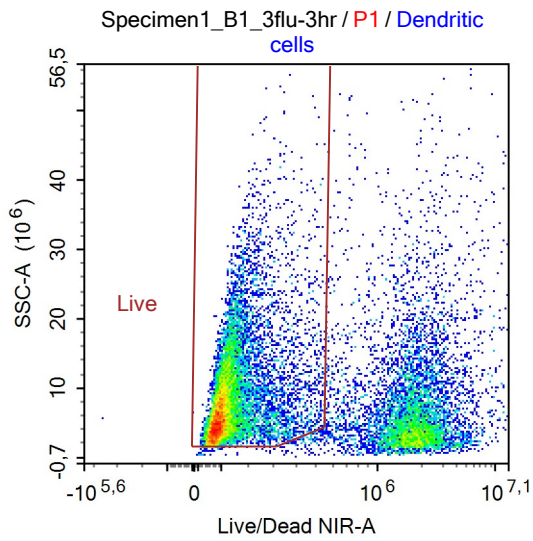

| Gate            | Count  | % Dendritic cells |
|-----------------|--------|-------------------|
| Dendritic cells | 19.132 | 100,00%           |
| Live            | 12.288 | 64,23%            |

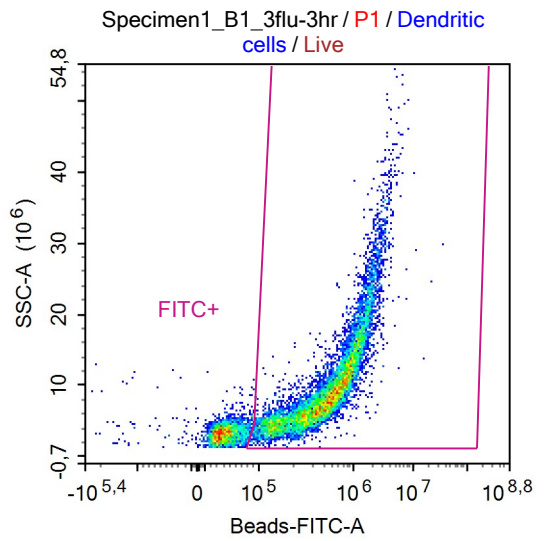

| Gate  | Count  | % Live  |
|-------|--------|---------|
| Live  | 12.288 | 100,00% |
| FITC+ | 9.880  | 80,40%  |

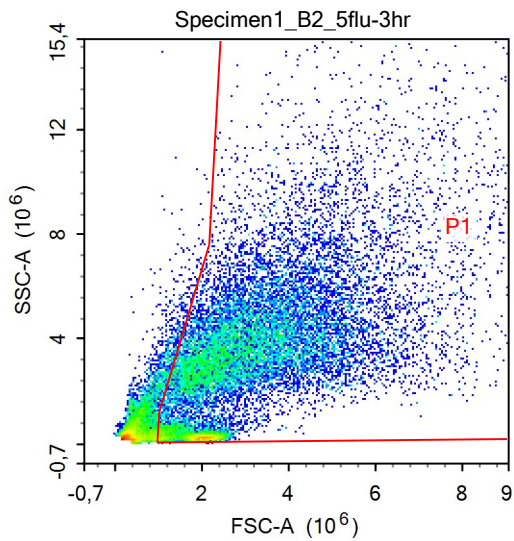

| Gate | Count  | % All   |
|------|--------|---------|
| All  | 31.682 | 100,00% |
| P1   | 20.105 | 63,46%  |

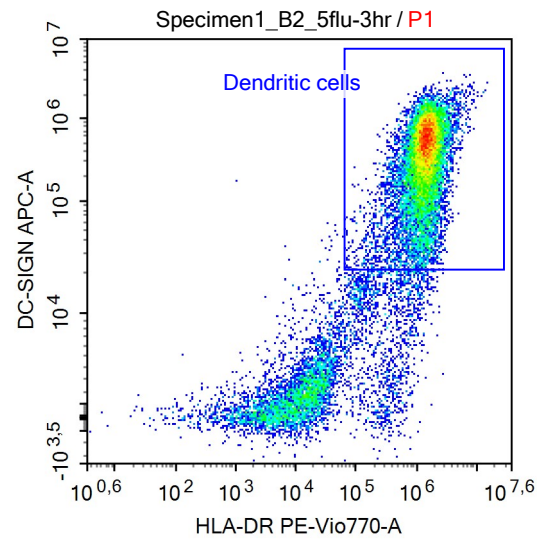

| Gate            | Count  | % P1    |
|-----------------|--------|---------|
| P1              | 20.105 | 100,00% |
| Dendritic cells | 14.147 | 70,37%  |

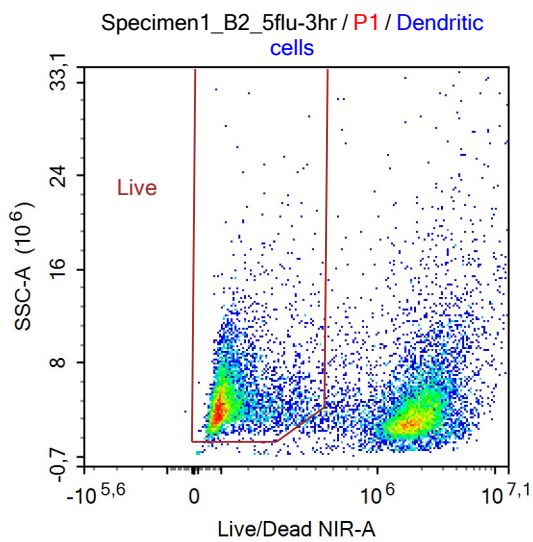

| Gate            | Count  | % Dendritic cells |
|-----------------|--------|-------------------|
| Dendritic cells | 14.147 | 100,00%           |
| Live            | 6.231  | 44,04%            |

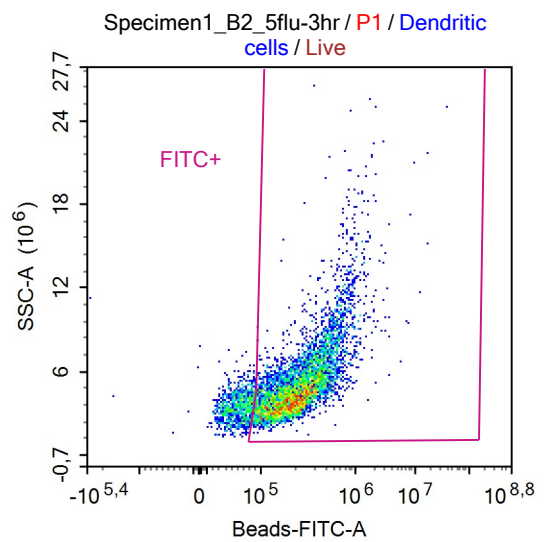

| Gate  | Count | % Live  |
|-------|-------|---------|
| Live  | 6.231 | 100,00% |
| FITC+ | 5.225 | 83,85%  |

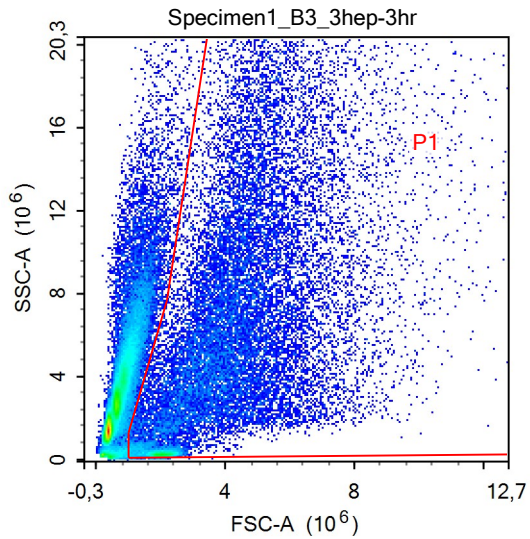

| Gate | Count   | % All   |
|------|---------|---------|
| All  | 146.170 | 100,00% |
| P1   | 30.405  | 20,80%  |

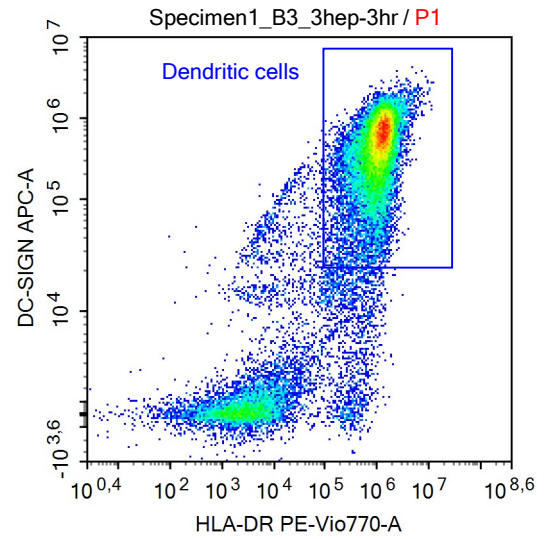

| Gate            | Count  | % P1    |
|-----------------|--------|---------|
| P1              | 30.405 | 100,00% |
| Dendritic cells | 21.842 | 71,84%  |

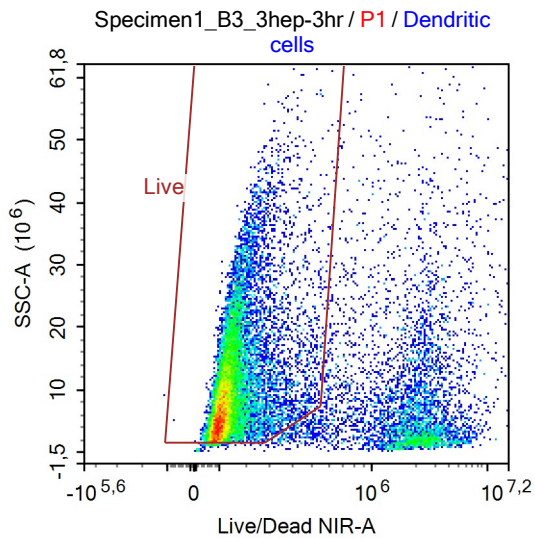

| Gate            | Count  | % Dendritic cells |
|-----------------|--------|-------------------|
| Dendritic cells | 21.842 | 100,00%           |
| Live            | 16.998 | 77,82%            |

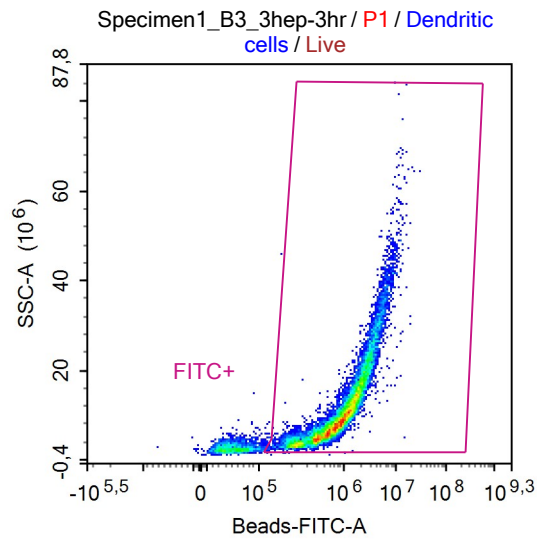

| Gate  | Count  | % Live  |
|-------|--------|---------|
| Live  | 16.998 | 100,00% |
| FITC+ | 14.975 | 88,10%  |

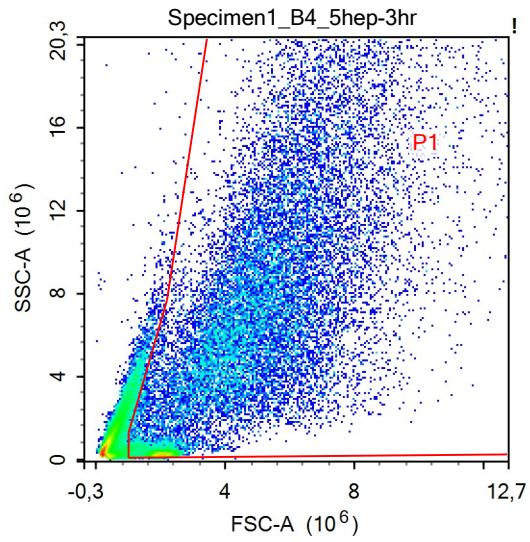

| Gate | Count  | % All   |
|------|--------|---------|
| All  | 55.074 | 100,00% |
| P1   | 28.120 | 51,06%  |

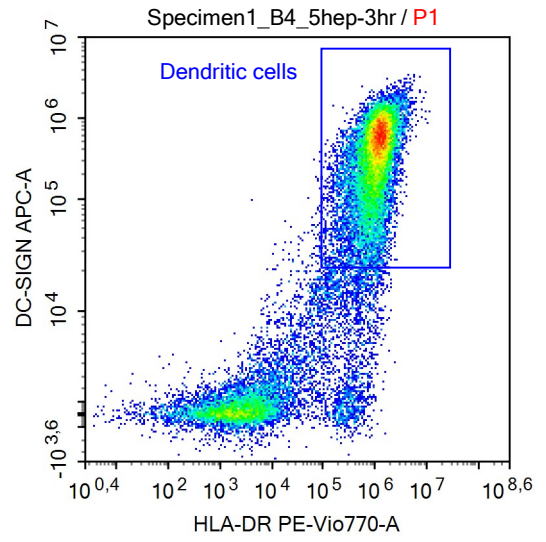

| Gate            | Count  | % P1    |
|-----------------|--------|---------|
| P1              | 28.120 | 100,00% |
| Dendritic cells | 18.394 | 65,41%  |

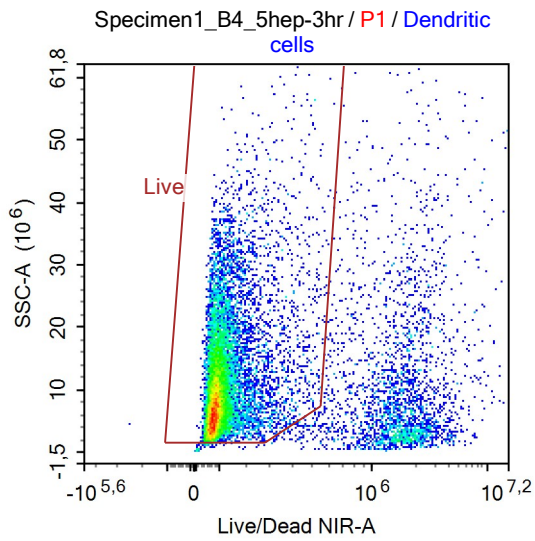

| Gate            | Count  | % Dendritic cells |
|-----------------|--------|-------------------|
| Dendritic cells | 18.394 | 100,00%           |
| Live            | 15.583 | 84,72%            |

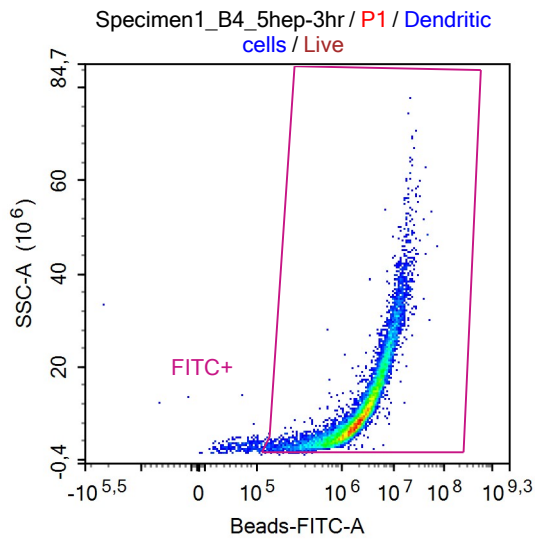

| Gate  | Count  | % Live  |
|-------|--------|---------|
| Live  | 15.583 | 100,00% |
| FITC+ | 15.243 | 97,82%  |



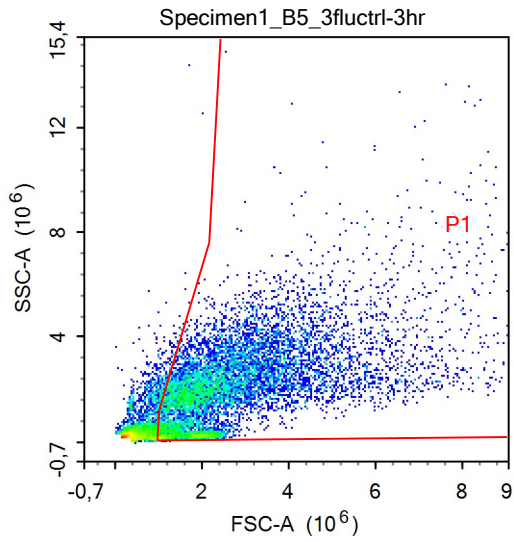

| Gate | Count  | % All   |
|------|--------|---------|
| All  | 17.763 | 100,00% |
| P1   | 9.689  | 54,55%  |

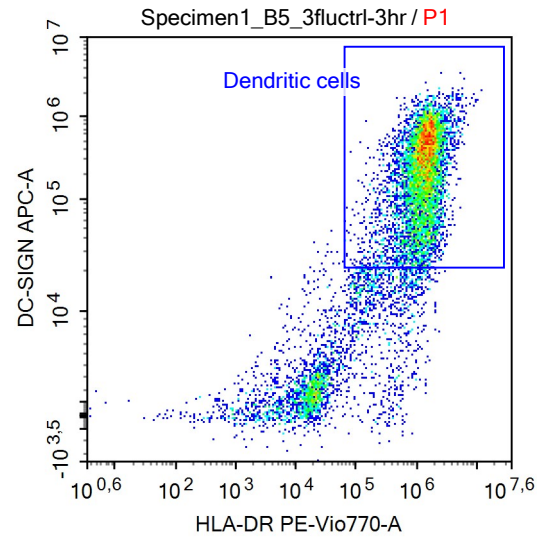

| Gate            | Count | % P1    |
|-----------------|-------|---------|
| P1              | 9.689 | 100,00% |
| Dendritic cells | 6.945 | 71,68%  |

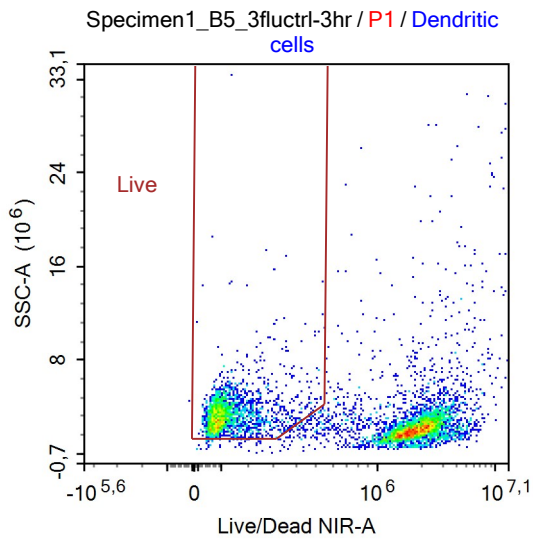

| Gate            | Count | % Dendritic cells |
|-----------------|-------|-------------------|
| Dendritic cells | 6.945 | 100,00%           |
| Live            | 2.564 | 36,92%            |

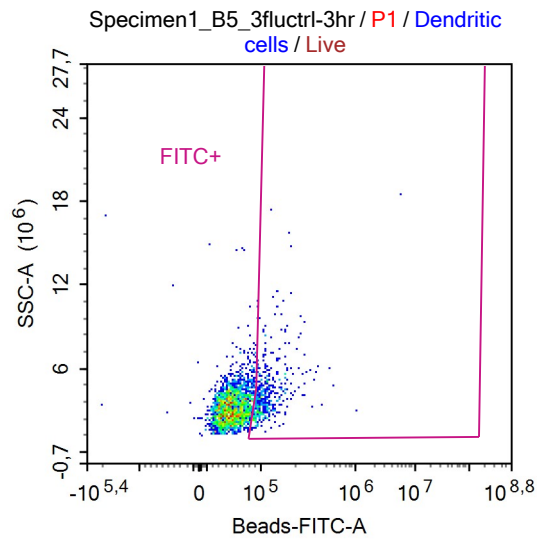

| Gate  | Count | % Live  |
|-------|-------|---------|
| Live  | 2.564 | 100,00% |
| FITC+ | 436   | 17,00%  |

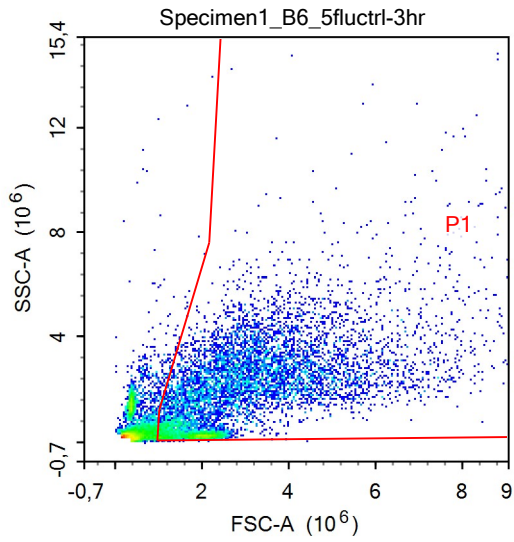

| Gate | Count  | % All   |
|------|--------|---------|
| All  | 18.028 | 100,00% |
| P1   | 8.427  | 46,74%  |

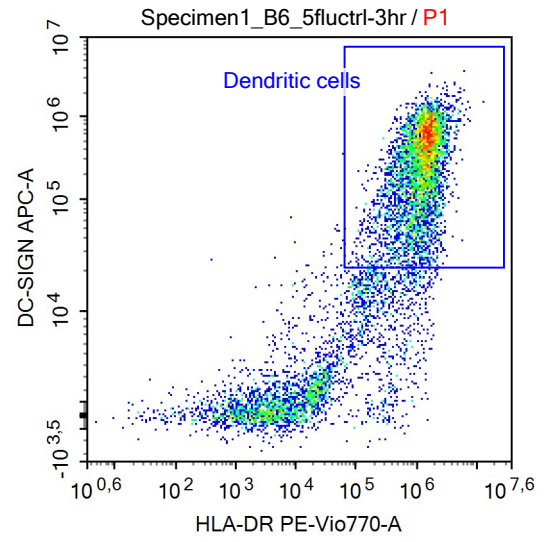

| Gate            | Count | % P1    |
|-----------------|-------|---------|
| P1              | 8.427 | 100,00% |
| Dendritic cells | 5.159 | 61,22%  |

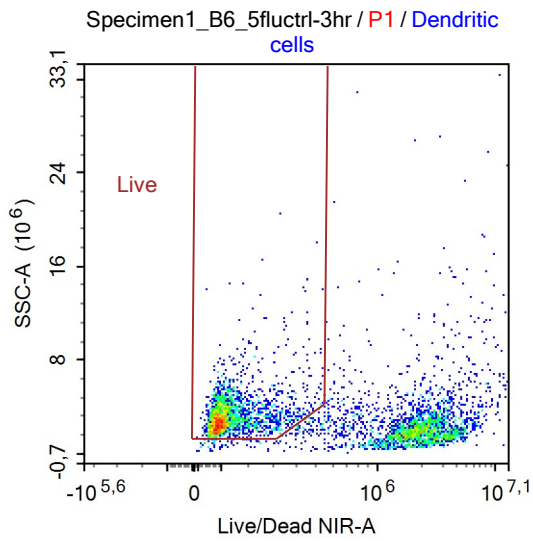

| Gate            | Count | % Dendritic cells |
|-----------------|-------|-------------------|
| Dendritic cells | 5.159 | 100,00%           |
| Live            | 2.670 | 51,75%            |

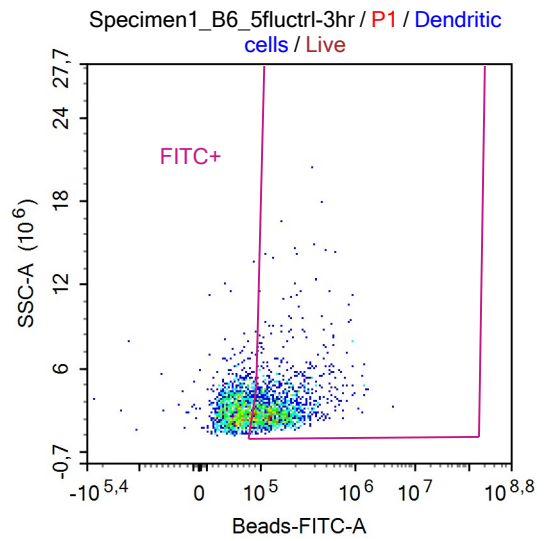

| Gate  | Count | % Live  |
|-------|-------|---------|
| Live  | 2.670 | 100,00% |
| FITC+ | 1.362 | 51,01%  |

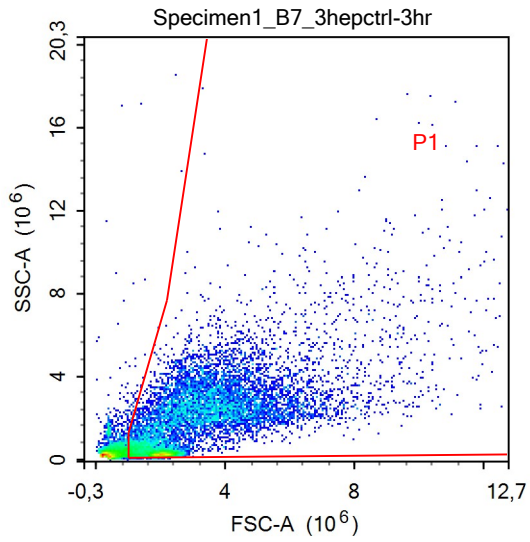

| Gate | Count  | % All   |
|------|--------|---------|
| All  | 21.606 | 100,00% |
| P1   | 12.670 | 58,64%  |

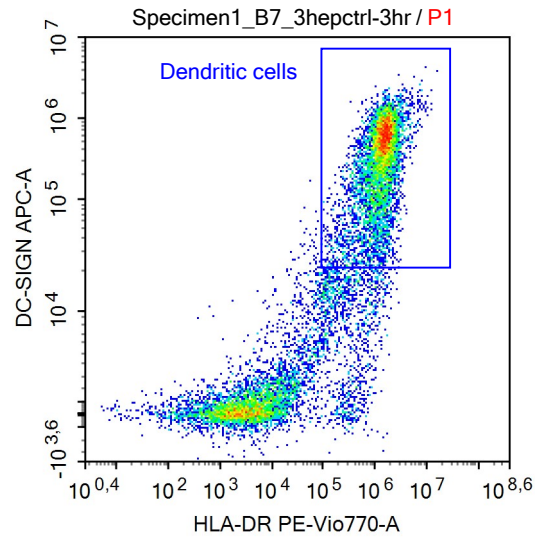

| Gate            | Count  | % P1    |
|-----------------|--------|---------|
| P1              | 12.670 | 100,00% |
| Dendritic cells | 6.380  | 50,36%  |

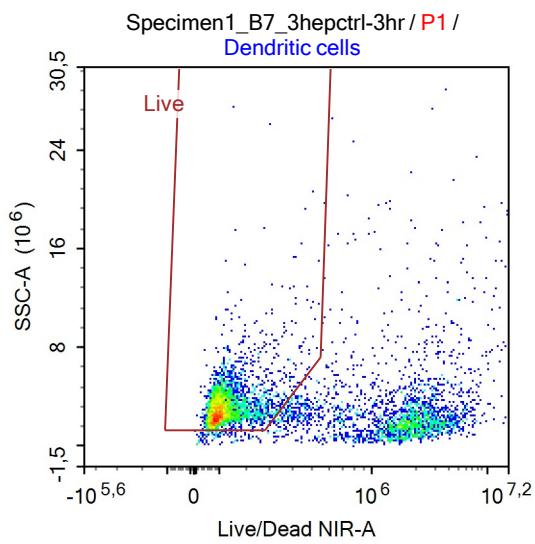

| Gate            | Count | % Dendritic cells |
|-----------------|-------|-------------------|
| Dendritic cells | 6.380 | 100,00%           |
| Live            | 3.940 | 61,76%            |

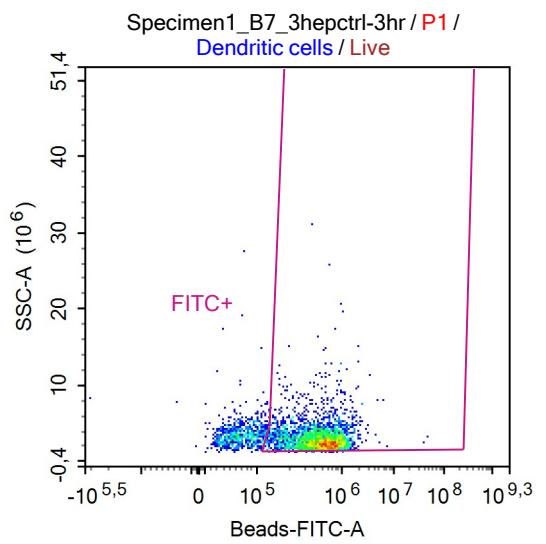

| Gate  | Count | % Live  |
|-------|-------|---------|
| Live  | 3.940 | 100,00% |
| FITC+ | 3.214 | 81,57%  |

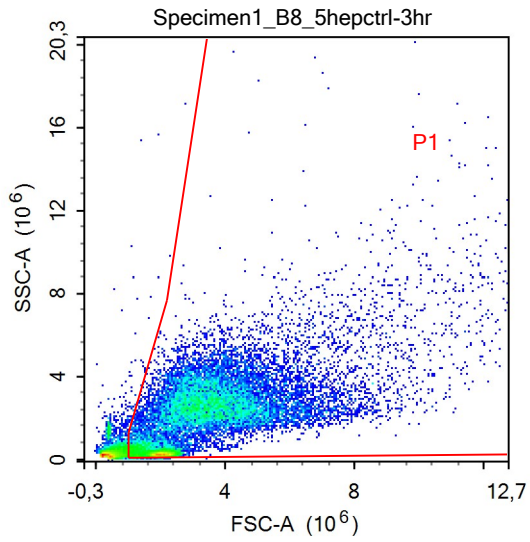

| Gate | Count  | % All   |
|------|--------|---------|
| All  | 30.738 | 100,00% |
| P1   | 20.319 | 66,10%  |

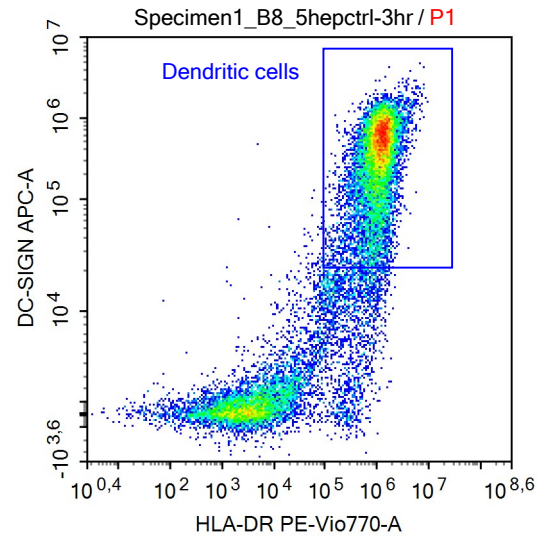

| Gate            | Count  | % P1    |
|-----------------|--------|---------|
| P1              | 20.319 | 100,00% |
| Dendritic cells | 11.878 | 58,46%  |

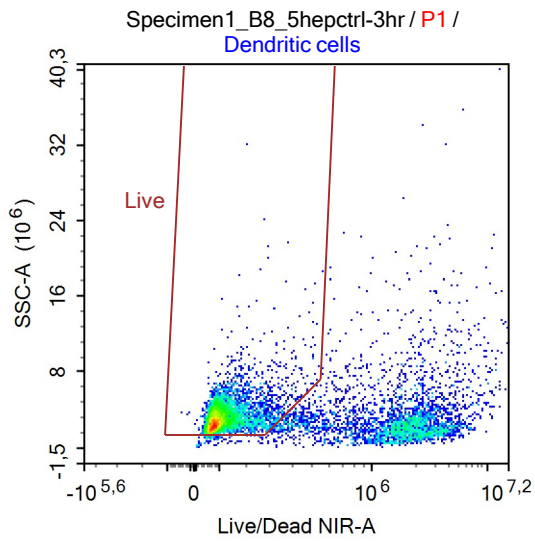

| Gate            | Count  | % Dendritic cells |
|-----------------|--------|-------------------|
| Dendritic cells | 11.878 | 100,00%           |
| Live            | 8.515  | 71,69%            |

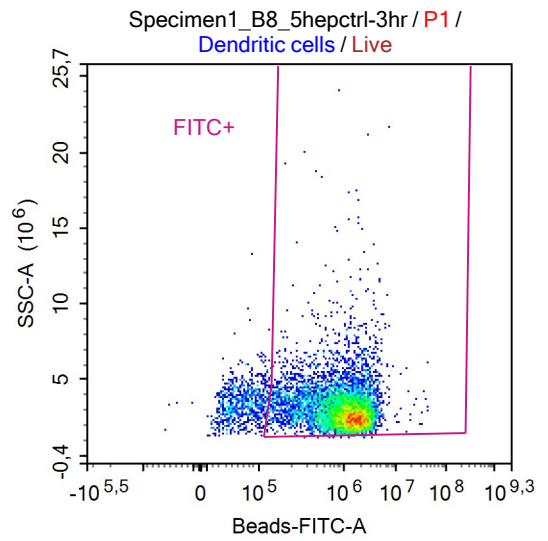

| Gate  | Count | % Live  |
|-------|-------|---------|
| Live  | 8.515 | 100,00% |
| FITC+ | 7.671 | 90,09%  |



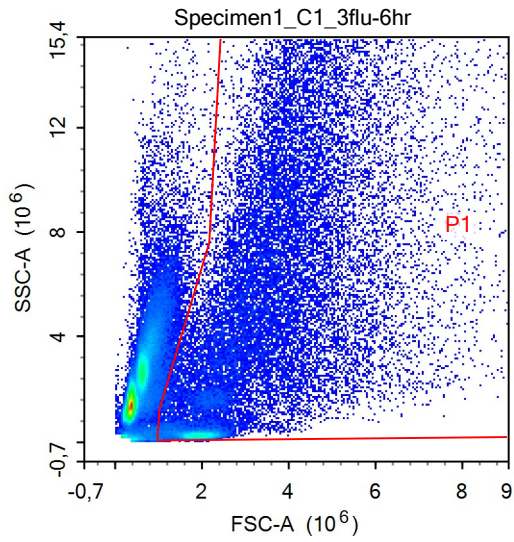

| Gate | Count   | % All   |
|------|---------|---------|
| All  | 257.344 | 100,00% |
| P1   | 43.851  | 17,04%  |

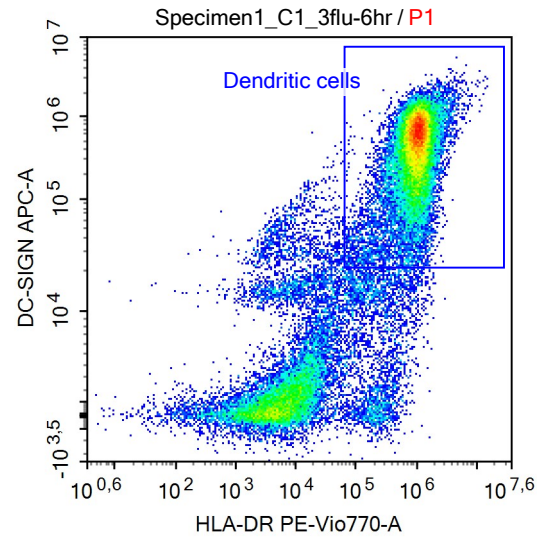

| Gate            | Count  | % P1    |
|-----------------|--------|---------|
| P1              | 43.851 | 100,00% |
| Dendritic cells | 25.792 | 58,82%  |

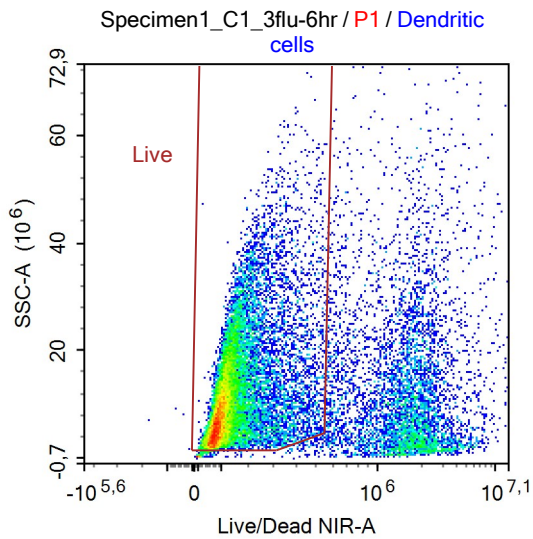

| Gate            | Count  | % Dendritic cells |
|-----------------|--------|-------------------|
| Dendritic cells | 25.792 | 100,00%           |
| Live            | 19.496 | 75,59%            |

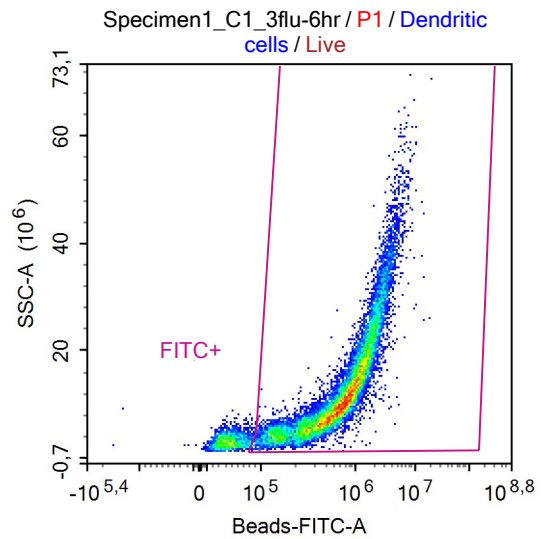

| Gate  | Count  | % Live  |
|-------|--------|---------|
| Live  | 19.496 | 100,00% |
| FITC+ | 17.339 | 88,94%  |

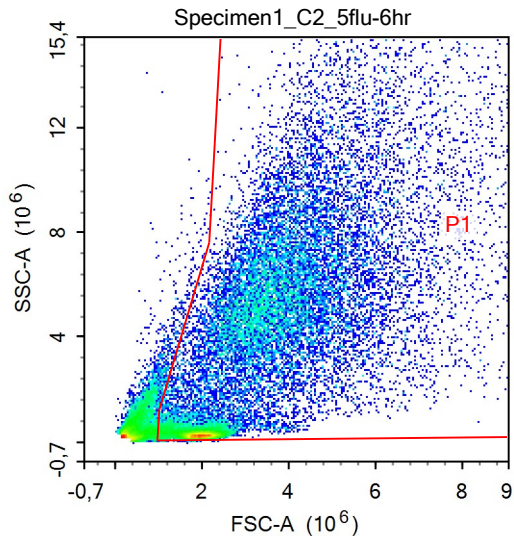

| Gate | Count  | % All   |
|------|--------|---------|
| All  | 46.559 | 100,00% |
| P1   | 33.177 | 71,26%  |

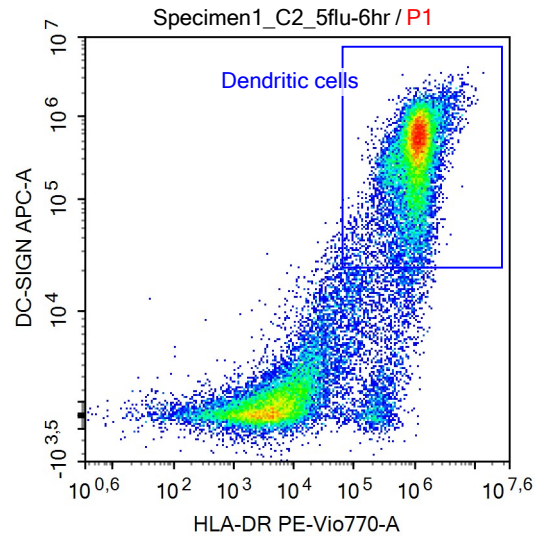

| Gate            | Count  | % P1    |
|-----------------|--------|---------|
| P1              | 33.177 | 100,00% |
| Dendritic cells | 16.337 | 49,24%  |

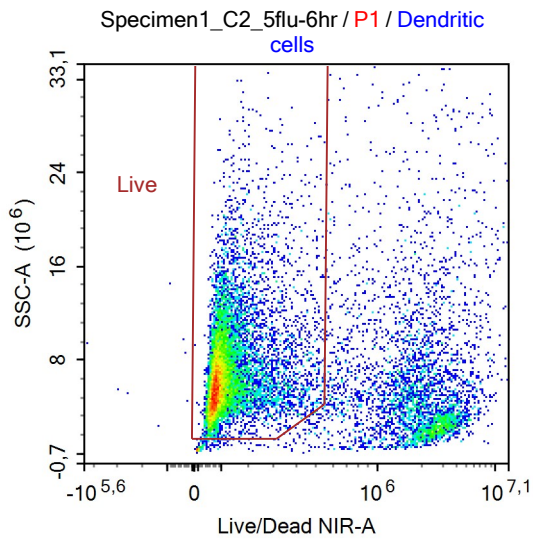

| Gate            | Count  | % Dendritic cells |
|-----------------|--------|-------------------|
| Dendritic cells | 16.337 | 100,00%           |
| Live            | 12.068 | 73,87%            |

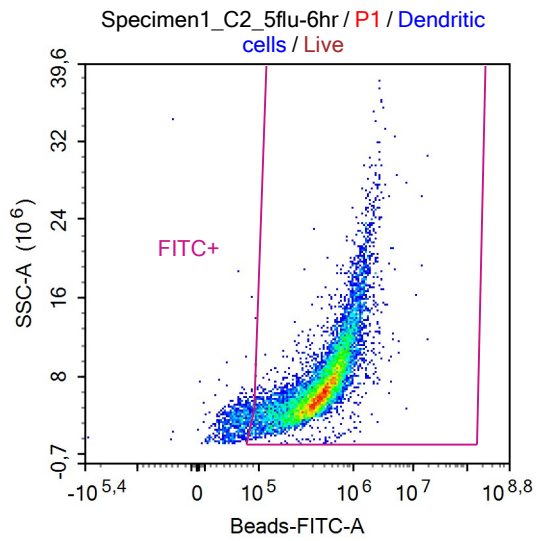

| Gate  | Count  | % Live  |
|-------|--------|---------|
| Live  | 12.068 | 100,00% |
| FITC+ | 11.347 | 94,03%  |

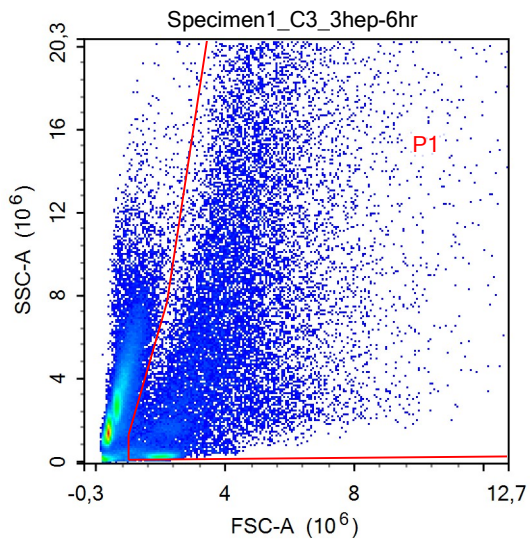

| Gate | Count   | % All   |
|------|---------|---------|
| All  | 220.768 | 100,00% |
| P1   | 38.906  | 17,62%  |

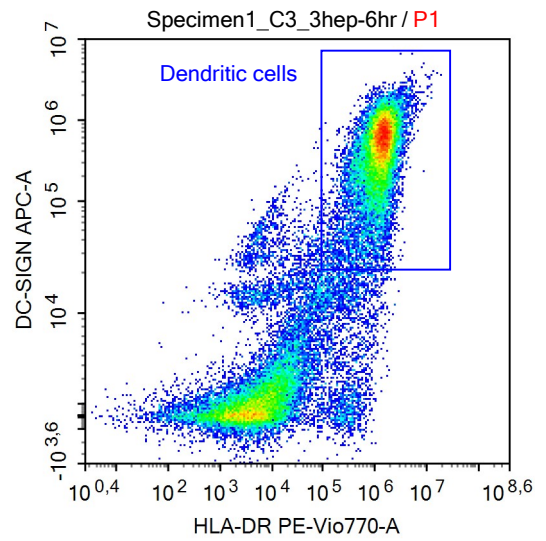

| Gate            | Count  | % P1    |
|-----------------|--------|---------|
| P1              | 38.906 | 100,00% |
| Dendritic cells | 18.726 | 48,13%  |

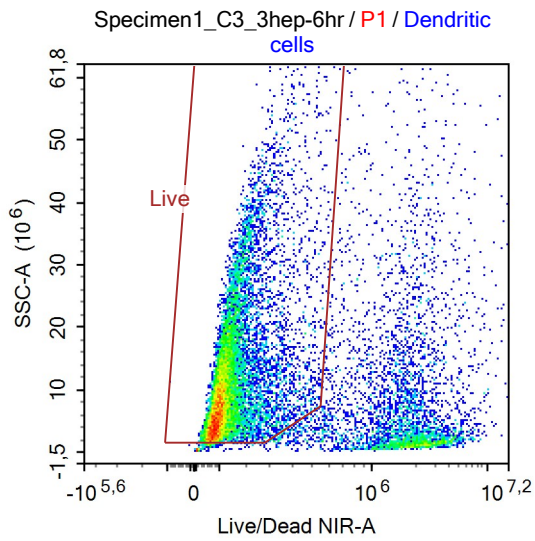

| Gate            | Count  | % Dendritic cells |
|-----------------|--------|-------------------|
| Dendritic cells | 18.726 | 100,00%           |
| Live            | 14.246 | 76,08%            |

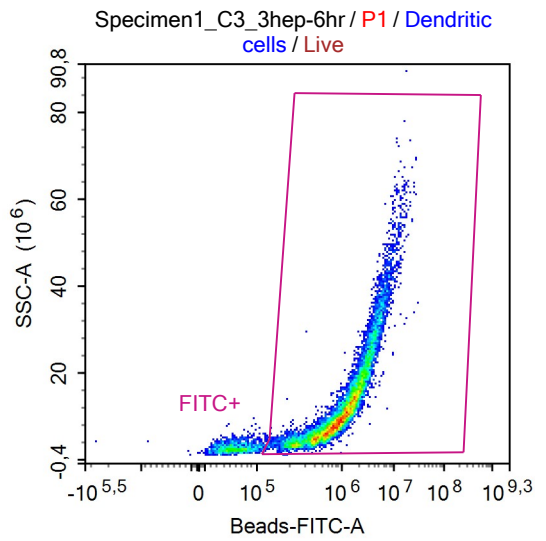

| Gate  | Count  | % Live  |
|-------|--------|---------|
| Live  | 14.246 | 100,00% |
| FITC+ | 12.513 | 87,84%  |

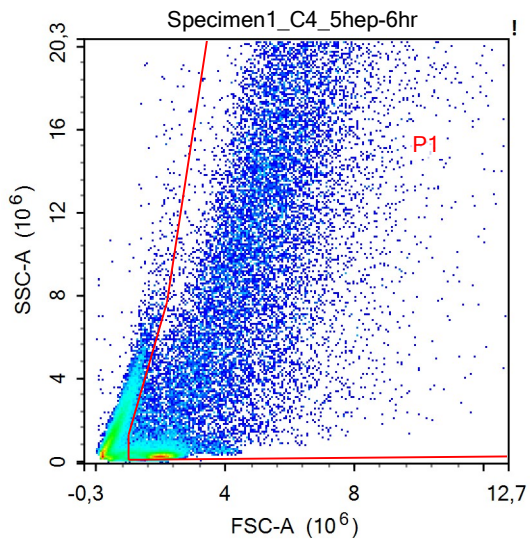

| Gate | Count  | % All   |
|------|--------|---------|
| All  | 70.351 | 100,00% |
| P1   | 41.895 | 59,55%  |

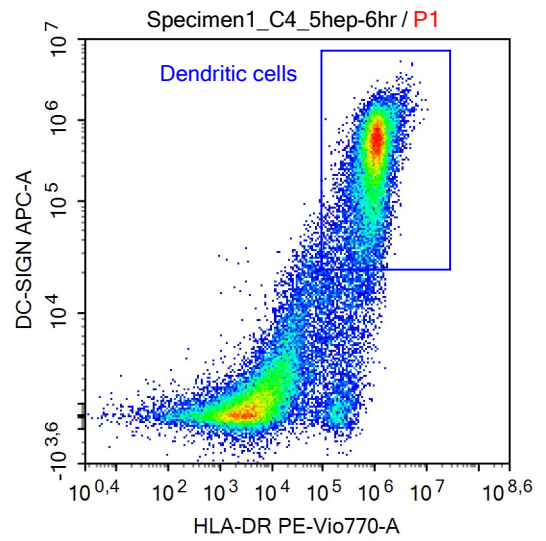

| Gate            | Count  | % P1    |
|-----------------|--------|---------|
| P1              | 41.895 | 100,00% |
| Dendritic cells | 17.353 | 41,42%  |

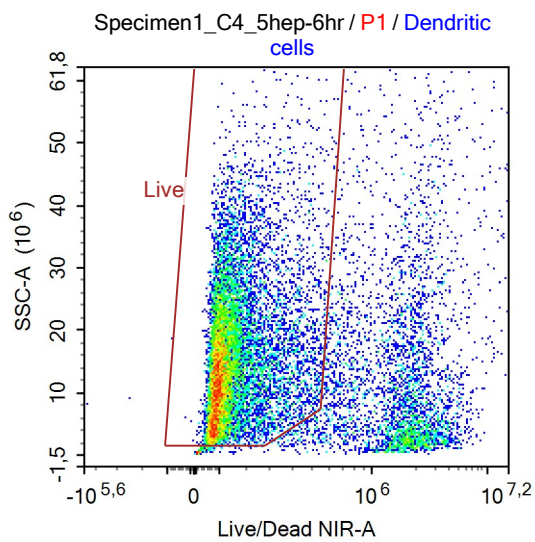

| Gate            | Count  | % Dendritic cells |
|-----------------|--------|-------------------|
| Dendritic cells | 17.353 | 100,00%           |
| Live            | 13.056 | 75,24%            |

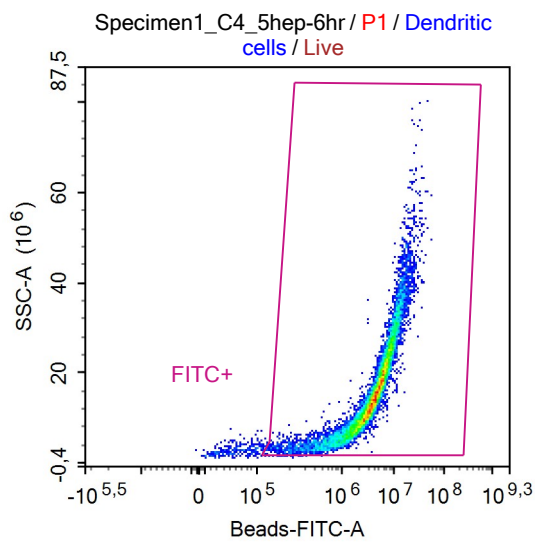

| Gate  | Count  | % Live  |
|-------|--------|---------|
| Live  | 13.056 | 100,00% |
| FITC+ | 12.742 | 97,59%  |



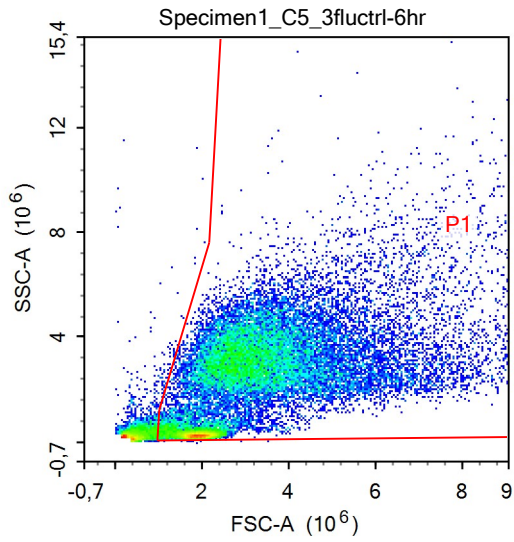

| Gate | Count  | % All   |
|------|--------|---------|
| All  | 40.616 | 100,00% |
| P1   | 32.634 | 80,35%  |

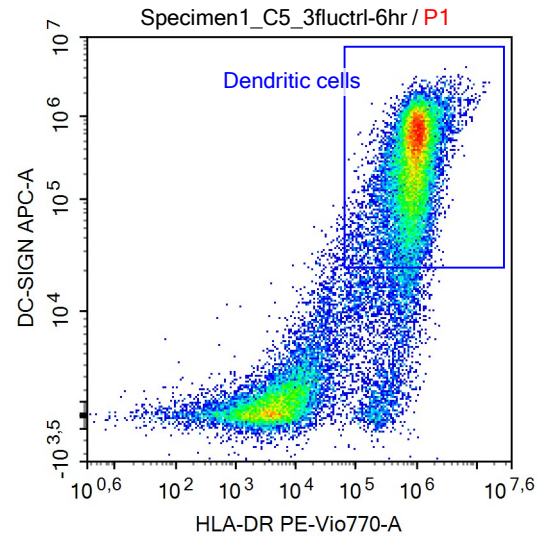

| Gate            | Count  | % P1    |
|-----------------|--------|---------|
| P1              | 32.634 | 100,00% |
| Dendritic cells | 18.975 | 58,14%  |

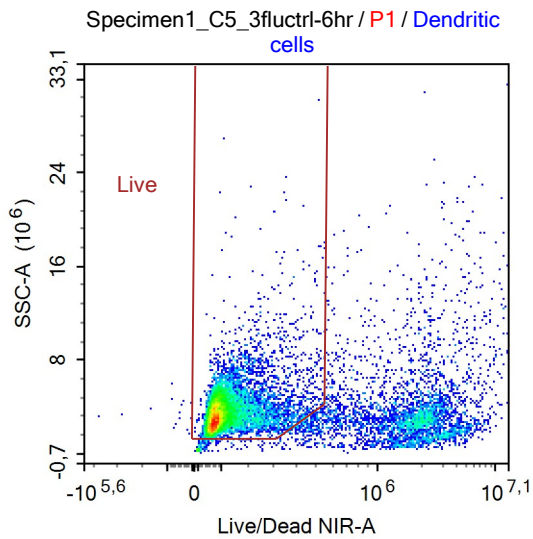

| Gate            | Count  | % Dendritic cells |
|-----------------|--------|-------------------|
| Dendritic cells | 18.975 | 100,00%           |
| Live            | 14.836 | 78,19%            |

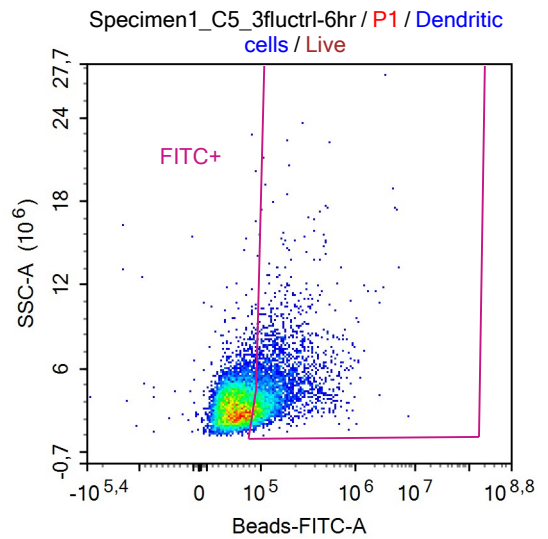

| Gate  | Count  | % Live  |
|-------|--------|---------|
| Live  | 14.836 | 100,00% |
| FITC+ | 4.028  | 27,15%  |

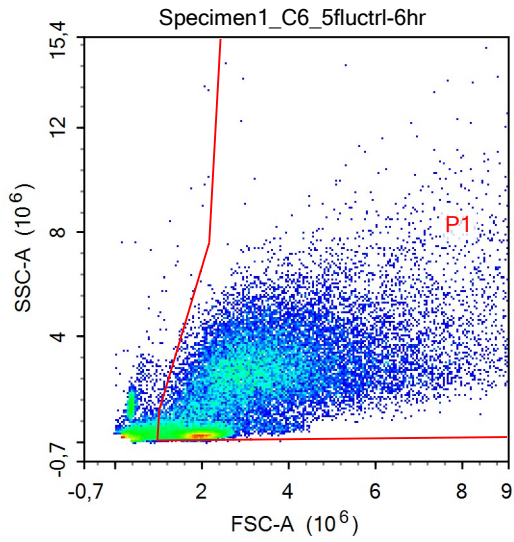

| Gate | Count  | % All   |
|------|--------|---------|
| All  | 50.549 | 100,00% |
| P1   | 39.867 | 78,87%  |

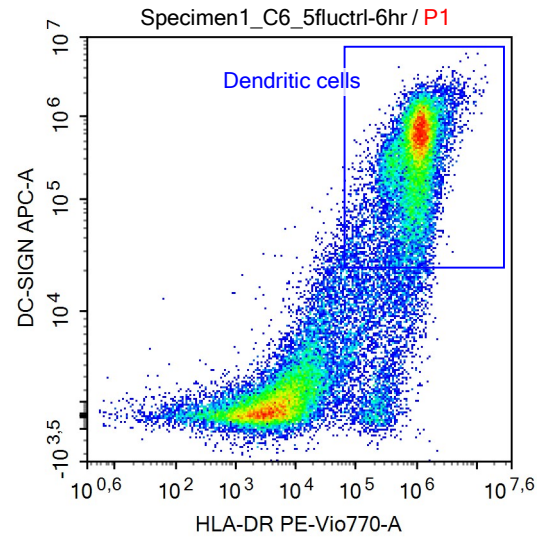

| Gate            | Count  | % P1    |
|-----------------|--------|---------|
| P1              | 39.867 | 100,00% |
| Dendritic cells | 17.251 | 43,27%  |

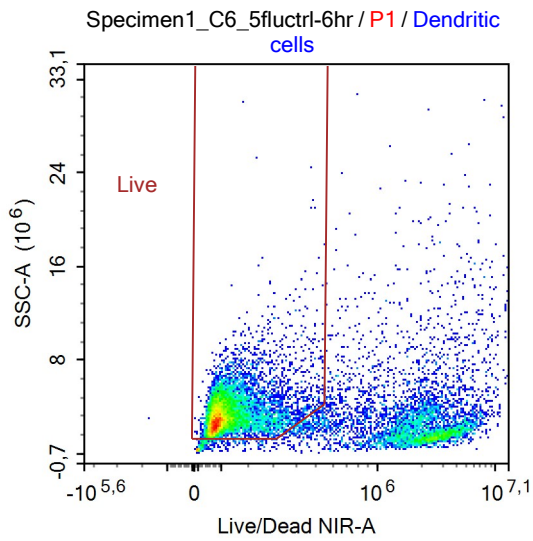

| Gate            | Count  | % Dendritic cells |
|-----------------|--------|-------------------|
| Dendritic cells | 17.251 | 100,00%           |
| Live            | 11.761 | 68,18%            |

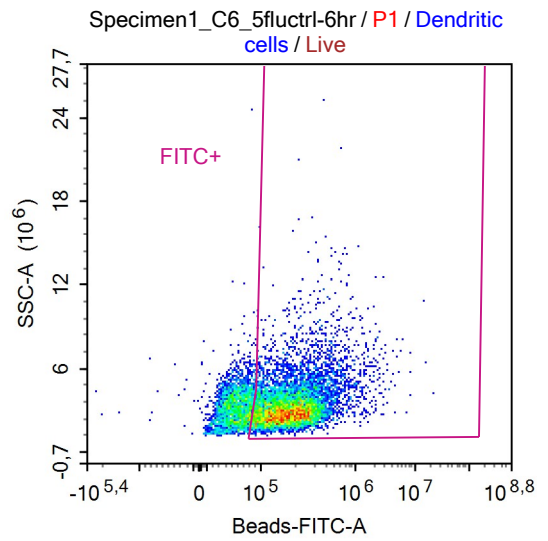

| Gate  | Count  | % Live  |
|-------|--------|---------|
| Live  | 11.761 | 100,00% |
| FITC+ | 8.591  | 73,05%  |

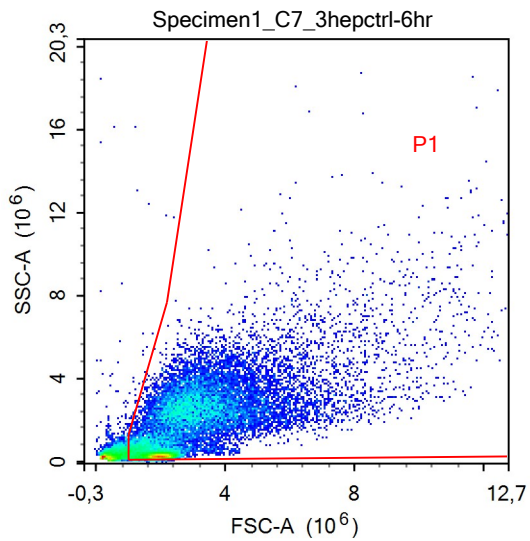

| Gate | Count  | % All   |
|------|--------|---------|
| All  | 38.366 | 100,00% |
| P1   | 27.628 | 72,01%  |

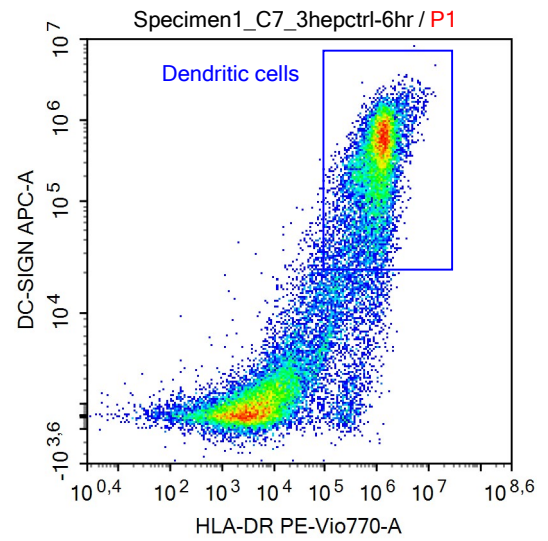

| Gate            | Count  | % P1    |
|-----------------|--------|---------|
| P1              | 27.628 | 100,00% |
| Dendritic cells | 11.228 | 40,64%  |

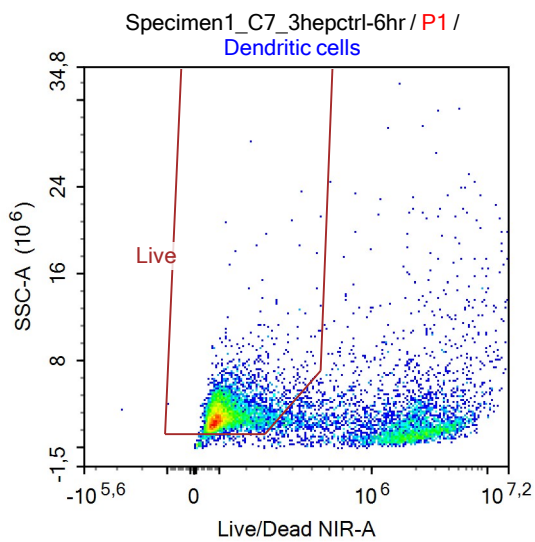

| Gate            | Count  | % Dendritic cells |
|-----------------|--------|-------------------|
| Dendritic cells | 11.228 | 100,00%           |
| Live            | 7.078  | 63,04%            |

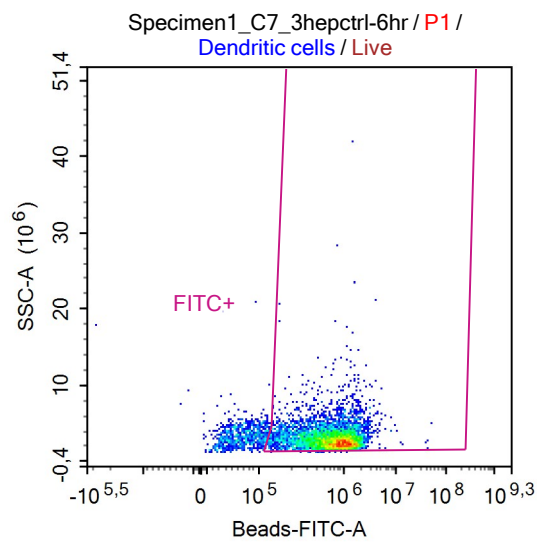

| Gate  | Count | % Live  |
|-------|-------|---------|
| Live  | 7.078 | 100,00% |
| FITC+ | 6.179 | 87,30%  |

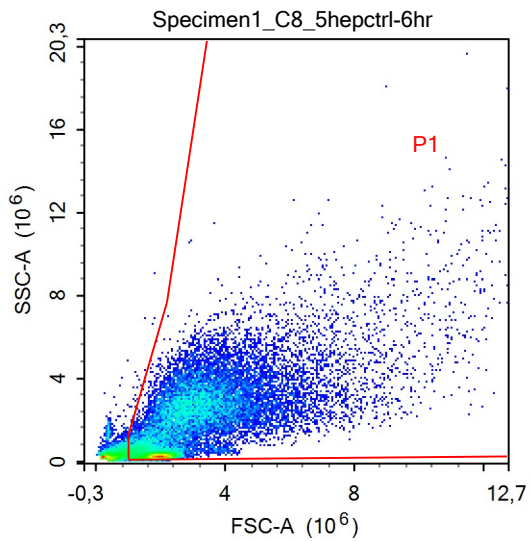

| Gate | Count  | % All   |
|------|--------|---------|
| All  | 42.322 | 100,00% |
| P1   | 31.366 | 74,11%  |

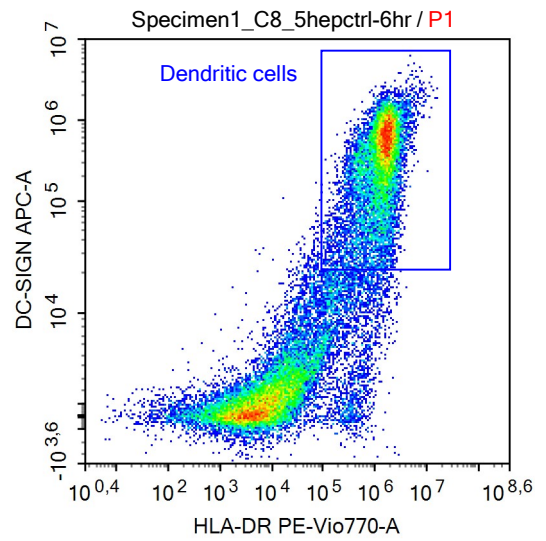

| Gate            | Count  | % P1    |
|-----------------|--------|---------|
| P1              | 31.366 | 100,00% |
| Dendritic cells | 12.630 | 40,27%  |

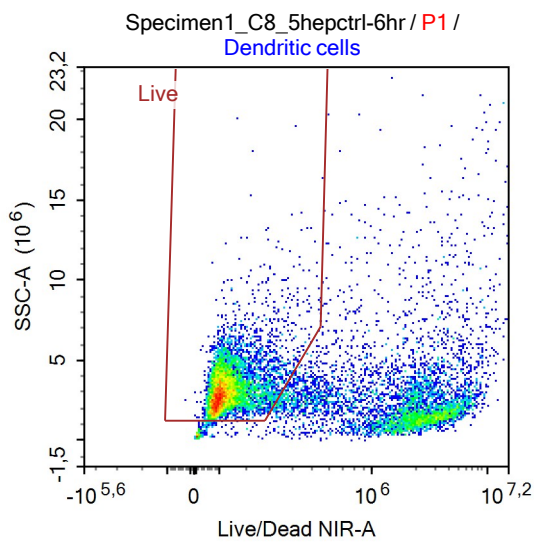

| Gate            | Count  | % Dendritic cells |
|-----------------|--------|-------------------|
| Dendritic cells | 12.630 | 100,00%           |
| Live            | 7.340  | 58,12%            |

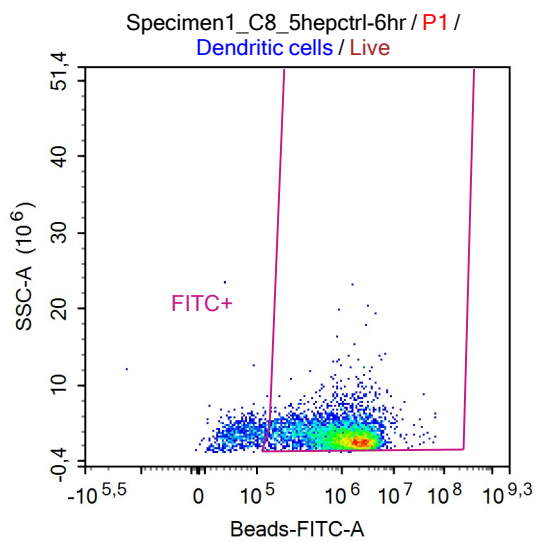

| Gate  | Count | % Live  |
|-------|-------|---------|
| Live  | 7.340 | 100,00% |
| FITC+ | 6.605 | 89,99%  |

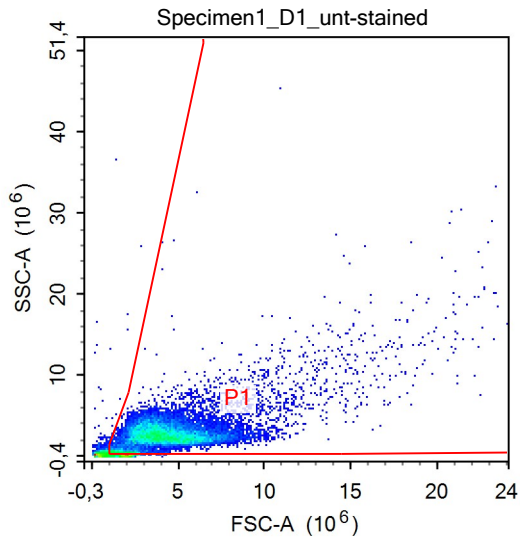

| Gate | Count  | % All   |
|------|--------|---------|
| All  | 32.009 | 100,00% |
| P1   | 24.511 | 76,58%  |

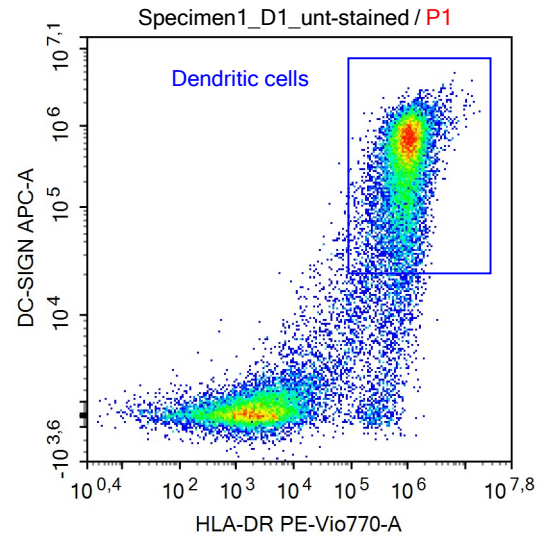

| Gate            | Count  | % P1    |
|-----------------|--------|---------|
| P1              | 24.511 | 100,00% |
| Dendritic cells | 12.236 | 49,92%  |

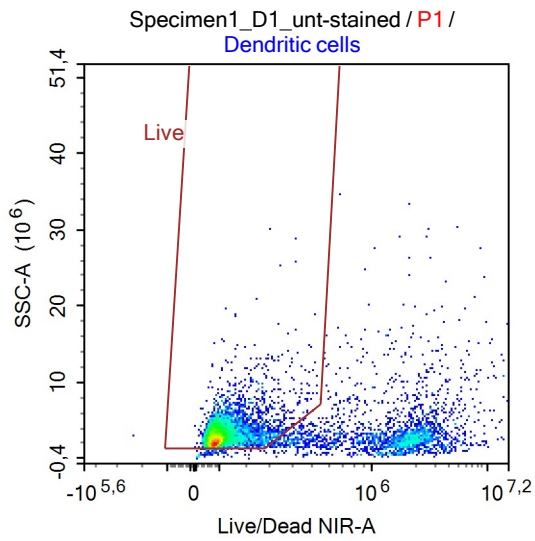

| Gate            | Count  | % Dendritic cells |
|-----------------|--------|-------------------|
| Dendritic cells | 12.236 | 100,00%           |
| Live            | 9.839  | 80,41%            |

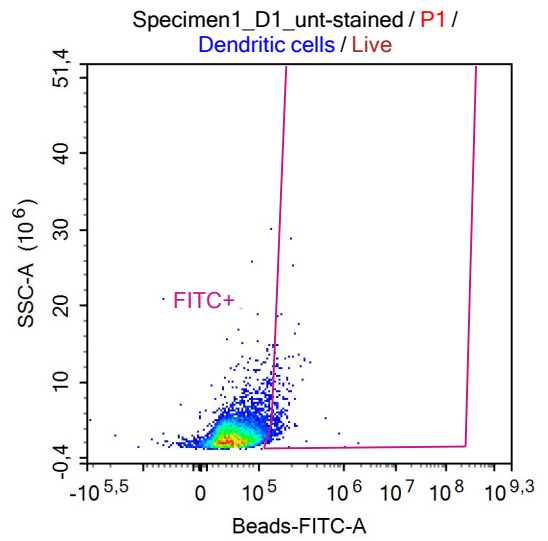

| Gate  | Count | % Live  |
|-------|-------|---------|
| Live  | 9.839 | 100,00% |
| FITC+ | 165   | 1,68%   |



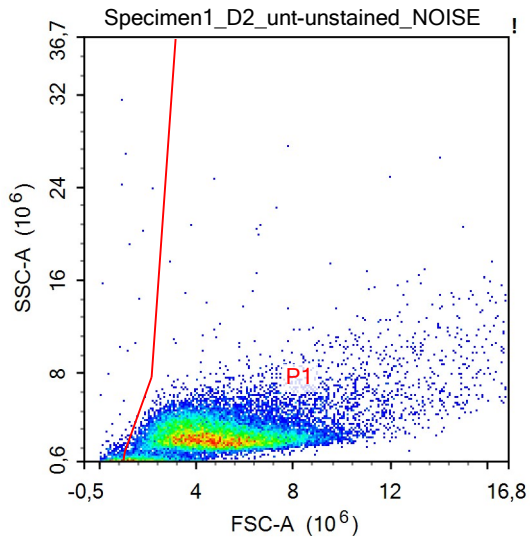

| Gate | Count  | % All   |
|------|--------|---------|
| All  | 45.422 | 100,00% |
| P1   | 37.646 | 82,88%  |

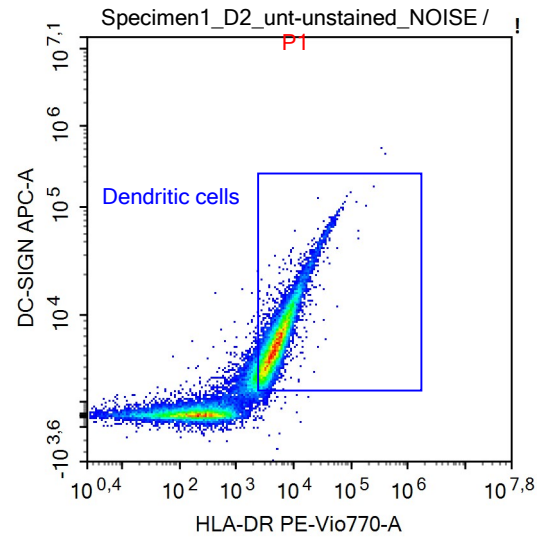

| Gate            | Count  | % P1    |
|-----------------|--------|---------|
| P1              | 37.646 | 100,00% |
| Dendritic cells | 17.638 | 46,85%  |

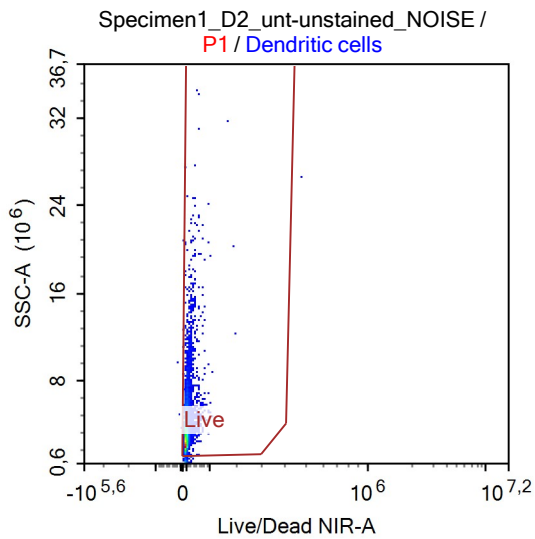

| Gate            | Count  | % Dendritic cells |
|-----------------|--------|-------------------|
| Dendritic cells | 17.638 | 100,00%           |
| Live            | 17.236 | 97,72%            |

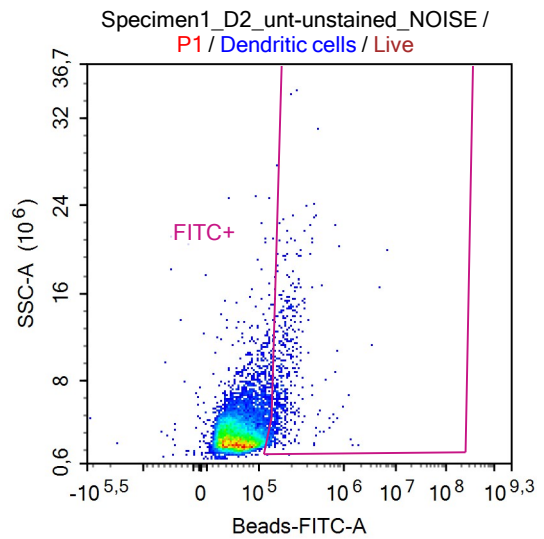

| Gate  | Count  | % Live  |
|-------|--------|---------|
| Live  | 17.236 | 100,00% |
| FITC+ | 544    | 3,16%   |

Donor 48 FLU

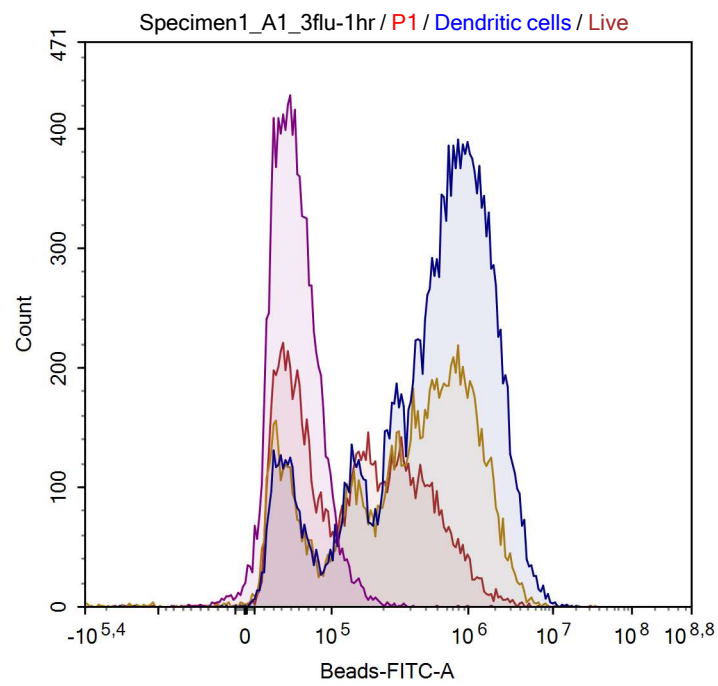

| # | Sample                 | Gate  | Count  | Mean X  | Median X |
|---|------------------------|-------|--------|---------|----------|
| 1 | Specimen1_A1_3flu-1hr  | Live  | 10.059 | 238.456 | 135.271  |
| 2 | Specimen1_B1_3flu-3hr  | Live* | 12.288 | 581.865 | 336.735  |
| 3 | Specimen1_C1_3flu-6hr  | Live* | 19.496 | 898.968 | 574.998  |
| 4 | Specimen1_D1_untreated | Live* | 9.839  | 55.326  | 51.407   |

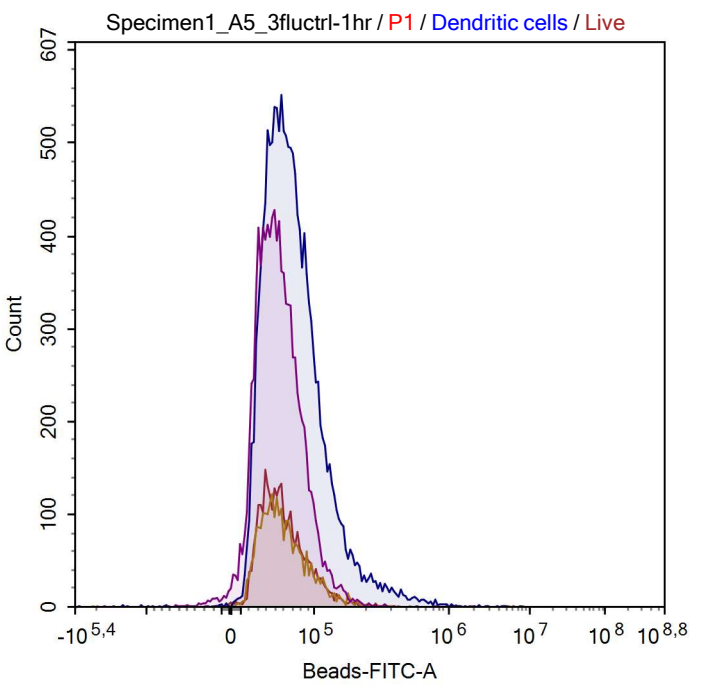

| # | Sample                    | Gate  | Count  | Mean X | Median X |
|---|---------------------------|-------|--------|--------|----------|
| 1 | Specimen1_A5_3fluctrl-1hr | Live  | 2.855  | 67.465 | 55.033   |
| 2 | Specimen1_B5_3fluctrl-3hr | Live* | 2.564  | 64.231 | 55.131   |
| 3 | Specimen1_C5_3fluctrl-6hr | Live* | 14.836 | 80.145 | 65.771   |
| 4 | Specimen1_D1_untreated    | Live* | 9.839  | 55.326 | 51.407   |

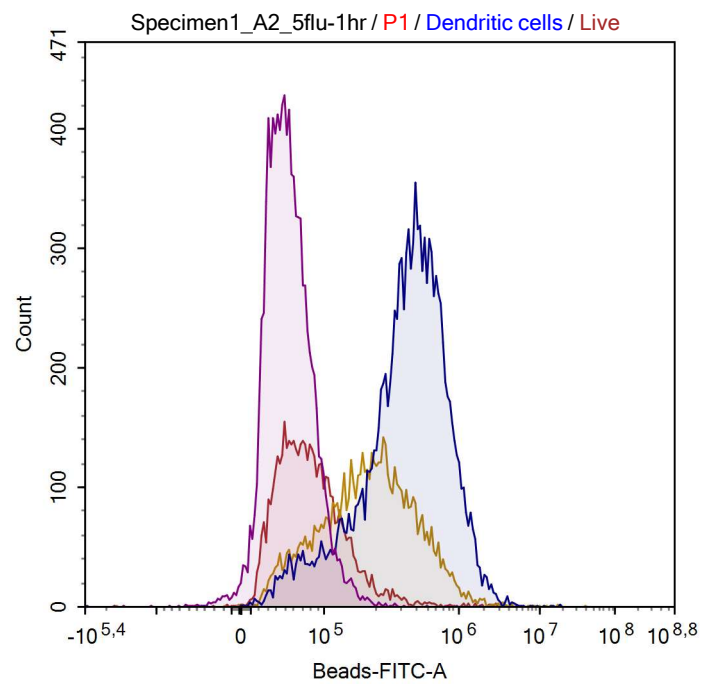

| # | Sample                 | Gate  | Count  | Mean X  | Median X |
|---|------------------------|-------|--------|---------|----------|
| 1 | Specimen1_A2_5flu-1hr  | Live  | 4.809  | 102.458 | 75.179   |
| 2 | Specimen1_B2_5flu-3hr  | Live* | 6.231  | 276.649 | 184.316  |
| 3 | Specimen1_C2_5flu-6hr  | Live* | 12.068 | 466.762 | 356.032  |
| 4 | Specimen1_D1_untreated | Live* | 9.839  | 55.326  | 51.407   |

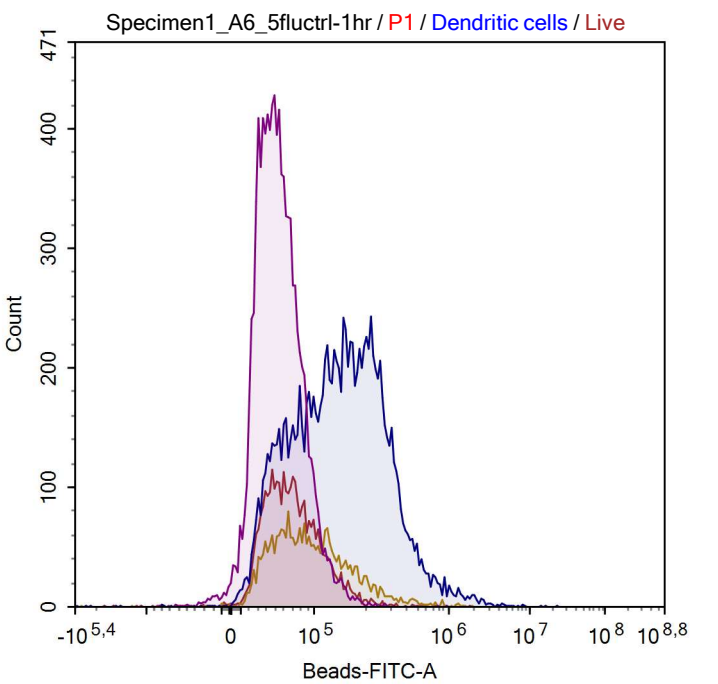

| # | Sample                    | Gate  | Count  | Mean X  | Median X |
|---|---------------------------|-------|--------|---------|----------|
| 1 | Specimen1_A6_5fluctrl-1hr | Live  | 3.129  | 74.690  | 67.320   |
| 2 | Specimen1_B6_5fluctrl-3hr | Live* | 2.670  | 117.200 | 89.041   |
| 3 | Specimen1_C6_5fluctrl-6hr | Live* | 11.761 | 197.478 | 140.344  |
| 4 | Specimen1_D1_untreated    | Live* | 9.839  | 55.326  | 51.407   |

Donor 48 HEP

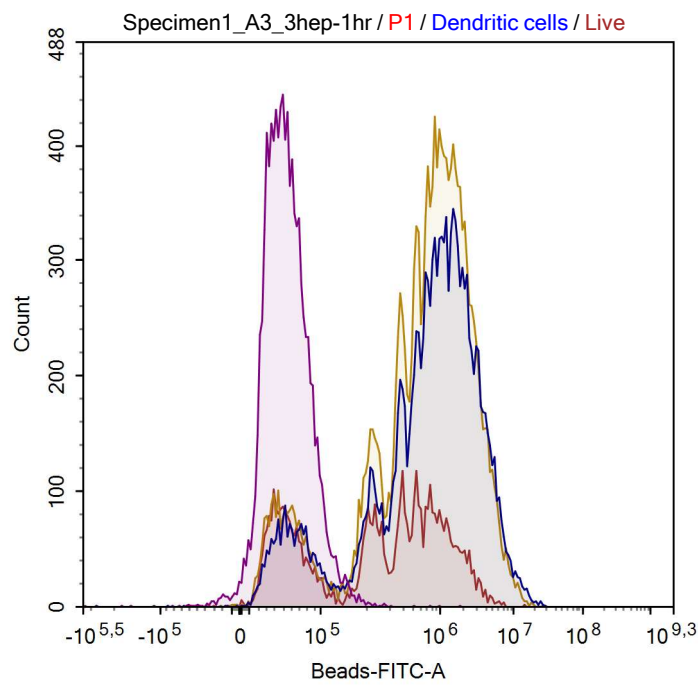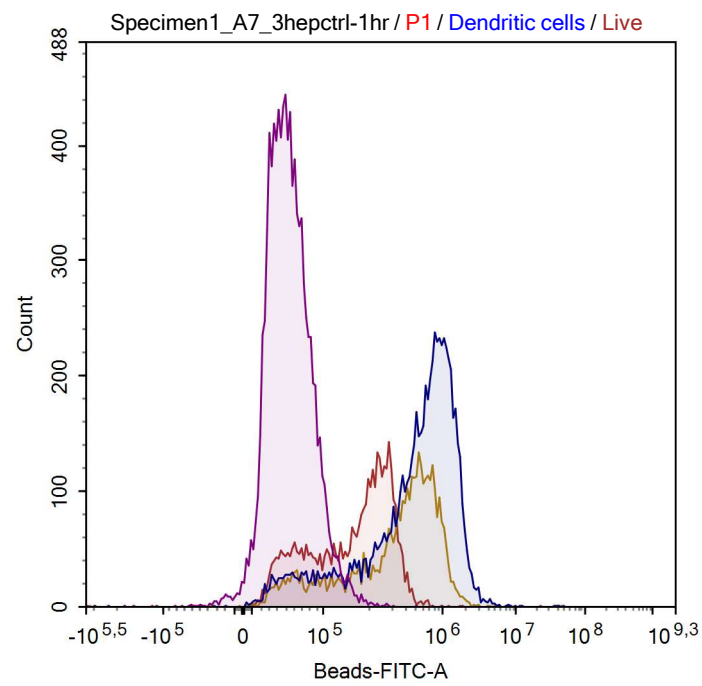

| # | Sample                 | Gate  | Count  | Mean X    | Median X | # | Sample                    | Gate  | Count | Mean X  | Median X |
|---|------------------------|-------|--------|-----------|----------|---|---------------------------|-------|-------|---------|----------|
| 1 | Specimen1_A3_3hep-1hr  | Live  | 5.294  | 595.659   | 291.612  | 1 | Specimen1_A7_3hepctrl-1hr | Live  | 3.975 | 196.757 | 175.293  |
| 2 | Specimen1_B3_3hep-3hr  | Live* | 16.998 | 1.315.019 | 814.667  | 2 | Specimen1_B7_3hepctrl-3hr | Live* | 3.940 | 490.572 | 405.389  |
| 3 | Specimen1_C3_3hep-6hr  | Live* | 14.246 | 1.563.690 | 895.797  | 3 | Specimen1_C7_3hepctrl-6hr | Live* | 7.078 | 761.769 | 627.019  |
| 4 | Specimen1_D1_unstained | Live* | 9.839  | 55.326    | 51.407   | 4 | Specimen1_D1_unstained    | Live* | 9.839 | 55.326  | 51.407   |

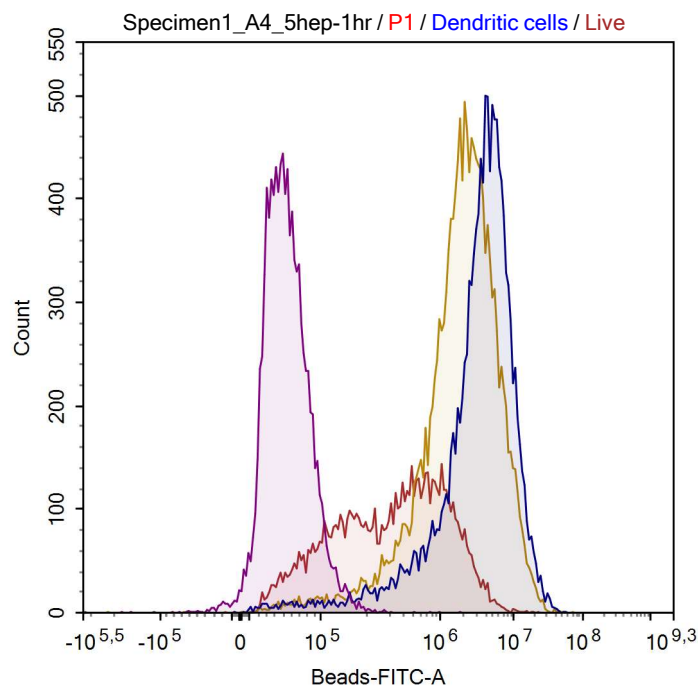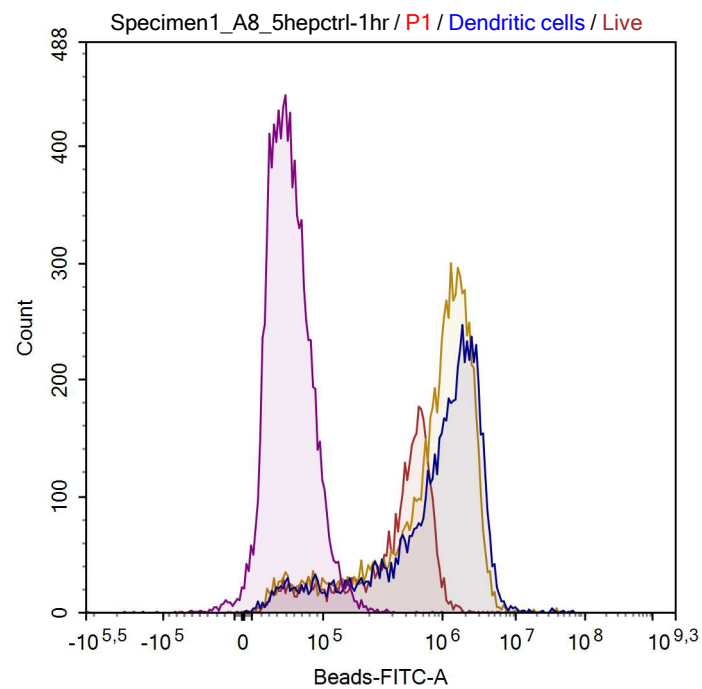

| # | Sample                 | Gate  | Count  | Mean X    | Median X  | # | Sample                    | Gate  | Count | Mean X    | Median X  |
|---|------------------------|-------|--------|-----------|-----------|---|---------------------------|-------|-------|-----------|-----------|
| 1 | Specimen1_A4_5hep-1hr  | Live  | 7.802  | 694.833   | 344.183   | 1 | Specimen1_A8_5hepctrl-1hr | Live  | 3.927 | 474.666   | 407.560   |
| 2 | Specimen1_B4_5hep-3hr  | Live* | 15.583 | 3.124.614 | 2.068.289 | 2 | Specimen1_B8_5hepctrl-3hr | Live* | 8.515 | 1.259.363 | 1.041.578 |
| 3 | Specimen1_C4_5hep-6hr  | Live* | 13.056 | 4.908.621 | 3.847.195 | 3 | Specimen1_C8_5hepctrl-6hr | Live* | 7.340 | 1.561.640 | 1.183.339 |
| 4 | Specimen1_D1_unstained | Live* | 9.839  | 55.326    | 51.407    | 4 | Specimen1_D1_unstained    | Live* | 9.839 | 55.326    | 51.407    |

# All donors combined 6hr timepoint - FLU

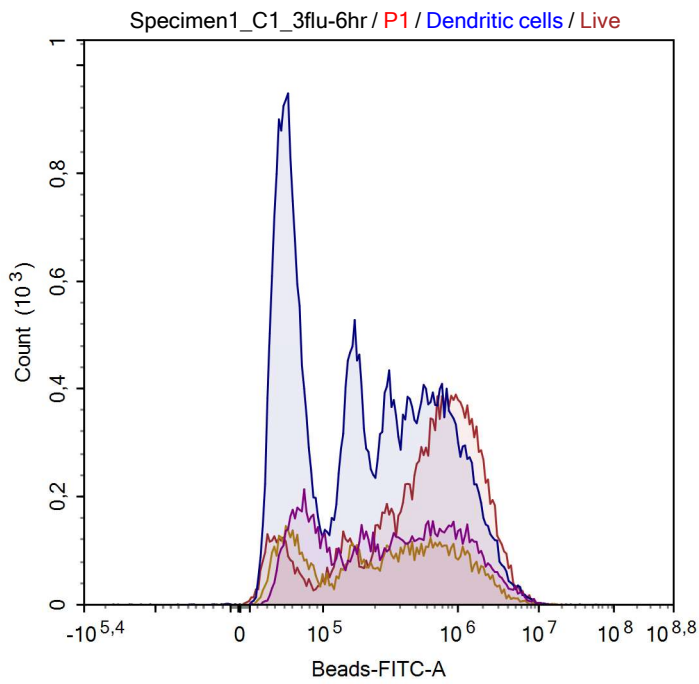

| # | Sample                | Gate  | Count  | Mean X  | Median X |
|---|-----------------------|-------|--------|---------|----------|
| 1 | Specimen1_C1_3flu-6hr | Live  | 19.496 | 898.968 | 574.998  |
| 2 | Donor 31_C1_3flu-6hr  | Live* | 9.057  | 574.420 | 249.097  |
| 3 | Donor 41_C1_3flu-6hr  | Live* | 38.209 | 438.813 | 163.632  |
| 4 | Donor 45_C1_3flu-6hr  | Live* | 12.152 | 647.736 | 250.656  |

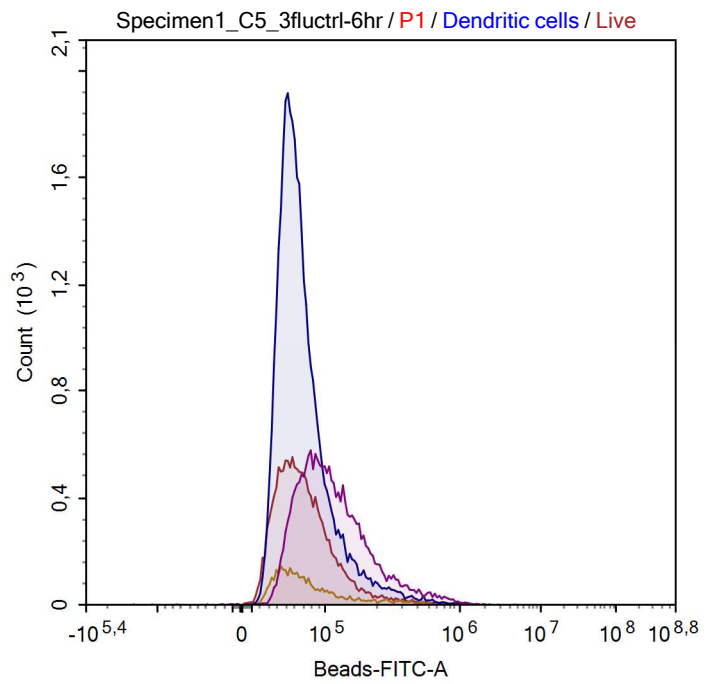

| # | Sample                    | Gate  | Count  | Mean X  | Median X |
|---|---------------------------|-------|--------|---------|----------|
| 1 | Specimen1_C5_3fluctrl-6hr | Live  | 14.836 | 80.145  | 65.771   |
| 2 | Donor 31_C5_3fluctrl-6hr  | Live* | 3.508  | 102.194 | 66.283   |
| 3 | Donor 41_C5_3fluctrl-6hr  | Live* | 35.635 | 76.946  | 61.943   |
| 4 | Donor 45_C5_3fluctrl-6hr  | Live* | 18.815 | 132.241 | 101.177  |

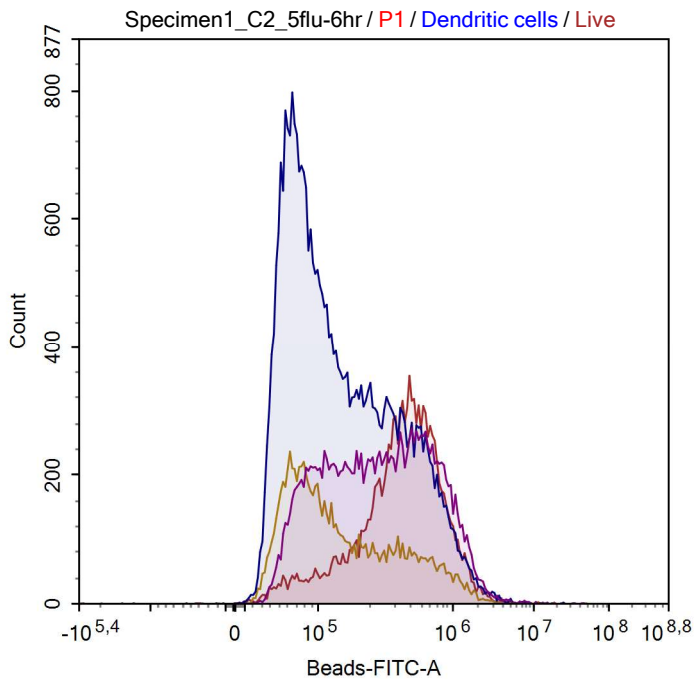

| # | Sample                | Gate  | Count  | Mean X  | Median X |
|---|-----------------------|-------|--------|---------|----------|
| 1 | Specimen1_C2_5flu-6hr | Live  | 12.068 | 466.762 | 356.032  |
| 2 | Donor 31_C2_5flu-6hr  | Live* | 9.603  | 261.009 | 114.100  |
| 3 | Donor 41_C2_5flu-6hr  | Live* | 32.444 | 235.225 | 114.565  |
| 4 | Donor 45_C2_5flu-6hr  | Live* | 17.672 | 414.182 | 230.279  |

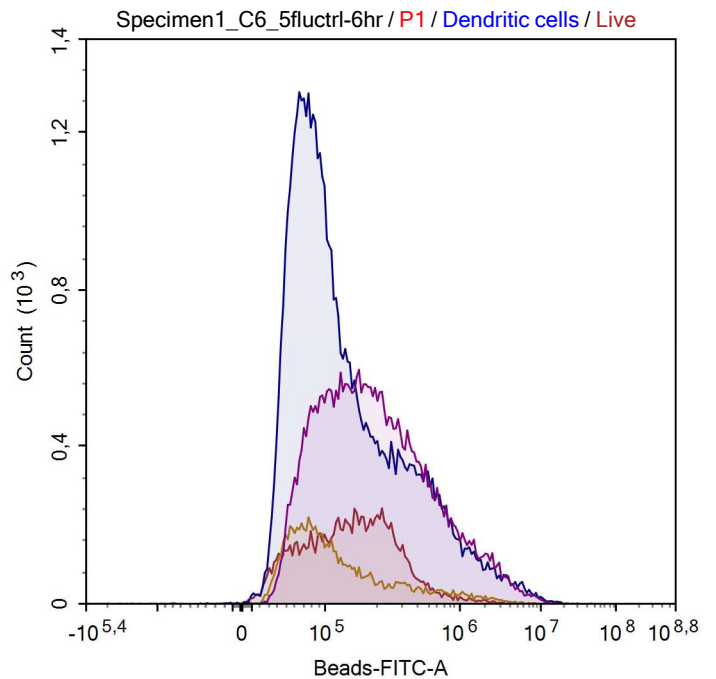

| # | Sample                    | Gate  | Count  | Mean X  | Median X |
|---|---------------------------|-------|--------|---------|----------|
| 1 | Specimen1_C6_5fluctrl-6hr | Live  | 11.761 | 197.478 | 140.344  |
| 2 | Donor 31_C6_5fluctrl-6hr  | Live* | 8.031  | 247.583 | 98.258   |
| 3 | Donor 41_C6_5fluctrl-6hr  | Live* | 52.039 | 317.900 | 105.272  |
| 4 | Donor 45_C6_5fluctrl-6hr  | Live* | 35.744 | 428.219 | 176.819  |

# All donors combined 6hr timepoint - HEP

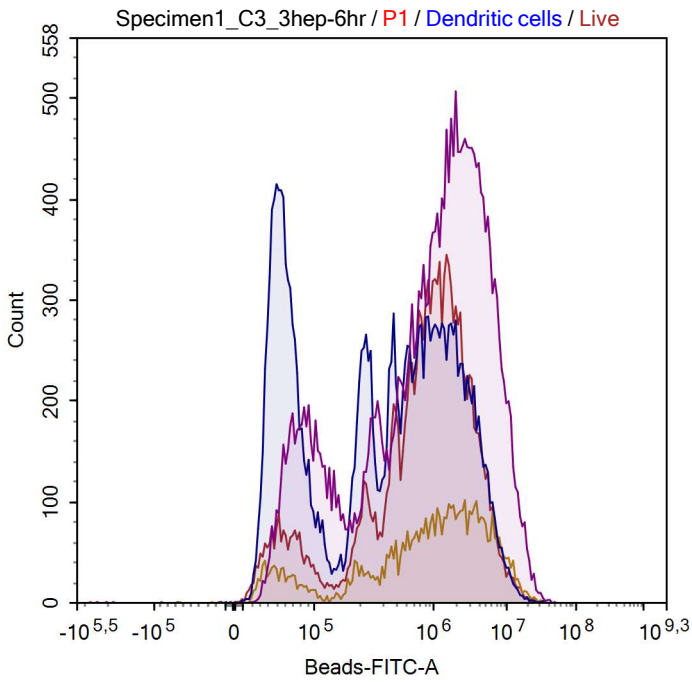

| # | Sample                | Gate  | Count  | Mean X    | Median X  |
|---|-----------------------|-------|--------|-----------|-----------|
| 1 | Specimen1_C3_3hep-6hr | Live  | 14.246 | 1.563.690 | 895.797   |
| 2 | Donor 31_C3_3hep-6hr  | Live* | 5.300  | 2.507.104 | 1.141.961 |
| 3 | Donor 41_C3_3hep-6hr  | Live* | 20.978 | 1.072.366 | 360.326   |
| 4 | Donor 45_C3_3hep-6hr  | Live* | 25.633 | 2.508.999 | 1.172.151 |

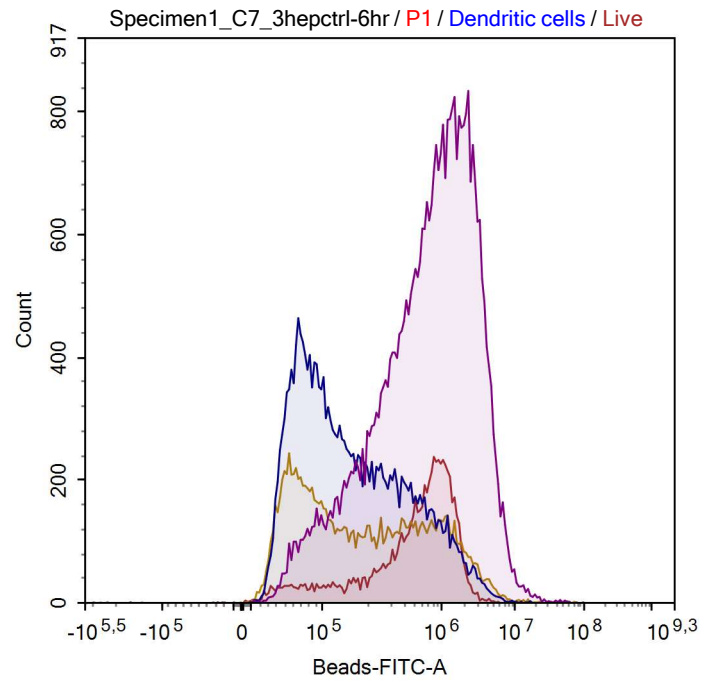

| # | Sample                    | Gate  | Count  | Mean X    | Median X |
|---|---------------------------|-------|--------|-----------|----------|
| 1 | Specimen1_C7_3hepctrl-6hr | Live  | 7.078  | 761.769   | 627.019  |
| 2 | Donor 31_C7_3hepctrl-6hr  | Live* | 12.654 | 607.275   | 168.234  |
| 3 | Donor 41_C7_3hepctrl-6hr  | Live* | 20.316 | 357.293   | 131.236  |
| 4 | Donor 45_C7_3hepctrl-6hr  | Live* | 37.711 | 1.454.734 | 835.261  |

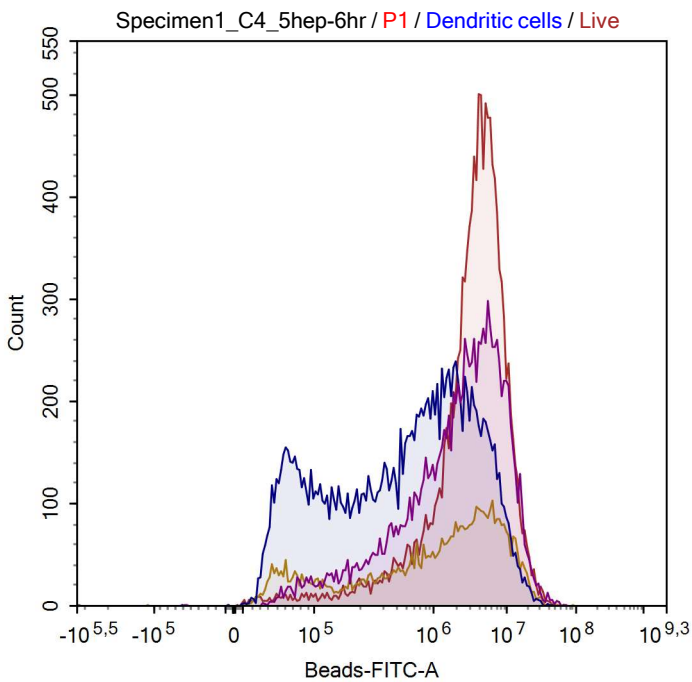

| # | Sample                | Gate  | Count  | Mean X    | Median X  |
|---|-----------------------|-------|--------|-----------|-----------|
| 1 | Specimen1_C4_5hep-6hr | Live  | 13.056 | 4.908.621 | 3.847.195 |
| 2 | Donor 31_C4_5hep-6hr  | Live* | 5.234  | 3.710.281 | 1.614.936 |
| 3 | Donor 41_C4_5hep-6hr  | Live* | 15.764 | 1.852.649 | 611.403   |
| 4 | Donor 45_C4_5hep-6hr  | Live* | 11.807 | 4.327.917 | 2.545.932 |

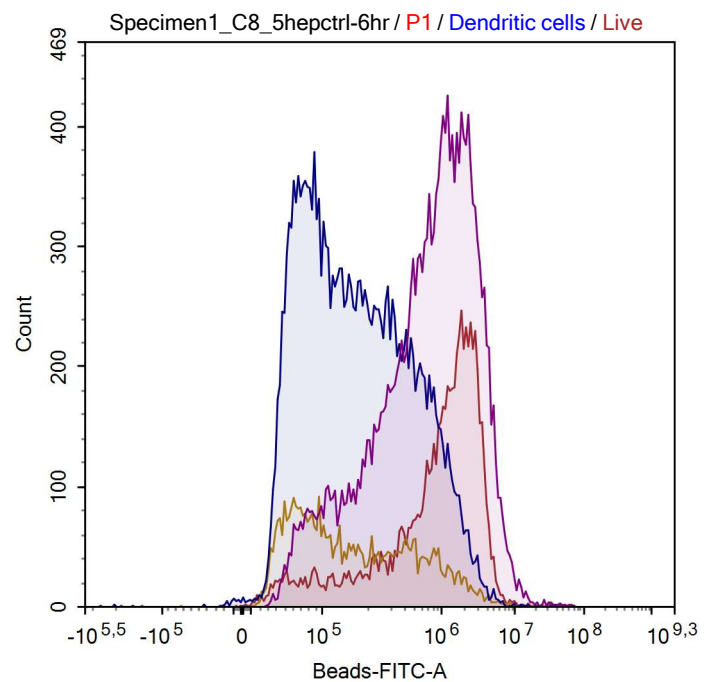

| # | Sample                    | Gate  | Count  | Mean X    | Median X  |
|---|---------------------------|-------|--------|-----------|-----------|
| 1 | Specimen1_C8_5hepctrl-6hr | Live  | 7.340  | 1.561.640 | 1.183.339 |
| 2 | Donor 31_C8_5hepctrl-6hr  | Live* | 4.620  | 477.545   | 140.718   |
| 3 | Donor 41_C8_5hepctrl-6hr  | Live* | 20.336 | 363.463   | 152.320   |
| 4 | Donor 45_C8_5hepctrl-6hr  | Live* | 18.985 | 1.458.732 | 829.042   |
