# Supplementary material for: Assessing the Immunomodulatory Effect of Size on the Uptake and Immunogenicity of Influenza- and Hepatitis B Subunit Vaccines In Vitro
Source: Pharmaceuticals (Basel). 2022 Jul 18;15(7):887. doi: 10.3390/ph15070887 (PMC9321264; doi:10.3390/ph15070887)
Supplement: Supplementary file 1 [file pharmaceuticals-15-00887-s001.zip]

Archive with 5 entries (5 files):
- pharmaceuticals-1786424-supplementary.pdf
- Supplementary file S1.pdf
- Supplementary file S2.pdf
- Supplementary file S3.pdf
- Supplementary file S4.pdf
